# Supplementary material for: Genomic Breakpoint Characterization and Transcriptome Analysis of Metastatic, Recurrent Desmoplastic Small Round Cell Tumor
Source: Sarcoma. 2023 Jul 6;2023:6686702. doi: 10.1155/2023/6686702 (PMC10344636; doi:10.1155/2023/6686702)
Supplement: Supplementary Materials — Supplementary Figure 1: DSRCT cell line genomic breakpoints. Histograms of Sanger sequencing results from DSRCT cell lines: JN-DSRCT-1, BER-DSRCT, BOD-DSRCT, SK-DSRCT1, and SK-DSRCT2. Red and green lines show the original sequence of EWSR1 and WT1 introns, respectively. Region between the black vertical lines shows the microhomology shared by both EWSR1 and WT1 introns, if any. Supplementary Figure 2: DSRCT genomic breakpoints. Histograms of Sanger sequencing results from DSRCTs: MSK4832, MSK4991, MSK5070, MSK5338, and MSK5117. Red and green lines show the original sequence of EWSR1 and WT1 introns, respectively. Region between the black vertical lines shows the microhomology shared by both EWSR1 and WT1 introns, if any. Supplementary Figure 3: DSRCT genomic breakpoints. (A) Venn diagrams identifying commonly upregulated and downregulated genes between DSRCT versus SARC normal tissues(green) and DSRCT versus LIHC normal tissues(purple). Genes were considered differentially expressed if p < 0.05 and |log2FC| > 2. (B) Top 15 KEGG-enriched pathways between recurrent and primary DSRCTs from GSEA. (C) GSEA of KEGG pathways on recurrent versus primary DSRCTs showing upregulation of cell cycle, homologous recombination, and the spliceosome, while showing downregulation of TNF signaling, cytokine receptor interaction, and focal adhesion. Supplementary Table 1: DSRCT patient samples. Supplementary Table 2: PCR primers. Supplementary Table 3: RT-qPCR primers. Supplementary Data 1: DSRCT pathway enrichment analysis. [file 6686702.f1.zip › Supplementary Data 1.xlsx]

## Sheet: RecurrentvPrimary DSRCT GO-BP
	ID	Description	setSize	enrichmentScore	NES	pvalue	p.adjust	qvalues	rank	leading_edge	core_enrichment
GO:0000070	GO:0000070	mitotic sister chromatid segregation	146	0.670983	2.91828	1e-10	2.83487e-09	1.5428e-09	1082	tags=37%	list=7%	signal=35%	891/83540/7272/9787/3833/991/51203/9232/81930/9212/64151/23397/701/11130/146909/9928/11004/9700/699/113130/990/55143/1062/24137/29127/5347/9055/10403/151648/10615/84101/64105/9319/26271/4085/54908/1063/10592/79075/9493/3835/90417/9918/4751/3619/10051/81620/23212/7517/10460/23310/84250/79980/54627
GO:0000075	GO:0000075	cell cycle checkpoint	211	0.493426	2.25167	1e-10	2.83487e-09	1.5428e-09	2735	tags=34%	list=18%	signal=28%	641/891/7272/991/7153/995/9212/8318/701/11130/1869/983/6790/699/144455/2810/63967/990/1111/84072/51512/51514/5347/10403/79733/4998/84101/9319/8091/90381/4085/146956/54908/1063/83990/4436/8914/79968/7483/81620/11073/8883/55055/7517/5111/5629/6664/595/10459/5810/3265/11200/65975/25896/9735/9984/5591/55159/64858/1763/348654/54465/672/83695/5884/1027/1017/29980/57472/54962/3364/7155
GO:0000226	GO:0000226	microtubule cytoskeleton organization	497	0.419616	2.11155	1e-10	2.83487e-09	1.5428e-09	3062	tags=34%	list=20%	signal=28%	891/83540/7272/3833/991/332/51203/81930/10112/259266/9212/221150/22974/1058/146909/983/79000/11004/6790/9700/4605/1111/1062/24137/29127/3832/5347/347240/9055/57405/10403/6491/151648/3925/10615/10733/26271/4085/4233/54908/79929/89958/63979/9493/25886/899/90417/284403/220134/64793/4751/347733/79187/440193/387103/22995/163786/29899/55521/26586/10383/3796/7517/10460/55722/80128/347688/9024/51361/8045…
GO:0000280	GO:0000280	nuclear division	356	0.532171	2.5842	1e-10	2.83487e-09	1.5428e-09	2065	tags=36%	list=13%	signal=32%	891/83540/11065/7272/9787/3833/991/332/51203/7153/9232/9088/995/81930/54443/259266/9212/64151/23397/701/11130/8438/22974/146909/9134/9928/11004/6790/9700/699/113130/990/1164/55143/4605/1111/84072/1062/24137/29127/3832/5347/9055/10403/151648/10615/4288/84101/9585/64105/64180/9319/26271/4085/4603/146956/54908/1063/10592/84057/83990/79075/63979/29893/9493/3835/91646/5888/90417/55706/9918/64793/4751/…
GO:0000375	GO:0000375	RNA splicing via transesterification reactions	326	0.413703	2.00127	1e-10	2.83487e-09	1.5428e-09	6357	tags=63%	list=42%	signal=37%	4857/1993/79622/80004/84530/135295/25804/6732/10212/23658/6636/6632/6606/51692/54715/146713/10907/6635/28960/51319/6637/60680/6626/11168/10189/1479/6631/54033/55110/58155/10465/10419/10283/50628/51645/64783/5433/84844/22827/1477/1478/5437/8899/2483/84872/4686/11218/6634/57819/51690/24144/25862/55339/8175/23517/6628/3187/84292/79869/55285/6421/9410/6428/9716/708/51729/140890/6936/9879/5438/57794/1…
GO:0000377	GO:0000377	RNA splicing via transesterification reactions with bulged adenosine as nucleophile	323	0.415057	2.00668	1e-10	2.83487e-09	1.5428e-09	6357	tags=63%	list=42%	signal=38%	4857/1993/79622/80004/84530/135295/25804/6732/10212/23658/6636/6632/6606/51692/54715/146713/10907/6635/28960/51319/6637/60680/6626/11168/10189/1479/6631/54033/55110/58155/10465/10419/10283/50628/51645/64783/5433/84844/22827/1477/1478/5437/8899/2483/84872/4686/11218/6634/57819/51690/24144/25862/55339/8175/23517/6628/3187/84292/79869/55285/6421/9410/6428/9716/708/51729/140890/6936/9879/5438/57794/1…
GO:0000398	GO:0000398	mRNA splicing via spliceosome	323	0.415057	2.00668	1e-10	2.83487e-09	1.5428e-09	6357	tags=63%	list=42%	signal=38%	4857/1993/79622/80004/84530/135295/25804/6732/10212/23658/6636/6632/6606/51692/54715/146713/10907/6635/28960/51319/6637/60680/6626/11168/10189/1479/6631/54033/55110/58155/10465/10419/10283/50628/51645/64783/5433/84844/22827/1477/1478/5437/8899/2483/84872/4686/11218/6634/57819/51690/24144/25862/55339/8175/23517/6628/3187/84292/79869/55285/6421/9410/6428/9716/708/51729/140890/6936/9879/5438/57794/1…
GO:0000724	GO:0000724	double-strand break repair via homologous recombination	129	0.559641	2.39885	1e-10	2.83487e-09	1.5428e-09	3630	tags=53%	list=24%	signal=41%	641/10635/8318/8438/51659/79000/1111/9401/4173/10721/4796/84296/2237/4171/63979/5888/112441434/8317/116028/8914/4174/253714/55135/7517/84515/4172/2187/55010/6119/675/80010/4176/10459/7516/147872/7334/25788/55159/5932/348654/672/23347/79728/9985/142/5889/5980/10213/548593/3364/54617/64110/55137/5893/6421/7515/55183/79008/55218/4361/84464/125150/4175/23028/6117/4683/80311/6118
GO:0000725	GO:0000725	recombinational repair	130	0.561286	2.41144	1e-10	2.83487e-09	1.5428e-09	3630	tags=53%	list=24%	signal=41%	641/10635/8318/8438/51659/79000/1111/9401/4173/10721/4796/84296/2237/4171/63979/5888/112441434/8317/116028/8914/4174/253714/55135/7517/84515/4172/2187/55010/6119/675/80010/4176/10459/7516/147872/7334/25788/55159/5932/348654/672/83695/23347/79728/9985/142/5889/5980/10213/548593/3364/54617/64110/55137/5893/6421/7515/55183/79008/55218/4361/84464/125150/4175/23028/6117/4683/80311/6118
GO:0000819	GO:0000819	sister chromatid segregation	173	0.647706	2.90382	1e-10	2.83487e-09	1.5428e-09	1083	tags=35%	list=7%	signal=33%	891/83540/7272/9787/3833/991/51203/7153/9232/81930/9212/64151/23397/701/11130/146909/9928/11004/9700/699/113130/990/55143/84072/1062/24137/29127/5347/9055/10403/151648/10615/84101/64105/9319/26271/4085/2237/54908/1063/10592/79075/9493/3835/90417/9918/116028/4751/3619/157570/151246/10051/81620/23212/7517/10460/23310/84250/79980/54627/1663
GO:0001501	GO:0001501	skeletal system development	414	-0.453235	-2.21428	1e-10	2.83487e-09	1.5428e-09	1601	tags=26%	list=10%	signal=24%	26585/6722/91461/51738/56603/1969/150356/56172/6781/5027/64764/7291/4054/4318/3203/1028/2702/2247/22856/3216/1240/6886/579/10859/10019/84159/5744/4487/10234/4094/176/6935/302/649/64131/51435/5358/9770/59341/5549/2200/7305/4323/960/6261/2487/2022/1291/9060/871/1462/353500/11173/94/144347/64856/1292/6678/4256/85301/50515/1513/7045/5156/23213/652/64651/359845/7048/1893/2737/9507/55959/7421/1311/4920…
GO:0001503	GO:0001503	ossification	324	-0.497294	-2.37601	1e-10	2.83487e-09	1.5428e-09	1740	tags=31%	list=11%	signal=28%	10140/8519/51564/9902/6497/8321/9464/7010/57154/9260/7286/26585/91461/5552/7123/10457/5587/1969/56172/6781/5027/7291/4054/26578/10272/3727/58476/23051/1901/22856/23601/6696/3486/3082/1051/5744/7171/10312/649/1435/64131/596/9770/1956/1230/4323/8792/6261/1291/54829/3399/1462/353500/3371/144347/3726/8482/6678/4256/115908/1513/1052/652/359845/1959/1893/2737/1311/4920/6615/6348/255743/79633/7043/90993…
GO:0001525	GO:0001525	angiogenesis	442	-0.559167	-2.74158	1e-10	2.83487e-09	1.5428e-09	2362	tags=43%	list=15%	signal=37%	387/2113/2260/10519/3315/8828/406919/153090/91010/2896/2004/83700/56913/9734/2876/6774/64218/5333/64855/22846/51564/5797/3688/113026/9314/4855/2683/10203/9464/9289/161742/7010/6464/57007/4240/3586/406913/1284/3606/64094/4846/3685/26585/6722/3087/10769/4804/51738/9037/7128/301/56999/284/57608/10457/5587/8829/8434/1969/6672/2028/23210/6915/5371/54922/7291/5175/6303/2246/51330/28984/3553/2702/388/22…
GO:0001667	GO:0001667	ameboidal-type cell migration	356	-0.457225	-2.20467	1e-10	2.83487e-09	1.5428e-09	2362	tags=37%	list=15%	signal=32%	387/2113/2260/10519/3315/10509/8828/5581/153090/23499/406943/2896/5793/57449/3611/5467/9734/2876/7114/9647/64218/55198/8754/22846/51564/6273/5797/3037/3688/9314/9464/161742/5063/7010/406913/56920/64094/5641/4846/26585/6405/6722/10769/9037/301/56999/397/284/4070/57608/5587/5606/8829/1969/5829/5979/6672/9922/6781/6915/5371/7291/5175/1910/11221/4318/1803/2246/28984/388/2247/8613/161198/4627/1512/516…
GO:0001818	GO:0001818	negative regulation of cytokine production	224	-0.501805	-2.31704	1e-10	2.83487e-09	1.5428e-09	2879	tags=42%	list=19%	signal=35%	197358/84282/90865/1540/3620/9111/10225/215/5788/29126/384/9454/602/9655/7124/79132/2260/89795/406919/28951/3134/27202/9734/84868/7114/9246/1992/695/55198/113/79589/51564/114769/4790/9314/3071/9308/23208/558/3586/51738/5552/7128/301/284/26191/10457/1969/5371/2615/2621/7291/28984/9173/1240/114548/3082/114899/10859/604/3965/4092/131450/3635/8832/3718/6556/80149/7305/945/2335/2213/11213/947/7099/684…
GO:0001819	GO:0001819	positive regulation of cytokine production	365	-0.410164	-1.98335	1e-10	2.83487e-09	1.5428e-09	2884	tags=36%	list=19%	signal=30%	3659/84282/55601/90865/148022/3620/79792/25/84265/5970/84818/4615/5788/29126/3394/567/3303/602/3098/728/6397/7124/283234/975/7349/79132/91543/3654/9261/916/3315/26137/661/5336/8764/1191/5142/3134/84868/6774/3595/115004/4790/834/3557/9308/64127/80381/192683/54440/3663/3586/3606/1535/5724/301/64170/26191/5027/948/7291/84433/28984/3553/4155/9208/247/2207/10631/9173/23601/5295/920/941/23643/114548/30…
GO:0001935	GO:0001935	endothelial cell proliferation	131	-0.586946	-2.53393	1e-10	2.83487e-09	1.5428e-09	2418	tags=43%	list=16%	signal=36%	7124/574506/2260/8828/406919/406943/6774/22846/858/5797/7010/3586/406913/1535/4804/51738/9037/57608/5587/8854/8829/1969/5365/28984/2247/2321/3164/6347/51162/857/7857/3690/4323/187/6776/84913/1012/947/1960/5228/94/7424/8291/6678/8742/23213/652/5155/1893/4017/3725/7046/8862/6387/2152/7057
GO:0001936	GO:0001936	regulation of endothelial cell proliferation	116	-0.596337	-2.5386	1e-10	2.83487e-09	1.5428e-09	2418	tags=45%	list=16%	signal=38%	7124/574506/2260/8828/406919/406943/6774/22846/858/5797/7010/3586/406913/1535/4804/51738/9037/57608/5587/8854/8829/5365/28984/2247/2321/3164/6347/51162/857/7857/3690/187/6776/84913/1012/1960/5228/94/7424/8291/6678/8742/23213/652/5155/1893/3725/7046/8862/6387/2152/7057
GO:0002237	GO:0002237	response to molecule of bacterial origin	262	-0.479152	-2.25856	1e-10	2.83487e-09	1.5428e-09	3169	tags=47%	list=21%	signal=38%	10333/7040/8767/6714/117854/79155/7292/210/55970/29/1312/488/133/1234/23641/148022/3620/25/10225/5970/57048/29126/3394/567/25819/353376/728/7124/22904/387/3654/9261/721/5581/153090/824/10221/5336/2920/5142/5467/84868/8754/3595/114769/4790/834/3557/64127/4129/968/558/259230/3663/3586/3606/4846/5724/129607/4792/7128/2353/9572/3587/64170/26191/3656/1439/6915/5027/948/1910/11221/4067/1604/3553/3727/9…
GO:0002250	GO:0002250	adaptive immune response	318	-0.437135	-2.08961	1e-10	2.83487e-09	1.5428e-09	2727	tags=42%	list=18%	signal=35%	10875/81622/64167/89790/7942/2067/5788/29126/182/23075/567/384/602/9655/7124/975/11119/201294/2015/200558/3426/91543/916/721/10538/8764/83700/1880/1191/974/3134/84868/695/6774/64218/7462/3117/113/919/7454/3106/5452/10384/720/84807/11118/54440/3586/3105/3606/202309/5873/79168/11025/11006/7030/717/1514/7128/84766/301/5293/3107/3120/1520/10673/55824/64092/5027/11221/11035/4067/1604/3553/64005/2207/9…
GO:0002275	GO:0002275	myeloid cell activation involved in immune response	471	-0.391887	-1.93483	1e-10	2.83487e-09	1.5428e-09	2546	tags=31%	list=17%	signal=27%	3687/567/3303/4758/51816/353376/728/22904/1113/4125/9725/1675/55276/201294/387/3683/535/976/100049587/5581/8987/81567/6515/391/2548/2896/3310/51411/966/5768/47/84868/4973/1992/1471/695/5476/1774/7462/230/25798/4790/3071/84329/374403/11314/3614/4126/2683/683/56729/9535/968/6284/7414/5660/6810/5873/11025/1535/6793/3685/5724/6386/3101/84766/5293/2512/4033/84514/10493/1520/3684/5337/1508/6518/64333/9…
GO:0002444	GO:0002444	myeloid leukocyte mediated immunity	478	-0.392814	-1.94216	1e-10	2.83487e-09	1.5428e-09	2546	tags=31%	list=17%	signal=26%	3687/567/3303/4758/51816/353376/728/1113/4125/9725/1675/55276/201294/387/3683/535/976/100049587/8987/81567/6515/391/2548/2896/9948/3310/51411/966/5768/47/4973/1992/1471/695/5476/1774/7462/230/25798/4790/3071/84329/374403/11314/3614/4126/2683/683/56729/9535/968/6284/7414/5660/6810/5873/11025/1535/6793/3685/5724/6386/3101/84766/5293/2512/4033/84514/10493/1520/3684/5337/1508/6518/64333/963/948/5175/…
GO:0002446	GO:0002446	neutrophil mediated immunity	433	-0.394069	-1.93216	1e-10	2.83487e-09	1.5428e-09	2546	tags=31%	list=17%	signal=26%	2588/5788/3687/567/3303/4758/51816/353376/728/4125/9725/1675/55276/201294/387/3683/535/976/100049587/8987/81567/6515/391/2548/2896/9948/3310/51411/966/5768/47/4973/1992/1471/5476/1774/230/25798/4790/3071/84329/374403/11314/3614/4126/2683/683/56729/9535/968/7414/5660/5873/11025/1535/6793/3685/5724/6386/3101/84766/2512/4033/84514/10493/1520/3684/5337/1508/6518/64333/963/948/5175/6402/4318/26578/803…
GO:0002521	GO:0002521	leukocyte differentiation	412	-0.488378	-2.38766	1e-10	2.83487e-09	1.5428e-09	2520	tags=38%	list=16%	signal=33%	567/3956/602/9655/133522/56833/7124/22904/975/387/91543/84456/916/8324/10538/10221/5336/1880/974/9452/9734/863/695/79705/6774/64218/51341/3688/3071/7409/140685/5452/9308/57630/286410/558/84807/4242/54440/3586/3606/760/11025/11006/3707/3589/84959/6722/3087/3059/7030/678/2353/56603/301/5293/26191/1316/1969/1840/23210/2621/9580/112616/11221/4055/4318/11035/84433/4067/10272/9935/2207/5153/4627/5295/9…
GO:0002573	GO:0002573	myeloid leukocyte differentiation	168	-0.556936	-2.48995	1e-10	2.83487e-09	1.5428e-09	2434	tags=42%	list=16%	signal=35%	133522/7124/22904/975/84456/10538/10221/1880/863/79705/140685/760/11025/11006/84959/3059/7030/2353/5293/1969/4055/4318/4067/10272/9935/2207/5153/4627/5295/920/126014/6886/1051/10859/677/10234/861/10312/302/6688/1435/146433/7097/3635/9644/9770/55509/1230/2200/7305/8792/7098/4609/7099/714/3726/972/3428/652/7048/1436/4920/6348/10100/3725/375387/3624/54209/8840/3976
GO:0002683	GO:0002683	negative regulation of immune system process	334	-0.471825	-2.25515	1e-10	2.83487e-09	1.5428e-09	2884	tags=41%	list=19%	signal=34%	3659/197358/90865/8861/51043/135/3620/9111/10875/10225/55080/2852/5788/6422/29126/384/9655/56833/6397/7124/79132/3949/10519/10221/2896/8764/1997/966/3134/933/27202/84868/2876/695/140685/11314/10475/1845/968/558/84807/3586/11025/11006/3707/26585/84959/4792/7128/9572/301/284/9750/26191/10457/55824/1840/79148/10077/64092/2615/11221/4067/10272/1604/146722/9935/54625/2207/9173/5295/941/6886/55365/1051…
GO:0002685	GO:0002685	regulation of leukocyte migration	155	-0.538965	-2.39469	1e-10	2.83487e-09	1.5428e-09	2423	tags=42%	list=16%	signal=36%	83692/7423/23075/728/56833/7124/975/387/80024/8764/83700/27202/4267/4478/3071/11314/683/5641/6793/26585/5724/301/9750/81704/79148/2621/11035/4067/4354/1240/3965/6347/131450/199/83483/1435/59341/1230/4323/3383/23143/719/6351/1843/5228/7070/623/7424/8291/972/3554/1893/6348/80310/4681/11117/54209/9547/5919/9353/5054/6387/5764/7057/3569
GO:0002694	GO:0002694	regulation of leukocyte activation	404	-0.45056	-2.19007	1e-10	2.83487e-09	1.5428e-09	2603	tags=37%	list=17%	signal=32%	2852/5788/6422/29126/384/3956/9655/3485/56833/283234/975/201294/387/200558/916/3949/2896/8764/1880/3134/933/84868/1026/695/115004/196/3071/399687/7409/11314/9308/57630/64127/1845/286410/5063/683/558/84807/80381/54440/3586/6810/3606/11006/3707/5724/9402/678/7128/56603/9572/301/9750/81704/26191/10457/3684/10673/55824/1840/10077/8660/64092/2615/2621/9580/11221/11035/84433/1803/30817/4067/1604/3553/1…
GO:0002696	GO:0002696	positive regulation of leukocyte activation	250	-0.484379	-2.26873	1e-10	2.83487e-09	1.5428e-09	2580	tags=46%	list=17%	signal=39%	10333/7040/8767/6714/79155/7292/2323/57178/10808/912/4860/8440/1948/90865/51043/148022/1540/54537/5788/29126/3956/9655/3485/283234/975/387/916/8764/1880/3134/84868/1026/695/3071/7409/9308/64127/286410/5063/683/558/84807/80381/54440/3586/6810/3606/11006/3707/5724/9402/301/81704/3684/10673/8660/2621/11221/84433/1803/4067/1604/3553/2207/9173/5295/920/941/114548/10859/604/861/3965/942/3115/6347/199/1…
GO:0002761	GO:0002761	regulation of myeloid leukocyte differentiation	94	-0.620575	-2.55953	1e-10	2.83487e-09	1.5428e-09	1646	tags=38%	list=11%	signal=34%	760/11025/11006/84959/3059/7030/2353/4067/10272/9935/5295/920/6886/1051/10859/677/10234/861/1435/146433/3635/9770/1230/2200/7305/7098/4609/7099/714/972/4920/6348/3725/3624/54209/3976
GO:0006260	GO:0006260	DNA replication	262	0.568106	2.64962	1e-10	2.83487e-09	1.5428e-09	3382	tags=53%	list=22%	signal=42%	641/9156/6241/8318/55388/9134/51659/983/144455/63967/990/9837/1111/51514/9401/890/4173/79733/4998/26271/10721/90381/51053/4796/84296/146956/2237/5983/79915/80119/4171/83990/79075/10036/5888/8317/116028/8914/157570/10926/5984/580/11169/5427/2735/898/4174/81620/253714/11073/10535/63922/2956/84515/3978/4172/5985/5557/5111/1663/6119/9768/675/92667/80010/11232/4176/6240/8208/57697/5810/5426/3265/22944…
GO:0006261	GO:0006261	DNA-dependent DNA replication	148	0.645096	2.81289	1e-10	2.83487e-09	1.5428e-09	3371	tags=61%	list=22%	signal=48%	641/8318/55388/9134/51659/144455/990/9837/9401/4173/79733/4998/26271/10721/90381/51053/4796/84296/146956/2237/5983/79915/4171/79075/5888/8317/8914/10926/5984/11169/5427/898/4174/81620/253714/63922/2956/3978/4172/5985/5557/5111/1663/6119/675/92667/11232/4176/57697/5426/23649/64785/378708/11200/5424/9984/10189/5982/5425/55159/56652/1763/348654/5558/54465/58525/84083/4999/1017/5000/29980/201254/8017…
GO:0006302	GO:0006302	double-strand break repair	224	0.480523	2.21215	1e-10	2.83487e-09	1.5428e-09	3630	tags=45%	list=24%	signal=35%	641/10635/8318/8438/51659/79000/113130/2305/1111/9401/4173/9319/8091/10721/4796/84296/146956/2237/4171/83990/63979/5888/112441434/8317/116028/4436/8914/157570/580/4174/253714/55135/7517/84515/4172/84250/2187/55010/1663/6119/675/80010/4176/10459/9937/7516/11200/7468/147872/7518/7336/284071/5591/7334/25788/5885/55159/5932/64858/55775/1763/348654/672/23347/79728/9985/10038/142/5889/5980/10213/548593…
GO:0006310	GO:0006310	DNA recombination	248	0.515484	2.38997	1e-10	2.83487e-09	1.5428e-09	3630	tags=50%	list=24%	signal=39%	641/9156/7153/10635/8318/8438/51659/79000/1111/9401/4173/9319/3838/7037/10721/3149/4796/84296/146956/2237/79915/80119/84057/4171/83990/63979/29893/5888/112441434/8317/116028/4436/8914/79605/3148/4174/253714/55135/2956/7517/84515/4172/644186/2187/55010/6119/675/51176/80010/4176/79447/6932/10459/57697/86/7516/22944/378708/7468/147872/5896/7518/79725/9984/10189/6929/5591/7334/25788/5885/55159/4439/2…
GO:0006323	GO:0006323	DNA packaging	150	0.554279	2.42499	1e-10	2.83487e-09	1.5428e-09	2422	tags=34%	list=16%	signal=29%	891/11339/51203/7153/55355/64151/23397/57082/55723/1058/983/113130/79682/79019/79172/64105/64946/8091/54892/10592/4171/54069/10036/4674/9918/2491/3070/387103/3148/10051/55839/6732/23310/57673/91687/55166/8208/201161/6662/26993/378708/146059/26155/4678/8607/8520/79829/55320/23347/10155/25842
GO:0006397	GO:0006397	mRNA processing	475	0.383619	1.92497	1e-10	2.83487e-09	1.5428e-09	6696	tags=61%	list=44%	signal=36%	891/4857/1993/79622/580/55544/2334/54845/80004/84530/135295/25804/10891/84321/105/6732/10212/23658/6636/6632/6606/51692/8227/54715/146713/8458/22944/26993/104/10907/6635/28960/51319/6637/9984/60680/6626/11168/10189/1479/2966/6631/54033/55110/58155/10465/55197/10419/10283/50628/51645/64783/5433/84844/55149/285672/22827/9238/1477/1478/5437/116461/8899/283989/2483/84872/4686/11218/6634/83640/9646/28…
GO:0006909	GO:0006909	phagocytosis	238	-0.478895	-2.22473	1e-10	2.83487e-09	1.5428e-09	2811	tags=42%	list=18%	signal=35%	7456/135/25/54734/7052/3385/4615/5788/3394/10109/1793/353376/7124/201294/3949/3683/721/84286/5581/81567/4688/5336/55647/51411/83871/55198/919/3688/10095/3071/399687/7454/7409/11314/23208/3601/10458/720/9886/558/4240/9066/5873/1535/122618/3685/7275/717/286046/301/3684/23210/5027/2621/948/5175/4067/3553/146722/64005/2207/4627/5295/8877/311/81035/3055/718/6347/4689/199/7097/4481/3690/64581/8406/1794…
GO:0007015	GO:0007015	actin filament organization	351	-0.443909	-2.14294	1e-10	2.83487e-09	1.5428e-09	2673	tags=36%	list=17%	signal=31%	4082/9172/55114/653857/221061/23189/6422/389/10109/23075/7408/51466/133522/22921/134549/387/8522/5581/85358/832/391/9948/7169/81/11344/80206/7114/9647/1809/30011/10095/3071/7454/55243/84952/1902/116985/10458/5063/51332/57477/9886/9535/6624/10435/55616/2316/6722/3059/51738/25794/9037/50944/4070/50507/8829/5829/9645/221692/23433/29767/10174/85462/7791/22998/91663/7984/28984/7168/388/22836/1901/1710…
GO:0007051	GO:0007051	spindle organization	163	0.544656	2.4229	1e-10	2.83487e-09	1.5428e-09	2710	tags=40%	list=18%	signal=34%	891/83540/7272/3833/991/332/259266/9212/22974/79000/6790/9700/4605/1062/24137/29127/3832/5347/9055/57405/10403/6491/3925/10615/26271/9493/25886/90417/284403/4751/79187/387103/29899/55521/3796/10460/55722/347688/79866/54627/440145/1107/9793/8480/11200/57519/147872/7430/55142/114791/7283/29901/55726/54801/2770/93323/10636/79598/5901/115106/84722/1104/126731/6795/54617/79441
GO:0007052	GO:0007052	mitotic spindle organization	104	0.584539	2.42417	1e-10	2.83487e-09	1.5428e-09	1138	tags=30%	list=7%	signal=28%	891/83540/7272/3833/991/332/9212/22974/6790/4605/1062/24137/29127/3832/5347/9055/57405/10403/6491/3925/9493/25886/284403/4751/79187/29899/3796/10460/79866/54627/440145
GO:0007059	GO:0007059	chromosome segregation	287	0.588339	2.78539	1e-10	2.83487e-09	1.5428e-09	1332	tags=31%	list=9%	signal=29%	891/83540/11339/7272/9787/3833/991/332/157313/51203/7153/9232/81930/9212/221150/55355/64151/23397/701/11130/57082/146909/9134/9928/11004/9700/699/113130/990/55143/84072/1062/24137/29127/5347/9055/57405/10403/151648/10615/4288/84101/64105/9319/100533997/26271/81610/4085/146956/2237/54908/1894/1063/10592/83990/79075/9493/3835/54069/90417/55706/9918/220134/116028/64793/4751/3619/157570/387103/256126…
GO:0007093	GO:0007093	mitotic cell cycle checkpoint	161	0.50795	2.2606	1e-10	2.83487e-09	1.5428e-09	2735	tags=35%	list=18%	signal=29%	641/891/7272/991/7153/995/9212/701/11130/1869/983/6790/699/144455/2810/63967/990/51512/5347/10403/79733/4998/84101/9319/8091/90381/4085/146956/54908/1063/4436/7483/81620/11073/8883/55055/7517/5111/595/10459/3265/11200/65975/9735/5591/55159/64858/348654/672/5884/1027/1017/29980/57472/54962/3364/7155
GO:0007159	GO:0007159	leukocyte cell-cell adhesion	269	-0.516229	-2.44601	1e-10	2.83487e-09	1.5428e-09	3043	tags=50%	list=20%	signal=41%	3676/7040/8767/5074/6714/7292/57178/10808/912/4860/8440/1948/3659/51043/1540/135/3620/10875/5465/5970/5788/29126/384/3956/10725/9655/3485/7124/283234/975/387/2113/3654/916/3683/8764/84868/4478/3037/3688/9314/3071/7409/11314/2650/9308/64127/1845/5063/84807/80381/54440/3586/3606/11006/3707/6793/5724/9402/301/9750/81704/26191/10457/6404/10673/55824/1840/2615/51148/83706/5175/6402/11221/84433/1803/40…
GO:0007160	GO:0007160	cell-matrix adhesion	196	-0.528265	-2.40743	1e-10	2.83487e-09	1.5428e-09	2583	tags=42%	list=17%	signal=35%	8874/6422/182/3679/81792/387/916/10519/3683/23499/83700/59339/3611/8516/9647/8754/3688/1845/683/7010/79834/7414/3685/6722/56999/8829/948/3987/5175/7791/22998/10631/5295/604/10391/64098/1435/3693/596/90102/10979/54749/3690/10232/4814/4323/1029/960/2335/2039/1012/947/1896/3689/50509/7070/23603/94/29984/4811/22795/4035/5328/10395/255743/87/1946/10580/1281/4921/9358/1490/11117/10516/6614/2824/1842/50…
GO:0007162	GO:0007162	negative regulation of cell adhesion	232	-0.526127	-2.44014	1e-10	2.83487e-09	1.5428e-09	2825	tags=46%	list=18%	signal=38%	51043/135/3620/25/10875/5465/23189/5788/29126/182/23075/384/3956/9655/574506/387/6494/8324/5362/8764/81/84868/9647/9314/11314/3557/1845/84807/3586/5592/84959/9037/301/397/284/9750/4070/26191/10457/8322/5365/5420/55824/1840/2615/91663/28984/4155/10631/5295/941/445/1051/10859/10019/604/861/10391/3965/942/114897/4092/80709/10288/53827/285/90102/3718/59341/80149/4323/1029/140706/406890/2039/2213/3559…
GO:0007229	GO:0007229	integrin-mediated signaling pathway	96	-0.602702	-2.49674	1e-10	2.83487e-09	1.5428e-09	2546	tags=47%	list=17%	signal=39%	3687/3679/1793/3683/3611/8516/8754/3688/7409/683/2316/3685/7094/5587/8829/3684/10077/83706/3987/7791/2207/4627/55679/4739/9564/3055/2533/3693/10979/3690/7305/5341/2039/3689/3680/7070/8482/9510/1281/9358/1490/3678/1307/5764/22801
GO:0009617	GO:0009617	response to bacterium	424	-0.412571	-2.01768	1e-10	2.83487e-09	1.5428e-09	3091	tags=42%	list=20%	signal=34%	6714/55008/117854/79155/7292/912/210/6332/55970/4781/8837/29/1312/488/7110/133/1234/23641/148022/3620/79792/25/10225/3001/5970/3140/57048/4615/29126/3394/567/384/602/25819/353376/728/56833/7124/22904/1113/79132/387/3654/9261/721/7132/5581/153090/824/10221/2896/5336/8764/2920/114132/974/5142/4939/5467/84868/2876/8754/3595/114769/4790/834/3557/64127/23208/4129/10458/968/6464/558/259230/3663/5650/35…
GO:0010594	GO:0010594	regulation of endothelial cell migration	154	-0.530354	-2.35668	1e-10	2.83487e-09	1.5428e-09	2407	tags=42%	list=16%	signal=36%	574506/387/2113/2260/10519/3315/8828/153090/406943/2896/9734/7114/64218/22846/51564/5797/9314/161742/7010/406913/64094/5641/4846/10769/9037/301/56999/284/57608/5587/5606/8829/1969/6672/6781/6915/2246/28984/388/2247/8613/9564/23328/958/79812/285/57381/3690/80149/6776/84913/25960/94/7424/27286/6678/652/5155/1634/407006/9353/406994/5743/5764/7057
GO:0010631	GO:0010631	epithelial cell migration	265	-0.510256	-2.41316	1e-10	2.83487e-09	1.5428e-09	2522	tags=42%	list=16%	signal=36%	4215/51466/1793/574506/387/2113/2260/10519/3315/8828/5581/153090/23499/406943/2896/5793/57449/5467/9734/2876/7114/9647/64218/8754/22846/51564/6273/5797/3037/3688/9314/161742/7010/406913/64094/5641/4846/26585/6722/10769/9037/301/56999/284/4070/57608/5587/5606/8829/1969/5829/6672/9922/6781/6915/5175/11221/4318/1803/2246/28984/388/2247/8613/161198/4627/1512/5168/9564/6091/3164/23328/958/79812/152007…
GO:0010632	GO:0010632	regulation of epithelial cell migration	209	-0.497294	-2.27341	1e-10	2.83487e-09	1.5428e-09	2522	tags=41%	list=16%	signal=35%	4215/51466/1793/574506/387/2113/2260/10519/3315/8828/5581/153090/23499/406943/2896/5793/9734/7114/9647/64218/8754/22846/51564/5797/3037/9314/161742/7010/406913/64094/5641/4846/10769/9037/301/56999/284/4070/57608/5587/5606/8829/1969/6672/9922/6781/6915/11221/4318/2246/28984/388/2247/8613/1512/5168/9564/23328/958/79812/152007/285/57381/3690/80149/6776/84913/25960/23603/94/7424/1839/27286/6678/652/7…
GO:0010810	GO:0010810	regulation of cell-substrate adhesion	188	-0.530213	-2.39661	1e-10	2.83487e-09	1.5428e-09	2626	tags=44%	list=17%	signal=37%	23189/8874/6422/10109/182/3956/1793/574506/201294/387/916/10519/5581/23499/8324/59339/3611/25890/81/9647/3037/1845/683/7010/79834/64094/2316/4070/8322/8829/948/3987/22998/91663/10631/5295/55679/4739/604/133584/10391/79812/285/1435/596/90102/4814/4323/1029/2335/2039/1012/2192/57091/7070/23603/94/29984/4811/4035/5328/10395/6695/255743/1946/10085/4921/10630/1277/11117/2824/3678/2199/1842/5054/151887…
GO:0018108	GO:0018108	peptidyl-tyrosine phosphorylation	301	-0.425316	-2.02498	1e-10	2.83487e-09	1.5428e-09	2418	tags=34%	list=16%	signal=29%	7124/975/23568/2260/868/7465/916/8444/7132/5581/10188/8764/6503/695/79705/6774/30844/3595/2051/11314/683/7010/6464/558/79834/3356/3606/3589/26585/83666/91461/3059/51738/284/50507/5606/8829/1969/5979/64092/2621/6690/948/5175/9467/4067/54625/7075/5159/920/941/27/6886/2321/3082/4739/10019/5168/3643/3055/958/23529/9021/7039/3718/857/1956/3690/9052/3383/960/2039/8445/57091/3689/7070/84632/1839/1636/97…
GO:0022407	GO:0022407	regulation of cell-cell adhesion	327	-0.459506	-2.19761	1e-10	2.83487e-09	1.5428e-09	3043	tags=45%	list=20%	signal=37%	7292/57178/10808/912/4860/8440/7422/1948/928/3659/51043/1540/135/3620/25/10875/5465/5970/5788/29126/182/23075/384/3956/10725/9655/3485/7124/283234/975/79414/387/2113/3654/916/338879/8764/84868/9647/3037/9314/3071/7409/11314/3557/9308/64127/1845/5063/84807/80381/54440/3586/3606/5592/11006/3707/84959/5724/9402/301/9750/81704/26191/10457/5420/10673/55824/1840/2615/83706/11221/84433/1803/4067/91663/1…
GO:0022409	GO:0022409	positive regulation of cell-cell adhesion	208	-0.504007	-2.30704	1e-10	2.83487e-09	1.5428e-09	2580	tags=43%	list=17%	signal=36%	5788/29126/3956/10725/9655/3485/7124/283234/975/387/2113/3654/916/338879/8764/84868/3037/3071/7409/9308/64127/5063/84807/80381/54440/3586/3606/11006/3707/5724/9402/301/81704/5420/10673/11221/84433/1803/4067/10272/1604/3553/8613/5295/10370/920/941/114548/10859/604/861/3965/942/3115/6347/4092/199/10288/3133/9780/8744/8728/3718/857/3109/64926/3383/960/2039/3113/3559/8013/1960/3689/140885/7070/80380/…
GO:0030099	GO:0030099	myeloid cell differentiation	333	-0.473689	-2.2735	1e-10	2.83487e-09	1.5428e-09	2570	tags=34%	list=17%	signal=29%	6422/3394/182/567/3303/1777/133522/7124/22904/975/2113/84456/10519/8444/10538/10221/9948/1880/115727/192670/863/79705/6774/51341/3071/140685/55553/5916/760/11025/11006/3707/3589/84959/6722/4792/3059/7030/2353/5293/1969/23210/5371/4055/4318/4067/10272/9935/1028/2207/5153/23601/4627/5295/920/126014/6886/10320/1051/6777/10859/10019/677/604/10234/861/10312/302/1441/6688/1435/10398/146433/7097/3635/96…
GO:0030198	GO:0030198	extracellular matrix organization	308	-0.594284	-2.83424	1e-10	2.83487e-09	1.5428e-09	2189	tags=49%	list=14%	signal=43%	83700/3914/25890/5768/8985/8516/1471/7982/284217/3037/3688/23187/3384/79709/2683/1293/6624/5650/1284/64094/3038/30008/3685/26585/323/1514/56999/8434/150356/1520/3684/10319/79148/5351/7177/2621/5175/4318/1803/3910/28984/2247/10631/6696/3908/3339/133584/1282/176/4320/302/649/3693/90102/8728/7077/9644/3690/2200/4323/3383/960/2022/7133/2335/1291/4629/1545/84168/2192/11096/3689/3680/871/1462/50509/337…
GO:0030199	GO:0030199	collagen fibril organization	49	-0.767808	-2.82523	1e-10	2.83487e-09	1.5428e-09	939	tags=61%	list=6%	signal=58%	26585/150356/5351/176/4320/302/1545/871/50509/9509/84171/5352/2331/1311/4017/165/4060/1281/4921/1289/1277/11117/1278/7373/7046/1290/4015/1303/1301/6423
GO:0030278	GO:0030278	regulation of ossification	162	-0.514665	-2.28839	1e-10	2.83487e-09	1.5428e-09	2031	tags=33%	list=13%	signal=29%	10140/8519/51564/6497/9464/57154/9260/26585/91461/5552/5587/56172/5027/7291/4054/3727/23051/1901/22856/3082/1051/10312/1435/596/9770/1230/3399/144347/4256/115908/1052/652/359845/1959/1893/2737/1311/6348/255743/7043/4921/338773/9249/4038/2824/8840/3479/3491/860/5764/5167/3569/6423
GO:0030335	GO:0030335	positive regulation of cell migration	453	-0.5017	-2.46533	1e-10	2.83487e-09	1.5428e-09	2607	tags=42%	list=17%	signal=35%	83692/2852/7423/8874/5788/29126/389/3687/4215/23075/2771/1793/728/7124/8717/387/2113/2260/10519/3315/10509/8828/5581/153090/2896/8764/3611/81/9734/7114/9647/4267/6774/64218/8754/9732/51564/3037/3688/3071/2159/4249/1902/5063/7010/57007/406913/6810/56920/64094/5641/4846/2316/3685/6405/5724/6386/10769/9037/301/5293/284/9750/81704/57608/10457/50507/5587/5606/8829/5979/5420/9922/8660/2621/83706/5175/4…
GO:0030336	GO:0030336	negative regulation of cell migration	238	-0.509435	-2.3666	1e-10	2.83487e-09	1.5428e-09	3014	tags=45%	list=20%	signal=36%	57826/54567/6237/29/7076/5911/5176/51378/90865/9368/5912/25932/23189/100126315/57522/6422/182/51466/56833/574506/387/89795/153090/406943/10221/5793/3611/5467/27202/1809/6774/8519/22846/11057/5797/9314/11314/9863/9289/161742/1845/7414/5592/26585/6722/56999/397/9750/4070/8434/5365/6672/79148/6781/6915/11221/22998/28984/7168/388/2247/247/7075/10370/3486/89927/6091/6347/4092/131450/199/79812/285/596/…
GO:0030595	GO:0030595	leukocyte chemotaxis	159	-0.561757	-2.49459	1e-10	2.83487e-09	1.5428e-09	2423	tags=45%	list=16%	signal=39%	728/56833/1113/8729/51119/3269/80024/83700/2920/1880/5142/27202/3071/7409/3557/683/3586/5641/26585/1130/301/5293/3603/9750/79148/2621/1910/30817/4067/7984/3553/120425/1901/4354/2207/1240/2321/9420/3965/6347/199/6279/1441/1435/2921/7857/59341/1230/8792/719/3689/6351/3680/1843/5228/7424/8291/7226/972/5155/6348/6349/6280/4681/9547/5919/9353/5054/6387/5764/7057/3569
GO:0031589	GO:0031589	cell-substrate adhesion	314	-0.518248	-2.47451	1e-10	2.83487e-09	1.5428e-09	2595	tags=42%	list=17%	signal=36%	3913/8874/6422/10109/182/3956/3679/1793/81792/574506/201294/387/916/10519/3683/5581/23499/8324/83700/59339/3611/3914/25890/81/5467/8516/9647/8754/3037/3688/1845/683/7010/558/79834/7414/64094/2316/3685/6722/126147/56999/284/4070/8322/8829/5829/10319/2621/10174/948/83706/3987/5175/7791/22998/91663/51330/64005/10631/5295/55679/4739/3339/604/133584/10391/64098/79812/285/1435/55742/3693/596/90102/1097…
GO:0032102	GO:0032102	negative regulation of response to external stimulus	305	-0.447387	-2.13844	1e-10	2.83487e-09	1.5428e-09	2727	tags=39%	list=18%	signal=33%	10875/5465/10225/89790/215/22876/2852/5788/384/9655/56833/6397/7349/58529/79132/2113/6092/3949/2902/10509/7132/10221/2896/114132/3134/5467/27202/84868/2876/1026/64218/55198/113/114769/4790/9314/10475/10203/1845/7010/3586/406913/56920/5592/4846/26585/84959/6405/51738/9037/23621/7128/9572/8829/79148/58189/11221/2247/54625/6696/114548/3082/114899/10859/10019/3965/6091/6347/114897/131450/199/302/8530…
GO:0032496	GO:0032496	response to lipopolysaccharide	250	-0.477664	-2.23728	1e-10	2.83487e-09	1.5428e-09	3091	tags=46%	list=20%	signal=37%	6714/117854/79155/7292/210/55970/29/1312/488/133/1234/23641/148022/3620/25/10225/5970/57048/29126/3394/25819/353376/728/7124/22904/387/3654/9261/5581/153090/824/10221/5336/2920/5142/5467/84868/8754/3595/114769/4790/834/3557/64127/4129/968/558/259230/3586/3606/4846/5724/129607/4792/7128/2353/9572/3587/26191/3656/1439/6915/5027/948/1910/11221/4067/1604/3553/3727/941/23643/114548/445/1051/10859/3965…
GO:0032635	GO:0032635	interleukin-6 production	119	-0.566735	-2.4181	1e-10	2.83487e-09	1.5428e-09	2637	tags=47%	list=17%	signal=39%	84818/4615/9655/7124/7349/9261/26137/824/27202/84868/6774/3071/3557/64127/23208/3586/3606/1535/5724/51738/7128/64170/26191/5027/2621/948/7291/3553/4155/2207/3082/114899/1051/3965/113277/131450/199/10288/7097/3635/64581/59341/80149/7305/338382/7098/11213/7099/140885/84632/7096/972/51284/10365/54209/3569
GO:0032943	GO:0032943	mononuclear cell proliferation	204	-0.490609	-2.24364	1e-10	2.83487e-09	1.5428e-09	2580	tags=41%	list=17%	signal=34%	5788/29126/384/3485/283234/975/11119/916/8764/1880/933/84868/1026/695/196/4478/3071/11314/3614/57630/2000/683/80381/54440/3586/3606/202309/301/81704/26191/10457/10673/8660/5027/2615/11035/84433/4067/1604/3553/5699/920/941/1051/10859/604/3965/7940/942/3115/199/10288/958/3133/1435/596/23529/8744/3635/3718/3109/1794/6556/7305/64926/7133/3113/2213/3559/7099/80380/30835/1636/972/64115/652/7048/4332/94…
GO:0032944	GO:0032944	regulation of mononuclear cell proliferation	160	-0.520086	-2.31272	1e-10	2.83487e-09	1.5428e-09	2580	tags=45%	list=17%	signal=38%	5788/29126/384/3485/283234/975/916/8764/1880/933/84868/1026/695/196/3071/11314/57630/683/80381/54440/3586/3606/301/26191/10457/10673/8660/2615/11035/84433/4067/1604/3553/920/941/1051/10859/604/3965/7940/942/3115/199/10288/958/3133/1435/596/23529/8744/3635/3718/3109/7305/64926/7133/3113/2213/3559/7099/80380/30835/972/64115/652/7048/4332/940/11326/3479/4773/3569
GO:0032963	GO:0032963	collagen metabolic process	91	-0.626035	-2.55482	1e-10	2.83487e-09	1.5428e-09	2128	tags=51%	list=14%	signal=44%	5467/8985/1471/9902/3688/64175/9697/1514/1520/79148/5351/1508/5027/4318/28984/5159/4320/7431/4323/2022/407000/871/4261/9509/1513/64115/652/1306/8510/5352/57333/114757/7043/54206/90993/2191/4312/4327/1490/1289/1277/11117/1278/4239/4313/3569
GO:0032970	GO:0032970	regulation of actin filament-based process	342	-0.415714	-1.99747	1e-10	2.83487e-09	1.5428e-09	2663	tags=34%	list=17%	signal=29%	55114/653857/23189/6422/389/10109/57822/23075/7408/51466/387/122786/5581/85358/832/391/83700/3611/9948/5142/11344/80206/7114/9647/10095/3071/7454/55243/1902/116985/10458/5063/683/51332/7010/9886/9535/6624/10435/55616/128272/2316/3059/9037/50944/397/4070/50507/8829/9912/5829/6781/23433/29767/10174/22998/91663/7984/28984/1265/7168/2702/388/22836/1901/171024/5159/4627/57731/390/5295/27/8477/58480/14…
GO:0033045	GO:0033045	regulation of sister chromatid segregation	77	0.651266	2.54649	1e-10	2.83487e-09	1.5428e-09	1292	tags=38%	list=8%	signal=35%	891/7272/9787/991/9232/9212/701/9700/699/113130/990/1062/5347/10403/84101/9319/26271/4085/2237/54908/1063/116028/81620/7517/10460/84250/1663/8313/10459
GO:0033260	GO:0033260	nuclear DNA replication	59	0.674087	2.48281	1e-10	2.83487e-09	1.5428e-09	2761	tags=66%	list=18%	signal=54%	8318/9837/4173/51053/2237/5983/79915/4171/5888/8317/10926/5984/5427/4174/81620/3978/4172/5985/5557/5111/6119/675/4176/5426/23649/11200/5424/5982/5425/1763/5558/58525/29980/80174/10714/54962/54617/5422/23595
GO:0034341	GO:0034341	response to interferon-gamma	163	-0.560082	-2.50107	1e-10	2.83487e-09	1.5428e-09	2227	tags=40%	list=15%	signal=34%	1612/55647/3134/4939/53840/10346/3117/8519/834/7454/3106/10475/4940/10435/3663/6810/3105/2635/5724/83666/3107/3120/6672/5371/81603/7791/54625/55614/445/3965/3055/3115/6347/199/3133/4938/9021/7431/7097/6556/10410/3383/960/338382/3113/7098/3127/3119/3122/7099/684/6351/2634/140885/2934/84166/4261/3123/10581/6348/6349/2210/4360/2633/2209
GO:0034508	GO:0034508	centromere complex assembly	40	0.753081	2.57269	1e-10	2.83487e-09	1.5428e-09	2191	tags=60%	list=14%	signal=52%	11339/55355/57082/1058/79682/1062/79019/79172/64105/64946/1063/54069/2491/3070/387103/55839/91687/55166/201161/378708/4678/8607/79003/55320
GO:0036230	GO:0036230	granulocyte activation	438	-0.387622	-1.89831	1e-10	2.83487e-09	1.5428e-09	2546	tags=30%	list=17%	signal=26%	3687/567/3303/4758/51816/353376/728/4125/9725/1675/55276/201294/387/3683/535/976/100049587/8987/81567/6515/391/2548/2896/3310/51411/966/5768/47/4973/1992/1471/5476/1774/230/25798/4790/3071/84329/374403/11314/3614/4126/2683/683/56729/9535/968/7414/5660/6810/3606/5873/11025/1535/6793/3685/5724/6386/3101/84766/2512/4033/84514/10493/1520/3684/5337/1508/6518/64333/963/948/5175/6402/4318/26578/80301/16…
GO:0040013	GO:0040013	negative regulation of locomotion	278	-0.476806	-2.25723	1e-10	2.83487e-09	1.5428e-09	2579	tags=44%	list=17%	signal=37%	57826/54567/6237/29/7076/5911/5176/51378/90865/9368/135/5912/25932/23189/100126315/57522/6422/182/51466/56833/574506/387/6092/89795/10509/153090/406943/10221/5793/3611/5467/27202/1809/6774/64218/8519/22846/11057/5797/9314/7454/11314/9863/9289/161742/1845/7414/56920/5592/26585/6405/6722/51738/9037/56999/397/9750/4070/8829/8434/5365/6672/79148/6781/6915/11221/22998/28984/7168/388/2247/247/7075/1037…
GO:0040017	GO:0040017	positive regulation of locomotion	481	-0.48953	-2.41865	1e-10	2.83487e-09	1.5428e-09	2607	tags=41%	list=17%	signal=35%	83692/2852/7423/8874/5788/29126/389/3687/4215/23075/2771/1793/728/7124/8717/387/2113/2260/10519/3315/10509/8828/5581/153090/2896/338879/8764/3611/53905/81/9734/7114/9647/4267/6774/64218/8754/9732/51564/3037/3688/3071/2159/4249/1902/5063/7010/57007/406913/6810/56920/64094/5641/4846/2316/3685/6405/5724/6386/10769/9037/301/5293/284/3603/9750/81704/57608/10457/50507/5587/5606/8829/5979/5420/9922/8660…
GO:0042060	GO:0042060	wound healing	438	-0.449905	-2.20333	1e-10	2.83487e-09	1.5428e-09	2296	tags=34%	list=15%	signal=30%	58529/387/2113/3315/5738/5581/2776/832/23499/8324/2004/5336/3611/53905/966/8858/5467/2876/2157/1026/7454/7409/2159/4855/2683/23208/953/6382/558/5339/9066/7414/128272/5592/5873/64094/4846/825/2316/84959/6722/7128/301/7094/81704/3709/10077/6915/5027/2621/58189/948/83706/5175/11221/23533/4067/51330/50506/120425/7168/2247/9002/8613/4162/2207/10631/5159/4627/5295/3048/10019/10404/2828/5359/114897/6279…
GO:0042110	GO:0042110	T cell activation	371	-0.463217	-2.24514	1e-10	2.83487e-09	1.5428e-09	2520	tags=37%	list=16%	signal=32%	5788/29126/567/384/3956/602/9655/3485/283234/975/11119/387/91543/916/3683/8324/10538/8764/1880/84868/60437/6774/64218/115004/4478/3071/7454/7409/11314/9308/57630/64127/1845/2000/5063/84807/80381/54440/3586/3606/5873/11006/3707/6722/9402/678/56603/301/5293/9750/81704/26191/10457/10673/55824/1840/23210/5027/2615/9580/11221/11035/84433/1803/4067/1604/3553/9935/120425/5699/2207/4627/5295/920/941/1145…
GO:0042116	GO:0042116	macrophage activation	77	-0.679284	-2.70588	1e-10	2.83487e-09	1.5428e-09	2423	tags=55%	list=16%	signal=46%	728/7124/22904/3949/5581/2896/1191/84868/399687/7442/3586/9572/3684/23210/9173/8877/113277/6542/199/8530/10135/7097/6556/80149/7305/2213/7098/7099/3689/8291/7096/972/51284/22918/6348/712/3725/3566/54209/11326/7057/3569
GO:0043062	GO:0043062	extracellular structure organization	309	-0.593332	-2.82648	1e-10	2.83487e-09	1.5428e-09	2189	tags=49%	list=14%	signal=43%	83700/3914/25890/5768/8985/8516/1471/7982/284217/3037/3688/23187/3384/79709/2683/1293/6624/5650/1284/64094/3038/30008/3685/26585/323/1514/56999/8434/150356/1520/3684/10319/79148/5351/7177/2621/5175/4318/1803/3910/28984/2247/10631/6696/3908/3339/133584/1282/176/4320/302/649/3693/90102/8728/7077/9644/3690/2200/4323/3383/960/2022/7133/2335/1291/4629/1545/84168/2192/11096/3689/3680/871/1462/50509/337…
GO:0043299	GO:0043299	leukocyte degranulation	463	-0.394049	-1.94173	1e-10	2.83487e-09	1.5428e-09	2546	tags=31%	list=17%	signal=27%	3687/567/3303/4758/51816/353376/728/1113/4125/9725/1675/55276/201294/387/3683/535/976/100049587/8987/81567/6515/391/2548/2896/3310/51411/966/3134/5768/47/4973/1992/1471/695/5476/1774/7462/230/25798/4790/3071/84329/374403/11314/3614/4126/2683/683/56729/9535/968/6284/7414/5660/6810/5873/11025/1535/6793/3685/5724/6386/3101/84766/5293/2512/4033/84514/10493/1520/3684/5337/1508/6518/64333/963/948/5175/…
GO:0043410	GO:0043410	positive regulation of MAPK cascade	429	-0.399562	-1.95629	1e-10	2.83487e-09	1.5428e-09	2522	tags=32%	list=16%	signal=27%	4215/7316/8682/9500/2771/2914/728/7124/975/2260/3654/1848/9261/10519/5581/153090/8324/10550/3611/1880/27202/84868/9064/8754/858/1847/23043/197259/1849/3557/57630/64127/9464/1902/5063/7010/6464/57007/406913/5660/3356/3589/6386/51738/284/64170/26191/57608/10457/3656/8322/50507/5606/8829/5979/5027/9294/57161/2621/10174/9020/948/29969/4055/23533/221472/2246/7984/3553/2247/5159/920/3486/2321/3082/8877…
GO:0043542	GO:0043542	endothelial cell migration	198	-0.561242	-2.55995	1e-10	2.83487e-09	1.5428e-09	2407	tags=44%	list=16%	signal=38%	574506/387/2113/2260/10519/3315/8828/153090/406943/2896/57449/9734/2876/7114/64218/22846/51564/6273/5797/3688/9314/161742/7010/406913/64094/5641/4846/26585/6722/10769/9037/301/56999/284/57608/5587/5606/8829/1969/5829/6672/6781/6915/5175/1803/2246/28984/388/2247/8613/161198/4627/9564/6091/3164/23328/958/79812/285/57381/7857/3690/80149/6776/84913/1545/1012/1960/3689/25960/23129/94/7424/27286/6678/8…
GO:0044786	GO:0044786	cell cycle DNA replication	70	0.657492	2.52588	1e-10	2.83487e-09	1.5428e-09	2761	tags=61%	list=18%	signal=51%	8318/144455/9837/4173/79733/26271/51053/2237/5983/79915/4171/5888/8317/10926/5984/5427/4174/81620/2956/3978/4172/5985/5557/5111/6119/675/4176/5426/23649/11200/5424/5982/5425/1763/5558/58525/29980/80174/10714/54962/54617/5422/23595
GO:0045765	GO:0045765	regulation of angiogenesis	257	-0.545212	-2.55878	1e-10	2.83487e-09	1.5428e-09	2596	tags=44%	list=17%	signal=37%	10266/7423/6422/3687/4215/728/574506/387/2113/10519/3315/406919/153090/2896/9734/6774/64218/64855/22846/51564/5797/3688/9314/161742/7010/3586/406913/1284/64094/4846/3087/10769/4804/51738/9037/7128/301/56999/57608/10457/5587/8829/8434/1969/6672/6915/5371/7291/2246/51330/28984/3553/388/2247/7075/641700/2321/3082/8877/1512/3339/5168/10411/861/2828/718/4303/23328/958/79812/285/57381/80149/187/2022/40…
GO:0045766	GO:0045766	positive regulation of angiogenesis	148	-0.591798	-2.61819	1e-10	2.83487e-09	1.5428e-09	2596	tags=49%	list=17%	signal=41%	10266/7423/3687/4215/728/574506/2113/10519/3315/406919/2896/9734/6774/51564/3688/9314/7010/3586/406913/64094/4846/10769/51738/9037/301/57608/5587/8829/6915/7291/2246/3553/388/2247/7075/2321/3082/8877/1512/10411/861/718/23328/958/285/57381/80149/187/2022/406890/7098/1545/719/947/3689/1536/5228/1003/94/7424/27286/8742/8038/7048/1893/3678/5740/5054/5743/2152/126393/7057/6423
GO:0045785	GO:0045785	positive regulation of cell adhesion	340	-0.491472	-2.3587	1e-10	2.83487e-09	1.5428e-09	2583	tags=42%	list=17%	signal=36%	8874/5788/6422/29126/10109/3956/10725/1793/9655/3485/7124/283234/975/201294/387/2113/3654/916/10519/5581/338879/8764/59339/3611/25890/84868/9647/8754/3037/3071/7409/9308/64127/9289/5063/7010/84807/80381/54440/3586/6810/3606/64094/2316/11006/3707/3685/5724/9402/7030/301/284/81704/8829/5979/5420/10673/948/3987/11221/84433/1803/4067/91663/10272/1604/3553/7168/8613/5295/10370/920/941/114548/55679/473…
GO:0046651	GO:0046651	lymphocyte proliferation	202	-0.483563	-2.20801	1e-10	2.83487e-09	1.5428e-09	2580	tags=40%	list=17%	signal=34%	5788/29126/384/3485/283234/975/11119/916/8764/1880/933/84868/1026/695/196/4478/3071/11314/3614/57630/2000/683/80381/54440/3586/3606/202309/301/81704/26191/10457/10673/8660/5027/2615/11035/84433/4067/1604/3553/5699/920/941/1051/10859/604/3965/7940/942/3115/199/10288/958/3133/596/23529/8744/3635/3718/3109/1794/6556/7305/64926/7133/3113/2213/3559/7099/80380/30835/972/64115/652/7048/4332/940/11326/34…
GO:0048285	GO:0048285	organelle fission	393	0.511919	2.5163	1e-10	2.83487e-09	1.5428e-09	2083	tags=34%	list=14%	signal=30%	891/83540/11065/7272/9787/3833/991/332/51203/7153/9232/9088/995/81930/54443/259266/9212/64151/23397/701/11130/8438/22974/146909/9134/9928/11004/6790/9700/699/113130/990/1164/55143/4605/1111/84072/1062/24137/29127/3832/5347/9055/10403/151648/10615/4288/84101/9585/64105/64180/9319/26271/4085/4603/146956/54908/1063/10592/84057/83990/79075/63979/29893/9493/3835/91646/5888/90417/55706/9918/64793/4751/…
GO:0048660	GO:0048660	regulation of smooth muscle cell proliferation	130	-0.557541	-2.40117	1e-10	2.83487e-09	1.5428e-09	2603	tags=42%	list=17%	signal=35%	2852/100126315/2771/7124/574506/3654/406919/10221/3611/5467/4209/1026/9314/10203/3586/3606/5592/1535/5724/7128/4318/7168/2247/1901/10257/5159/3486/199/10135/693223/4854/5136/1956/5739/8013/1012/1839/652/7048/5155/9510/7043/80310/3725/2006/407006/8862/8840/6934/3479/5743/1264/7057/4313/3569
GO:0050670	GO:0050670	regulation of lymphocyte proliferation	159	-0.516766	-2.2948	1e-10	2.83487e-09	1.5428e-09	2580	tags=52%	list=17%	signal=44%	7040/8767/5074/7292/2323/912/4860/8440/3659/51043/148022/3620/5788/29126/384/3485/283234/975/916/8764/1880/933/84868/1026/695/196/3071/11314/57630/683/80381/54440/3586/3606/301/26191/10457/10673/8660/2615/11035/84433/4067/1604/3553/920/941/1051/10859/604/3965/7940/942/3115/199/10288/958/3133/596/23529/8744/3635/3718/3109/7305/64926/7133/3113/2213/3559/7099/80380/30835/972/64115/652/7048/4332/940/…
GO:0050673	GO:0050673	epithelial cell proliferation	332	-0.470002	-2.25705	1e-10	2.83487e-09	1.5428e-09	2273	tags=32%	list=15%	signal=28%	8828/406919/153090/8324/406943/2896/5467/27202/2876/1992/6774/22846/858/5797/3037/2683/64127/7010/3586/406913/1535/4804/51738/9037/7128/9572/9788/4070/57608/5587/8854/8829/1969/5365/58189/7291/1910/11221/687/2246/28984/1028/120425/2247/3486/2321/3082/55679/1051/9420/677/6091/3164/6347/2099/51162/7039/857/7857/1956/3690/4323/26471/187/6776/8013/84913/1012/4609/947/1960/11202/5228/94/7424/8291/6678…
GO:0050678	GO:0050678	regulation of epithelial cell proliferation	286	-0.462738	-2.18982	1e-10	2.83487e-09	1.5428e-09	2423	tags=34%	list=16%	signal=29%	728/7124/574506/2260/8828/406919/153090/8324/406943/2896/5467/27202/2876/6774/22846/858/5797/3037/2683/64127/7010/3586/406913/1535/4804/51738/9037/7128/9572/9788/4070/57608/5587/8854/8829/5365/58189/7291/1910/11221/687/2246/28984/1028/120425/2247/2321/55679/9420/677/6091/3164/6347/51162/7039/857/7857/1956/3690/26471/187/6776/8013/84913/1012/4609/1960/5228/94/7424/8291/6678/3912/8742/23213/652/515…
GO:0050679	GO:0050679	positive regulation of epithelial cell proliferation	161	-0.526395	-2.33718	1e-10	2.83487e-09	1.5428e-09	2423	tags=38%	list=16%	signal=32%	728/574506/2260/8828/406919/8324/2896/27202/6774/858/3037/2683/64127/7010/3586/406913/1535/51738/9037/7128/57608/5587/8829/5365/7291/2246/120425/2247/9420/3164/51162/7039/7857/1956/3690/187/6776/8013/1012/4609/1960/5228/94/7424/8291/3912/8742/652/5155/1893/3725/6608/7046/8862/6934/3479/6387/2152/5654/5764/2252
GO:0050727	GO:0050727	regulation of inflammatory response	265	-0.509567	-2.4099	1e-10	2.83487e-09	1.5428e-09	2905	tags=45%	list=19%	signal=37%	5176/197358/90865/148022/1540/135/3620/5138/7052/5465/11274/89790/5970/215/84818/4615/2852/5788/9655/56833/7124/22904/81792/975/8717/5187/2113/3949/7132/2896/5467/2876/7114/695/55198/113/4790/9314/11343/64127/10203/683/7010/3586/406913/3606/4792/51738/7128/9572/301/58189/1910/7791/11221/4318/4067/283131/3553/118788/2207/9173/114548/3082/114899/8877/1051/604/3055/718/80709/6542/131450/6279/8530/22…
GO:0050863	GO:0050863	regulation of T cell activation	251	-0.482217	-2.26498	1e-10	2.83487e-09	1.5428e-09	1927	tags=33%	list=13%	signal=30%	3071/7409/11314/9308/57630/64127/1845/5063/84807/80381/54440/3586/3606/11006/3707/9402/56603/301/9750/81704/26191/10457/10673/55824/1840/2615/9580/11221/11035/84433/1803/4067/1604/3553/5295/920/941/114548/1051/10859/604/861/3965/942/3115/6347/6935/4092/199/10288/3133/8744/3718/857/3109/3111/80149/64926/7133/3113/2213/3559/79626/1960/140885/7070/80380/30835/2934/972/64115/652/7048/2737/1326/3077/3…
GO:0050865	GO:0050865	regulation of cell activation	438	-0.464073	-2.27272	1e-10	2.83487e-09	1.5428e-09	2603	tags=38%	list=17%	signal=33%	2852/5788/6422/29126/384/3956/9655/3485/56833/283234/975/201294/387/200558/916/3949/2896/8764/1880/3134/933/84868/1026/695/115004/196/3071/399687/7409/11314/9308/57630/64127/1845/286410/5063/683/558/84807/80381/54440/3586/6810/3606/5592/4846/825/11006/3707/84959/5724/9402/678/7128/56603/9572/301/9750/81704/26191/10457/3684/10673/55824/1840/10077/8660/64092/2615/2621/9580/11221/11035/84433/1803/30…
GO:0050866	GO:0050866	negative regulation of cell activation	154	-0.540512	-2.40182	1e-10	2.83487e-09	1.5428e-09	2965	tags=50%	list=19%	signal=41%	29/928/3659/51043/135/3620/10875/2852/5788/6422/29126/384/9655/3949/2896/8764/3134/84868/695/11314/1845/558/84807/3586/5592/4846/84959/7128/9572/301/9750/26191/10457/55824/1840/10077/64092/2615/4067/146722/941/1051/10859/10019/604/861/3965/7940/942/114897/4092/10288/8530/3635/8832/3718/80149/7305/2213/3559/79626/80380/7056/972/64115/5156/652/5155/2737/114757/4332/3077/5270/3566/3624/11117/11326
GO:0050867	GO:0050867	positive regulation of cell activation	261	-0.494406	-2.32396	1e-10	2.83487e-09	1.5428e-09	2192	tags=36%	list=14%	signal=32%	8764/1880/3134/84868/1026/695/3071/7409/9308/64127/286410/5063/683/558/84807/80381/54440/3586/6810/3606/825/11006/3707/5724/9402/301/81704/3684/10673/8660/2621/11221/84433/1803/4067/1604/3553/2207/5159/9173/5295/920/941/114548/10859/604/861/3965/942/3115/6347/199/10288/958/8741/3133/596/23529/8744/3635/3718/857/3109/64581/7305/64926/4323/5341/2039/3113/3559/8013/1960/7099/3689/140885/7070/80380/3…
GO:0050900	GO:0050900	leukocyte migration	334	-0.527036	-2.51903	1e-10	2.83487e-09	1.5428e-09	2423	tags=42%	list=16%	signal=36%	728/56833/7124/1113/975/387/8729/2817/51119/3683/2734/3269/80024/8764/83700/2920/9948/1880/5142/9057/27202/4973/4267/4478/3688/3071/7409/11314/3557/2650/2683/683/7010/6382/6464/3586/5641/6793/3685/26585/5724/1130/301/5293/284/3603/9750/81704/5979/3684/6404/79148/2621/5175/6402/90952/1910/11035/30817/4067/7984/3553/120425/1901/64005/4354/2207/4627/5295/1240/2321/9420/3965/3055/2059/6347/131450/199…
GO:0050920	GO:0050920	regulation of chemotaxis	174	-0.515131	-2.31504	1e-10	2.83487e-09	1.5428e-09	2423	tags=44%	list=16%	signal=37%	728/56833/2260/6092/3315/10509/80024/83700/1880/27202/7114/9647/64218/3071/1902/1845/683/6810/56920/64094/5641/26585/6405/9037/3603/9750/5587/8829/79148/2621/65249/4067/2246/2247/1901/4354/5159/1240/3965/6091/6347/199/285/54437/1435/7857/59341/1230/10501/223117/719/1012/6351/25960/1843/5228/55079/7424/8291/8482/972/5156/5155/6348/80310/4681/54209/9547/5919/9353/5054/6387/2152/5764/7057/3569
GO:0051216	GO:0051216	cartilage development	171	-0.53031	-2.38401	1e-10	2.83487e-09	1.5428e-09	1812	tags=38%	list=12%	signal=34%	55553/9464/5916/1293/26585/6722/91461/51738/150356/6781/64764/4054/2247/22856/579/5744/4487/4094/176/6935/302/649/51435/59341/960/2487/1291/871/353500/11173/94/144347/64856/1292/4256/85301/50515/1513/7045/23213/652/359845/7048/1893/2737/55959/1311/4920/6615/4017/4060/2121/1490/1277/7373/3200/7046/2202/8840/3491/860/4148/1303/1301/6423
GO:0051249	GO:0051249	regulation of lymphocyte activation	338	-0.447777	-2.14668	1e-10	2.83487e-09	1.5428e-09	2580	tags=38%	list=17%	signal=32%	5788/6422/29126/384/3956/9655/3485/56833/283234/975/387/200558/916/8764/1880/3134/933/84868/1026/695/115004/196/3071/7409/11314/9308/57630/64127/1845/286410/5063/683/558/84807/80381/54440/3586/3606/11006/3707/9402/678/7128/56603/301/9750/81704/26191/10457/10673/55824/1840/8660/64092/2615/2621/9580/11221/11035/84433/1803/4067/1604/3553/5295/920/941/114548/1051/10859/677/604/861/3965/7940/942/3115/…
GO:0051251	GO:0051251	positive regulation of lymphocyte activation	219	-0.48592	-2.23157	1e-10	2.83487e-09	1.5428e-09	3054	tags=46%	list=20%	signal=37%	79155/7292/2323/57178/10808/912/4860/8440/1948/51043/148022/1540/54537/5788/29126/3956/9655/3485/283234/975/387/916/8764/1880/3134/84868/1026/695/3071/7409/9308/64127/286410/5063/683/558/84807/80381/54440/3606/11006/3707/9402/301/81704/10673/8660/2621/11221/84433/1803/4067/1604/3553/5295/920/941/114548/10859/604/861/3965/942/3115/6347/199/10288/958/8741/3133/596/23529/8744/3635/3718/857/3109/6458…
GO:0051271	GO:0051271	negative regulation of cellular component movement	281	-0.476462	-2.25524	1e-10	2.83487e-09	1.5428e-09	2579	tags=38%	list=17%	signal=33%	100126315/57522/6422/182/51466/56833/574506/387/89795/10509/153090/406943/10221/5793/3611/81/5467/27202/1809/6774/64218/8519/22846/11057/5797/9314/7454/11314/9863/9289/161742/1845/7414/56920/5592/26585/6405/6722/9037/56999/397/9750/4070/8829/8434/5365/6672/79148/6781/6915/11221/22998/28984/7168/388/2247/247/7075/10370/3486/89927/6091/6347/4092/131450/199/79812/285/54437/596/90102/693223/10501/202…
GO:0051272	GO:0051272	positive regulation of cellular component movement	482	-0.488994	-2.41704	1e-10	2.83487e-09	1.5428e-09	2607	tags=40%	list=17%	signal=35%	83692/2852/7423/8874/5788/29126/389/3687/4215/23075/2771/1793/728/7124/8717/387/2113/2260/10519/3315/10509/8828/5581/153090/2896/338879/8764/3611/53905/81/9734/7114/9647/4267/6774/64218/8754/9732/9638/51564/3037/3688/3071/2159/4249/1902/5063/7010/57007/406913/6810/56920/64094/5641/4846/2316/3685/6405/5724/6386/10769/9037/301/5293/284/9750/81704/57608/10457/50507/5587/5606/8829/5979/5420/9922/8660…
GO:0051304	GO:0051304	chromosome separation	83	0.621769	2.47446	1e-10	2.83487e-09	1.5428e-09	2140	tags=43%	list=14%	signal=38%	891/7272/9787/991/7153/9232/9212/23397/701/9700/699/990/1062/5347/10403/84101/9319/26271/4085/146956/54908/1063/9918/81620/7517/10460/23310/80010/10459/57697/378708/129563/8697/5885/7156/348654
GO:0051321	GO:0051321	meiotic cell cycle	194	0.530038	2.39167	1e-10	2.83487e-09	1.5428e-09	3558	tags=49%	list=23%	signal=38%	83540/7272/9156/991/7153/9232/9088/995/81930/259266/23397/701/8438/9134/6790/9700/699/1164/84072/5347/151648/993/64180/9319/26271/4603/146956/10592/84057/83990/63979/29893/4880/91646/5888/55706/9918/4751/2175/256126/151246/898/10051/2956/23236/347688/644186/23310/675/80010/57697/5810/7516/84930/378708/147872/114791/3306/7283/245711/284071/25788/5885/4439/285498/150365/5932/55329/7156/9985/1017/21…
GO:0051983	GO:0051983	regulation of chromosome segregation	98	0.665254	2.72333	1e-10	2.83487e-09	1.5428e-09	1292	tags=39%	list=8%	signal=36%	891/7272/9787/991/9232/9212/701/11004/9700/699/113130/990/84072/1062/29127/5347/10403/10615/4288/84101/9319/100533997/26271/4085/2237/54908/1894/1063/90417/116028/4751/81620/7517/10460/84250/1663/8313/10459
GO:0060326	GO:0060326	cell chemotaxis	219	-0.540052	-2.48016	1e-10	2.83487e-09	1.5428e-09	2423	tags=47%	list=16%	signal=40%	728/56833/1113/8729/2260/51119/3315/3269/80024/391/83700/57449/2920/1880/5142/51411/27202/7114/2829/9732/3071/2826/7409/3557/1902/683/57007/3586/64094/5641/26585/1130/9037/9034/301/5293/3603/9750/5587/8829/1969/5365/79148/2621/1910/30817/4067/2246/7984/3553/120425/2247/1901/4354/2207/5159/1240/2321/3082/9420/9564/3965/3164/6347/199/6279/1441/1435/55742/2921/7857/59341/1230/8792/719/1960/3689/6351…
GO:0060348	GO:0060348	bone development	179	-0.515257	-2.31933	1e-10	2.83487e-09	1.5428e-09	2113	tags=34%	list=14%	signal=30%	4882/4209/79705/3037/6497/64175/5916/1293/7010/26585/6722/51738/56603/6781/7291/4054/22856/6886/10859/10019/4487/10234/302/64131/51435/5358/59341/2200/7305/4323/6261/2022/1291/9060/871/144347/64856/1292/6678/85301/23213/652/359845/7048/2737/55959/1311/79633/7043/1277/7373/338773/9249/8840/3479/860/4015/6424/4148/1303/6423
GO:0061448	GO:0061448	connective tissue development	227	-0.525811	-2.42185	1e-10	2.83487e-09	1.5428e-09	1812	tags=36%	list=12%	signal=32%	55553/91252/9464/5916/1293/26585/23111/6722/91461/51738/11145/140606/150356/6781/64764/4054/2247/22856/5159/579/84159/5744/4487/2828/4094/176/6935/302/649/1435/51435/64641/59341/1958/960/2487/1291/947/871/353500/11173/94/144347/64856/1292/4256/85301/50515/1513/7045/23213/652/359845/7048/5155/1893/2737/55959/1311/59/4920/6615/4017/80310/4060/3400/2121/1490/1289/1277/7373/3200/7046/2202/8840/3491/8…
GO:0061572	GO:0061572	actin filament bundle organization	142	-0.533814	-2.33913	1e-10	2.83487e-09	1.5428e-09	2789	tags=47%	list=18%	signal=39%	25/11346/4082/221061/6422/389/23075/51466/134549/387/85358/81/9647/1809/7454/1902/116985/10458/6624/55616/2316/6722/25794/50944/4070/50507/8829/5829/221692/10174/85462/7791/22998/7984/28984/7168/388/1901/171024/390/5295/8477/4739/29109/10411/10391/2059/199/3693/90102/51474/5358/5341/22899/2039/79822/55160/144347/29984/359845/10395/87/7043/10580/2006/1490/7046
GO:0061982	GO:0061982	meiosis I cell cycle process	88	0.605869	2.44538	1e-10	2.83487e-09	1.5428e-09	3174	tags=56%	list=21%	signal=44%	7153/9232/995/8438/9134/6790/9700/1164/84072/5347/993/9319/26271/4603/146956/84057/83990/29893/5888/55706/256126/898/2956/644186/675/80010/57697/378708/147872/3306/284071/25788/5885/4439/285498/150365/9985/2177/201254/5889/79703/7155/11105/23353/29988/4361/10734/4437/84464
GO:0065004	GO:0065004	protein-DNA complex assembly	164	0.514088	2.29566	1e-10	2.83487e-09	1.5428e-09	4386	tags=47%	list=29%	signal=34%	11339/55355/8318/57082/55723/1058/79682/1062/79019/4173/79172/64105/64946/51053/1063/4171/54069/10036/4674/5888/7480/2491/3070/387103/3148/4174/81620/55839/4172/91687/6119/55166/4176/8208/201161/6662/378708/9014/2966/4678/8607/8520/79003/55320/6879/25842/142/201254/9330/23595/5928/55011/5893/6418/85453/3146/9978/1022/4175/54107/4676/5702/6117/6118/5931/55814/8554/54700/7157/8451/7013/6908/6597/57…
GO:0070661	GO:0070661	leukocyte proliferation	221	-0.497649	-2.28791	1e-10	2.83487e-09	1.5428e-09	2580	tags=42%	list=17%	signal=35%	5788/29126/384/3485/283234/975/11119/916/8764/1880/1191/933/84868/1026/695/196/4478/3071/11314/3614/57630/2000/683/80381/54440/3586/3606/202309/26585/3087/7128/301/81704/26191/10457/10673/8660/5027/2615/11035/84433/4067/1604/3553/5699/920/941/1051/10859/604/3965/7940/942/10312/3115/199/10288/958/3133/1435/596/146433/23529/8744/3635/3718/3109/1794/6556/7305/64926/7133/3113/2213/3559/7099/684/80380…
GO:0070663	GO:0070663	regulation of leukocyte proliferation	167	-0.521375	-2.32981	1e-10	2.83487e-09	1.5428e-09	2580	tags=46%	list=17%	signal=38%	5788/29126/384/3485/283234/975/916/8764/1880/933/84868/1026/695/196/3071/11314/57630/683/80381/54440/3586/3606/26585/3087/7128/301/26191/10457/10673/8660/2615/11035/84433/4067/1604/3553/920/941/1051/10859/604/3965/7940/942/3115/199/10288/958/3133/1435/596/23529/8744/3635/3718/3109/7305/64926/7133/3113/2213/3559/7099/684/80380/30835/972/64115/652/7048/4332/940/11326/3479/4773/3569
GO:0071103	GO:0071103	DNA conformation change	264	0.531862	2.47851	1e-10	2.83487e-09	1.5428e-09	4402	tags=49%	list=29%	signal=36%	641/891/11339/51203/7153/55355/64151/23397/8318/57082/8438/55723/1058/51659/983/113130/9837/79682/79019/9401/4173/79172/64105/64946/8091/10721/3149/84296/54892/5983/54821/80119/10592/4171/83990/79075/54069/10036/4674/5888/9918/2491/3070/387103/5984/3148/10051/4174/63922/55839/6732/84515/4172/5985/23310/57673/91687/1663/55166/4176/8208/1107/201161/165545/6662/26993/378708/146059/26155/2966/5982/25…
GO:0071216	GO:0071216	cellular response to biotic stimulus	182	-0.500906	-2.25263	1e-10	2.83487e-09	1.5428e-09	2857	tags=44%	list=19%	signal=36%	1234/23641/148022/25/5970/57048/29126/3394/353376/7124/22904/387/3654/5581/153090/824/10221/2920/5142/5467/84868/695/8754/114769/4790/834/3557/64127/968/558/259230/3586/3606/4846/5724/129607/4792/7128/9572/26191/3656/6915/948/1910/4067/1604/3553/941/23643/114548/445/1051/10859/3055/942/6347/10288/10628/23328/7431/2921/7097/64581/80149/3383/7133/2213/7099/140885/80380/57088/7096/9450/6348/929/7538…
GO:0071219	GO:0071219	cellular response to molecule of bacterial origin	159	-0.541656	-2.40533	1e-10	2.83487e-09	1.5428e-09	2857	tags=48%	list=19%	signal=40%	1234/23641/148022/25/5970/57048/29126/3394/353376/7124/22904/387/3654/5581/153090/824/10221/2920/5142/5467/84868/8754/114769/4790/834/3557/64127/968/558/259230/3586/3606/4846/5724/129607/4792/7128/9572/26191/3656/6915/948/1910/4067/1604/3553/941/23643/114548/445/1051/10859/3055/942/6347/10288/23328/7431/2921/7097/80149/3383/7133/2213/7099/140885/80380/57088/7096/9450/6348/929/7538/54209/4360/5054…
GO:0071222	GO:0071222	cellular response to lipopolysaccharide	152	-0.550393	-2.44218	1e-10	2.83487e-09	1.5428e-09	2857	tags=49%	list=19%	signal=40%	1234/23641/148022/25/5970/57048/29126/3394/353376/7124/22904/387/3654/5581/153090/824/10221/2920/5142/5467/84868/8754/114769/4790/834/3557/64127/968/558/259230/3586/3606/4846/5724/129607/4792/7128/9572/26191/3656/6915/948/1910/4067/1604/3553/941/23643/114548/445/1051/10859/3055/942/6347/10288/23328/7431/2921/7097/80149/3383/7133/7099/140885/80380/57088/9450/6348/929/7538/4360/5054/3569
GO:0071346	GO:0071346	cellular response to interferon-gamma	146	-0.553777	-2.44536	1e-10	2.83487e-09	1.5428e-09	2227	tags=41%	list=15%	signal=35%	1612/55647/3134/4939/53840/10346/3117/834/7454/3106/10475/4940/10435/3663/6810/3105/2635/5724/83666/3107/3120/6672/5371/81603/7791/54625/55614/445/3965/3055/3115/6347/199/3133/4938/9021/7431/7097/3383/960/338382/3113/7098/3127/3119/3122/7099/6351/2634/140885/2934/84166/4261/3123/6348/6349/2210/4360/2633/2209
GO:0071674	GO:0071674	mononuclear cell migration	60	-0.684583	-2.60468	1e-10	2.83487e-09	1.5428e-09	1643	tags=48%	list=11%	signal=43%	5641/26585/301/5175/4067/120425/1240/2321/6347/199/1435/59341/1230/8792/719/6351/1843/140885/5155/6348/80310/6349/4681/5919/9353/5054/6387/7057/3569
GO:0090130	GO:0090130	tissue migration	271	-0.506231	-2.39261	1e-10	2.83487e-09	1.5428e-09	2362	tags=42%	list=15%	signal=36%	4215/51466/1793/574506/387/2113/2260/10519/3315/8828/5581/153090/23499/406943/2896/5793/57449/5467/9734/2876/7114/9647/64218/8754/22846/51564/6273/5797/3037/3688/9314/161742/7010/406913/64094/5641/4846/26585/6722/10769/9037/301/56999/284/4070/57608/5587/5606/8829/1969/5829/6672/9922/6781/6915/5175/11221/4318/1803/2246/28984/388/2247/8613/161198/72/4627/1512/5168/9564/6091/3164/23328/958/79812/152…
GO:0090132	GO:0090132	epithelium migration	268	-0.505979	-2.39801	1e-10	2.83487e-09	1.5428e-09	2522	tags=42%	list=16%	signal=36%	4215/51466/1793/574506/387/2113/2260/10519/3315/8828/5581/153090/23499/406943/2896/5793/57449/5467/9734/2876/7114/9647/64218/8754/22846/51564/6273/5797/3037/3688/9314/161742/7010/406913/64094/5641/4846/26585/6722/10769/9037/301/56999/284/4070/57608/5587/5606/8829/1969/5829/6672/9922/6781/6915/5175/11221/4318/1803/2246/28984/388/2247/8613/161198/4627/1512/5168/9564/6091/3164/23328/958/79812/152007…
GO:0090287	GO:0090287	regulation of cellular response to growth factor stimulus	230	-0.487708	-2.25215	1e-10	2.83487e-09	1.5428e-09	2608	tags=39%	list=17%	signal=33%	283149/6422/5526/79176/3303/7316/81792/574506/2817/2260/2734/153090/3611/7041/8516/10140/51341/64855/858/64388/6497/8321/8425/57154/64094/26585/81848/23111/6386/3087/65997/57608/8322/94031/2246/10272/3553/1028/2247/114990/10370/79652/6498/2321/4487/11167/6091/6935/4092/79812/857/3690/2200/2022/406890/54829/27122/25960/1003/94/7424/10252/50515/55816/83891/23213/652/1601/7048/1634/55959/255743/7043…
GO:0097529	GO:0097529	myeloid leukocyte migration	147	-0.579019	-2.55871	1e-10	2.83487e-09	1.5428e-09	2637	tags=52%	list=17%	signal=43%	84818/83692/7423/23075/728/56833/1113/975/8729/3269/83700/2920/9948/5142/27202/4267/3071/7409/11314/3557/683/5641/26585/301/5293/9750/79148/5175/1910/30817/4067/7984/3553/120425/4354/2207/1240/2321/6347/131450/199/6279/1441/1435/2921/7857/59341/1230/4323/8792/719/3689/6351/3680/1843/5228/140885/7424/8291/972/3554/5155/4920/6348/80310/6349/6280/4681/11117/54209/5919/9353/5054/6387/7057/3569
GO:0098813	GO:0098813	nuclear chromosome segregation	230	0.596171	2.75421	1e-10	2.83487e-09	1.5428e-09	2017	tags=38%	list=13%	signal=33%	891/83540/7272/9787/3833/991/51203/7153/9232/81930/9212/64151/23397/701/11130/57082/146909/9134/9928/11004/9700/699/113130/990/55143/84072/1062/24137/29127/5347/9055/10403/151648/10615/84101/64105/9319/26271/81610/4085/146956/2237/54908/1894/1063/10592/83990/79075/9493/3835/90417/55706/9918/116028/4751/3619/157570/256126/151246/898/10051/81620/23212/7517/10460/644186/23310/84250/79980/54627/1663/…
GO:0140013	GO:0140013	meiotic nuclear division	132	0.583677	2.51105	1e-10	2.83487e-09	1.5428e-09	3174	tags=52%	list=21%	signal=41%	83540/7272/991/7153/9232/81930/259266/23397/701/8438/9134/6790/9700/699/1164/84072/5347/151648/64180/9319/26271/4603/146956/10592/84057/83990/63979/29893/91646/5888/55706/2175/256126/151246/898/10051/23236/347688/644186/675/80010/57697/5810/84930/378708/147872/3306/245711/284071/25788/5885/4439/285498/150365/9985/2177/201254/5889/79703/7155/11105/23353/29988/11022/4361/10734/4437/84464
GO:0140014	GO:0140014	mitotic nuclear division	251	0.5497	2.53944	1e-10	2.83487e-09	1.5428e-09	1888	tags=35%	list=12%	signal=31%	891/83540/11065/7272/9787/3833/991/332/51203/9232/9088/995/81930/54443/9212/64151/23397/701/11130/22974/146909/9928/11004/6790/9700/699/113130/990/55143/4605/1111/1062/24137/29127/3832/5347/9055/10403/151648/10615/4288/84101/9585/64105/9319/26271/4085/54908/1063/10592/79075/9493/3835/90417/9918/64793/4751/1906/27085/3619/27338/10051/81620/23212/655/3796/7517/10460/23310/79866/84250/79980/54627/44…
GO:0150076	GO:0150076	neuroinflammatory response	56	-0.721211	-2.72324	1e-10	2.83487e-09	1.5428e-09	2423	tags=62%	list=16%	signal=53%	728/7124/3949/107/2896/1191/7442/25825/3606/9572/3684/4318/3553/8877/131450/199/8530/10135/7097/1956/7305/26471/7133/7098/3689/51284/4035/6348/712/3725/6608/54209/3479/5743/3569
GO:1901342	GO:1901342	regulation of vasculature development	286	-0.529613	-2.50629	1e-10	2.83487e-09	1.5428e-09	2603	tags=42%	list=17%	signal=35%	2852/10266/7423/6422/3687/4215/728/574506/387/2113/10519/3315/406919/153090/2896/9734/6774/64218/64855/22846/51564/5797/3688/9314/161742/7010/3586/406913/1284/64094/4846/3087/10769/4804/51738/9037/7128/301/56999/57608/10457/5587/8829/8434/1969/6672/6915/5371/7291/2246/51330/28984/3553/388/2247/7075/641700/2321/3082/8877/1512/3339/5168/10411/861/2828/718/4303/23328/958/79812/285/57381/80149/1958/1…
GO:1902105	GO:1902105	regulation of leukocyte differentiation	222	-0.533003	-2.45219	1e-10	2.83487e-09	1.5428e-09	1927	tags=36%	list=13%	signal=32%	3071/140685/9308/57630/286410/558/84807/54440/3606/760/11025/11006/3707/84959/3059/7030/678/2353/56603/301/1840/2621/9580/11221/84433/4067/10272/9935/5295/920/941/6886/114548/55365/1051/10859/677/604/10234/861/3965/942/6935/4092/10288/1435/146433/8744/3635/3718/9770/3111/1230/80149/2200/7305/4323/28959/2213/3559/7098/4609/1960/7099/714/972/64115/652/7048/2737/4920/6348/3725/3566/940/3624/54209/13…
GO:1902532	GO:1902532	negative regulation of intracellular signal transduction	467	-0.380447	-1.87623	1e-10	2.83487e-09	1.5428e-09	2626	tags=29%	list=17%	signal=25%	23189/284996/154743/2852/4534/5788/6422/59338/5526/55841/9454/3303/2771/652968/10625/1850/6397/6609/574506/58529/5187/79132/387/1848/10519/8444/3315/153090/143872/1191/933/2876/7114/8996/5311/51564/1847/3688/9314/126374/2274/5470/1849/80014/5998/8531/11314/83892/9863/84952/57600/1902/161742/1845/57007/84807/5997/81848/10156/7128/9572/9750/26191/9912/1969/2122/200734/467/5027/55450/54922/6690/7291…
GO:1902850	GO:1902850	microtubule cytoskeleton organization involved in mitosis	127	0.582638	2.49359	1e-10	2.83487e-09	1.5428e-09	1882	tags=34%	list=12%	signal=30%	891/83540/7272/3833/991/332/51203/9212/22974/1058/6790/9700/4605/1062/24137/29127/3832/5347/9055/57405/10403/6491/3925/4085/54908/89958/9493/25886/284403/4751/79187/29899/3796/10460/79866/54627/440145/5080/8480/11200/7283/137886/55726
GO:1903037	GO:1903037	regulation of leukocyte cell-cell adhesion	243	-0.51184	-2.38446	1e-10	2.83487e-09	1.5428e-09	3178	tags=50%	list=21%	signal=40%	3676/7040/8767/5074/6714/7292/57178/10808/912/4860/8440/1948/3659/51043/1540/135/3620/10875/5465/5970/5788/29126/384/3956/10725/9655/3485/7124/283234/975/387/2113/3654/916/8764/84868/3037/9314/3071/7409/11314/9308/64127/1845/5063/84807/80381/54440/3586/3606/11006/3707/5724/9402/301/9750/81704/26191/10457/10673/55824/1840/2615/11221/84433/1803/4067/1604/3553/5295/920/941/114548/445/1051/10859/604/…
GO:1903039	GO:1903039	positive regulation of leukocyte cell-cell adhesion	178	-0.529082	-2.37838	1e-10	2.83487e-09	1.5428e-09	3178	tags=52%	list=21%	signal=41%	3676/7040/8767/6714/7292/57178/10808/912/4860/8440/1948/51043/1540/5970/5788/29126/3956/10725/9655/3485/7124/283234/975/387/2113/3654/916/8764/84868/3037/3071/7409/9308/64127/5063/84807/80381/54440/3606/11006/3707/5724/9402/301/81704/10673/11221/84433/1803/4067/1604/3553/5295/920/941/114548/10859/604/861/3965/942/3115/6347/199/10288/3133/8744/3718/857/3109/64926/3383/960/3113/3559/8013/1960/3689/…
GO:1903046	GO:1903046	meiotic cell cycle process	146	0.58238	2.53293	1e-10	2.83487e-09	1.5428e-09	1923	tags=40%	list=13%	signal=36%	83540/7272/991/7153/9232/995/81930/259266/23397/701/8438/9134/6790/9700/699/1164/84072/5347/151648/993/64180/9319/26271/4603/146956/10592/84057/83990/63979/29893/91646/5888/55706/9918/2175/256126/151246/898/10051/2956/23236/347688/644186/23310/675/80010/57697/5810/84930/378708/147872/3306/7283/245711/284071/25788/5885/4439/285498
GO:1903706	GO:1903706	regulation of hemopoiesis	379	-0.436367	-2.12241	1e-10	2.83487e-09	1.5428e-09	1828	tags=26%	list=12%	signal=23%	9308/57630/5916/286410/558/84807/54440/3606/760/11025/11006/3707/84959/4792/3059/7030/678/2353/56603/301/1840/2621/9580/11221/5292/84433/4067/10272/9935/5699/5295/920/941/6886/114548/56892/55365/1051/6777/10859/677/604/10234/861/3965/942/6935/4092/10288/1441/6688/1435/10398/146433/8744/3635/3718/9770/3111/1230/80149/2200/7305/4323/338382/28959/2213/3559/7098/8013/4609/1960/7099/714/1636/972/64115…
GO:1904018	GO:1904018	positive regulation of vasculature development	166	-0.576441	-2.57575	1e-10	2.83487e-09	1.5428e-09	3173	tags=55%	list=21%	signal=44%	3162/6648/3716/406888/6786/7422/6237/8837/1948/3091/51378/133/25/8817/2852/10266/7423/3687/4215/728/574506/2113/10519/3315/406919/2896/9734/6774/51564/3688/9314/7010/3586/406913/64094/4846/10769/51738/9037/301/57608/5587/8829/6915/7291/2246/3553/388/2247/7075/2321/3082/8877/1512/10411/861/718/23328/958/285/57381/80149/1958/187/2022/406890/7098/1545/719/947/3689/1536/5228/1003/94/7424/27286/8742/8…
GO:2000146	GO:2000146	negative regulation of cell motility	250	-0.486475	-2.27855	1e-10	2.83487e-09	1.5428e-09	3014	tags=43%	list=20%	signal=35%	57826/54567/6237/29/7076/5911/5176/51378/90865/9368/5912/25932/23189/100126315/57522/6422/182/51466/56833/574506/387/89795/153090/406943/10221/5793/3611/5467/27202/1809/6774/8519/22846/11057/5797/9314/7454/11314/9863/9289/161742/1845/7414/5592/26585/6722/56999/397/9750/4070/8434/5365/6672/79148/6781/6915/11221/22998/28984/7168/388/2247/247/7075/10370/3486/89927/6091/6347/4092/131450/199/79812/285…
GO:2000147	GO:2000147	positive regulation of cell motility	468	-0.500748	-2.47115	1e-10	2.83487e-09	1.5428e-09	2607	tags=41%	list=17%	signal=35%	83692/2852/7423/8874/5788/29126/389/3687/4215/23075/2771/1793/728/7124/8717/387/2113/2260/10519/3315/10509/8828/5581/153090/2896/338879/8764/3611/53905/81/9734/7114/9647/4267/6774/64218/8754/9732/51564/3037/3688/3071/2159/4249/1902/5063/7010/57007/406913/6810/56920/64094/5641/4846/2316/3685/6405/5724/6386/10769/9037/301/5293/284/9750/81704/57608/10457/50507/5587/5606/8829/5979/5420/9922/8660/2621…
GO:0034724	GO:0034724	DNA replication-independent nucleosome organization	39	0.736131	2.5076	1.00667e-10	2.83487e-09	1.5428e-09	2819	tags=64%	list=18%	signal=52%	11339/55355/57082/55723/1058/79682/79019/79172/64105/64946/54069/2491/387103/55839/91687/55166/378708/4678/8607/8520/55320/25842/201254/11198/5928
GO:0032675	GO:0032675	regulation of interleukin-6 production	113	-0.56565	-2.39063	1.14261e-10	3.19535e-09	1.73898e-09	2637	tags=48%	list=17%	signal=40%	84818/4615/9655/7124/7349/9261/26137/824/27202/84868/6774/3071/3557/64127/23208/3586/1535/5724/51738/7128/64170/26191/5027/2621/948/7291/3553/4155/2207/3082/114899/1051/3965/131450/199/10288/7097/3635/64581/59341/80149/7305/338382/7098/11213/7099/140885/84632/7096/972/51284/10365/54209/3569
GO:0043312	GO:0043312	neutrophil degranulation	422	-0.390605	-1.91011	1.17666e-10	3.26787e-09	1.77845e-09	2606	tags=35%	list=17%	signal=30%	4860/1509/57826/210/5329/29/10533/5908/240/5912/79792/25797/967/10577/10875/1727/2588/5788/3687/567/3303/4758/51816/353376/728/4125/9725/1675/55276/201294/387/3683/535/976/100049587/8987/81567/6515/391/2548/2896/3310/51411/966/5768/47/4973/1992/1471/5476/1774/230/25798/4790/3071/84329/374403/11314/3614/4126/2683/683/56729/9535/968/7414/5660/5873/11025/1535/6793/3685/5724/6386/3101/84766/2512/4033…
GO:0048659	GO:0048659	smooth muscle cell proliferation	132	-0.548353	-2.36704	1.20014e-10	3.31024e-09	1.8015e-09	2603	tags=42%	list=17%	signal=35%	2852/100126315/2771/7124/574506/3654/406919/10221/3611/5467/4209/1026/9314/10203/3586/3606/5592/1535/5724/7128/4318/7168/2247/1901/10257/5159/3486/199/10135/693223/4854/5136/1956/5739/8013/1012/1839/652/7048/5155/9510/7043/80310/3725/2006/407006/8862/8840/6934/3479/5743/1264/7057/4313/3569
GO:0030098	GO:0030098	lymphocyte differentiation	279	-0.444186	-2.10351	1.53736e-10	4.19626e-09	2.2837e-09	2580	tags=42%	list=17%	signal=35%	7292/2323/57178/912/4860/54567/538/3659/51043/1540/25/10875/29760/56262/5788/6422/567/3956/602/9655/56833/387/91543/916/8324/10538/5336/1880/974/9452/9734/695/6774/64218/51341/3688/3071/7409/5452/9308/57630/286410/558/84807/4242/54440/3586/3606/11006/3707/3589/6722/3087/678/56603/301/5293/26191/1316/1840/23210/2621/9580/112616/11221/11035/84433/9935/2207/5295/920/941/114548/10320/677/604/861/3965…
GO:0042326	GO:0042326	negative regulation of phosphorylation	411	-0.390477	-1.90703	1.54221e-10	4.19626e-09	2.2837e-09	2614	tags=30%	list=17%	signal=25%	284996/22876/2852/5788/6422/90007/10106/9655/2675/1850/6609/574506/116496/5187/1756/387/868/1848/10519/3315/2776/153090/51422/10221/28951/3611/1026/863/9647/79705/6774/1847/9314/5470/1849/5998/55243/11314/161742/1845/9535/5997/26585/84959/81848/3087/7128/284/26191/2122/200734/8660/26524/64092/467/5027/55450/54922/6690/7291/9467/11221/4067/91663/54541/3553/1028/8613/54625/3486/3082/10019/113791/40…
GO:0032103	GO:0032103	positive regulation of response to external stimulus	397	-0.393181	-1.91666	1.62141e-10	4.38216e-09	2.38486e-09	2423	tags=29%	list=16%	signal=25%	728/7124/5696/975/8717/79132/2113/2260/3949/3315/7132/661/2896/5336/3134/84868/7114/9647/695/115004/4790/3071/7409/3384/64127/1902/5063/5650/406913/6810/3606/64094/5641/1535/83666/4792/51738/9037/3603/64170/9750/5587/8829/2621/84433/4067/283131/3553/2247/5699/1901/2207/5159/9173/23643/1240/8578/1051/3965/3055/5359/718/199/23328/6279/3133/1435/7097/7857/1956/64581/59341/1230/8792/26471/5733/7098/7…
GO:0042119	GO:0042119	neutrophil activation	433	-0.384041	-1.883	1.74518e-10	4.68523e-09	2.5498e-09	2546	tags=30%	list=17%	signal=26%	2588/5788/3687/567/3303/4758/51816/353376/728/4125/9725/1675/55276/201294/387/3683/535/976/100049587/8987/81567/6515/391/2548/2896/3310/51411/966/5768/47/4973/1992/1471/5476/1774/230/25798/4790/3071/84329/374403/11314/3614/4126/2683/683/56729/9535/968/7414/5660/3606/5873/11025/1535/6793/3685/5724/6386/3101/84766/2512/4033/84514/10493/1520/3684/5337/1508/6518/64333/963/948/5175/6402/4318/26578/803…
GO:1905818	GO:1905818	regulation of chromosome separation	60	0.658174	2.43356	1.83035e-10	4.88133e-09	2.65653e-09	906	tags=37%	list=6%	signal=35%	891/7272/9787/991/9232/9212/701/9700/699/990/1062/5347/10403/84101/9319/26271/4085/54908/1063/81620/7517/10460
GO:0007596	GO:0007596	blood coagulation	252	-0.446822	-2.09143	1.94286e-10	5.1473e-09	2.80127e-09	2296	tags=32%	list=15%	signal=27%	3315/5581/2776/832/5336/3611/966/8858/2157/7454/7409/2159/953/558/7414/5592/5873/4846/2316/84959/6722/7094/81704/3709/10077/6915/5027/2621/948/83706/23533/4067/9002/2207/4627/5295/3048/10019/5359/114897/958/302/3937/10398/57572/857/3690/5327/5341/139818/375033/2039/2769/9060/308/947/2192/7099/9162/7056/23764/5156/710/1465/5155/10938/5328/1311/2191/5270/1281/10630/7450/1277/1278/5054/2152/7057/216…
GO:0043534	GO:0043534	blood vessel endothelial cell migration	116	-0.559153	-2.3803	2.0031e-10	5.23104e-09	2.84684e-09	3173	tags=52%	list=21%	signal=41%	3162/7040/406888/7422/54567/1948/3091/51378/25/8817/4215/574506/387/2113/2260/10519/3315/406943/9734/2876/7114/22846/51564/3688/9314/161742/406913/4846/26585/6722/10769/301/284/57608/5587/5606/8829/1969/6915/28984/2247/161198/4627/6091/3164/958/79812/285/57381/6776/1960/94/7424/27286/5155/407006/9353/406994/5743/7057
GO:0010965	GO:0010965	regulation of mitotic sister chromatid separation	56	0.671819	2.44387	2.00786e-10	5.23104e-09	2.84684e-09	906	tags=39%	list=6%	signal=37%	891/7272/9787/991/9232/9212/701/9700/699/990/1062/5347/10403/84101/9319/26271/4085/54908/1063/81620/7517/10460
GO:0007507	GO:0007507	heart development	484	-0.376262	-1.86225	2.01344e-10	5.23104e-09	2.84684e-09	2331	tags=26%	list=15%	signal=23%	2260/6092/57538/1848/32/7132/8828/63917/5463/8324/2548/3611/5467/9734/4209/80206/1026/5311/3037/3688/8321/10203/55553/9464/161742/7010/6464/9260/4846/2057/5997/26585/6722/56999/50507/8854/8829/9645/23210/7291/10611/26011/5292/7168/2702/2247/1901/8470/5159/10370/284612/677/4487/3643/6091/176/7122/10439/4092/11174/302/4634/55742/10848/57167/4000/6909/1956/2200/140706/6261/187/2022/7133/4629/10052/6…
GO:0007178	GO:0007178	transmembrane receptor protein serine/threonine kinase signaling pathway	272	-0.43493	-2.05908	2.25265e-10	5.81501e-09	3.16465e-09	2039	tags=31%	list=13%	signal=27%	3611/7041/8516/55198/10140/8754/51341/858/64388/6497/8321/9863/8425/57154/26585/23111/6386/65997/2353/4093/5829/5371/2615/94031/7791/4054/10272/1028/114990/10370/6498/4487/11167/6935/7122/4092/11030/3693/7431/857/10979/4053/2200/1958/56963/2022/406890/84913/54829/27122/1003/353500/94/50515/83891/23213/652/1601/7048/2331/1311/4920/255743/7043/3725/3077/375387/1281/3624/4681/1030/11117/1278/7046/40…
GO:0050870	GO:0050870	positive regulation of T cell activation	165	-0.507215	-2.26584	2.40657e-10	6.17277e-09	3.35935e-09	2580	tags=48%	list=17%	signal=41%	7040/8767/6714/7292/57178/10808/912/4860/8440/1948/51043/1540/5788/29126/3956/9655/3485/283234/975/387/916/8764/84868/3071/7409/9308/64127/5063/84807/80381/54440/3606/11006/3707/9402/301/81704/10673/11221/84433/1803/4067/1604/3553/5295/920/941/114548/10859/604/861/3965/942/3115/6347/199/10288/3133/8744/3718/857/3109/64926/3113/3559/1960/140885/7070/80380/30835/972/64115/7048/2737/1326/3566/940/64…
GO:0006334	GO:0006334	nucleosome assembly	66	0.647052	2.4583	2.47666e-10	6.31235e-09	3.43531e-09	3060	tags=48%	list=20%	signal=39%	11339/55355/57082/55723/1058/79682/79019/79172/64105/64946/4171/54069/10036/4674/2491/387103/3148/55839/91687/55166/8208/6662/378708/4678/8607/8520/55320/25842/201254/5928/6418/85453
GO:0033047	GO:0033047	regulation of mitotic sister chromatid segregation	66	0.646654	2.45679	2.85127e-10	7.22143e-09	3.93006e-09	1010	tags=35%	list=7%	signal=33%	891/7272/9787/991/9232/9212/701/9700/699/990/1062/5347/10403/84101/9319/26271/4085/54908/1063/81620/7517/10460/84250
GO:0018212	GO:0018212	peptidyl-tyrosine modification	304	-0.425305	-2.03014	3.0319e-10	7.59156e-09	4.13149e-09	2418	tags=34%	list=16%	signal=29%	7124/975/23568/2260/868/7465/916/8444/7132/5581/10188/8764/6503/695/79705/6774/30844/3595/2051/11314/683/7010/6464/558/79834/3356/3606/3589/26585/83666/91461/3059/51738/284/50507/5606/8829/1969/5979/64092/2621/8459/6690/948/5175/9467/4067/54625/7075/5159/920/941/27/6886/2321/3082/4739/10019/5168/3643/3055/958/23529/9021/7039/3718/857/1956/3690/9052/3383/960/2039/8445/57091/3689/7070/84632/1839/16…
GO:0000086	GO:0000086	G2/M transition of mitotic cell cycle	235	0.436301	2.0092	3.03512e-10	7.59156e-09	4.13149e-09	2710	tags=31%	list=18%	signal=26%	641/891/3161/9088/995/9212/9133/9833/22974/983/9928/5569/6790/63967/990/2305/51514/5347/890/10733/4998/993/8091/26271/90381/11113/1063/7480/8317/4751/22995/5243/11073/8883/10383/55722/23236/9024/79866/84131/595/121441/219736/84930/9793/7164/9738/11200/55142/3306/7283/5683/5885/54801/5520/9702/93323/57325/672/5884/115106/55835/6502/5694/7531/1017/79959/29980/5889/80174/10213/11116/3364/79441
GO:0033044	GO:0033044	regulation of chromosome organization	311	0.411856	1.97171	3.09477e-10	7.693e-09	4.18669e-09	4402	tags=42%	list=29%	signal=31%	891/7272/9787/991/7153/9232/9212/8318/701/9700/699/113130/990/5588/1111/1062/5570/5347/10403/3670/4288/84101/9319/29028/26271/4085/140690/2237/54908/1063/80119/4171/4674/116028/4751/120892/81620/10891/1789/7517/10460/84250/1663/4842/2625/8313/26147/55170/10459/201161/26993/3720/22948/54880/908/4089/8697/26155/2966/7334/3481/5885/9252/79829/4137/348654/672/10694/6879/10155/7203/25842/142/5599/9646…
GO:0002283	GO:0002283	neutrophil activation involved in immune response	425	-0.38622	-1.89001	3.1789e-10	7.85363e-09	4.27411e-09	2606	tags=34%	list=17%	signal=29%	4860/1509/57826/210/5329/29/10533/5908/240/5912/79792/25797/967/10577/10875/1727/2588/5788/3687/567/3303/4758/51816/353376/728/4125/9725/1675/55276/201294/387/3683/535/976/100049587/8987/81567/6515/391/2548/2896/3310/51411/966/5768/47/4973/1992/1471/5476/1774/230/25798/4790/3071/84329/374403/11314/3614/4126/2683/683/56729/9535/968/7414/5660/5873/11025/1535/6793/3685/5724/6386/3101/84766/2512/4033…
GO:0051017	GO:0051017	actin filament bundle assembly	139	-0.528886	-2.30519	3.30884e-10	8.12481e-09	4.42169e-09	2789	tags=47%	list=18%	signal=39%	25/11346/4082/221061/6422/389/23075/51466/134549/387/85358/81/9647/1809/7454/1902/116985/10458/6624/55616/2316/6722/25794/50944/4070/50507/8829/5829/221692/10174/85462/7791/22998/7984/28984/7168/388/1901/171024/390/5295/8477/4739/29109/10411/10391/2059/199/3693/90102/51474/5358/5341/22899/2039/79822/55160/29984/10395/87/7043/10580/2006/1490/7046
GO:0045132	GO:0045132	meiotic chromosome segregation	70	0.624333	2.3985	3.4494e-10	8.38022e-09	4.56069e-09	3174	tags=54%	list=21%	signal=43%	83540/7272/7153/9232/23397/701/9134/9700/699/84072/5347/151648/9319/146956/10592/83990/55706/256126/151246/898/10051/644186/80010/57697/378708/147872/284071/285498/150365/9985/2177/201254/5889/7155/23353/4361/10734/84464
GO:0022613	GO:0022613	ribonucleoprotein complex biogenesis	420	0.37841	1.8773	3.45447e-10	8.38022e-09	4.56069e-09	6841	tags=60%	list=45%	signal=34%	90381/26609/10799/135295/25804/23212/8665/6732/6636/6632/6606/29093/3669/51491/84135/55299/10907/6635/4839/64965/9816/65008/79863/6637/29960/60680/55759/26155/25926/11168/6631/705/23405/27043/1983/8607/8886/11103/80135/58155/10419/7514/50628/51121/55651/5433/134430/25879/6880/6895/115416/5901/8662/10556/2483/4927/4686/11218/6634/83640/51602/153443/8568/54606/51154/8175/10775/57418/51010/23517/270…
GO:0032956	GO:0032956	regulation of actin cytoskeleton organization	302	-0.420089	-1.99945	3.51121e-10	8.46684e-09	4.60784e-09	2663	tags=35%	list=17%	signal=29%	55114/653857/23189/6422/389/10109/57822/23075/7408/51466/387/5581/85358/832/391/83700/3611/9948/11344/80206/7114/9647/10095/3071/7454/55243/1902/116985/10458/5063/683/51332/7010/9886/9535/6624/10435/55616/128272/2316/3059/9037/50944/397/4070/50507/8829/9912/5829/23433/29767/10174/22998/91663/7984/28984/7168/388/22836/1901/171024/5159/57731/390/5295/27/8477/58480/148170/29109/10411/10391/3055/2059…
GO:0007599	GO:0007599	hemostasis	256	-0.443201	-2.08195	3.53762e-10	8.47977e-09	4.61487e-09	2296	tags=31%	list=15%	signal=27%	3315/5581/2776/832/5336/3611/966/8858/2157/7454/7409/2159/953/558/7414/5592/5873/4846/2316/84959/6722/7094/81704/3709/10077/6915/5027/2621/948/83706/23533/4067/9002/2207/4627/5295/3048/10019/5359/114897/958/302/3937/10398/57572/857/3690/5327/5341/139818/375033/2039/2769/9060/308/947/2192/7099/9162/7056/23764/5156/710/1465/5155/10938/5328/1311/2191/5270/1281/10630/7450/1277/1278/5054/2152/7057/216…
GO:0032392	GO:0032392	DNA geometric change	116	0.54461	2.29334	3.76768e-10	8.97777e-09	4.88589e-09	4369	tags=53%	list=29%	signal=38%	641/7153/8318/8438/51659/9837/9401/4173/10721/3149/84296/5983/54821/80119/4171/83990/79075/5888/5984/3148/4174/63922/84515/4172/5985/1663/4176/1107/165545/2966/5982/25788/56652/1161/8607/1763/57680/84083/142/54617/10856/3146/4361/3159/9978/79913/4175/6117/4683/1660/56897/3181/55636/7157/8451/56852/1108/5965/9400/9557/2967/7520
GO:0007127	GO:0007127	meiosis I	83	0.602553	2.39798	3.85979e-10	9.14317e-09	4.97591e-09	3174	tags=55%	list=21%	signal=44%	7153/9232/8438/9134/6790/9700/1164/84072/5347/9319/26271/4603/146956/84057/83990/29893/5888/55706/256126/898/644186/675/80010/57697/378708/147872/3306/284071/25788/5885/4439/285498/150365/9985/2177/201254/5889/79703/7155/11105/23353/29988/4361/10734/4437/84464
GO:0071824	GO:0071824	protein-DNA complex subunit organization	196	0.467948	2.11141	3.96761e-10	9.3436e-09	5.08498e-09	4386	tags=43%	list=29%	signal=31%	11339/55355/8318/57082/55723/1058/79682/1062/79019/4173/79172/64105/64946/51053/1063/4171/54069/10036/4674/5888/7480/2491/3070/387103/3148/4174/81620/55839/4172/91687/6119/55166/4176/8208/201161/6662/378708/9014/2966/4678/8607/8520/79003/55320/6879/25842/2960/142/201254/11198/54617/9330/23595/5928/55011/5893/6418/85453/3146/3159/81611/9978/6944/1022/4175/54107/4676/5702/6117/6605/6118/5931/55814/…
GO:0050817	GO:0050817	coagulation	254	-0.443145	-2.08208	4.08966e-10	9.57503e-09	5.21094e-09	2296	tags=31%	list=15%	signal=27%	3315/5581/2776/832/5336/3611/966/8858/2157/7454/7409/2159/953/558/7414/5592/5873/4846/2316/84959/6722/7094/81704/3709/10077/6915/5027/2621/948/83706/23533/4067/9002/2207/4627/5295/3048/10019/5359/114897/958/302/3937/10398/57572/857/3690/5327/5341/139818/375033/2039/2769/9060/308/947/2192/7099/9162/7056/23764/5156/710/1465/5155/10938/5328/1311/2191/5270/1281/10630/7450/1277/1278/5054/2152/7057/216…
GO:1902107	GO:1902107	positive regulation of leukocyte differentiation	121	-0.552073	-2.35428	4.40392e-10	1.02512e-08	5.57893e-09	2477	tags=41%	list=16%	signal=35%	9655/133522/7124/387/10221/695/3071/140685/9308/286410/558/84807/54440/3606/760/11006/3707/3059/2353/301/2621/11221/920/941/114548/677/604/861/3965/942/10288/1435/146433/8744/3635/1230/7305/4323/3559/1960/972/64115/7048/2737/4920/3725/3566/54209/64332/3976
GO:0007088	GO:0007088	regulation of mitotic nuclear division	154	0.49885	2.19133	4.99207e-10	1.15535e-08	6.28766e-09	2140	tags=34%	list=14%	signal=29%	891/11065/7272/9787/991/51203/9232/9088/995/54443/9212/701/6790/9700/699/113130/990/1111/1062/3832/5347/10403/4288/84101/9585/9319/26271/4085/54908/1063/64793/4751/1906/27085/81620/655/7517/10460/79866/84250/10040/10459/55512/9735/8697/137886/3481/5885/57026/5902/10419/348654
GO:0044839	GO:0044839	cell cycle G2/M phase transition	253	0.430954	2.00344	5.11767e-10	1.17765e-08	6.40902e-09	4405	tags=45%	list=29%	signal=33%	641/891/3161/9088/995/9212/9133/9833/22974/983/9928/5569/6790/63967/990/2305/1111/51512/51514/5347/890/10733/4998/993/8091/26271/90381/11113/79915/1063/7480/8317/4751/22995/5243/11073/8883/10383/55722/23236/9024/79866/84131/595/121441/219736/84930/26993/9793/7164/9738/11200/55142/3306/7283/5683/5885/54801/5520/9702/93323/57325/672/5884/115106/55835/6502/5694/7531/1017/79959/29980/5889/80174/10213…
GO:1903034	GO:1903034	regulation of response to wounding	142	-0.515672	-2.25963	5.26264e-10	1.20413e-08	6.55312e-09	1671	tags=37%	list=11%	signal=34%	3586/5592/64094/4846/825/84959/7128/301/6915/58189/948/11221/4067/51330/50506/2247/8613/2207/4627/6696/8578/10019/114897/302/90102/857/64581/56963/5327/5341/2039/308/947/7099/11202/1839/7056/4638/5156/710/7048/5155/4035/5328/2191/5270/10630/407006/8840/5054/2152/5764/7057
GO:1901987	GO:1901987	regulation of cell cycle phase transition	430	0.369016	1.83161	5.61079e-10	1.27229e-08	6.92407e-09	2710	tags=26%	list=18%	signal=22%	641/891/11065/3161/7272/9787/991/995/54443/9212/8318/701/22974/1869/983/9928/5569/6790/9700/699/144455/6496/2810/63967/113130/990/1111/1062/51512/51514/5347/10403/79733/10733/4998/84101/993/9319/8091/26271/90381/81610/100126316/4085/54908/79915/1063/7480/8317/4751/27085/10926/7015/22995/2146/2735/898/81620/11073/8883/10383/23026/7517/138151/55722/23236/5111/84131/595/79447/10459/126520/121441/219…
GO:0006336	GO:0006336	DNA replication-independent nucleosome assembly	38	0.734905	2.48814	5.62373e-10	1.27229e-08	6.92407e-09	2550	tags=61%	list=17%	signal=51%	11339/55355/57082/55723/1058/79682/79019/79172/64105/64946/54069/2491/387103/55839/91687/55166/378708/4678/8607/8520/55320/25842/201254
GO:0001938	GO:0001938	positive regulation of endothelial cell proliferation	83	-0.609649	-2.47797	7.10235e-10	1.59783e-08	8.69573e-09	2407	tags=46%	list=16%	signal=39%	574506/2260/8828/406919/6774/858/7010/3586/406913/1535/51738/9037/57608/5587/8829/5365/2247/3164/51162/7857/3690/187/6776/1012/1960/5228/94/7424/8291/8742/652/5155/1893/3725/7046/8862/6387/2152
GO:0007179	GO:0007179	transforming growth factor beta receptor signaling pathway	165	-0.497896	-2.22422	7.46813e-10	1.67079e-08	9.09278e-09	2135	tags=33%	list=14%	signal=29%	7041/8516/55198/8754/51341/858/6497/8425/57154/6386/65997/2353/4093/5829/5371/2615/94031/7791/4054/1028/114990/10370/6498/6935/7122/4092/3693/857/10979/4053/2200/2022/406890/54829/27122/1003/94/50515/83891/1601/7048/2331/255743/7043/3725/375387/1281/1030/11117/1278/7046/406994/5654/4015/7057
GO:0034660	GO:0034660	ncRNA metabolic process	432	0.373966	1.85604	7.58844e-10	1.68212e-08	9.15447e-09	6371	tags=59%	list=42%	signal=35%	4603/91646/10799/23212/92935/113802/7965/3669/129450/84135/51728/3265/10056/92675/25896/4839/64965/65008/79863/129563/93587/51605/29960/55759/25926/6741/51002/705/23405/9836/27043/9097/8886/11103/80135/9521/114034/54938/4137/8270/50628/55651/134430/25879/57510/6895/5901/55157/1478/64172/55278/79731/6894/26173/10556/116461/283989/2483/51602/54931/153443/8568/51067/54606/51154/10775/25973/57418/510…
GO:0001933	GO:0001933	negative regulation of protein phosphorylation	378	-0.392375	-1.90662	7.60234e-10	1.68212e-08	9.15447e-09	2614	tags=30%	list=17%	signal=26%	284996/22876/2852/5788/6422/10106/9655/2675/1850/6609/574506/116496/5187/1756/868/1848/10519/3315/2776/153090/51422/10221/28951/3611/1026/9647/79705/1847/9314/5470/1849/5998/55243/11314/161742/1845/9535/5997/26585/84959/81848/3087/7128/284/26191/2122/200734/26524/64092/467/5027/55450/54922/6690/7291/9467/11221/4067/91663/54541/3553/1028/8613/54625/3486/3082/10019/4092/9021/55022/2308/857/9770/553…
GO:0051306	GO:0051306	mitotic sister chromatid separation	59	0.652147	2.402	7.94286e-10	1.74786e-08	9.51224e-09	906	tags=37%	list=6%	signal=35%	891/7272/9787/991/9232/9212/701/9700/699/990/1062/5347/10403/84101/9319/26271/4085/54908/1063/81620/7517/10460
GO:0050730	GO:0050730	regulation of peptidyl-tyrosine phosphorylation	206	-0.469752	-2.14414	8.52134e-10	1.85858e-08	1.01148e-08	2605	tags=39%	list=17%	signal=33%	22876/5788/6422/5526/9655/7124/975/23568/868/916/7132/5581/10188/8764/79705/6774/30844/11314/683/6464/3356/3606/3589/26585/83666/3059/51738/284/50507/8829/64092/2621/6690/948/5175/9467/4067/54625/920/941/6886/3082/4739/10019/5168/958/23529/9021/7039/857/1956/3690/9052/3383/960/2039/57091/3689/7070/84632/1839/1636/972/5155/1436/1464/54206/80310/1946/4038/407006/3678/54209/3479/5008/1272/2209/2252/…
GO:0032543	GO:0032543	mitochondrial translation	133	0.516523	2.22159	8.53829e-10	1.85858e-08	1.01148e-08	5410	tags=70%	list=35%	signal=46%	54148/64968/92259/4701/29093/51318/28998/64965/65008/54534/51258/57129/79072/64983/3396/51373/23107/6472/84340/64960/115416/55157/55278/28977/55168/56945/55173/64978/54931/10884/60488/51067/4528/219927/740/10573/79590/84881/64951/65080/64979/708/51116/26995/51253/11222/26589/6150/65005/51001/54516/51264/51649/54460/55037/51023/90480/84300/122704/10128/9553/51642/28957/84311/51069/51263/5018/85476…
GO:0002790	GO:0002790	peptide secretion	478	-0.371446	-1.83651	8.98166e-10	1.94458e-08	1.05828e-08	2128	tags=26%	list=14%	signal=23%	5467/933/27202/9734/84868/8864/7114/1992/8754/9501/114769/834/399687/57555/64175/3557/5452/64127/3790/8425/23208/7442/6284/192683/11118/9066/3586/6810/3685/51738/5552/7128/91608/9572/301/284/26191/3709/6623/6513/10673/8660/5371/5027/2615/2621/948/7291/55107/84433/1803/4067/28984/3553/2702/4155/6616/247/379/10631/9173/23601/114548/114899/10859/10411/3382/3965/113277/10312/131450/199/8447/6279/958/…
GO:0140053	GO:0140053	mitochondrial gene expression	160	0.491486	2.18219	9.66291e-10	2.08088e-08	1.13246e-08	5637	tags=69%	list=37%	signal=44%	54148/64968/92259/4701/29093/51318/28998/64965/65008/93587/54534/51258/57129/79072/64983/3396/56652/51373/23107/6472/84340/64960/9238/115416/55157/55278/28977/55168/56945/55173/64978/54931/10884/60488/7019/51067/4528/219927/740/10573/54802/79590/84881/64951/65080/64979/708/51116/26995/51253/11222/26589/6150/65005/51001/54516/51264/51649/54460/55037/51023/90480/84300/122704/5442/60528/10128/9553/5…
GO:0071706	GO:0071706	tumor necrosis factor superfamily cytokine production	130	-0.52788	-2.27343	9.8271e-10	2.10499e-08	1.14558e-08	2580	tags=42%	list=17%	signal=35%	5788/29126/384/602/9261/3315/406919/26137/1191/27202/84868/64127/23208/558/54440/3586/1535/5724/51738/7128/284/64170/26191/10457/2621/948/7291/2207/5295/23643/10859/3965/113277/942/3133/7097/64581/80149/7305/945/7098/11213/947/7099/1536/140885/7096/64115/6348/54206/929/7538/54209/3479/7057
GO:0031055	GO:0031055	chromatin remodeling at centromere	32	0.762047	2.48082	1.11293e-09	2.37132e-08	1.29052e-08	2191	tags=66%	list=14%	signal=56%	11339/55355/57082/1058/79682/79019/79172/64105/64946/54069/2491/3070/387103/55839/91687/55166/201161/378708/4678/8607/55320
GO:1903708	GO:1903708	positive regulation of hemopoiesis	155	-0.502984	-2.23482	1.31644e-09	2.79016e-08	1.51846e-08	2580	tags=39%	list=17%	signal=33%	5788/182/3303/9655/133522/7124/387/2113/10221/695/6774/3071/140685/9308/286410/558/84807/54440/3606/760/11006/3707/3059/2353/301/2621/11221/920/941/6886/114548/6777/677/604/861/3965/942/10288/1435/146433/8744/3635/1230/7305/4323/338382/3559/1960/972/64115/7048/2737/4920/3725/3566/3624/407006/54209/64332/3976
GO:0071559	GO:0071559	response to transforming growth factor beta	214	-0.459851	-2.1087	1.38058e-09	2.91079e-08	1.58411e-08	2135	tags=32%	list=14%	signal=28%	7041/8516/55198/8754/51341/858/6497/55553/8425/57154/1284/6386/65997/678/2353/4093/7123/50507/5829/5371/2615/94031/3987/7791/4054/1028/114990/10631/10370/6498/677/6935/7122/4092/3693/857/10979/4053/2200/2022/406890/54829/27122/1003/94/463/50515/83891/1601/7048/2331/255743/7043/80310/3725/375387/1281/1277/1030/11117/1278/7046/406994/25878/8483/5654/4015/7057
GO:0048705	GO:0048705	skeletal system morphogenesis	184	-0.477188	-2.15346	1.39547e-09	2.92685e-08	1.59285e-08	1769	tags=29%	list=12%	signal=26%	5916/1293/7010/26585/56603/6781/5027/7291/4054/3203/22856/3216/579/84159/4487/176/6935/302/649/51435/59341/4323/1291/871/144347/64856/1292/4256/85301/50515/5156/652/64651/359845/7048/2737/1311/4920/7043/1490/1277/7373/338773/9249/3200/7046/860/6424/4313/4148/1303/1301/6423
GO:0007091	GO:0007091	metaphase/anaphase transition of mitotic cell cycle	54	0.662223	2.38608	1.42374e-09	2.97068e-08	1.61671e-08	906	tags=39%	list=6%	signal=37%	891/7272/9787/991/9212/701/9700/699/990/1062/5347/10403/84101/9319/26271/4085/54908/1063/81620/7517/10460
GO:0030316	GO:0030316	osteoclast differentiation	81	-0.594166	-2.39943	1.5049e-09	3.12383e-08	1.70006e-08	2434	tags=47%	list=16%	signal=40%	133522/7124/22904/975/1880/79705/760/11025/11006/84959/7030/2353/1969/10272/9935/2207/5295/126014/1051/10859/10234/10312/302/1435/3635/9644/9770/1230/2200/7305/8792/7098/7099/3726/1436/6348/54209/8840
GO:0044784	GO:0044784	metaphase/anaphase transition of cell cycle	55	0.655998	2.37311	1.57799e-09	3.22775e-08	1.75661e-08	906	tags=38%	list=6%	signal=36%	891/7272/9787/991/9212/701/9700/699/990/1062/5347/10403/84101/9319/26271/4085/54908/1063/81620/7517/10460
GO:0033046	GO:0033046	negative regulation of sister chromatid segregation	43	0.70372	2.44429	1.57901e-09	3.22775e-08	1.75661e-08	891	tags=42%	list=6%	signal=40%	891/7272/991/9232/9212/701/9700/699/5347/10403/84101/9319/26271/4085/54908/1063/81620/7517
GO:0051985	GO:0051985	negative regulation of chromosome segregation	43	0.70372	2.44429	1.57901e-09	3.22775e-08	1.75661e-08	891	tags=42%	list=6%	signal=40%	891/7272/991/9232/9212/701/9700/699/5347/10403/84101/9319/26271/4085/54908/1063/81620/7517
GO:0008608	GO:0008608	attachment of spindle microtubules to kinetochore	32	0.757551	2.46618	1.68194e-09	3.4208e-08	1.86167e-08	710	tags=44%	list=5%	signal=42%	891/83540/9212/57082/11004/1062/29127/10403/151648/10615/1894/90417/4751/81620
GO:2001236	GO:2001236	regulation of extrinsic apoptotic signaling pathway	135	-0.522365	-2.25204	1.69797e-09	3.43603e-08	1.86996e-08	2669	tags=41%	list=17%	signal=34%	5970/2852/5788/6422/3303/8682/7185/7124/8717/2260/2876/8996/8743/57630/6810/4846/3685/2537/7128/8829/5979/6672/467/5371/4055/4170/51330/3553/6498/3082/147138/596/4000/857/7857/50486/8406/3383/23017/219699/355/8742/652/2070/85450/7078/3624/7046/407006/64798/5054/6934/3479/7057/6423
GO:0034470	GO:0034470	ncRNA processing	365	0.379485	1.84953	1.72416e-09	3.47161e-08	1.88932e-08	6371	tags=58%	list=42%	signal=35%	10799/23212/3669/129450/84135/51728/25896/4839/64965/65008/79863/93587/51605/29960/55759/25926/6741/51002/705/23405/9836/27043/9097/8886/11103/80135/114034/8270/50628/55651/134430/25879/6895/1478/64172/6894/26173/10556/116461/283989/2483/51602/54931/153443/8568/54606/51154/10775/57418/51010/23517/27079/123263/54802/55011/84128/84881/9875/65080/29102/91893/11056/54487/11062/134637/260294/51729/797…
GO:0090068	GO:0090068	positive regulation of cell cycle process	252	0.422259	1.96112	1.86266e-09	3.73181e-08	2.03093e-08	2827	tags=35%	list=18%	signal=29%	891/11065/9787/51203/995/9212/8318/1869/983/9928/6790/9700/144455/2810/113130/990/51512/51514/29127/10403/10615/79733/10733/9585/993/8091/26271/81610/4085/11113/2237/1894/79915/9493/25886/7480/8317/3642/1906/27085/10926/7015/2146/2735/29899/898/81620/7517/23236/84250/5111/54627/1663/6665/9475/595/79447/201161/79848/8851/219736/11200/55512/85459/3306/137886/3481/5885/5902/348654/672/83695/1027/585…
GO:0002687	GO:0002687	positive regulation of leukocyte migration	100	-0.568557	-2.35709	2.07564e-09	4.13793e-08	2.25195e-08	1643	tags=42%	list=11%	signal=38%	83692/7423/23075/728/7124/387/8764/4267/3071/5641/5724/9750/81704/2621/1240/3965/199/83483/1435/59341/1230/4323/3383/719/6351/5228/7070/623/7424/8291/972/3554/6348/80310/54209/9547/5919/5054/6387/5764/7057/3569
GO:0071692	GO:0071692	protein localization to extracellular region	461	-0.365544	-1.7976	2.17869e-09	4.32196e-08	2.3521e-08	2128	tags=25%	list=14%	signal=22%	5467/933/27202/9734/84868/8864/7114/1992/8754/9501/114769/834/399687/57555/64175/3557/5452/64127/3790/23208/6284/192683/11118/9066/3586/6810/3685/51738/5552/7128/9572/301/284/26191/3709/6623/6513/10673/8660/5371/5027/2615/2621/948/7291/55107/84433/1803/4067/28984/3553/2702/4155/6616/247/379/10631/9173/23601/114548/114899/10859/10411/3382/3965/113277/10312/131450/199/8447/958/22861/3937/3133/7097/…
GO:0008380	GO:0008380	RNA splicing	412	0.369251	1.82458	2.439e-09	4.81463e-08	2.62022e-08	6357	tags=58%	list=42%	signal=35%	4857/1993/79622/55544/2334/54845/80004/84530/135295/25804/10891/84321/6732/10212/23658/6636/6632/6606/51692/8227/54715/146713/8458/26993/10907/6635/28960/51319/6637/9984/60680/6626/11168/10189/1479/6631/54033/55110/58155/10465/10419/10283/50628/51645/64783/5433/84844/285672/22827/1477/1478/5437/116461/8899/283989/2483/84872/4686/11218/6634/284695/57819/51690/24144/25862/55339/8175/23517/6628/3187…
GO:1903555	GO:1903555	regulation of tumor necrosis factor superfamily cytokine production	126	-0.527175	-2.25321	2.77544e-09	5.45205e-08	2.96712e-08	2580	tags=43%	list=17%	signal=36%	5788/29126/384/602/9261/3315/406919/26137/1191/27202/84868/64127/23208/558/54440/3586/1535/5724/51738/7128/284/64170/26191/10457/2621/948/7291/2207/5295/23643/10859/3965/942/3133/7097/64581/80149/7305/945/7098/11213/947/7099/1536/140885/7096/64115/6348/54206/929/7538/54209/3479/7057
GO:0002697	GO:0002697	regulation of immune effector process	317	-0.402354	-1.92462	2.89012e-09	5.64976e-08	3.07472e-08	2477	tags=35%	list=16%	signal=30%	9655/3098/728/56833/6397/7124/3075/975/201294/79132/200558/3426/91543/721/629/2896/8764/1191/966/3134/933/27202/84868/695/55198/115004/399687/7454/7409/11314/3106/10475/64127/720/200316/84807/54440/5650/3586/6810/3105/3606/151636/5724/83666/717/7128/301/284/3107/3684/10077/5027/948/11221/11035/30817/4067/3434/1604/3553/2207/941/114548/10859/604/3965/942/718/716/4092/958/8741/3133/715/23529/8832/3…
GO:0002040	GO:0002040	sprouting angiogenesis	115	-0.542282	-2.29661	3.22134e-09	6.26683e-08	3.41054e-08	1959	tags=43%	list=13%	signal=37%	51564/3688/9314/161742/7010/3586/406913/26585/6722/10769/4804/51738/9037/301/56999/284/57608/8829/8434/1969/23210/6915/2246/2247/161198/2321/6091/3164/79812/55742/57381/187/1012/1960/25960/5228/94/7424/27286/652/11082/4017/90993/10365/407006/3678/9353/5743/7057
GO:0071560	GO:0071560	cellular response to transforming growth factor beta stimulus	208	-0.454383	-2.07989	3.31073e-09	6.40977e-08	3.48833e-08	2135	tags=32%	list=14%	signal=28%	7041/8516/55198/8754/51341/858/6497/55553/8425/57154/1284/6386/65997/678/2353/4093/7123/50507/5829/5371/2615/94031/3987/7791/4054/1028/114990/10631/10370/6498/677/6935/7122/4092/3693/857/10979/4053/2200/2022/406890/54829/27122/1003/94/50515/83891/1601/7048/2331/255743/7043/80310/3725/375387/1281/1277/1030/11117/1278/7046/406994/8483/5654/4015/7057
GO:0042098	GO:0042098	T cell proliferation	145	-0.50384	-2.21592	3.36562e-09	6.48485e-08	3.52919e-08	3162	tags=47%	list=21%	signal=38%	7040/8767/5074/7292/912/4860/8440/3659/51043/3620/25/5788/29126/384/3485/283234/975/11119/916/8764/84868/4478/3071/57630/2000/80381/54440/3586/3606/301/81704/10457/10673/5027/2615/11035/84433/1604/3553/5699/920/941/1051/10859/3965/942/3115/199/10288/3133/8744/3718/3109/1794/6556/64926/7133/3113/3559/80380/30835/64115/652/7048/940/11326/3479/3569
GO:0002062	GO:0002062	chondrocyte differentiation	106	-0.551582	-2.3001	3.39641e-09	6.51302e-08	3.54452e-08	1812	tags=42%	list=12%	signal=37%	55553/5916/1293/26585/91461/150356/64764/4054/22856/579/5744/4094/176/302/51435/1291/871/11173/94/144347/64856/1292/85301/50515/7045/23213/652/359845/7048/1893/2737/55959/1311/4017/1490/7373/7046/2202/8840/860/4148/1303/1301/6423
GO:0032640	GO:0032640	tumor necrosis factor production	126	-0.524741	-2.24281	3.66387e-09	6.99262e-08	3.80553e-08	2318	tags=42%	list=15%	signal=36%	5788/384/602/9261/3315/406919/26137/1191/27202/84868/64127/23208/558/54440/3586/1535/5724/51738/7128/284/64170/26191/10457/2621/948/7291/2207/5295/23643/10859/3965/113277/3133/7097/64581/80149/7305/945/7098/11213/947/7099/1536/140885/7096/64115/6348/54206/929/7538/54209/3479/7057
GO:0002695	GO:0002695	negative regulation of leukocyte activation	136	-0.513797	-2.21788	3.73164e-09	7.08835e-08	3.85763e-08	2884	tags=51%	list=19%	signal=42%	3162/7040/5074/7292/29/3659/51043/135/3620/10875/2852/5788/6422/29126/384/9655/3949/2896/8764/3134/84868/695/11314/1845/558/84807/3586/7128/9572/301/9750/26191/10457/55824/1840/10077/64092/2615/4067/146722/941/1051/10859/604/861/3965/7940/942/4092/10288/8530/3635/8832/3718/80149/7305/2213/3559/79626/80380/972/64115/652/2737/4332/3077/3566/3624/11326
GO:0045637	GO:0045637	regulation of myeloid cell differentiation	187	-0.46638	-2.11094	3.82835e-09	7.23791e-08	3.93902e-08	2570	tags=34%	list=17%	signal=28%	6422/182/567/3303/133522/7124/2113/10519/10221/192670/6774/3071/140685/5916/760/11025/11006/3707/84959/4792/3059/7030/2353/4067/10272/9935/5295/920/6886/1051/6777/10859/677/10234/861/1441/6688/1435/10398/146433/3635/9770/1230/2200/7305/338382/7098/8013/4609/7099/714/972/4920/6348/3725/3624/407006/7538/54209/4212/4015/7057/3976
GO:1901990	GO:1901990	regulation of mitotic cell cycle phase transition	400	0.369046	1.82216	3.91108e-09	7.35977e-08	4.00534e-08	2710	tags=26%	list=18%	signal=22%	641/891/11065/3161/7272/9787/991/995/54443/9212/8318/701/22974/1869/983/9928/5569/6790/9700/699/144455/2810/63967/113130/990/1062/51512/51514/5347/10403/79733/10733/4998/84101/993/9319/8091/26271/90381/4085/54908/79915/1063/7480/8317/4751/27085/7015/22995/2146/898/81620/11073/8883/10383/23026/7517/138151/55722/23236/5111/84131/595/10459/126520/121441/219736/9793/9738/11200/9735/55142/8697/3306/72…
GO:0022408	GO:0022408	negative regulation of cell-cell adhesion	142	-0.497717	-2.18096	4.15158e-09	7.776e-08	4.23186e-08	3043	tags=49%	list=20%	signal=40%	7292/7422/928/3659/51043/135/3620/25/10875/5465/29126/182/23075/384/9655/8764/84868/9647/9314/11314/3557/1845/84807/3586/5592/84959/301/9750/26191/10457/5420/55824/1840/2615/91663/28984/4155/941/445/1051/10859/10019/604/861/3965/942/114897/4092/80709/10288/53827/3718/59341/80149/140706/406890/2213/3559/79626/80380/972/64115/652/2737/3077/5270/3566/407006/11326/6387
GO:0061041	GO:0061041	regulation of wound healing	116	-0.530554	-2.25856	4.34771e-09	8.10567e-08	4.41128e-08	1655	tags=40%	list=11%	signal=36%	5592/64094/4846/825/84959/7128/301/6915/58189/948/11221/4067/51330/50506/2247/8613/2207/4627/10019/114897/302/90102/857/64581/5327/5341/2039/308/947/7099/1839/7056/4638/5156/710/7048/5155/5328/2191/5270/10630/407006/8840/5054/2152/7057
GO:1902749	GO:1902749	regulation of cell cycle G2/M phase transition	202	0.443001	2.01181	4.38907e-09	8.13093e-08	4.42502e-08	4405	tags=46%	list=29%	signal=33%	641/891/3161/995/9212/22974/983/9928/5569/6790/63967/990/1111/51512/51514/5347/10733/4998/993/8091/26271/90381/79915/1063/7480/8317/4751/22995/11073/8883/10383/55722/84131/595/121441/219736/9793/9738/55142/3306/7283/5683/5885/54801/9702/93323/672/5884/115106/55835/5694/7531/1017/79959/29980/5889/80174/10213/11116/3364/79441/5695/55125/203068/4361/9978/51720/22981/5687/9662/80321/22976/5702/4683/5…
GO:1902099	GO:1902099	regulation of metaphase/anaphase transition of cell cycle	52	0.659247	2.3709	4.40164e-09	8.13093e-08	4.42502e-08	891	tags=38%	list=6%	signal=36%	891/7272/9787/991/9212/701/9700/699/990/1062/5347/10403/84101/9319/26271/4085/54908/1063/81620/7517
GO:0030282	GO:0030282	bone mineralization	95	-0.572297	-2.3586	4.43489e-09	8.14027e-08	4.43011e-08	1683	tags=35%	list=11%	signal=31%	7286/26585/91461/5552/7123/10457/56172/5027/7291/4054/1901/5744/1230/54829/144347/4256/652/359845/1893/1311/4920/6348/7043/4921/1278/338773/2824/3479/3491/5743/5764/4015/5167
GO:0051783	GO:0051783	regulation of nuclear division	169	0.473539	2.1199	4.44713e-09	8.14027e-08	4.43011e-08	1888	tags=31%	list=12%	signal=27%	891/11065/7272/9787/991/51203/9232/9088/995/54443/9212/701/6790/9700/699/113130/990/1111/84072/1062/3832/5347/10403/4288/84101/9585/9319/26271/4085/54908/1063/64793/4751/1906/27085/81620/655/7517/10460/23236/79866/84250/10040/10459/5810/55512/9735/8697/137886/3481/5885/57026
GO:0070371	GO:0070371	ERK1 and ERK2 cascade	244	-0.432679	-2.0196	4.46988e-09	8.14489e-08	4.43262e-08	1821	tags=30%	list=12%	signal=27%	64127/9464/161742/1845/7010/6464/57007/406913/3356/3685/81848/678/284/26191/10457/50507/8829/1969/467/2621/55450/948/11221/4067/3553/2247/5159/920/2321/1512/677/3965/6347/152007/10268/1956/59341/1230/3383/8792/960/2335/5322/4609/2192/7099/6351/1843/140885/8482/10252/972/5156/652/112464/5155/1436/4035/6348/255743/54206/80310/3725/6349/7078/1490/11117/407006/54209/3479/3491/2633/3976
GO:0007098	GO:0007098	centrosome cycle	118	0.518003	2.18752	5.03236e-09	9.11917e-08	4.96284e-08	4206	tags=53%	list=27%	signal=38%	983/6790/1111/3832/5347/6491/151648/10733/25886/899/284403/64793/4751/22995/163786/7517/55722/84612/9768/675/9475/117178/1107/7516/9793/9738/55142/85459/137886/29901/84552/54801/5902/7514/50855/348654/93323/6566/672/25914/115106/55835/1070/1017/4591/79959/79441/26973/11127/55125/116840/54875/9662/26005/55755/23224/23354/22994/51175/9525/4659/11190
GO:0090092	GO:0090092	regulation of transmembrane receptor protein serine/threonine kinase signaling pathway	185	-0.460535	-2.08304	5.04985e-09	9.11917e-08	4.96284e-08	2173	tags=31%	list=14%	signal=27%	3611/7041/8516/10140/51341/858/64388/6497/8321/9863/8425/57154/26585/23111/6386/65997/94031/10272/1028/114990/10370/6498/4487/11167/6935/4092/11030/857/2200/2022/406890/54829/27122/1003/353500/94/50515/83891/23213/652/1601/7048/255743/7043/3077/375387/3624/4681/1030/11117/7046/3491/8483/5654/4015/6424/7057/6423
GO:0051303	GO:0051303	establishment of chromosome localization	70	0.600508	2.30697	5.25569e-09	9.44851e-08	5.14208e-08	2017	tags=34%	list=13%	signal=30%	891/83540/9787/3833/81930/9928/11004/113130/55143/1062/10403/10615/81610/54908/1063/3835/81620/23212/55166/147872/8697/284071/79003/150365
GO:0043535	GO:0043535	regulation of blood vessel endothelial cell migration	92	-0.569109	-2.32818	5.5654e-09	9.96084e-08	5.4209e-08	3173	tags=53%	list=21%	signal=42%	3162/7040/406888/7422/54567/3091/51378/25/8817/4215/574506/387/2113/2260/10519/3315/406943/9734/7114/22846/51564/9314/161742/406913/4846/10769/301/284/57608/5587/5606/8829/1969/6915/28984/2247/958/79812/285/57381/6776/94/7424/27286/5155/407006/406994/5743/7057
GO:0032680	GO:0032680	regulation of tumor necrosis factor production	123	-0.523215	-2.22908	5.69282e-09	1.01302e-07	5.51305e-08	2318	tags=42%	list=15%	signal=36%	5788/384/602/9261/3315/406919/26137/1191/27202/84868/64127/23208/558/54440/3586/1535/5724/51738/7128/284/64170/26191/10457/2621/948/7291/2207/5295/23643/10859/3965/3133/7097/64581/80149/7305/945/7098/11213/947/7099/1536/140885/7096/64115/6348/54206/929/7538/54209/3479/7057
GO:0010634	GO:0010634	positive regulation of epithelial cell migration	133	-0.518121	-2.24415	5.71032e-09	1.01302e-07	5.51305e-08	3173	tags=53%	list=21%	signal=42%	3162/7040/406888/2324/382/6714/80005/7422/3091/51378/25/8817/4215/1793/2113/2260/10519/3315/8828/5581/2896/9734/7114/9647/8754/51564/3037/7010/406913/64094/5641/4846/10769/9037/301/284/57608/5587/5606/8829/9922/4318/2246/388/2247/8613/1512/5168/9564/23328/958/152007/57381/3690/80149/6776/84913/25960/7424/1839/27286/6678/652/7048/5155/3725/407006/5743/7057/2252
GO:0050921	GO:0050921	positive regulation of chemotaxis	108	-0.546595	-2.29115	6.17242e-09	1.09019e-07	5.93305e-08	2085	tags=40%	list=14%	signal=35%	7114/9647/3071/1902/6810/64094/5641/9037/3603/9750/5587/8829/2621/2247/1901/5159/1240/3965/199/1435/7857/59341/1230/719/1012/6351/5228/7424/8291/972/5155/6348/80310/54209/9547/5919/9353/5054/6387/2152/5764/7057/3569
GO:0002688	GO:0002688	regulation of leukocyte chemotaxis	88	-0.581356	-2.37034	6.26166e-09	1.10112e-07	5.99254e-08	2594	tags=45%	list=17%	signal=38%	7423/23075/728/56833/80024/83700/27202/3071/683/5641/26585/9750/79148/2621/4067/4354/1240/3965/6347/199/1435/59341/1230/719/6351/1843/5228/7424/8291/972/6348/4681/9547/5919/9353/5054/6387/5764/7057/3569
GO:1903556	GO:1903556	negative regulation of tumor necrosis factor superfamily cytokine production	49	-0.673555	-2.47842	6.63182e-09	1.16114e-07	6.3192e-08	2563	tags=55%	list=17%	signal=46%	29126/384/602/406919/27202/84868/23208/558/3586/51738/7128/26191/10457/2621/7291/10859/3965/80149/945/11213/947/7099/140885/64115/54206/54209/3479
GO:0008360	GO:0008360	regulation of cell shape	139	-0.503931	-2.19642	6.91761e-09	1.20594e-07	6.56298e-08	2551	tags=41%	list=17%	signal=34%	389/3679/57194/54873/387/391/91010/5362/9948/89846/30011/64218/752/4478/1902/116985/10458/6284/10435/2245/301/5365/23433/221472/7168/388/22836/4627/390/58480/148170/161176/3055/7940/2059/6347/152273/55742/57381/10602/10979/3383/10810/157285/2335/2039/3689/11135/23129/23136/93663/29984/1436/10395/6348/10630/5764
GO:0032508	GO:0032508	DNA duplex unwinding	107	0.53418	2.22706	7.2661e-09	1.26123e-07	6.8639e-08	4369	tags=52%	list=29%	signal=38%	641/7153/8318/51659/9837/9401/4173/10721/84296/5983/54821/80119/4171/83990/79075/5888/5984/4174/63922/84515/4172/5985/1663/4176/1107/165545/2966/5982/25788/56652/1161/8607/1763/57680/84083/142/54617/10856/4361/3159/9978/79913/4175/6117/4683/1660/56897/55636/8451/56852/1108/5965/9400/9557/2967/7520
GO:0032715	GO:0032715	negative regulation of interleukin-6 production	36	-0.738586	-2.54554	7.50302e-09	1.29677e-07	7.05728e-08	2477	tags=56%	list=16%	signal=47%	9655/7124/27202/84868/3071/23208/3586/51738/7128/26191/2621/3082/114899/131450/3635/80149/11213/7099/140885/10365
GO:0110053	GO:0110053	regulation of actin filament organization	230	-0.431496	-1.99257	8.04204e-09	1.38399e-07	7.53195e-08	2655	tags=34%	list=17%	signal=28%	653857/23189/6422/389/10109/23075/7408/51466/387/5581/85358/832/9948/11344/80206/7114/9647/10095/3071/7454/55243/1902/116985/10458/5063/51332/9886/9535/10435/55616/2316/3059/9037/50944/4070/50507/8829/5829/29767/10174/22998/91663/7984/28984/7168/1901/171024/57731/5295/8477/148170/29109/10411/10391/3055/2059/90102/10602/51474/3383/5341/22899/2039/79822/55160/11135/2934/163782/93663/10395/7043/2006…
GO:0034080	GO:0034080	CENP-A containing nucleosome assembly	30	0.755092	2.4147	8.25531e-09	1.40865e-07	7.66617e-08	2191	tags=63%	list=14%	signal=54%	11339/55355/57082/1058/79682/79019/79172/64105/64946/54069/2491/387103/55839/91687/55166/378708/4678/8607/55320
GO:0061641	GO:0061641	CENP-A containing chromatin organization	30	0.755092	2.4147	8.25531e-09	1.40865e-07	7.66617e-08	2191	tags=63%	list=14%	signal=54%	11339/55355/57082/1058/79682/79019/79172/64105/64946/54069/2491/387103/55839/91687/55166/378708/4678/8607/55320
GO:1902106	GO:1902106	negative regulation of leukocyte differentiation	76	-0.596491	-2.3737	8.35664e-09	1.41992e-07	7.72753e-08	1707	tags=43%	list=11%	signal=39%	140685/84807/11025/11006/84959/301/1840/4067/10272/9935/5295/55365/10859/604/10234/861/4092/3635/3718/80149/2200/28959/2213/7098/4609/7099/714/972/652/2737/6348/3566/3624
GO:0031497	GO:0031497	chromatin assembly	113	0.529081	2.21645	8.68817e-09	1.47005e-07	8.00034e-08	3682	tags=42%	list=24%	signal=32%	11339/55355/57082/55723/1058/79682/79019/79172/64105/64946/8091/4171/54069/10036/4674/2491/3070/387103/3148/55839/57673/91687/55166/8208/201161/6662/378708/146059/26155/4678/8607/8520/79829/55320/23347/10155/25842/201254/5928/1786/6418/85453/3159/6839/54107/4676/80312/5931
GO:0033048	GO:0033048	negative regulation of mitotic sister chromatid segregation	41	0.693412	2.38479	8.86977e-09	1.4945e-07	8.13339e-08	891	tags=41%	list=6%	signal=39%	891/7272/991/9232/9212/701/699/5347/10403/84101/9319/26271/4085/54908/1063/81620/7517
GO:0051383	GO:0051383	kinetochore organization	21	0.808109	2.36392	8.91294e-09	1.49552e-07	8.13892e-08	848	tags=57%	list=6%	signal=54%	83540/1058/1062/10403/64105/64946/1063/10592/387103/10051/81620/55839
GO:0030071	GO:0030071	regulation of mitotic metaphase/anaphase transition	51	0.665697	2.38203	9.07855e-09	1.51698e-07	8.25575e-08	891	tags=39%	list=6%	signal=37%	891/7272/9787/991/9212/701/9700/699/990/1062/5347/10403/84101/9319/26271/4085/54908/1063/81620/7517
GO:0003012	GO:0003012	muscle system process	352	-0.38842	-1.87318	9.36148e-09	1.5578e-07	8.47786e-08	1823	tags=25%	list=12%	signal=22%	23336/10203/9464/7442/4660/28999/7414/3356/5592/4846/2316/1535/5997/5724/6722/92241/51738/7094/5606/5829/7871/8913/3784/6781/6915/29767/10174/10611/1910/3553/7168/2702/8470/72/8877/7171/4092/199/4634/10398/3693/7431/10848/800/4000/2308/857/4608/80149/3778/6261/7133/5733/6525/8013/4629/10052/2775/147/8291/2934/4638/23213/1145/3759/10008/55959/1311/59/255743/54206/10580/4621/1490/6444/8082/26509/28…
GO:0007080	GO:0007080	mitotic metaphase plate congression	43	0.685501	2.38101	1.02433e-08	1.69751e-07	9.23823e-08	787	tags=33%	list=5%	signal=31%	891/83540/3833/81930/9928/11004/113130/55143/1062/10403/54908/3835/81620/23212
GO:0034728	GO:0034728	nucleosome organization	97	0.55033	2.2551	1.12331e-08	1.85392e-07	1.00894e-07	3682	tags=42%	list=24%	signal=32%	11339/55355/57082/55723/1058/79682/79019/79172/64105/64946/4171/54069/10036/4674/2491/387103/3148/55839/91687/55166/8208/6662/378708/4678/8607/8520/55320/25842/201254/11198/54617/5928/6418/85453/3159/81611/6944/54107/4676/6605/5931
GO:0006333	GO:0006333	chromatin assembly or disassembly	136	0.488204	2.11747	1.14383e-08	1.88009e-07	1.02318e-07	3682	tags=40%	list=24%	signal=30%	11339/55355/57082/55723/1058/79682/79019/79172/64105/64946/8091/4171/54069/10036/4674/2491/3070/387103/3148/55839/57673/91687/79723/55166/8208/1107/201161/6662/378708/146059/26155/4678/8607/8520/79829/55320/23347/10155/25842/201254/11198/5928/1786/6418/85453/3159/6839/8479/54107/9874/4676/80312/6605/5931
GO:0000281	GO:0000281	mitotic cytokinesis	70	0.593111	2.27855	1.15633e-08	1.89291e-07	1.03016e-07	1462	tags=30%	list=10%	signal=27%	51203/54443/10112/1058/9700/24137/29127/5347/3925/9585/11113/1894/9493/55165/3619/81620/55521/26586/675/9475/288
GO:0007265	GO:0007265	Ras protein signal transduction	412	-0.364553	-1.78228	1.23112e-08	2.00717e-07	1.09234e-07	2218	tags=27%	list=14%	signal=24%	387/8729/25780/153090/391/143872/55647/57449/115727/83871/89846/1026/25837/286530/3688/7454/7409/83892/9411/9289/30851/1902/23362/9886/64284/6464/10435/128272/5873/389337/2057/3707/81848/9402/10769/10156/4804/2245/392/142684/397/9750/11020/5587/8829/9912/9922/5337/8660/23433/54922/5175/9828/221472/4067/7984/22808/388/2247/22836/9002/10161/5159/390/27/8477/58480/148170/604/10411/2828/6091/79567/20…
GO:0006270	GO:0006270	DNA replication initiation	35	0.729818	2.39602	1.24953e-08	2.02898e-07	1.10421e-07	3558	tags=80%	list=23%	signal=62%	8318/55388/9134/990/4173/4998/90381/4171/5427/898/4174/81620/4172/5557/4176/5426/23649/5558/4999/1017/5000/5422/23595/57418/23594/4175/54107/4683
GO:0060333	GO:0060333	interferon-gamma-mediated signaling pathway	80	-0.588454	-2.36547	1.27198e-08	2.05713e-07	1.11953e-07	2137	tags=54%	list=14%	signal=46%	55223/817/3659/9111/10437/3394/567/3134/4939/53840/10346/3117/3106/10475/4940/3663/3105/5724/83666/3107/3120/6672/5371/81603/54625/3055/3115/3133/4938/9021/3383/960/3113/3127/3119/3122/2634/84166/4261/3123/2210/2633/2209
GO:0048771	GO:0048771	tissue remodeling	137	-0.50375	-2.18458	1.32706e-08	2.13763e-07	1.16334e-07	2072	tags=34%	list=14%	signal=30%	1471/79705/8996/9464/558/9066/3606/760/4846/3988/26585/84959/7128/301/10457/50507/1969/5027/4054/2702/1901/6696/10312/1200/3635/857/9770/1956/3690/4323/8792/94/633/1636/115908/1513/2034/1436/7421/1464/7043/338773/3200/5764/4313/3976/3569
GO:0070665	GO:0070665	positive regulation of leukocyte proliferation	104	-0.541777	-2.25986	1.33841e-08	2.14733e-07	1.16862e-07	2580	tags=48%	list=17%	signal=40%	5788/29126/3485/283234/975/916/1880/84868/1026/3071/683/80381/54440/3606/301/10673/8660/84433/4067/1604/3553/920/941/604/3965/942/3115/199/10288/958/3133/1435/596/23529/8744/3718/3109/64926/3113/3559/7099/684/80380/30835/972/7048/940/3479/4773/3569
GO:2001251	GO:2001251	negative regulation of chromosome organization	125	0.50047	2.14819	1.35958e-08	2.17262e-07	1.18239e-07	3683	tags=42%	list=24%	signal=32%	891/7272/991/7153/9232/9212/701/9700/699/5347/10403/84101/9319/29028/26271/4085/54908/1063/80119/4171/81620/1789/7517/55170/10459/3720/54880/26155/5885/348654/672/6879/25842/142/548593/55611/9184/55011/1786/6418/7515/167227/79008/3159/84464/51366/9183/23028/4683/80312/55755/55226/3183
GO:0051250	GO:0051250	negative regulation of lymphocyte activation	113	-0.528157	-2.23217	1.37082e-08	2.18193e-07	1.18745e-07	2884	tags=49%	list=19%	signal=40%	3659/51043/135/3620/10875/6422/29126/384/9655/8764/3134/84868/695/11314/1845/558/84807/3586/7128/301/9750/26191/10457/55824/1840/64092/2615/4067/941/1051/10859/604/861/3965/7940/942/4092/10288/3635/3718/80149/7305/2213/3559/79626/80380/972/64115/652/2737/4332/3077/3566/3624/11326
GO:0002764	GO:0002764	immune response-regulating signaling pathway	341	-0.389541	-1.87096	1.3786e-08	2.18567e-07	1.18949e-07	2851	tags=31%	list=19%	signal=26%	7456/4772/5698/1540/25/10603/3385/5970/200958/3783/123920/5788/59338/5583/10109/1793/728/5696/975/11119/916/5581/5336/1997/974/5142/933/27202/695/7462/55198/3117/919/9473/4790/10095/3071/7454/7409/4340/3384/11314/10384/1845/10458/5063/6464/84807/80381/11118/11006/9402/2353/5293/64170/26191/3120/55824/84433/2359/4067/5699/64005/2207/5295/920/1240/2357/10859/1512/9564/861/3055/2533/5359/3115/131450…
GO:0010389	GO:0010389	regulation of G2/M transition of mitotic cell cycle	186	0.450479	2.03543	1.45673e-08	2.3003e-07	1.25187e-07	3632	tags=39%	list=24%	signal=30%	641/891/3161/995/9212/22974/983/9928/5569/6790/63967/990/51514/5347/10733/4998/993/8091/26271/90381/1063/7480/8317/4751/22995/11073/8883/10383/55722/84131/595/121441/219736/9793/9738/55142/3306/7283/5683/5885/54801/9702/93323/672/5884/115106/55835/5694/7531/1017/79959/29980/5889/80174/10213/11116/3364/79441/5695/55125/203068/4361/9978/22981/5687/9662/80321/5702/4683/5685/1781/55755
GO:0031570	GO:0031570	DNA integrity checkpoint	154	0.472311	2.07475	1.46232e-08	2.3003e-07	1.25187e-07	2735	tags=32%	list=18%	signal=26%	641/891/7153/995/8318/1869/983/6790/144455/2810/63967/990/1111/51512/51514/5347/79733/4998/8091/90381/146956/83990/4436/8914/79968/81620/11073/8883/5111/595/5810/11200/65975/25896/9984/5591/55159/1763/54465/672/83695/5884/1027/1017/29980/57472/54962/3364/7155
GO:0030261	GO:0030261	chromosome condensation	30	0.748355	2.39316	1.46841e-08	2.30089e-07	1.25219e-07	1446	tags=47%	list=9%	signal=42%	891/51203/7153/64151/23397/983/113130/8091/54892/10592/9918/10051/23310/26993
GO:1903707	GO:1903707	negative regulation of hemopoiesis	107	-0.542226	-2.27334	1.50261e-08	2.34536e-07	1.27639e-07	1707	tags=36%	list=11%	signal=33%	84807/11025/11006/3707/84959/4792/301/1840/4067/10272/9935/5295/6886/55365/10859/677/604/10234/861/4092/3635/3718/80149/2200/28959/2213/7098/4609/7099/714/972/652/2737/6348/3566/3624/407006/7538/4212
GO:0061900	GO:0061900	glial cell activation	45	-0.691253	-2.49314	1.51572e-08	2.35669e-07	1.28256e-07	2866	tags=67%	list=19%	signal=54%	90865/135/5788/728/7124/3949/2896/1191/7442/25825/9572/3684/3553/8877/199/8530/10135/7097/1956/7305/7098/3689/51284/4035/6348/712/3725/6608/54209/3569
GO:0097191	GO:0097191	extrinsic apoptotic signaling pathway	197	-0.454172	-2.07005	1.60247e-08	2.45858e-07	1.33801e-07	2603	tags=32%	list=17%	signal=27%	2852/5788/6422/3303/8682/7185/7124/8717/2260/10519/7132/153090/1612/2876/8996/8743/57630/6810/9531/4846/3685/2537/7128/8829/5979/6672/467/5371/5027/4055/4170/51330/3553/5295/6498/3082/147138/596/4000/857/7857/50486/8406/3383/7133/23017/219699/7098/355/3429/8742/652/2070/85450/7078/3624/7046/407006/64798/5054/6934/3479/7057/6423
GO:1905819	GO:1905819	negative regulation of chromosome separation	38	0.699755	2.36914	1.60562e-08	2.45858e-07	1.33801e-07	891	tags=45%	list=6%	signal=42%	891/7272/991/9232/9212/701/699/5347/10403/84101/9319/26271/4085/54908/1063/81620/7517
GO:2000816	GO:2000816	negative regulation of mitotic sister chromatid separation	38	0.699755	2.36914	1.60562e-08	2.45858e-07	1.33801e-07	891	tags=45%	list=6%	signal=42%	891/7272/991/9232/9212/701/699/5347/10403/84101/9319/26271/4085/54908/1063/81620/7517
GO:0031214	GO:0031214	biomineral tissue development	128	-0.514374	-2.20731	1.61635e-08	2.45858e-07	1.33801e-07	1683	tags=33%	list=11%	signal=29%	7286/4846/26585/91461/5552/7123/10457/56172/5027/2621/7291/4054/1901/6696/1051/5744/10312/302/2308/1230/54829/144347/4256/652/359845/1893/1311/4920/54757/6348/7043/4921/1277/1278/338773/2824/3479/3491/5743/5764/4015/5167
GO:0110148	GO:0110148	biomineralization	128	-0.514374	-2.20731	1.61635e-08	2.45858e-07	1.33801e-07	1683	tags=33%	list=11%	signal=29%	7286/4846/26585/91461/5552/7123/10457/56172/5027/2621/7291/4054/1901/6696/1051/5744/10312/302/2308/1230/54829/144347/4256/652/359845/1893/1311/4920/54757/6348/7043/4921/1277/1278/338773/2824/3479/3491/5743/5764/4015/5167
GO:0043405	GO:0043405	regulation of MAP kinase activity	296	-0.402473	-1.91326	1.61789e-08	2.45858e-07	1.33801e-07	2677	tags=33%	list=17%	signal=28%	8817/200958/9518/5788/6422/4215/7316/8682/9500/2914/728/1850/7124/6609/975/2260/3654/1848/9261/153090/10221/28951/3611/9064/8754/1847/23043/197259/5470/1849/5998/11314/64127/1902/161742/1845/5063/6464/3356/5997/81848/51738/26191/3656/8322/50507/5606/5979/200734/5027/9294/9020/29969/11221/23533/221472/4067/2246/7984/3553/2247/5159/2321/3082/2357/10019/3643/6091/23328/958/9839/7039/857/1956/7345/87…
GO:0050663	GO:0050663	cytokine secretion	174	-0.464415	-2.08712	1.63524e-08	2.47561e-07	1.34728e-07	2110	tags=37%	list=14%	signal=32%	27202/9734/84868/7114/1992/114769/834/64127/23208/6284/192683/11118/3586/3685/51738/5552/7128/301/284/26191/5371/5027/2615/2621/948/7291/84433/4067/28984/3553/4155/247/10631/9173/23601/114548/114899/10859/3965/113277/10312/131450/199/22861/3937/7097/59341/80149/7133/2335/2213/947/7099/8291/7096/1436/4035/6348/929/3566/8840/5008/2633/284297
GO:0002768	GO:0002768	immune response-regulating cell surface receptor signaling pathway	338	-0.386305	-1.85198	1.81227e-08	2.73125e-07	1.48641e-07	2851	tags=31%	list=19%	signal=26%	7456/4772/5698/1540/25/10603/3385/5970/200958/3783/123920/5788/59338/5583/10109/1793/728/5696/975/11119/916/5581/5336/1997/974/5142/933/27202/695/7462/55198/3117/919/9473/4790/10095/3071/7454/7409/4340/3384/11314/10384/1845/10458/5063/6464/84807/80381/11118/11006/9402/2353/5293/64170/26191/3120/55824/84433/2359/4067/5699/64005/2207/5295/920/1240/2357/10859/9564/861/3055/2533/5359/3115/131450/1028…
GO:0002224	GO:0002224	toll-like receptor signaling pathway	120	-0.520359	-2.21798	1.81767e-08	2.73125e-07	1.48641e-07	2499	tags=42%	list=16%	signal=35%	3659/148022/81622/4615/7316/353376/91543/3654/9261/5581/153090/23151/23098/84868/695/55198/11314/5641/1535/4792/1514/7128/9572/26191/3656/1520/3684/1508/948/4067/146722/118788/23643/81035/6279/2099/7097/857/23180/338382/7098/11213/7099/3689/7096/51284/1513/929/6280/9865
GO:0050000	GO:0050000	chromosome localization	71	0.596296	2.30383	1.83554e-08	2.74784e-07	1.49543e-07	2017	tags=34%	list=13%	signal=29%	891/83540/9787/3833/81930/9928/11004/113130/55143/1062/10403/10615/81610/54908/1063/3835/81620/23212/55166/147872/8697/284071/79003/150365
GO:0030217	GO:0030217	T cell differentiation	197	-0.453264	-2.06591	1.84344e-08	2.74945e-07	1.49631e-07	3043	tags=42%	list=20%	signal=34%	7292/57178/912/4860/54567/538/3659/51043/1540/25/10875/5788/567/602/9655/387/91543/916/8324/10538/1880/6774/64218/3071/7409/9308/57630/84807/54440/3606/11006/3707/6722/678/56603/301/5293/26191/1840/23210/9580/11221/11035/84433/9935/2207/920/941/114548/677/604/861/3965/942/10312/6935/4092/10288/596/8744/3718/3111/1794/80149/1958/3955/8809/3559/1960/972/8325/64115/652/7048/2737/3566/940/1378/64332/…
GO:0002253	GO:0002253	activation of immune response	374	-0.373987	-1.81603	1.92209e-08	2.85618e-07	1.5544e-07	2669	tags=30%	list=17%	signal=26%	5970/200958/3783/123920/5788/59338/5583/10109/1793/728/5696/3075/975/11119/1675/3426/916/721/629/5581/5336/1191/1997/974/5142/966/933/27202/695/7462/55198/3117/115004/919/9473/4790/10095/3071/7454/7409/4340/3384/11314/10384/1845/10458/5063/720/84807/80381/11118/11006/9402/717/5293/64170/26191/3120/55824/84433/2359/4067/28984/1604/3553/5699/64005/2207/5295/920/1240/2357/9564/861/3055/2533/5359/718…
GO:1903038	GO:1903038	negative regulation of leukocyte cell-cell adhesion	97	-0.557823	-2.31512	1.9334e-08	2.86243e-07	1.55779e-07	2884	tags=51%	list=19%	signal=41%	3659/51043/135/3620/10875/5465/29126/384/9655/8764/84868/9314/11314/1845/84807/3586/301/9750/26191/10457/55824/1840/2615/941/445/1051/10859/604/861/3965/942/4092/10288/3718/80149/406890/2213/3559/79626/80380/972/64115/652/2737/3077/3566/407006/11326/6387
GO:0030224	GO:0030224	monocyte differentiation	29	-0.760422	-2.48066	1.98025e-08	2.91038e-07	1.58389e-07	1122	tags=45%	list=7%	signal=42%	5153/4627/920/677/1435/146433/3635/4609/972/3428/652/1436/3725
GO:1903131	GO:1903131	mononuclear cell differentiation	29	-0.760422	-2.48066	1.98025e-08	2.91038e-07	1.58389e-07	1122	tags=45%	list=7%	signal=42%	5153/4627/920/677/1435/146433/3635/4609/972/3428/652/1436/3725
GO:0032720	GO:0032720	negative regulation of tumor necrosis factor production	48	-0.674237	-2.44937	2.12984e-08	3.11886e-07	1.69735e-07	2519	tags=54%	list=16%	signal=45%	384/602/406919/27202/84868/23208/558/3586/51738/7128/26191/10457/2621/7291/10859/3965/80149/945/11213/947/7099/140885/64115/54206/54209/3479
GO:0045670	GO:0045670	regulation of osteoclast differentiation	49	-0.661755	-2.435	2.22128e-08	3.24097e-07	1.76381e-07	1646	tags=45%	list=11%	signal=40%	760/11025/11006/84959/7030/2353/10272/9935/5295/1051/10859/10234/1435/3635/9770/1230/2200/7305/7098/7099/6348/54209
GO:0031348	GO:0031348	negative regulation of defense response	177	-0.454799	-2.04467	2.27545e-08	3.30802e-07	1.8003e-07	2905	tags=40%	list=19%	signal=33%	5176/197358/135/9111/10875/5465/10225/89790/215/2852/5788/384/9655/56833/6397/79132/2113/3949/7132/2896/114132/3134/5467/84868/2876/55198/113/4790/9314/10475/10203/7010/3586/406913/51738/7128/9572/58189/11221/54625/114548/3082/114899/10859/3965/131450/8530/3133/9021/100500826/80149/7133/406890/2213/3559/79626/11213/1003/140885/284207/84166/3428/7130/4907/710/407006/1378/11326/5740/3479/5654
GO:0070372	GO:0070372	regulation of ERK1 and ERK2 cascade	229	-0.434473	-2.00528	2.28682e-08	3.3126e-07	1.80279e-07	1821	tags=29%	list=12%	signal=26%	64127/9464/161742/1845/7010/6464/57007/406913/3356/81848/284/26191/10457/50507/8829/1969/467/2621/55450/948/11221/4067/3553/2247/5159/920/2321/3965/6347/152007/10268/1956/59341/1230/3383/8792/960/2335/5322/2192/7099/6351/1843/140885/8482/10252/972/5156/652/112464/5155/1436/4035/6348/255743/54206/80310/3725/6349/7078/1490/11117/407006/54209/3491/2633/3976
GO:0051051	GO:0051051	negative regulation of transport	406	-0.372126	-1.81179	2.37453e-08	3.42733e-07	1.86522e-07	2578	tags=29%	list=17%	signal=25%	57520/6422/90007/1407/384/3303/8682/2771/23072/8301/2859/7124/1113/7349/64285/88455/91543/2917/7132/5581/10550/3134/54899/933/27202/9734/7114/9647/1992/55198/23479/5311/114769/4790/11314/9882/23208/4129/192683/3586/3356/9531/4846/3589/5997/3685/6386/91461/51738/392/5552/7128/114088/301/284/26191/5587/6672/8660/6781/5371/2615/2621/6690/948/29969/7291/4318/28984/3553/146722/114548/114899/257364/108…
GO:0043491	GO:0043491	protein kinase B signaling	205	-0.449947	-2.05584	2.47484e-08	3.55935e-07	1.93707e-07	1937	tags=35%	list=13%	signal=31%	8817/9518/22876/2852/4534/59338/5526/7124/2260/10519/391/3611/2876/3688/9314/7409/2159/9863/7010/558/406913/3606/3059/9037/5293/284/50507/1969/5979/8660/2621/23533/2246/3553/2247/118788/5159/5295/941/3082/10019/677/3643/942/6347/114897/958/2099/10268/7039/1956/2022/375033/1839/5156/112464/5155/57333/6348/1263/940/7046/407006/3480/6934/3479/5008/2152/4015/7057/2252
GO:0043486	GO:0043486	histone exchange	41	0.68186	2.34506	2.68066e-08	3.84165e-07	2.0907e-07	3366	tags=59%	list=22%	signal=46%	11339/55355/57082/1058/79682/79019/79172/64105/64946/54069/2491/387103/55839/91687/55166/378708/4678/8607/55320/201254/5928/81611/6944/54107
GO:0072593	GO:0072593	reactive oxygen species metabolic process	225	-0.425591	-1.96691	2.71242e-08	3.87338e-07	2.10797e-07	2362	tags=32%	list=15%	signal=27%	384/2771/7124/387/8729/2902/4688/53905/1191/2876/1026/6774/5311/9314/7409/378/4129/683/7442/3586/5873/4846/1535/2537/50507/3684/5027/2878/948/11035/54541/50506/3553/5159/3048/445/3643/113277/4689/6542/199/596/7097/55022/2308/9644/857/1956/64581/80149/7305/3383/90527/1545/947/7099/3689/1536/140885/7048/5155/6649/375387/10365/1490/10516/5740/406994/3491/22925/5743/7057
GO:0051310	GO:0051310	metaphase plate congression	55	0.627381	2.26959	2.73374e-08	3.89003e-07	2.11704e-07	787	tags=31%	list=5%	signal=29%	891/83540/3833/81930/9928/11004/113130/55143/1062/10403/10615/81610/54908/1063/3835/81620/23212
GO:0070126	GO:0070126	mitochondrial translational termination	89	0.544733	2.20405	2.88885e-08	4.09626e-07	2.22927e-07	4784	tags=70%	list=31%	signal=48%	54148/64968/92259/29093/51318/28998/64965/65008/54534/51258/57129/64983/3396/51373/23107/84340/64960/28977/55168/56945/55173/64978/10884/60488/219927/740/10573/79590/64951/65080/64979/51116/51253/11222/26589/6150/65005/54516/51264/51649/54460/55037/51023/90480/122704/9553/51642/28957/84311/51069/51263/5018/51081/54948/65993/28973/64976/6183/9801/29088/64928/54998
GO:0030168	GO:0030168	platelet activation	129	-0.507695	-2.18532	2.92114e-08	4.12752e-07	2.24628e-07	2296	tags=39%	list=15%	signal=33%	3315/5581/2776/5336/3611/2157/7409/558/7414/5592/4846/2316/84959/6722/7094/3709/10077/2621/83706/23533/4067/9002/2207/4627/5295/10019/5359/114897/958/3937/10398/3690/5341/375033/2039/2769/7099/9162/7056/5156/1465/5155/1311/5270/1281/10630/7450/1277/1278/3569
GO:0050878	GO:0050878	regulation of body fluid levels	375	-0.378152	-1.83695	2.95859e-08	4.16582e-07	2.26713e-07	2296	tags=27%	list=15%	signal=24%	3315/5581/2776/832/107/5336/3611/966/8858/4939/2157/113/9612/3037/7454/7409/2159/953/558/7414/5592/5873/4846/2316/1535/84959/196883/6722/56603/7094/81704/3709/10077/6915/5027/2621/948/83706/1910/66002/23533/4067/2702/9002/2207/4627/5295/3048/10019/10391/5359/114897/958/302/3937/10398/57572/857/3291/3690/59341/79864/5327/5341/187/139818/375033/2039/6776/2769/9060/308/947/2192/7099/9162/7056/23764/…
GO:0046631	GO:0046631	alpha-beta T cell activation	112	-0.526928	-2.21992	3.11228e-08	4.36695e-07	2.37659e-07	3043	tags=52%	list=20%	signal=42%	7292/10808/4860/538/3659/51043/135/25/5788/29126/384/602/9655/975/387/91543/916/10538/8764/1880/60437/6774/64218/3071/11314/9308/57630/2000/84807/54440/3606/3707/301/1604/941/114548/10859/604/861/3965/942/10312/4092/3133/596/3718/1794/80149/64926/8809/64115/7048/2737/3077/3566/940/64332/3569
GO:0006897	GO:0006897	endocytosis	474	-0.350202	-1.72549	3.19054e-08	4.46122e-07	2.42789e-07	2605	tags=27%	list=17%	signal=23%	22876/10266/8542/3959/4037/567/10267/1793/54453/8301/261729/975/88455/3426/9261/3949/26052/1759/10188/5336/55647/1191/51411/81/83871/933/30011/30844/55198/9332/858/9902/3688/3071/7454/57555/11314/9863/10203/23208/9886/64284/57007/558/4240/192683/9260/26585/6386/7275/286046/284/3587/79958/5587/3684/23210/23433/948/201176/6616/64129/54413/2207/9322/84439/56241/4627/10043/27/257364/8877/8578/58480/9…
GO:0007018	GO:0007018	microtubule-based movement	247	0.40921	1.89389	3.3215e-08	4.62827e-07	2.5188e-07	3037	tags=26%	list=20%	signal=21%	9787/3833/81930/10112/146909/9928/11004/1062/24137/29127/113220/3832/347240/56992/66000/361/9585/92558/9493/3835/53340/56683/90990/25893/79740/26074/25911/3796/92104/127602/80128/26153/89891/92749/55036/547/117178/3798/126820/146754/8632/51668/5590/55130/57519/254263/55686/150737/200373/4133/4137/320/115948/255758/147700/26256/126731/27285/55605/23353/54919/11127/6421/8195/161582
GO:0022604	GO:0022604	regulation of cell morphogenesis	430	-0.358542	-1.75451	3.45091e-08	4.79201e-07	2.60791e-07	2633	tags=32%	list=17%	signal=27%	221061/23189/283149/79006/8874/57520/389/10109/26259/3679/57194/1793/23072/201294/54873/387/6092/10519/2902/26052/51393/10509/85358/832/23499/391/91010/5362/3611/9948/192670/81/11344/23098/89846/30011/64218/752/4478/3037/23043/126374/1902/116985/10458/5063/6284/10435/57154/56920/2316/6405/23111/6722/4804/2245/9037/301/4070/8322/8829/9912/5365/5979/23433/65249/10611/3987/221472/91663/51330/7168/38…
GO:0031023	GO:0031023	microtubule organizing center organization	126	0.490459	2.10377	3.74306e-08	5.17982e-07	2.81897e-07	3036	tags=40%	list=20%	signal=33%	983/6790/1111/3832/5347/6491/151648/10733/25886/899/284403/64793/4751/22995/163786/7517/55722/84612/9768/675/9475/117178/1107/7516/9793/9738/55142/85459/137886/29901/84552/54801/5902/7514/50855/348654/93323/6566/672/25914/115106/55835/1070/1017/4591/79959/79441/26973/11127/55125/116840
GO:0042129	GO:0042129	regulation of T cell proliferation	117	-0.523315	-2.22683	3.81486e-08	5.26112e-07	2.86321e-07	3162	tags=50%	list=21%	signal=40%	7040/8767/5074/7292/912/4860/8440/3659/51043/3620/5788/29126/384/3485/283234/975/916/8764/84868/3071/57630/80381/54440/3586/3606/301/10457/10673/2615/11035/84433/1604/3553/920/941/1051/10859/3965/942/3115/199/10288/3133/8744/3718/3109/64926/7133/3113/3559/80380/30835/64115/652/7048/940/11326/3479/3569
GO:0032946	GO:0032946	positive regulation of mononuclear cell proliferation	101	-0.543643	-2.25847	4.0968e-08	5.63065e-07	3.06432e-07	2580	tags=48%	list=17%	signal=40%	5788/29126/3485/283234/975/916/1880/84868/1026/3071/683/80381/54440/3606/301/10673/8660/84433/1604/3553/920/941/604/3965/942/3115/199/10288/958/3133/1435/596/23529/8744/3718/3109/64926/3113/3559/7099/80380/30835/972/7048/940/3479/4773/3569
GO:0001649	GO:0001649	osteoblast differentiation	184	-0.452633	-2.04265	4.38312e-08	6.00369e-07	3.26733e-07	2031	tags=29%	list=13%	signal=25%	4209/10140/8519/51564/9902/6497/8321/9464/9260/26585/10457/5587/1969/7291/3727/58476/23051/23601/6696/3486/3082/1051/5744/7171/10312/9770/1291/3399/1462/3371/3726/8482/115908/1052/652/2737/6615/6348/255743/90993/3400/4921/6608/1277/338773/8840/3479/3491/860/4015/22801/3569/6423
GO:0009306	GO:0009306	protein secretion	455	-0.356517	-1.75048	4.49923e-08	6.12108e-07	3.33122e-07	2128	tags=25%	list=14%	signal=22%	5467/933/27202/9734/84868/8864/7114/1992/8754/9501/114769/834/399687/57555/64175/3557/5452/64127/3790/23208/6284/192683/11118/9066/3586/6810/3685/51738/5552/7128/9572/301/284/26191/3709/6623/6513/10673/8660/5371/5027/2615/2621/948/7291/55107/84433/1803/4067/28984/3553/2702/4155/6616/247/379/10631/9173/23601/114548/114899/10859/10411/3382/3965/113277/10312/131450/199/8447/958/22861/3937/3133/7097/…
GO:0035592	GO:0035592	establishment of protein localization to extracellular region	455	-0.356517	-1.75048	4.49923e-08	6.12108e-07	3.33122e-07	2128	tags=25%	list=14%	signal=22%	5467/933/27202/9734/84868/8864/7114/1992/8754/9501/114769/834/399687/57555/64175/3557/5452/64127/3790/23208/6284/192683/11118/9066/3586/6810/3685/51738/5552/7128/9572/301/284/26191/3709/6623/6513/10673/8660/5371/5027/2615/2621/948/7291/55107/84433/1803/4067/28984/3553/2702/4155/6616/247/379/10631/9173/23601/114548/114899/10859/10411/3382/3965/113277/10312/131450/199/8447/958/22861/3937/3133/7097/…
GO:0051090	GO:0051090	regulation of DNA-binding transcription factor activity	360	-0.371567	-1.79536	4.8039e-08	6.51358e-07	3.54483e-07	2555	tags=29%	list=17%	signal=25%	4615/26508/5583/5526/3303/7316/7185/133522/7124/11043/8717/1611/3654/10519/153090/107/10221/1191/53840/84868/7114/695/10346/6774/9830/51341/5311/114769/4790/9314/8321/10475/64127/9464/84807/3586/3606/825/2316/266977/6722/4792/3059/7128/2353/92565/3656/8322/5587/6672/84875/2621/948/7291/81603/11035/5292/84433/7984/28984/3553/9208/8613/1240/114548/8877/84159/2307/3965/3055/4092/6279/958/2099/7097/8…
GO:0009612	GO:0009612	response to mechanical stimulus	176	-0.455883	-2.05046	4.84148e-08	6.5425e-07	3.56057e-07	2388	tags=35%	list=16%	signal=30%	7349/1756/387/2113/7132/85358/441027/5311/4790/834/7832/56729/3356/9531/1535/4792/23621/2353/9750/6513/5027/9020/4055/25861/3553/3727/1265/2115/10631/22927/10628/958/285/9780/1956/59341/4323/2022/7098/355/7099/3371/623/3726/51284/7048/1634/3759/63895/3725/5270/1281/8061/2354/1277/4212/5743/6387/5764/7057/1301
GO:0045005	GO:0045005	DNA-dependent DNA replication maintenance of fidelity	41	0.673212	2.31532	5.06931e-08	6.82746e-07	3.71565e-07	3160	tags=61%	list=21%	signal=49%	641/4796/146956/5888/8914/253714/5111/1663/675/57697/5426/378708/5424/9984/10189/55159/1763/348654/54465/84083/29980/201254/54962/4361/4437
GO:0043044	GO:0043044	ATP-dependent chromatin remodeling	68	0.586498	2.22615	5.12743e-08	6.88272e-07	3.74572e-07	3683	tags=49%	list=24%	signal=37%	11339/55355/57082/1058/79682/79019/79172/64105/64946/54069/2491/387103/55839/91687/3066/55166/1107/86/378708/4678/8607/55320/57680/201254/54617/5928/81611/79913/6944/54107/6605/5931/3183
GO:0050671	GO:0050671	positive regulation of lymphocyte proliferation	100	-0.538999	-2.23455	5.30734e-08	7.10055e-07	3.86427e-07	2580	tags=47%	list=17%	signal=39%	5788/29126/3485/283234/975/916/1880/84868/1026/3071/683/80381/54440/3606/301/10673/8660/84433/1604/3553/920/941/604/3965/942/3115/199/10288/958/3133/596/23529/8744/3718/3109/64926/3113/3559/7099/80380/30835/972/7048/940/3479/4773/3569
GO:0000083	GO:0000083	regulation of transcription involved in G1/S transition of mitotic cell cycle	25	0.764466	2.35538	5.41038e-08	7.21443e-07	3.92625e-07	1036	tags=48%	list=7%	signal=45%	6241/8318/1869/144455/990/7298/4998/26271/1719/898/81620/5111
GO:0002791	GO:0002791	regulation of peptide secretion	380	-0.368291	-1.79125	5.79194e-08	7.69774e-07	4.18928e-07	2654	tags=30%	list=17%	signal=26%	2746/84818/3783/2852/6422/90007/29126/384/3098/7124/1113/7349/23568/64285/91543/5581/80024/8764/5467/933/27202/9734/84868/8864/7114/1992/8754/9501/114769/834/399687/57555/64175/64127/3790/23208/192683/9066/3586/6810/51738/5552/7128/91608/9572/301/284/26191/3709/6513/8660/5371/5027/2615/2621/7291/55107/1803/4067/28984/3553/2702/4155/6616/247/10631/9173/23601/114548/114899/10859/10411/3382/3965/103…
GO:0050868	GO:0050868	negative regulation of T cell activation	85	-0.562135	-2.2938	5.84647e-08	7.74466e-07	4.21481e-07	2884	tags=51%	list=19%	signal=41%	3659/51043/135/3620/10875/29126/384/9655/8764/84868/11314/1845/84807/3586/301/9750/26191/10457/55824/1840/2615/941/1051/10859/604/861/3965/942/4092/10288/3718/80149/2213/3559/79626/80380/972/64115/652/2737/3077/3566/11326
GO:0045839	GO:0045839	negative regulation of mitotic nuclear division	51	0.649066	2.32251	6.26257e-08	8.26865e-07	4.49998e-07	1292	tags=43%	list=8%	signal=40%	891/7272/991/9232/9212/701/699/1111/5347/10403/84101/9319/26271/4085/54908/1063/27085/81620/655/7517/10040/10459
GO:0019932	GO:0019932	second-messenger-mediated signaling	320	-0.384512	-1.83851	6.4126e-08	8.43906e-07	4.59272e-07	3003	tags=36%	list=20%	signal=29%	10645/7422/90550/1979/2280/2982/488/817/133/1234/4772/9368/2587/2983/135/5138/57190/2852/10266/5788/8698/9454/10267/10725/2771/481/7124/1113/7349/58529/1756/2015/916/10519/2902/976/2776/3269/107/5336/933/4882/695/2829/7462/113/115004/5141/196/5311/2274/2826/10203/9289/1902/683/57007/2977/2905/5592/4846/5997/196883/266977/9034/3709/6915/5027/6690/948/2494/1910/30817/920/1240/10231/8477/8877/2357/5…
GO:0034502	GO:0034502	protein localization to chromosome	78	0.567247	2.23515	6.45466e-08	8.46674e-07	4.60778e-07	4395	tags=54%	list=29%	signal=39%	7272/9212/57082/1058/983/113130/5347/10403/54908/4436/27085/157570/7015/2146/81620/55135/84515/84250/675/55166/22948/908/5885/79003/10694/7203/9184/55011/10856/6950/91272/9183/6117/6118/7013/51149/51535/10576/10574/10575/7520/25836
GO:0010712	GO:0010712	regulation of collagen metabolic process	38	-0.695513	-2.39752	6.80768e-08	8.87539e-07	4.83018e-07	1217	tags=45%	list=8%	signal=41%	28984/5159/7431/2022/407000/4261/64115/652/114757/7043/54206/90993/2191/1490/11117/4239/3569
GO:0002460	GO:0002460	adaptive immune response based on somatic recombination of immune receptors built from immunoglobulin superfamily domains	207	-0.435839	-1.99381	6.81027e-08	8.87539e-07	4.83018e-07	2609	tags=42%	list=17%	signal=35%	2067/5788/29126/182/23075/567/602/9655/7124/975/201294/200558/3426/91543/721/10538/1191/3134/84868/695/6774/64218/7454/3106/5452/10384/720/84807/11118/54440/3586/3105/3606/202309/5873/717/7128/301/3107/10673/5027/11035/1604/3553/64005/2207/9173/920/941/114548/10859/1512/604/10312/718/716/4092/958/8741/3133/715/23529/3635/3718/23180/6556/80149/3383/8809/7133/2213/3119/7099/714/713/972/3554/710/730…
GO:0030500	GO:0030500	regulation of bone mineralization	62	-0.615998	-2.34198	6.93955e-08	9.0147e-07	4.90599e-07	1601	tags=37%	list=10%	signal=33%	26585/91461/5552/56172/5027/7291/4054/1901/1230/144347/4256/652/359845/1893/1311/6348/7043/4921/338773/2824/3491/5764/5167
GO:0010812	GO:0010812	negative regulation of cell-substrate adhesion	58	-0.632012	-2.39017	7.41718e-08	9.60417e-07	5.22679e-07	2626	tags=50%	list=17%	signal=42%	23189/182/3956/574506/387/8324/81/4070/8322/10631/5295/604/10391/285/90102/4323/1029/2039/2192/23603/94/4035/10395/6695/1946/1277/5054/2633/7057
GO:0050731	GO:0050731	positive regulation of peptidyl-tyrosine phosphorylation	146	-0.486743	-2.14935	7.8626e-08	1.01483e-06	5.52292e-07	1667	tags=33%	list=11%	signal=30%	3356/3606/3589/26585/83666/3059/51738/284/50507/8829/2621/948/5175/4067/54625/920/941/6886/3082/4739/5168/958/23529/9021/7039/3690/3383/960/57091/84632/1839/1636/972/5155/1436/1464/1946/4038/407006/3678/54209/3479/5008/1272/2209/2252/3976/3569
GO:0055065	GO:0055065	metal ion homeostasis	473	-0.346491	-1.70861	7.94514e-08	1.02221e-06	5.56307e-07	3103	tags=34%	list=20%	signal=28%	22821/5310/29887/2946/23627/6263/6786/9997/6332/3777/90550/538/151176/3091/1312/2280/488/9114/817/133/2053/1234/2587/135/113235/25/7052/11346/57190/1909/64072/2852/5788/8698/7922/23075/567/2771/481/8301/2859/261729/728/1756/2902/5581/51312/1903/10699/80024/5336/9481/27202/23516/2829/286530/8996/10367/23479/5311/30061/2826/1318/91252/1902/7442/56898/57007/2905/3356/64116/825/1535/3685/84959/51738/…
GO:0017015	GO:0017015	regulation of transforming growth factor beta receptor signaling pathway	100	-0.535933	-2.22184	7.98694e-08	1.02431e-06	5.57453e-07	2135	tags=35%	list=14%	signal=30%	7041/8516/51341/858/6497/8425/57154/6386/65997/94031/1028/114990/10370/6498/6935/4092/857/2200/2022/406890/54829/27122/50515/83891/1601/7048/255743/7043/375387/1030/11117/7046/5654/4015/7057
GO:0048545	GO:0048545	response to steroid hormone	314	-0.386905	-1.84738	1.00911e-07	1.29006e-06	7.02076e-07	2135	tags=25%	list=14%	signal=22%	7041/5467/1026/8754/51341/11057/9612/2274/7025/8611/3557/5916/4129/6382/3586/760/1535/5724/678/2353/9572/301/1408/6781/2494/687/3176/54541/6696/445/9420/677/861/3164/199/10628/3490/2099/596/7097/2308/857/1956/3291/3383/2022/5069/8013/25959/1536/1843/8204/6678/652/1601/6586/7048/7421/7043/54206/6943/590/1490/8061/2354/1277/266743/7538/7068/9353/4306/387758/5743/5764/4015/7057/3569
GO:0048661	GO:0048661	positive regulation of smooth muscle cell proliferation	82	-0.571446	-2.31061	1.04449e-07	1.33106e-06	7.24393e-07	1820	tags=37%	list=12%	signal=32%	10203/3586/3606/1535/5724/4318/2247/1901/10257/5159/199/10135/4854/1956/8013/1012/1839/652/7048/5155/9510/80310/3725/407006/8840/3479/5743/7057/4313/3569
GO:0032964	GO:0032964	collagen biosynthetic process	41	-0.6831	-2.39709	1.06671e-07	1.35509e-06	7.37469e-07	1217	tags=46%	list=8%	signal=43%	9697/28984/5159/7431/2022/407000/871/4261/652/57333/114757/7043/54206/90993/1490/1289/1277/11117/3569
GO:0070125	GO:0070125	mitochondrial translational elongation	88	0.545801	2.20294	1.0882e-07	1.37805e-06	7.49962e-07	4794	tags=72%	list=31%	signal=49%	54148/64968/92259/29093/51318/28998/64965/65008/54534/51258/57129/64983/3396/51373/23107/64960/28977/55168/56945/55173/64978/10884/60488/219927/740/10573/79590/64951/65080/64979/51116/51253/11222/26589/6150/65005/51264/51649/54460/55037/51023/90480/122704/9553/51642/28957/84311/51069/51263/5018/85476/7284/51081/54948/65993/28973/64976/6183/9801/29088/64928/54998/10102
GO:0071396	GO:0071396	cellular response to lipid	484	-0.344052	-1.70283	1.09895e-07	1.38729e-06	7.54995e-07	2434	tags=26%	list=16%	signal=23%	133522/353376/7124/22904/5187/57658/387/3654/3949/5581/153090/824/8324/107/10221/2920/1191/5142/7041/5467/11344/84868/8754/51341/196/11057/4478/9612/114769/4790/834/9314/2274/7025/8611/3557/64127/1902/5916/968/558/259230/3586/3606/4846/5724/129607/4792/678/7128/56603/9572/301/26191/3656/8322/8854/5979/1408/6781/6915/948/2494/1910/687/5292/4067/54541/1604/3553/6696/941/27/23643/114548/445/1051/108…
GO:0060541	GO:0060541	respiratory system development	166	-0.457732	-2.04532	1.13672e-07	1.43049e-06	7.78505e-07	1642	tags=26%	list=11%	signal=23%	4846/3988/6722/91461/8854/23210/4054/2246/10272/5159/445/1512/1522/1956/64759/4323/94235/1896/3371/9242/10252/6678/9509/5156/2034/652/7048/57333/2737/7043/54206/6943/57493/10365/10630/1490/7068/220/83716/5764/4015/2252/3976
GO:0050729	GO:0050729	positive regulation of inflammatory response	105	-0.5237	-2.18237	1.18117e-07	1.4818e-06	8.06426e-07	2866	tags=47%	list=19%	signal=38%	90865/148022/3620/5138/7052/84818/4615/7124/975/8717/2113/3949/7132/2896/695/64127/406913/3606/4792/283131/3553/2207/9173/1051/718/6279/3133/7097/1956/64581/59341/8792/26471/5733/7098/7099/51284/9180/6348/940/6349/6280/54209/8840/64332/5054/5008/5743/3569
GO:1903409	GO:1903409	reactive oxygen species biosynthetic process	94	-0.541176	-2.23205	1.18603e-07	1.48327e-06	8.07226e-07	2519	tags=41%	list=16%	signal=35%	384/7124/387/8729/2902/53905/1191/6774/5311/9314/4129/7442/3586/5873/4846/1535/50507/948/50506/3553/445/3643/6542/199/857/64581/80149/3383/90527/1545/947/7099/3689/1536/140885/10365/5740/406994/5743
GO:0097530	GO:0097530	granulocyte migration	91	-0.54432	-2.22135	1.33513e-07	1.66457e-06	9.05896e-07	2423	tags=49%	list=16%	signal=42%	728/56833/8729/3269/83700/2920/9948/5142/27202/4267/3071/7409/11314/3557/683/301/5293/9750/5175/30817/3553/120425/4354/2207/1240/6347/6279/1441/1435/2921/7857/59341/719/3689/6351/3680/8291/972/3554/6348/6349/6280/5919/9353/7057
GO:0051784	GO:0051784	negative regulation of nuclear division	55	0.61317	2.21818	1.34019e-07	1.66551e-06	9.06409e-07	1355	tags=44%	list=9%	signal=40%	891/7272/991/9232/9212/701/699/1111/84072/5347/10403/84101/9319/26271/4085/54908/1063/27085/81620/655/7517/10040/10459/5810
GO:0006024	GO:0006024	glycosaminoglycan biosynthetic process	94	-0.539811	-2.22642	1.34416e-07	1.66551e-06	9.06409e-07	2593	tags=49%	list=17%	signal=41%	55454/11046/3340/6484/2817/8509/54480/113189/29940/56548/6482/4790/9957/3037/7358/2683/9469/9435/6382/3038/284/51363/3553/22856/5159/79586/2239/3339/176/64131/5549/1462/633/9955/6383/50515/5155/2331/1634/1464/2134/4060/11227/10082/10090/57214
GO:0007062	GO:0007062	sister chromatid cohesion	51	0.638758	2.28563	1.39236e-07	1.71995e-06	9.36035e-07	3447	tags=51%	list=23%	signal=40%	991/701/9700/699/113130/84072/5347/151648/2237/79075/3835/157570/151246/84250/1663/8313/5885/9985/5889/114799/6421/4361/10734/9126/23047/91272
GO:0033002	GO:0033002	muscle cell proliferation	179	-0.446603	-2.01029	1.40874e-07	1.73487e-06	9.44151e-07	2418	tags=33%	list=16%	signal=28%	7124/574506/2260/3654/406919/10221/3611/5467/4209/1026/6774/9314/10203/3586/3606/5592/1535/5724/7128/284/26011/4318/5292/7168/2247/1901/10257/5159/3486/199/10135/693223/4854/6909/5136/1956/5739/8013/1012/1839/652/7048/5155/9510/7043/80310/3725/2006/7046/407006/8862/8840/6934/3479/5743/1264/7057/4313/3569
GO:0007131	GO:0007131	reciprocal meiotic recombination	41	0.662966	2.28008	1.51173e-07	1.85602e-06	1.01009e-06	3174	tags=61%	list=21%	signal=48%	7153/8438/9319/146956/84057/83990/29893/5888/644186/80010/57697/378708/25788/5885/4439/285498/9985/201254/5889/79703/7155/11105/4361/4437/84464
GO:0045787	GO:0045787	positive regulation of cell cycle	329	0.36706	1.77608	1.52436e-07	1.86583e-06	1.01543e-06	2835	tags=30%	list=19%	signal=25%	891/11065/9787/51203/995/9212/8318/1869/983/9928/6790/9700/144455/2810/113130/990/1164/1111/51512/51514/29127/10403/10615/79733/10733/9585/993/8091/26271/81610/4085/11113/2237/1894/79915/9493/25886/1163/7480/8317/3642/1906/27085/10926/7015/2146/2735/29899/898/81620/7517/23236/84250/5111/5629/54627/1663/6665/675/9475/595/79447/201161/79848/8851/219736/11200/55512/85459/9984/3306/245711/284071/1378…
GO:2001057	GO:2001057	reactive nitrogen species metabolic process	67	-0.585919	-2.26942	1.66434e-07	2.03099e-06	1.10531e-06	2155	tags=40%	list=14%	signal=35%	1191/5311/9314/7442/3586/4846/948/3553/445/3643/113277/6542/199/7097/857/64581/80149/3383/1545/947/7099/3689/140885/10365/5740/406994/5743
GO:1901343	GO:1901343	negative regulation of vasculature development	109	-0.517197	-2.17375	1.75021e-07	2.12933e-06	1.15883e-06	2050	tags=37%	list=13%	signal=32%	64218/64855/22846/5797/9314/161742/7010/1284/3087/10769/4804/51738/56999/1969/6915/5371/28984/7075/641700/3339/2828/4303/79812/285/6678/23213/652/5155/1634/90993/10365/11117/407006/23166/5054/406994/4773/7058/5764/7057
GO:0007094	GO:0007094	mitotic spindle assembly checkpoint	34	0.693058	2.27373	1.86076e-07	2.2368e-06	1.21732e-06	891	tags=44%	list=6%	signal=42%	891/7272/991/9212/701/699/5347/10403/84101/9319/4085/54908/1063/81620/7517
GO:0031577	GO:0031577	spindle checkpoint	34	0.693058	2.27373	1.86076e-07	2.2368e-06	1.21732e-06	891	tags=44%	list=6%	signal=42%	891/7272/991/9212/701/699/5347/10403/84101/9319/4085/54908/1063/81620/7517
GO:0071173	GO:0071173	spindle assembly checkpoint	34	0.693058	2.27373	1.86076e-07	2.2368e-06	1.21732e-06	891	tags=44%	list=6%	signal=42%	891/7272/991/9212/701/699/5347/10403/84101/9319/4085/54908/1063/81620/7517
GO:0071174	GO:0071174	mitotic spindle checkpoint	34	0.693058	2.27373	1.86076e-07	2.2368e-06	1.21732e-06	891	tags=44%	list=6%	signal=42%	891/7272/991/9212/701/699/5347/10403/84101/9319/4085/54908/1063/81620/7517
GO:0002548	GO:0002548	monocyte chemotaxis	40	-0.683033	-2.3862	2.01613e-07	2.41318e-06	1.3133e-06	1643	tags=48%	list=11%	signal=43%	5641/26585/301/4067/2321/6347/199/1230/8792/6351/1843/5155/6348/6349/4681/9353/5054/6387/3569
GO:1903844	GO:1903844	regulation of cellular response to transforming growth factor beta stimulus	102	-0.517693	-2.15702	2.01947e-07	2.41318e-06	1.3133e-06	2135	tags=34%	list=14%	signal=30%	7041/8516/51341/858/6497/8425/57154/6386/65997/94031/1028/114990/10370/6498/6935/4092/857/2200/2022/406890/54829/27122/50515/83891/1601/7048/255743/7043/375387/1030/11117/7046/5654/4015/7057
GO:0048008	GO:0048008	platelet-derived growth factor receptor signaling pathway	55	-0.617579	-2.32169	2.02698e-07	2.41499e-06	1.31429e-06	1456	tags=33%	list=10%	signal=30%	8829/5159/84159/9564/10628/693223/5739/5327/8013/5156/64651/5155/4035/5157/80310/407006/2152/4015
GO:0002429	GO:0002429	immune response-activating cell surface receptor signaling pathway	311	-0.384281	-1.83478	2.08161e-07	2.46548e-06	1.34177e-06	2851	tags=31%	list=19%	signal=26%	7456/5698/1540/25/10603/3385/5970/200958/3783/123920/5788/59338/5583/10109/1793/728/5696/975/11119/916/5581/5336/1997/974/5142/933/27202/695/7462/55198/3117/919/9473/4790/10095/3071/7454/7409/4340/3384/11314/10384/1845/10458/5063/84807/80381/11118/11006/9402/5293/64170/26191/3120/55824/84433/2359/4067/5699/64005/2207/5295/920/1240/2357/9564/861/3055/2533/5359/3115/3937/596/3635/23180/80149/3113/2…
GO:0002757	GO:0002757	immune response-activating signal transduction	311	-0.384281	-1.83478	2.08161e-07	2.46548e-06	1.34177e-06	2851	tags=31%	list=19%	signal=26%	7456/5698/1540/25/10603/3385/5970/200958/3783/123920/5788/59338/5583/10109/1793/728/5696/975/11119/916/5581/5336/1997/974/5142/933/27202/695/7462/55198/3117/919/9473/4790/10095/3071/7454/7409/4340/3384/11314/10384/1845/10458/5063/84807/80381/11118/11006/9402/5293/64170/26191/3120/55824/84433/2359/4067/5699/64005/2207/5295/920/1240/2357/9564/861/3055/2533/5359/3115/3937/596/3635/23180/80149/3113/2…
GO:0051896	GO:0051896	regulation of protein kinase B signaling	183	-0.439918	-1.98267	2.08994e-07	2.4681e-06	1.34319e-06	2677	tags=34%	list=17%	signal=29%	8817/9518/22876/2852/4534/59338/5526/7124/2260/10519/391/3611/2876/3688/9314/7409/2159/9863/7010/558/406913/3606/3059/9037/5293/284/50507/1969/5979/8660/2621/23533/2246/2247/118788/5159/5295/941/3082/10019/3643/942/114897/2099/10268/7039/1956/2022/1839/5156/112464/5155/57333/6348/940/7046/407006/3480/6934/5008/2152/7057/2252
GO:0006338	GO:0006338	chromatin remodeling	170	0.443701	1.98956	2.10074e-07	2.4736e-06	1.34618e-06	4440	tags=42%	list=29%	signal=30%	11339/55355/57082/1058/79682/79019/79172/64105/64946/8091/3149/54069/11164/2491/3070/387103/3148/55839/23314/57673/91687/3066/79723/55166/11335/2625/1107/201161/86/6662/3720/378708/4678/8607/79829/55320/57680/23347/10155/201254/54617/6871/5928/55011/5058/10856/1786/3146/3159/11177/81611/79913/6944/4602/6839/54107/80312/6605/5931/3183/55636/8626/125476/9869/51535/1108/283899/6597/57343/9557/7175/5…
GO:0006936	GO:0006936	muscle contraction	276	-0.392892	-1.86321	2.12241e-07	2.49182e-06	1.3561e-06	1823	tags=25%	list=12%	signal=23%	23336/10203/7442/4660/7414/3356/5592/2316/5997/5724/6722/92241/51738/7094/5606/5829/7871/8913/3784/6781/6915/29767/10174/1910/7168/2702/72/8877/7171/4092/4634/10398/3693/7431/10848/800/857/4608/80149/3778/6261/5733/6525/4629/10052/2775/147/8291/4638/23213/1145/3759/10008/55959/1311/59/255743/10580/4621/1490/6444/8082/26509/287/5350/5743/5348/25802/1264/126393
GO:1901652	GO:1901652	response to peptide	429	-0.345898	-1.69355	2.26915e-07	2.64643e-06	1.44024e-06	2054	tags=22%	list=13%	signal=20%	6774/55198/113/858/4790/9314/9882/8743/2650/1154/7832/64127/10458/56729/7010/7442/6464/28999/3663/3586/760/5641/1535/196883/3087/4792/4804/51738/23621/7128/301/64170/26191/5829/6513/8660/23433/948/1910/4318/4067/3553/3727/9340/5295/445/6777/677/9564/3643/10312/3164/4303/837/22861/5791/10268/10135/9021/7431/7097/55022/2308/3718/857/3291/59341/2200/1958/3383/2213/6776/8013/308/7099/1536/8614/11031/…
GO:0014812	GO:0014812	muscle cell migration	83	-0.553224	-2.24862	2.27178e-07	2.64643e-06	1.44024e-06	2210	tags=42%	list=14%	signal=36%	10221/3611/5467/9732/3037/1902/5592/301/50507/8829/7168/10631/5159/3486/4303/199/55742/596/693223/3690/5327/407000/8013/1636/5155/9510/4035/5328/80310/6608/407006/8840/9353/5054/3479
GO:0002690	GO:0002690	positive regulation of leukocyte chemotaxis	66	-0.589844	-2.27223	2.27381e-07	2.64643e-06	1.44024e-06	1643	tags=35%	list=11%	signal=31%	5641/9750/2621/1240/3965/199/1435/59341/1230/719/6351/5228/7424/8291/972/6348/9547/5919/5054/6387/5764/7057/3569
GO:0045841	GO:0045841	negative regulation of mitotic metaphase/anaphase transition	36	0.688432	2.3034	2.29516e-07	2.65592e-06	1.44541e-06	891	tags=44%	list=6%	signal=42%	891/7272/991/9212/701/699/5347/10403/84101/9319/26271/4085/54908/1063/81620/7517
GO:1902100	GO:1902100	negative regulation of metaphase/anaphase transition of cell cycle	36	0.688432	2.3034	2.29516e-07	2.65592e-06	1.44541e-06	891	tags=44%	list=6%	signal=42%	891/7272/991/9212/701/699/5347/10403/84101/9319/26271/4085/54908/1063/81620/7517
GO:0032886	GO:0032886	regulation of microtubule-based process	202	0.414818	1.88382	2.31046e-07	2.66597e-06	1.45088e-06	2604	tags=30%	list=17%	signal=25%	81930/221150/22974/6790/1111/3832/5347/6491/3925/10615/10733/4233/79929/25886/899/220134/64793/4751/56683/79187/25893/29899/55521/26586/7517/10460/80128/8045/79866/54627/401236/9475/92749/55036/50861/8851/55130/8480/254263/85459/137886/2258/4133/157922/2288/5902/2770/7514/4137/348654/27124/348235/672/79598/1027/255758/55835/84722/4591/79959/126731
GO:0043536	GO:0043536	positive regulation of blood vessel endothelial cell migration	54	-0.626328	-2.34382	2.4168e-07	2.7807e-06	1.51331e-06	3173	tags=65%	list=21%	signal=52%	3162/7040/406888/7422/3091/51378/25/8817/4215/2113/2260/10519/3315/9734/7114/51564/406913/4846/10769/301/284/57608/5587/5606/8829/2247/958/57381/6776/7424/27286/5155/407006/5743/7057
GO:0060349	GO:0060349	bone morphogenesis	87	-0.550602	-2.23909	2.48527e-07	2.85133e-06	1.55176e-06	1938	tags=39%	list=13%	signal=34%	3037/6497/5916/1293/7010/56603/6781/7291/4054/22856/4487/302/51435/59341/4323/1291/871/64856/1292/85301/652/7048/2737/1311/7043/1277/7373/338773/9249/860/6424/4148/1303/6423
GO:0070374	GO:0070374	positive regulation of ERK1 and ERK2 cascade	154	-0.454376	-2.01906	2.51441e-07	2.87658e-06	1.56549e-06	1821	tags=31%	list=12%	signal=27%	64127/9464/7010/6464/57007/406913/3356/284/26191/10457/50507/8829/2621/948/2247/5159/920/2321/3965/6347/152007/10268/1956/59341/1230/3383/8792/960/5322/7099/6351/8482/972/5156/652/112464/5155/1436/4035/6348/255743/80310/3725/6349/1490/407006/54209
GO:0002042	GO:0002042	cell migration involved in sprouting angiogenesis	58	-0.615544	-2.32789	2.57817e-07	2.94116e-06	1.60064e-06	3173	tags=60%	list=21%	signal=48%	3162/406888/7422/54567/1948/25/4215/574506/387/10519/9734/51564/3688/9314/161742/406913/26585/6722/10769/301/57608/8829/6915/2247/161198/6091/3164/79812/57381/1960/27286/407006/9353/5743/7057
GO:0010595	GO:0010595	positive regulation of endothelial cell migration	96	-0.528705	-2.1902	2.63762e-07	3.00048e-06	1.63293e-06	3173	tags=55%	list=21%	signal=44%	3162/7040/406888/2324/7422/3091/51378/25/8817/4215/2113/2260/10519/3315/8828/2896/9734/7114/51564/7010/406913/64094/5641/4846/10769/9037/301/284/57608/5587/5606/8829/2246/388/2247/8613/9564/23328/958/57381/3690/80149/6776/84913/25960/7424/27286/6678/652/5155/407006/5743/7057
GO:0045778	GO:0045778	positive regulation of ossification	75	-0.569883	-2.25731	2.65902e-07	3.0163e-06	1.64154e-06	1685	tags=32%	list=11%	signal=29%	9260/91461/5587/5027/3727/23051/3082/1051/115908/1052/652/2737/255743/7043/4921/338773/2824/8840/3479/3491/860/5764/3569/6423
GO:0070167	GO:0070167	regulation of biomineral tissue development	75	-0.569027	-2.25392	2.84399e-07	3.20805e-06	1.74589e-06	1642	tags=36%	list=11%	signal=32%	4846/26585/91461/5552/56172/5027/2621/7291/4054/1901/1051/1230/54829/144347/4256/652/359845/1893/1311/6348/7043/4921/338773/2824/3491/5764/5167
GO:0110149	GO:0110149	regulation of biomineralization	75	-0.569027	-2.25392	2.84399e-07	3.20805e-06	1.74589e-06	1642	tags=36%	list=11%	signal=32%	4846/26585/91461/5552/56172/5027/2621/7291/4054/1901/1051/1230/54829/144347/4256/652/359845/1893/1311/6348/7043/4921/338773/2824/3491/5764/5167
GO:0044706	GO:0044706	multi-multicellular organism process	163	-0.459557	-2.05217	3.11148e-07	3.49998e-06	1.90476e-06	2236	tags=34%	list=15%	signal=30%	10699/824/5467/10916/8528/84868/113/2683/81671/2182/2057/5997/5724/51738/2353/397/8434/6513/6781/412/7005/1508/8605/4318/3553/6696/5744/3965/3490/285/2099/596/10135/3291/5069/2192/5228/8614/85360/3726/7056/23764/7048/7421/7043/3077/5270/8061/2354/3678/5740/5743/1307/5764/4313/3976
GO:0032200	GO:0032200	telomere organization	146	0.450907	1.96111	3.18771e-07	3.57574e-06	1.94599e-06	3761	tags=42%	list=25%	signal=32%	641/9156/9212/9134/5588/5570/9401/2237/5983/80119/5888/4751/5984/7015/5427/898/55135/7517/5985/5557/5111/6119/675/5426/9937/23649/22948/5424/908/5982/5591/5425/64858/1763/55651/5558/10694/7203/142/5889/10714/548593/3364/5422/24144/7515/55183/167227/79008/4361/84464/6950/7874/54107/9887/6117/4683/6118/55226/3183/220064
GO:0046209	GO:0046209	nitric oxide metabolic process	66	-0.586305	-2.2586	3.25766e-07	3.64405e-06	1.98317e-06	2155	tags=41%	list=14%	signal=35%	1191/5311/9314/7442/3586/4846/948/3553/445/3643/113277/6542/199/7097/857/64581/80149/3383/1545/947/7099/3689/140885/10365/5740/406994/5743
GO:0006023	GO:0006023	aminoglycan biosynthetic process	97	-0.530619	-2.20222	3.4161e-07	3.81044e-06	2.07372e-06	2593	tags=48%	list=17%	signal=40%	55454/11046/3340/6484/2817/8509/54480/113189/29940/56548/6482/4790/9957/3037/7358/2683/9469/9435/6382/3038/284/51363/3553/22856/5159/79586/2239/3339/176/64131/5549/1462/633/9955/6383/84752/50515/5155/2331/1634/1464/2134/4060/11227/10082/10090/57214
GO:0032835	GO:0032835	glomerulus development	52	-0.627591	-2.32576	3.42533e-07	3.81044e-06	2.07372e-06	1841	tags=48%	list=12%	signal=42%	9863/7010/28999/9788/284/5979/2028/5420/5175/5159/2828/285/596/4854/1958/947/4811/5156/23213/652/5155/55959/59/80310/6943
GO:0030324	GO:0030324	lung development	144	-0.468955	-2.05628	3.49579e-07	3.87811e-06	2.11055e-06	1642	tags=26%	list=11%	signal=24%	4846/3988/6722/91461/8854/23210/4054/2246/10272/5159/1512/1522/1956/64759/4323/3371/10252/6678/9509/5156/2034/652/7048/57333/2737/7043/54206/6943/57493/10365/10630/1490/7068/83716/5764/4015/2252/3976
GO:0003013	GO:0003013	circulatory system process	422	-0.35006	-1.71184	3.63724e-07	4.02395e-06	2.18992e-06	3245	tags=37%	list=21%	signal=30%	5566/83943/59342/3750/2642/4205/11214/3162/7040/6648/3764/6714/2946/6263/6786/80005/3212/7422/54567/3777/29/2982/488/817/1889/30818/133/2053/10242/2983/135/5138/5465/1727/93589/64167/1909/2852/10266/7423/84909/2771/481/1113/60598/7349/1756/387/89797/6324/10699/3269/2548/143872/5142/5467/8985/4882/8864/2876/4973/9732/5973/3762/5797/1359/7010/7442/3356/5592/4846/2316/1535/5997/5724/51738/91608/284/…
GO:0001774	GO:0001774	microglial cell activation	38	-0.676594	-2.3323	3.65948e-07	4.02642e-06	2.19127e-06	2580	tags=61%	list=17%	signal=50%	5788/728/7124/3949/2896/1191/7442/9572/3684/8877/199/8530/10135/7097/7305/7098/3689/51284/6348/712/3725/54209/3569
GO:0002269	GO:0002269	leukocyte activation involved in inflammatory response	38	-0.676594	-2.3323	3.65948e-07	4.02642e-06	2.19127e-06	2580	tags=61%	list=17%	signal=50%	5788/728/7124/3949/2896/1191/7442/9572/3684/8877/199/8530/10135/7097/7305/7098/3689/51284/6348/712/3725/54209/3569
GO:0002063	GO:0002063	chondrocyte development	41	-0.667815	-2.34345	3.74609e-07	4.09862e-06	2.23056e-06	1136	tags=56%	list=7%	signal=52%	22856/5744/176/51435/1291/871/144347/64856/1292/85301/50515/23213/359845/7048/1893/55959/1311/7373/860/4148/1303/1301/6423
GO:0050707	GO:0050707	regulation of cytokine secretion	151	-0.462086	-2.04824	3.75511e-07	4.09862e-06	2.23056e-06	2192	tags=37%	list=14%	signal=32%	8764/27202/9734/84868/7114/1992/114769/834/64127/23208/192683/3586/51738/5552/7128/301/284/26191/5371/5027/2615/2621/7291/4067/28984/3553/4155/247/10631/9173/23601/114548/114899/10859/3965/131450/199/22861/7097/59341/80149/7133/2335/2213/947/7099/7096/1436/4035/6348/929/3566/8840/5008/2633/284297
GO:0000723	GO:0000723	telomere maintenance	145	0.453388	1.97538	3.75563e-07	4.09862e-06	2.23056e-06	3761	tags=42%	list=25%	signal=32%	641/9156/9212/9134/5588/5570/9401/2237/5983/80119/5888/4751/5984/7015/5427/898/55135/7517/5985/5557/5111/6119/675/5426/9937/23649/22948/5424/908/5982/5591/5425/64858/1763/55651/5558/10694/7203/142/5889/10714/548593/3364/5422/24144/7515/55183/167227/79008/4361/84464/6950/7874/54107/9887/6117/4683/6118/55226/3183/220064
GO:0016525	GO:0016525	negative regulation of angiogenesis	96	-0.52332	-2.16789	3.88136e-07	4.22439e-06	2.299e-06	2050	tags=39%	list=13%	signal=34%	64218/64855/22846/5797/9314/161742/7010/1284/3087/10769/4804/51738/56999/1969/6915/5371/28984/7075/641700/3339/2828/4303/79812/285/6678/23213/1634/90993/10365/11117/407006/23166/5054/406994/7058/5764/7057
GO:1901989	GO:1901989	positive regulation of cell cycle phase transition	88	0.533175	2.15198	4.05574e-07	4.40228e-06	2.39581e-06	1411	tags=30%	list=9%	signal=27%	891/11065/9787/995/8318/983/9700/113130/990/51514/993/26271/81610/79915/7480/8317/27085/7015/2146/2735/898/81620/23236/595/79447/219736
GO:0035825	GO:0035825	homologous recombination	42	0.653107	2.25752	4.07933e-07	4.41599e-06	2.40327e-06	3174	tags=60%	list=21%	signal=47%	7153/8438/9319/146956/84057/83990/29893/5888/644186/80010/57697/378708/25788/5885/4439/285498/9985/201254/5889/79703/7155/11105/4361/4437/84464
GO:0051897	GO:0051897	positive regulation of protein kinase B signaling	139	-0.469089	-2.04456	4.14214e-07	4.47196e-06	2.43374e-06	1937	tags=34%	list=13%	signal=30%	391/3611/2876/3688/7409/2159/7010/558/406913/3606/3059/9037/5293/284/50507/5979/8660/2621/23533/2246/2247/118788/5159/5295/941/3082/3643/942/114897/2099/10268/7039/1956/2022/1839/5156/5155/6348/940/7046/407006/3480/6934/5008/2152/7057/2252
GO:0002221	GO:0002221	pattern recognition receptor signaling pathway	161	-0.452257	-2.00801	4.23783e-07	4.56303e-06	2.4833e-06	2884	tags=37%	list=19%	signal=30%	3659/55601/148022/1540/81622/5970/4615/3303/7316/80216/353376/6397/79132/91543/3654/9261/5581/153090/23151/23098/84868/695/55198/11314/64127/5641/1535/4792/1514/7128/9572/26191/3656/1520/3684/1508/948/4067/146722/118788/23643/81035/6279/2099/7097/857/64581/23180/338382/7098/11213/7099/3689/7096/51284/1513/929/6280/9865
GO:0002367	GO:0002367	cytokine production involved in immune response	85	-0.538886	-2.19893	4.47602e-07	4.80665e-06	2.61588e-06	2695	tags=51%	list=18%	signal=42%	10225/3140/567/3098/7124/1113/975/91543/8764/3134/695/64127/54440/3586/3606/284/2621/948/1604/3553/2207/114548/10859/604/4092/3133/7097/3718/6556/8809/7133/7098/8013/11213/7099/684/8482/972/3554/7043/3077/9865/3569
GO:1902903	GO:1902903	regulation of supramolecular fiber organization	312	-0.376475	-1.80042	4.52677e-07	4.84822e-06	2.63851e-06	2570	tags=29%	list=17%	signal=25%	6422/389/10109/23075/7408/3303/51466/387/3949/10519/89795/5581/85358/832/9948/1191/11344/80206/2876/7114/9647/10095/3071/7454/55243/79709/4130/1902/116985/10458/5063/51332/9886/9535/10435/55616/2316/3059/9037/50944/4070/50507/8829/150356/5829/29767/10174/22998/91663/7984/28984/7168/1901/171024/57731/5295/22924/8477/148170/89927/29109/10411/10391/3055/2059/90102/10602/51474/59341/3383/5341/22899/2…
GO:0050708	GO:0050708	regulation of protein secretion	361	-0.357521	-1.72839	4.60222e-07	4.91595e-06	2.67536e-06	2713	tags=30%	list=18%	signal=26%	406/8609/2746/84818/3783/2852/6422/90007/29126/384/3098/7124/1113/23568/64285/91543/5581/80024/8764/5467/933/27202/9734/84868/8864/7114/1992/8754/9501/114769/834/399687/57555/64175/64127/3790/23208/192683/9066/3586/6810/51738/5552/7128/9572/301/284/26191/3709/6513/8660/5371/5027/2615/2621/7291/55107/1803/4067/28984/3553/2702/4155/6616/247/10631/9173/23601/114548/114899/10859/10411/3382/3965/10312…
GO:0007044	GO:0007044	cell-substrate junction assembly	92	-0.526138	-2.15239	4.90108e-07	5.20495e-06	2.83264e-06	1779	tags=38%	list=12%	signal=34%	8874/6422/387/23499/3914/9647/1845/7010/79834/5339/7094/8829/3987/22998/10391/596/90102/10979/4323/7145/2335/2039/7070/23603/94/29984/4035/10395/87/1946/10580/2824/3678/1307/7057
GO:0150115	GO:0150115	cell-substrate junction organization	92	-0.526138	-2.15239	4.90108e-07	5.20495e-06	2.83264e-06	1779	tags=38%	list=12%	signal=34%	8874/6422/387/23499/3914/9647/1845/7010/79834/5339/7094/8829/3987/22998/10391/596/90102/10979/4323/7145/2335/2039/7070/23603/94/29984/4035/10395/87/1946/10580/2824/3678/1307/7057
GO:0007266	GO:0007266	Rho protein signal transduction	185	-0.425097	-1.92275	4.9116e-07	5.20495e-06	2.83264e-06	2218	tags=34%	list=14%	signal=29%	391/143872/57449/89846/286530/3688/7454/7409/83892/9411/9289/30851/1902/9886/10435/128272/389337/4804/2245/392/397/9750/8829/23433/54922/5175/9828/221472/7984/388/22836/9002/10161/5159/390/27/8477/58480/148170/604/2828/6091/79567/2059/152273/115557/57381/10602/80243/9459/22899/157285/1012/25959/55160/11135/29984/10395/50649/57493/1281/10630/1278
GO:2001237	GO:2001237	negative regulation of extrinsic apoptotic signaling pathway	88	-0.535317	-2.18263	4.92447e-07	5.20495e-06	2.83264e-06	2502	tags=38%	list=16%	signal=32%	3303/8682/7124/8717/2876/8996/8743/57630/4846/3685/2537/7128/8829/4170/3553/3082/596/4000/7857/3383/23017/219699/355/652/2070/85450/7046/407006/5054/6934/3479/7057/6423
GO:0045619	GO:0045619	regulation of lymphocyte differentiation	138	-0.467779	-2.03645	5.30846e-07	5.59612e-06	3.04553e-06	1927	tags=34%	list=13%	signal=30%	3071/9308/57630/286410/558/84807/54440/3606/11006/3707/678/56603/301/1840/2621/9580/11221/84433/941/114548/677/604/861/3965/942/6935/4092/10288/8744/3635/3718/3111/80149/4323/3559/1960/972/64115/652/7048/2737/3566/940/3624/1378/64332/4773
GO:0008015	GO:0008015	blood circulation	411	-0.346735	-1.69341	5.70257e-07	5.99589e-06	3.26309e-06	3245	tags=36%	list=21%	signal=30%	5566/83943/59342/3750/2642/4205/3162/7040/6648/3764/6714/2946/6263/6786/80005/3212/7422/54567/3777/29/2982/488/817/1889/30818/133/2053/10242/2983/135/5138/5465/1727/93589/64167/1909/2852/10266/7423/84909/481/1113/60598/7349/1756/387/89797/6324/10699/3269/2548/143872/5142/5467/8985/4882/8864/2876/4973/9732/5973/3762/5797/1359/7010/7442/3356/5592/4846/2316/1535/5997/5724/51738/91608/284/5606/3709/2…
GO:2000379	GO:2000379	positive regulation of reactive oxygen species metabolic process	82	-0.551662	-2.23061	5.72998e-07	6.00597e-06	3.26858e-06	2484	tags=41%	list=16%	signal=35%	2771/7124/2902/1191/1026/5311/9314/7442/5873/1535/50507/3684/948/11035/3553/5159/445/3643/113277/199/55022/1956/64581/80149/7305/3383/90527/7099/3689/7048/5155/10365/5743/7057
GO:0090329	GO:0090329	regulation of DNA-dependent DNA replication	53	0.602732	2.16856	5.74199e-07	6.00597e-06	3.26858e-06	4027	tags=64%	list=26%	signal=47%	641/144455/79733/26271/90381/51053/5983/79075/8317/8914/10926/5984/81620/63922/2956/5985/675/11200/5982/58525/84083/1017/29980/80174/54962/54617/57418/4361/4437/9126/4683/56897/30968/7013
GO:0007565	GO:0007565	female pregnancy	145	-0.460772	-2.0265	6.07286e-07	6.3356e-06	3.44797e-06	2236	tags=34%	list=15%	signal=30%	10699/824/5467/10916/84868/113/81671/2182/2057/5997/51738/2353/397/8434/6513/6781/412/7005/1508/4318/3553/6696/5744/3965/3490/285/2099/596/10135/3291/5069/2192/5228/8614/85360/3726/7056/7048/7421/7043/3077/8061/2354/3678/5740/5743/1307/5764/4313/3976
GO:0045580	GO:0045580	regulation of T cell differentiation	113	-0.488413	-2.0642	6.45074e-07	6.69778e-06	3.64507e-06	1927	tags=35%	list=13%	signal=30%	3071/9308/57630/84807/54440/3606/11006/3707/56603/301/1840/9580/11221/84433/941/114548/604/861/3965/942/6935/4092/10288/8744/3718/3111/80149/3559/1960/972/64115/652/7048/2737/3566/940/1378/64332/4773
GO:0045621	GO:0045621	positive regulation of lymphocyte differentiation	79	-0.549874	-2.20237	6.45328e-07	6.69778e-06	3.64507e-06	3162	tags=53%	list=21%	signal=42%	7040/8767/7292/2323/57178/4860/51043/1540/5788/9655/387/695/3071/9308/286410/558/84807/54440/3606/11006/3707/301/2621/11221/941/114548/604/861/3965/942/10288/8744/3635/4323/3559/1960/972/64115/7048/2737/3566/64332
GO:0030203	GO:0030203	glycosaminoglycan metabolic process	133	-0.471305	-2.04137	6.51608e-07	6.74557e-06	3.67108e-06	2606	tags=41%	list=17%	signal=34%	2588/55454/11046/3340/6484/2817/8509/54480/113189/29940/56548/6482/4790/9957/3037/7358/2683/9469/9435/6382/3038/284/3425/51363/5292/3553/2247/22856/5159/79586/2239/3082/3339/133584/176/64131/5549/960/1462/633/9955/6383/50515/5155/2331/1634/1464/2134/4060/11227/10082/10090/57214/10894
GO:0072012	GO:0072012	glomerulus vasculature development	23	-0.757722	-2.35082	6.68427e-07	6.90194e-06	3.75618e-06	1740	tags=65%	list=11%	signal=58%	7010/284/5175/5159/2828/285/4854/1958/947/5156/652/5155/59/80310/6943
GO:0045428	GO:0045428	regulation of nitric oxide biosynthetic process	51	-0.615438	-2.27137	6.73843e-07	6.94007e-06	3.77693e-06	2155	tags=43%	list=14%	signal=37%	1191/5311/9314/7442/3586/948/3553/445/3643/199/857/64581/80149/3383/947/7099/3689/140885/10365/5740/406994/5743
GO:0045671	GO:0045671	negative regulation of osteoclast differentiation	22	-0.767324	-2.35668	6.7673e-07	6.95202e-06	3.78344e-06	1630	tags=59%	list=11%	signal=53%	11025/11006/84959/10272/9935/5295/10859/10234/3635/2200/7098/7099/6348
GO:0071621	GO:0071621	granulocyte chemotaxis	77	-0.55264	-2.2014	6.83326e-07	7.00192e-06	3.81059e-06	2423	tags=51%	list=16%	signal=43%	728/8729/3269/83700/2920/5142/27202/3071/7409/3557/683/301/5293/9750/30817/3553/120425/4354/2207/1240/6347/6279/1441/1435/2921/7857/59341/719/3689/6351/3680/8291/972/6348/6349/6280/5919/9353/7057
GO:0031532	GO:0031532	actin cytoskeleton reorganization	92	-0.520909	-2.131	7.10872e-07	7.26569e-06	3.95414e-06	1770	tags=41%	list=12%	signal=37%	116985/10458/7010/9886/9535/6464/2316/3059/301/397/8829/221692/9294/26499/1901/4627/27/8477/4739/9564/10411/3055/2059/64098/55742/59341/5341/2039/84168/57091/8572/2934/7226/29984/5156/1436/10278/2252
GO:0003007	GO:0003007	heart morphogenesis	209	-0.409739	-1.87315	7.18101e-07	7.32099e-06	3.98424e-06	1976	tags=25%	list=13%	signal=22%	5311/3037/8321/9464/7010/4846/6722/8854/8829/9645/7291/5292/7168/2702/1901/10370/4487/3643/6091/7122/10439/4092/4634/55742/10848/6909/140706/6261/2022/23129/94/10252/652/6586/7048/9510/10395/6615/79633/115701/3725/2006/57493/6608/1289/1363/9249/7046/9353/3491/1301/6423
GO:0042254	GO:0042254	ribosome biogenesis	291	0.369453	1.75039	7.44403e-07	7.56998e-06	4.11974e-06	6794	tags=59%	list=44%	signal=33%	26609/10799/23212/29093/3669/51491/84135/55299/4839/64965/9816/65008/79863/29960/55759/26155/25926/705/27043/8886/11103/80135/7514/50628/51121/55651/134430/25879/115416/5901/10556/2483/4927/51602/153443/8568/54606/51154/10775/57418/51010/23517/27079/55011/84128/9875/29102/91893/11056/64979/708/260294/51729/51116/79707/6839/51001/51106/55720/196074/23404/90459/10528/10199/6123/85395/79066/55226/54…
GO:0006415	GO:0006415	translational termination	104	0.492818	2.04379	7.58629e-07	7.69521e-06	4.1879e-06	6737	tags=80%	list=44%	signal=45%	54148/64968/92259/29093/51318/28998/64965/65008/54534/51258/57129/64983/3396/51373/23107/84340/64960/28977/55168/56945/55173/64978/10884/60488/219927/740/10573/79590/64951/65080/64979/51116/51253/11222/26589/6150/65005/54516/51264/51649/54460/55037/51023/90480/122704/9553/51642/28957/91574/84311/51069/51263/5018/51081/54948/65993/28973/64976/6183/9801/29088/64928/54998/2733/6182/29074/26284/64949…
GO:2000181	GO:2000181	negative regulation of blood vessel morphogenesis	98	-0.519551	-2.15981	8.09042e-07	8.18596e-06	4.45497e-06	2050	tags=38%	list=13%	signal=33%	64218/64855/22846/5797/9314/161742/7010/1284/3087/10769/4804/51738/56999/1969/6915/5371/28984/7075/641700/3339/2828/4303/79812/285/6678/23213/1634/90993/10365/11117/407006/23166/5054/406994/7058/5764/7057
GO:0010948	GO:0010948	negative regulation of cell cycle process	320	0.352952	1.70175	8.80635e-07	8.88802e-06	4.83705e-06	905	tags=15%	list=6%	signal=15%	641/891/7272/991/9232/995/6241/9212/701/1869/983/6790/9700/699/144455/2810/63967/990/1111/84072/51512/51514/5347/10403/79733/4998/84101/9319/8091/26271/90381/100126316/4085/54908/1063/5888/899/8317/4751/27085/2146/81620/11073/8883/655/2956/23026/7517/138151
GO:0090288	GO:0090288	negative regulation of cellular response to growth factor stimulus	131	-0.476255	-2.05606	8.95957e-07	8.98954e-06	4.8923e-06	2608	tags=40%	list=17%	signal=33%	283149/6422/3303/7316/81792/574506/2817/2734/153090/7041/10140/51341/64855/858/64388/6497/8321/57154/26585/81848/23111/3087/65997/94031/10272/114990/6498/4092/79812/857/2200/406890/54829/25960/10252/50515/83891/23213/7048/1634/55959/7043/90993/375387/4681/11117/7046/8862/9353/5654/7057/6423
GO:0006469	GO:0006469	negative regulation of protein kinase activity	208	-0.414599	-1.89779	8.97499e-07	8.98954e-06	4.8923e-06	2580	tags=30%	list=17%	signal=26%	5788/6422/9655/1850/6609/868/1848/10519/3315/2776/153090/51422/10221/28951/3611/1026/9647/1847/1849/5998/11314/161742/1845/9535/5997/84959/81848/3087/7128/26191/200734/26524/55450/54922/9467/11221/4067/3553/1028/10019/9021/857/7345/9052/1029/407000/389119/11213/1843/7070/23603/10252/652/54206/85450/57493/1030/64798/3480/4616/5999/1844/6423
GO:0061437	GO:0061437	renal system vasculature development	25	-0.750336	-2.36495	8.99624e-07	8.98954e-06	4.8923e-06	1976	tags=68%	list=13%	signal=59%	5311/7010/284/8829/5175/5159/2828/285/4854/1958/947/5156/652/5155/59/80310/6943
GO:0061440	GO:0061440	kidney vasculature development	25	-0.750336	-2.36495	8.99624e-07	8.98954e-06	4.8923e-06	1976	tags=68%	list=13%	signal=59%	5311/7010/284/8829/5175/5159/2828/285/4854/1958/947/5156/652/5155/59/80310/6943
GO:0002762	GO:0002762	negative regulation of myeloid leukocyte differentiation	38	-0.66385	-2.28837	9.35962e-07	9.3271e-06	5.07601e-06	2210	tags=50%	list=14%	signal=43%	10221/140685/11025/11006/84959/4067/10272/9935/5295/10859/10234/3635/2200/7098/4609/7099/714/6348/3624
GO:0051225	GO:0051225	spindle assembly	103	0.491976	2.03202	9.38037e-07	9.3271e-06	5.07601e-06	3371	tags=42%	list=22%	signal=33%	3833/991/332/259266/9212/22974/6790/4605/24137/29127/3832/5347/10615/26271/9493/4751/387103/29899/3796/347688/54627/440145/11200/57519/147872/55142/114791/29901/54801/93323/79598/115106/1104/126731/6795/54617/79441/8841/55125/203068/49856/10426/9126
GO:0043030	GO:0043030	regulation of macrophage activation	43	-0.653054	-2.31007	9.45155e-07	9.37473e-06	5.10193e-06	2314	tags=47%	list=15%	signal=40%	3949/2896/84868/399687/3586/9572/9173/8877/6542/8530/80149/2213/7099/972/6348/3566/54209/11326/7057/3569
GO:0014909	GO:0014909	smooth muscle cell migration	73	-0.562115	-2.20542	9.88445e-07	9.78002e-06	5.32249e-06	2210	tags=45%	list=14%	signal=39%	10221/3611/5467/9732/3037/1902/5592/50507/8829/7168/10631/5159/3486/4303/199/55742/596/693223/3690/5327/407000/8013/1636/5155/9510/4035/5328/80310/407006/8840/9353/5054/3479
GO:0061640	GO:0061640	cytoskeleton-dependent cytokinesis	96	0.5027	2.05435	1.00297e-06	9.88401e-06	5.37909e-06	1191	tags=23%	list=8%	signal=21%	51203/54443/10112/9212/1058/9700/24137/29127/5347/3925/9585/11113/1894/9493/55165/3619/346288/81620/55521/26586/675/9475
GO:0031663	GO:0031663	lipopolysaccharide-mediated signaling pathway	52	-0.612962	-2.27155	1.00386e-06	9.88401e-06	5.37909e-06	2418	tags=48%	list=16%	signal=41%	7124/3654/5581/10221/114769/3606/4846/5724/4792/7128/26191/3656/948/4067/1604/3553/23643/3055/6347/23328/7097/7099/9450/6348/929
GO:0006809	GO:0006809	nitric oxide biosynthetic process	61	-0.590722	-2.24327	1.05317e-06	1.03442e-05	5.62952e-06	2155	tags=44%	list=14%	signal=38%	384/7124/1191/5311/9314/7442/3586/4846/948/3553/445/3643/6542/199/857/64581/80149/3383/1545/947/7099/3689/140885/10365/5740/406994/5743
GO:0048708	GO:0048708	astrocyte differentiation	62	-0.583479	-2.21835	1.11459e-06	1.09208e-05	5.94334e-06	2811	tags=47%	list=18%	signal=38%	135/25/3913/728/7124/3949/2896/6774/55553/25825/9572/10319/3553/6886/6279/23529/7431/1956/7099/4035/4920/10100/712/5270/3400/6608/54209/3976/3569
GO:0030323	GO:0030323	respiratory tube development	148	-0.456202	-2.0183	1.17211e-06	1.14565e-05	6.23489e-06	1642	tags=26%	list=11%	signal=23%	4846/3988/6722/91461/8854/23210/4054/2246/10272/5159/1512/1522/1956/64759/4323/3371/10252/6678/9509/5156/2034/652/7048/57333/2737/7043/54206/6943/57493/10365/10630/1490/7068/83716/5764/4015/2252/3976
GO:0006022	GO:0006022	aminoglycan metabolic process	140	-0.451335	-1.96229	1.18054e-06	1.1511e-05	6.26453e-06	2606	tags=39%	list=17%	signal=33%	2588/55454/11046/3340/6484/2817/8509/54480/113189/29940/56548/6482/4790/9957/3037/7358/2683/9469/9435/6382/3038/284/3425/51363/5292/3553/2247/22856/5159/79586/2239/3082/3339/133584/176/64131/5549/960/1462/633/9955/6383/84752/50515/5155/2331/1634/1464/2134/4060/11227/10082/10090/57214/10894
GO:0033135	GO:0033135	regulation of peptidyl-serine phosphorylation	109	-0.497524	-2.09107	1.18558e-06	1.15322e-05	6.27608e-06	2418	tags=30%	list=16%	signal=26%	7124/7349/1756/1389/85456/9647/57600/3589/3059/5334/284/5587/5979/2621/54541/57731/3082/10411/4092/596/10268/857/9770/1956/960/10044/2039/406994/5008/5743/3976/3569/6423
GO:0031297	GO:0031297	replication fork processing	32	0.678333	2.20829	1.19719e-06	1.16171e-05	6.32225e-06	2550	tags=56%	list=17%	signal=47%	641/4796/146956/5888/253714/5111/1663/675/57697/378708/9984/10189/55159/1763/348654/54465/84083/201254
GO:0030038	GO:0030038	contractile actin filament bundle assembly	89	-0.52962	-2.16	1.22663e-06	1.18456e-05	6.44665e-06	2633	tags=45%	list=17%	signal=37%	221061/6422/389/51466/387/9647/7454/1902/116985/55616/6722/4070/50507/8829/5829/221692/10174/85462/7791/22998/7984/28984/7168/1901/5295/8477/29109/10411/10391/3693/90102/22899/79822/55160/10395/7043/10580/2006/1490/7046
GO:0043149	GO:0043149	stress fiber assembly	89	-0.52962	-2.16	1.22663e-06	1.18456e-05	6.44665e-06	2633	tags=45%	list=17%	signal=37%	221061/6422/389/51466/387/9647/7454/1902/116985/55616/6722/4070/50507/8829/5829/221692/10174/85462/7791/22998/7984/28984/7168/1901/5295/8477/29109/10411/10391/3693/90102/22899/79822/55160/10395/7043/10580/2006/1490/7046
GO:0032602	GO:0032602	chemokine production	73	-0.559029	-2.19331	1.23336e-06	1.18665e-05	6.45798e-06	1671	tags=38%	list=11%	signal=34%	3586/3606/1969/7291/3553/4155/247/10631/9173/114899/3965/199/6279/7097/64581/59341/1958/7098/7099/140885/972/51284/1436/4035/3566/6280/54209/3569
GO:0014002	GO:0014002	astrocyte development	33	-0.698886	-2.34437	1.23468e-06	1.18665e-05	6.45798e-06	2595	tags=64%	list=17%	signal=53%	135/3913/728/7124/3949/2896/25825/9572/10319/3553/6279/7431/1956/7099/4035/4920/10100/712/6608/54209/3569
GO:0033673	GO:0033673	negative regulation of kinase activity	226	-0.401956	-1.85255	1.25408e-06	1.20242e-05	6.54382e-06	2580	tags=29%	list=17%	signal=25%	5788/6422/90007/9655/1850/6609/868/1848/10519/3315/2776/153090/51422/10221/28951/3611/1026/9647/1847/1849/5998/11314/161742/1845/9535/5997/84959/81848/3087/7128/26191/200734/8660/26524/55450/54922/9467/11221/4067/3553/1028/10019/113791/9021/857/7345/9052/1029/407000/389119/11213/1843/7070/23603/10252/652/54206/85450/57493/1030/64798/3480/4616/5999/1844/6423
GO:0051056	GO:0051056	regulation of small GTPase mediated signal transduction	316	-0.365681	-1.74578	1.2836e-06	1.2278e-05	6.68197e-06	3177	tags=37%	list=21%	signal=30%	26084/11214/57221/6453/5516/22821/382/6714/10160/23526/64857/56882/29/23550/8878/25/58504/10603/4650/55843/55114/23189/8874/57569/57522/389/2859/387/6494/8729/153090/391/143872/57449/115727/117289/89846/286530/91614/3688/7409/83892/9411/84952/9289/1902/23362/116985/9886/6464/128272/389337/2057/51291/3707/81848/10156/2245/392/64411/397/9750/8829/9912/9922/8660/23433/64333/54922/9828/221472/4067/79…
GO:0006405	GO:0006405	RNA export from nucleus	131	0.455179	1.95451	1.31643e-06	1.25622e-05	6.83663e-06	6529	tags=68%	list=43%	signal=39%	55706/9688/23212/84321/10212/51692/9631/26993/129401/8480/9984/10189/6741/55110/57122/7514/23225/5433/57510/10762/5901/29118/4927/4686/348995/54439/55339/6428/7307/9939/22916/4116/9887/10921/55677/6426/6427/8106/10250/1660/51808/23511/3181/10898/56943/55781/64062/84946/7175/55746/81929/55795/79023/23381/23279/23636/22794/2733/51362/26097/3267/6431/79902/10569/160419/84324/23049/53981/7248/10657/4…
GO:0048598	GO:0048598	embryonic morphogenesis	469	-0.332181	-1.63841	1.32676e-06	1.26309e-05	6.87402e-06	1937	tags=21%	list=13%	signal=19%	3688/64388/9314/6497/7358/23187/26018/8321/23528/3557/9464/5916/80736/3586/1284/3685/6722/56603/9750/8854/8434/1969/5979/9645/7291/26011/4318/25861/3203/91663/9935/1028/2702/4155/2247/3216/55614/6886/2321/579/677/4487/6935/3693/90102/9021/57167/9839/6909/3690/2200/4323/187/2487/2022/2335/1291/8013/84913/3689/7424/3912/115908/50515/5156/23213/652/144165/7048/2737/221833/10395/4237/4920/6615/7043/6…
GO:0046634	GO:0046634	regulation of alpha-beta T cell activation	75	-0.551625	-2.18499	1.35434e-06	1.28631e-05	7.00035e-06	3043	tags=57%	list=20%	signal=46%	7292/10808/4860/3659/51043/135/5788/29126/384/9655/975/387/916/8764/3071/11314/9308/57630/84807/54440/3606/3707/301/1604/941/114548/10859/604/861/3965/942/4092/3133/3718/80149/64926/64115/7048/2737/3077/3566/940/64332
GO:0042102	GO:0042102	positive regulation of T cell proliferation	74	-0.556221	-2.19992	1.39463e-06	1.32145e-05	7.19161e-06	2580	tags=49%	list=17%	signal=41%	5788/29126/3485/283234/975/916/84868/3071/80381/54440/3606/301/10673/84433/1604/3553/920/941/3965/942/3115/199/10288/3133/8744/3718/3109/64926/3113/3559/80380/30835/7048/940/3479/3569
GO:0000910	GO:0000910	cytokinesis	156	0.439852	1.94257	1.4133e-06	1.336e-05	7.27081e-06	1523	tags=23%	list=10%	signal=21%	51203/54443/10112/9212/1058/9928/6790/9700/144455/990/24137/29127/5347/9055/3925/79733/9585/11113/1894/9493/55165/3619/79187/346288/81620/55521/26586/54627/675/9475/801/126520/201161/79848/288/9738
GO:0002576	GO:0002576	platelet degranulation	107	-0.494762	-2.07434	1.42334e-06	1.34234e-05	7.30531e-06	2235	tags=42%	list=15%	signal=36%	10447/9948/1191/81/5768/10916/2157/7114/5099/7414/5660/2316/5552/7094/7123/2621/948/83706/5175/4067/10257/2207/22927/3082/3690/5341/2335/2039/308/7424/6678/710/6414/3671/5155/1893/87/7043/7078/7450/5919/5054/3479/7057/2162
GO:0010952	GO:0010952	positive regulation of peptidase activity	165	-0.440384	-1.9673	1.44732e-06	1.36176e-05	7.41101e-06	2459	tags=30%	list=16%	signal=26%	8301/7124/8717/1611/387/2902/1612/2896/9966/10550/83595/23151/9647/6774/834/8743/83874/5641/4804/64170/5371/4067/4155/114548/1512/3965/6091/837/6279/22861/857/64581/64065/2335/355/84168/4609/2192/2934/64115/3428/57333/10395/5118/1490/6280/1378/3491/2152/6423
GO:0044774	GO:0044774	mitotic DNA integrity checkpoint	104	0.486379	2.01709	1.45342e-06	1.36432e-05	7.4249e-06	2735	tags=33%	list=18%	signal=27%	641/891/7153/995/1869/983/6790/144455/2810/63967/990/51512/79733/4998/8091/90381/146956/4436/11073/8883/5111/595/11200/65975/5591/55159/5884/1027/1017/29980/57472/54962/3364/7155
GO:0050907	GO:0050907	detection of chemical stimulus involved in sensory perception	89	0.503178	2.03592	1.49124e-06	1.39657e-05	7.60042e-06	5430	tags=64%	list=35%	signal=42%	1469/390538/441669/4995/729759/343171/50839/5284/391190/26531/391192/390323/390037/391112/282763/259296/50838/50840/127062/341152/259295/259293/259290/442191/4991/219982/285659/4025/26533/391191/81099/219981/26246/127623/390199/120793/127064/119682/391211/390036/79549/259292/390264/259294/125963/8383/162998/219447/390882/26693/26664/390445/26245/26333/390093/26689/284433
GO:0001822	GO:0001822	kidney development	238	-0.392986	-1.82564	1.49578e-06	1.39756e-05	7.60583e-06	1841	tags=30%	list=12%	signal=27%	56913/3611/8516/84445/5311/3037/9863/2650/7010/6382/28999/26108/760/56603/9788/284/4070/11020/8854/8829/5979/2028/5420/64412/23210/5175/4318/2246/10272/1028/2247/5159/445/1512/84159/2828/4092/285/596/4854/2200/1958/4609/25959/947/3399/5228/1636/10252/4811/5156/23213/652/5155/1634/2737/9510/55959/59/255743/79633/84662/80310/6943/80000/6608/170690/7046/4038/9353/3976
GO:0001655	GO:0001655	urogenital system development	278	-0.378773	-1.79313	1.53077e-06	1.42694e-05	7.76573e-06	1841	tags=27%	list=12%	signal=24%	9863/2650/5916/7010/6382/28999/26108/5660/760/56603/301/9788/284/4070/11020/8854/8829/5979/2028/5420/64412/23210/5175/4318/2246/10272/1028/2247/247/5159/445/5324/9420/1512/84159/4774/2828/1282/4092/285/2099/596/4854/2200/1958/4609/25959/947/3399/5228/3371/1636/10252/4811/5156/23213/652/5155/1634/2737/9510/55959/59/255743/79633/84662/80310/6943/3400/80000/6608/170690/7046/4038/9353/3976
GO:0033627	GO:0033627	cell adhesion mediated by integrin	61	-0.584269	-2.21876	1.53924e-06	1.43153e-05	7.79067e-06	2316	tags=44%	list=15%	signal=38%	916/10519/8754/3688/3071/3685/1969/5979/5420/83706/1803/4067/3693/9780/3690/2200/3383/1545/3689/5328/255743/9358/3678/5054/1307/22801/6423
GO:0001952	GO:0001952	regulation of cell-matrix adhesion	104	-0.494156	-2.06122	1.57524e-06	1.46164e-05	7.95454e-06	2362	tags=38%	list=15%	signal=32%	387/916/10519/23499/59339/3611/9647/1845/683/7010/79834/8829/948/3987/22998/10631/5295/604/1435/596/90102/4814/4323/1029/2039/1012/7070/23603/94/29984/4035/5328/10395/1946/4921/2824/5054/1307/7057
GO:0007369	GO:0007369	gastrulation	156	-0.445702	-1.9803	1.60371e-06	1.48463e-05	8.07966e-06	2223	tags=29%	list=15%	signal=25%	8324/3914/83595/8516/3688/9314/7358/23187/3557/3586/1284/3685/6722/1969/26011/4318/91663/4155/55614/6886/3693/90102/3690/4323/187/2335/1291/8013/84913/3689/3912/652/7048/6615/3624/1289/407006/8862/3678/1290/1295/4313/1303/1301/6423
GO:0150077	GO:0150077	regulation of neuroinflammatory response	27	-0.723666	-2.29211	1.67267e-06	1.5446e-05	8.40602e-06	2580	tags=67%	list=17%	signal=56%	5788/7124/3949/2896/3606/9572/4318/3553/8877/131450/8530/26471/7133/6348/54209/3479/5743/3569
GO:0045862	GO:0045862	positive regulation of proteolysis	315	-0.367897	-1.75506	1.67616e-06	1.5446e-05	8.40602e-06	2502	tags=26%	list=16%	signal=22%	3303/9655/8301/7124/8717/1611/387/2902/9695/153090/1612/10221/2896/9966/10550/28951/83595/1191/23151/863/9647/6774/8754/834/8743/83874/57154/255488/5641/825/10769/9532/4804/10418/7123/64170/5371/4067/3553/4155/431705/4627/641700/114548/257364/1512/3965/6091/4092/837/6279/22861/857/85409/64581/64065/80149/4323/26471/7133/2335/355/84168/4609/2192/2934/152503/64115/3428/1601/144165/57333/10395/5118/…
GO:0072507	GO:0072507	divalent inorganic cation homeostasis	361	-0.349723	-1.69069	1.70289e-06	1.56565e-05	8.52058e-06	3103	tags=34%	list=20%	signal=28%	22821/5310/29887/2946/6263/6786/3777/90550/2280/488/817/133/2053/1234/2587/25/7052/11346/57190/1909/64072/2852/5788/8698/7922/23075/481/2859/728/1756/2902/5581/1903/80024/5336/9481/27202/23516/2829/286530/8996/10367/5311/2826/91252/1902/7442/57007/2905/3356/64116/825/1535/3685/84959/51738/9034/3709/6781/6915/5371/5027/948/1910/2359/4067/1604/2247/9002/1901/10161/53373/920/27/1240/8477/284612/1471…
GO:0014910	GO:0014910	regulation of smooth muscle cell migration	66	-0.566096	-2.18075	1.71359e-06	1.5719e-05	8.55459e-06	2210	tags=45%	list=14%	signal=39%	10221/3611/5467/9732/3037/1902/5592/50507/8829/7168/10631/5159/3486/4303/199/596/693223/407000/8013/1636/5155/9510/4035/5328/80310/407006/8840/9353/5054/3479
GO:0021782	GO:0021782	glial cell development	91	-0.514849	-2.10108	1.767e-06	1.61721e-05	8.80119e-06	2423	tags=35%	list=16%	signal=30%	728/7124/3949/2896/3611/1191/6497/1902/10397/25825/9572/10319/26011/4067/3553/6279/7431/7097/1956/10810/7099/2934/4035/4920/10100/712/375387/3400/6608/54209/54587/3569
GO:0060485	GO:0060485	mesenchyme development	224	-0.397976	-1.83762	1.79569e-06	1.63968e-05	8.92351e-06	1660	tags=27%	list=11%	signal=24%	56920/4846/26585/6405/6386/9037/8854/8829/5979/7291/1910/28984/3553/114990/5159/72/10370/3082/677/4487/6091/10439/4092/80709/6275/152007/54437/596/90102/9839/6909/10501/2487/2022/223117/2335/4609/23603/94/8482/10252/147906/652/1601/359845/7048/59/6615/4017/7043/6943/10630/6608/1277/7046/407006/6934/54796/3569/6423
GO:1900046	GO:1900046	regulation of hemostasis	63	-0.575179	-2.19283	1.7997e-06	1.63968e-05	8.92351e-06	1655	tags=46%	list=11%	signal=41%	5592/4846/84959/6915/948/4067/2207/10019/114897/302/857/5327/5341/2039/308/947/7099/7056/5156/710/5155/5328/1311/2191/5270/10630/5054/2152/7057
GO:1903426	GO:1903426	regulation of reactive oxygen species biosynthetic process	76	-0.537487	-2.13889	1.89964e-06	1.72683e-05	9.39779e-06	2644	tags=41%	list=17%	signal=34%	215/384/7124/387/2902/1191/6774/5311/9314/7442/3586/5873/1535/948/3553/445/3643/199/857/64581/80149/3383/90527/947/7099/3689/140885/10365/5740/406994/5743
GO:0044843	GO:0044843	cell cycle G1/S phase transition	258	0.369121	1.72207	1.94187e-06	1.76124e-05	9.58503e-06	2859	tags=31%	list=19%	signal=25%	891/995/6241/1033/8318/55388/9134/1869/983/9928/6790/144455/2810/990/128239/51512/890/4173/7298/79733/4998/993/26271/81610/100126316/51053/1719/4171/8317/27085/10926/7015/2146/5427/2735/898/4174/81620/23026/84515/138151/23236/4172/5557/5111/6119/595/4176/79447/126520/5426/23649/11200/815/245711/5591/5933/51339/55159/4678/79960/5471/5932/1876/5558/1027/57695/6502/4999/1017/1104/5000/57472/54617/54…
GO:0030225	GO:0030225	macrophage differentiation	37	-0.66084	-2.27383	1.95992e-06	1.77362e-05	9.65242e-06	2321	tags=49%	list=15%	signal=41%	84456/10221/140685/3059/4318/920/6688/1435/146433/7097/714/652/1436/4920/10100/375387/3624/3976
GO:0048041	GO:0048041	focal adhesion assembly	79	-0.535163	-2.14345	1.99798e-06	1.80143e-05	9.80374e-06	1779	tags=37%	list=12%	signal=33%	8874/6422/387/23499/9647/1845/7010/79834/8829/3987/22998/10391/596/90102/10979/4323/2039/7070/23603/94/29984/4035/10395/87/1946/10580/2824/1307/7057
GO:0045669	GO:0045669	positive regulation of osteoblast differentiation	55	-0.586284	-2.20404	1.9996e-06	1.80143e-05	9.80374e-06	1204	tags=35%	list=8%	signal=32%	9260/5587/3727/23051/3082/1051/115908/1052/652/2737/255743/4921/338773/8840/3479/3491/860/3569/6423
GO:0006875	GO:0006875	cellular metal ion homeostasis	419	-0.335919	-1.64083	2.02428e-06	1.81959e-05	9.90261e-06	3103	tags=33%	list=20%	signal=27%	22821/5310/2946/23627/6263/6786/9997/3777/90550/538/151176/3091/2280/488/9114/817/133/2053/1234/2587/113235/25/7052/11346/57190/1909/64072/2852/5788/8698/7922/23075/481/2859/728/1756/2902/5581/1903/80024/5336/9481/27202/23516/2829/286530/8996/10367/23479/5311/30061/2826/1318/91252/1902/7442/57007/2905/3356/64116/825/1535/3685/84959/51738/9034/2512/3709/6781/6915/5371/5027/948/1910/2359/4067/9429/…
GO:0051924	GO:0051924	regulation of calcium ion transport	204	-0.403878	-1.847	2.05927e-06	1.84692e-05	1.00513e-05	3067	tags=36%	list=20%	signal=29%	2946/100507537/6786/57165/79026/2280/817/29763/135/25/57190/2852/7439/9454/2771/481/2859/7349/1756/387/2902/51393/5581/80024/5336/5142/5311/4846/825/1535/84959/84766/3603/6781/5371/5027/6690/4067/9002/5159/920/10859/6347/10288/302/596/10268/8832/857/1230/3383/945/187/2775/57338/6351/8614/7070/623/8291/4638/5155/10008/6348/2669/7220/287/5350/57214/57158/5743/6387/5999
GO:0071166	GO:0071166	ribonucleoprotein complex localization	124	0.456951	1.95563	2.06549e-06	1.84838e-05	1.00593e-05	6529	tags=68%	list=43%	signal=39%	55706/9688/23212/84321/10212/51692/9631/26993/129401/8480/9984/10189/6741/55110/57122/7514/23225/5433/10762/5901/29118/4927/4686/348995/55339/6428/7307/9939/22916/4116/9887/10921/55677/6426/6427/8106/10250/23511/3181/10898/56943/55781/26121/84946/7175/55746/81929/55795/79023/23381/23279/23636/22794/2733/51362/26097/3267/6431/79902/10569/160419/84324/23049/53981/7248/4869/57187/23165/65109/26019/5…
GO:0022616	GO:0022616	DNA strand elongation	24	0.73057	2.22935	2.08915e-06	1.86542e-05	1.0152e-05	3121	tags=79%	list=20%	signal=63%	51659/9837/4173/84296/5983/5984/7015/3978/4172/5111/4176/5426/64785/5425/64858/1763/10714/5422/4361
GO:0043087	GO:0043087	regulation of GTPase activity	427	-0.330754	-1.61905	2.17156e-06	1.93471e-05	1.05291e-05	2583	tags=26%	list=17%	signal=23%	8874/57569/57522/6422/57822/1793/54453/8301/6494/25780/116988/7813/2776/153090/10188/129049/391/5362/143872/134957/64407/117289/89846/9732/858/23102/3688/3071/23216/7409/5998/374403/55357/9882/9411/30851/116985/83874/10435/55616/128272/5592/51291/216/5997/10156/2245/392/64411/397/8786/81704/8829/9912/1969/5365/9922/64333/54922/3987/221472/7984/57636/257106/201176/1901/8477/57514/259173/4739/604/1…
GO:0071426	GO:0071426	ribonucleoprotein complex export from nucleus	123	0.455831	1.94799	2.28148e-06	2.02815e-05	1.10376e-05	6529	tags=67%	list=43%	signal=39%	55706/9688/23212/84321/10212/51692/9631/26993/129401/8480/9984/10189/6741/55110/57122/7514/23225/5433/10762/5901/29118/4927/4686/348995/55339/6428/7307/9939/22916/4116/9887/10921/55677/6426/6427/8106/10250/23511/3181/10898/56943/55781/84946/7175/55746/81929/55795/79023/23381/23279/23636/22794/2733/51362/26097/3267/6431/79902/10569/160419/84324/23049/53981/7248/4869/57187/23165/65109/26019/51042/8…
GO:0045444	GO:0045444	fat cell differentiation	193	-0.413433	-1.87163	2.34686e-06	2.08168e-05	1.13289e-05	2825	tags=34%	list=18%	signal=28%	51043/4929/10603/283927/406/23414/2852/6422/182/84230/25819/252995/7124/5696/79068/1389/28951/3914/7041/5467/6041/8864/2876/51341/9314/56729/3356/3589/5997/678/9572/11221/168455/11007/1488/1240/114899/1051/677/84159/3164/4320/2308/64641/59341/80149/122953/2487/8013/8291/284207/1052/1959/79689/3400/10974/7538/8840/5919/6934/84935/5743/5167/3569/6423
GO:0036297	GO:0036297	interstrand cross-link repair	53	0.587565	2.11399	2.43268e-06	2.15306e-05	1.17174e-05	2683	tags=49%	list=18%	signal=41%	29089/10635/146956/5888/55215/2175/2956/7517/84515/2189/2187/6119/64789/2176/57697/9937/7398/2188/378708/55159/375748/64858/2177/201254/2178/548593
GO:0061035	GO:0061035	regulation of cartilage development	61	-0.577907	-2.1946	2.44239e-06	2.15691e-05	1.17383e-05	1812	tags=43%	list=12%	signal=38%	55553/5916/26585/91461/150356/4054/579/5744/4094/302/649/2487/11173/94/144347/1513/652/359845/2737/4017/1490/7046/2202/8840/3491/860
GO:0019722	GO:0019722	calcium-mediated signaling	176	-0.417532	-1.87796	2.61989e-06	2.3086e-05	1.25639e-05	3003	tags=34%	list=20%	signal=27%	10645/90550/2280/488/817/1234/4772/57190/5788/9454/10725/481/7124/58529/1756/916/10519/2902/5336/933/695/2829/7462/5311/2274/2826/683/57007/2905/9034/5027/2494/1910/920/1240/10231/8877/1956/1230/5341/2039/55784/1012/57338/8445/6351/7226/6348/2906/6444/287/54209/29995/5350/3479/57158/1827/4773/2633
GO:0006275	GO:0006275	regulation of DNA replication	101	0.479954	1.9772	2.69337e-06	2.36816e-05	1.2888e-05	3374	tags=48%	list=22%	signal=37%	641/983/144455/990/890/79733/26271/90381/51053/5983/79915/79075/8317/8914/157570/10926/5984/2735/81620/63922/2956/5985/5111/675/3265/11200/146059/5982/1763/5884/58525/84083/57695/1017/29980/80174/54962/3364/27101/54617/57418/114799/2736/4361/4437/10919/9126/5515
GO:0070664	GO:0070664	negative regulation of leukocyte proliferation	58	-0.583955	-2.20842	3.07384e-06	2.69681e-05	1.46766e-05	2825	tags=52%	list=18%	signal=42%	51043/3620/29126/384/8764/84868/695/11314/3586/26585/7128/10457/2615/4067/941/1051/10859/3965/7940/942/10288/3635/7305/2213/3559/80380/64115/652/4332/11326
GO:0071675	GO:0071675	regulation of mononuclear cell migration	38	-0.644192	-2.22061	3.11181e-06	2.72419e-05	1.48256e-05	1643	tags=45%	list=11%	signal=40%	5641/26585/4067/1240/199/1435/59341/1230/719/1843/80310/4681/5919/9353/5054/6387/7057
GO:0032231	GO:0032231	regulation of actin filament bundle assembly	86	-0.522383	-2.13338	3.40953e-06	2.97835e-05	1.62088e-05	2789	tags=47%	list=18%	signal=38%	25/11346/6422/389/23075/51466/387/85358/9647/7454/1902/116985/55616/2316/50944/4070/50507/8829/5829/10174/22998/7984/28984/7168/1901/171024/5295/8477/29109/10411/10391/90102/5341/22899/79822/55160/10395/7043/1490/7046
GO:0048232	GO:0048232	male gamete generation	363	0.331435	1.61281	3.52787e-06	3.07505e-05	1.67351e-05	3098	tags=27%	list=20%	signal=22%	891/3833/9232/995/81930/1515/259266/402381/57082/55723/1869/84072/57650/29127/121355/64180/9319/10942/4603/83449/83990/5050/63979/25886/53340/91646/55706/26609/2175/120892/3148/23742/2735/79820/202051/65010/25911/51314/7704/2583/6732/84515/2189/6753/9633/51361/644186/675/3815/51668/116832/6662/136332/100125288/222698/147872/8879/4089/3306/135138/245711/124626/284071/140894/644150/8607/55779/15036…
GO:0062197	GO:0062197	cellular response to chemical stress	311	-0.360136	-1.7195	3.63444e-06	3.1611e-05	1.72034e-05	3233	tags=36%	list=21%	signal=29%	30001/135112/11277/706/5269/10276/9451/65018/3162/10333/5074/6648/6714/132864/10645/8837/538/3091/10533/488/2983/2882/4929/25/140809/406/5970/215/59338/3303/84230/133522/7124/22921/2113/116988/3315/1612/4688/10550/2876/695/8996/10367/84557/5311/55074/9314/8531/8321/5831/558/3586/5660/4846/825/1535/92241/7128/2353/301/50507/5587/5829/6513/5371/2878/948/2119/4318/11035/4170/4482/7168/388/253827/308…
GO:1901992	GO:1901992	positive regulation of mitotic cell cycle phase transition	74	0.522858	2.03004	3.67729e-06	3.19147e-05	1.73687e-05	919	tags=26%	list=6%	signal=24%	891/11065/9787/995/8318/983/9700/113130/990/51514/993/26271/7480/8317/27085/7015/898/81620/23236
GO:0002449	GO:0002449	lymphocyte mediated immunity	188	-0.415809	-1.87949	3.75387e-06	3.25093e-05	1.76923e-05	2609	tags=39%	list=17%	signal=33%	2067/5788/182/23075/567/602/7124/975/201294/200558/3426/91543/721/10538/1191/3134/84868/695/7454/7409/3106/5452/10384/720/11118/54440/3586/3105/3606/202309/5873/1130/717/3107/5027/11035/1604/3553/64005/2207/114548/10859/1512/604/3965/10312/718/716/4092/958/8741/3133/715/23529/3635/23180/6556/3383/8809/7133/2213/3119/714/713/972/3554/710/730/712/3077/3566/940/1378/3569
GO:0042063	GO:0042063	gliogenesis	232	-0.385551	-1.78816	3.88649e-06	3.35856e-05	1.8278e-05	2423	tags=29%	list=16%	signal=25%	728/7124/387/2817/3949/153090/2896/3611/9948/1880/1191/6774/6497/55553/9289/1902/28999/10397/25825/9572/301/10319/1840/26011/2119/11221/4067/3553/22891/54413/6886/5324/3908/89927/6347/6279/1435/146433/23529/7431/7097/1956/4323/10810/7133/23500/7099/2934/3912/1959/2737/1436/4035/1464/4920/6348/10100/712/5270/375387/3400/6608/407006/54209/54587/5764/3976/3569
GO:0046849	GO:0046849	bone remodeling	74	-0.542437	-2.14541	3.99579e-06	3.44562e-05	1.87518e-05	1694	tags=34%	list=11%	signal=30%	9066/760/26585/84959/7128/50507/1969/5027/4054/1901/6696/10312/1200/3635/9770/1956/3690/8792/115908/1513/1436/7043/338773/5764/3569
GO:0034446	GO:0034446	substrate adhesion-dependent cell spreading	95	-0.502064	-2.06915	4.0742e-06	3.50573e-05	1.90789e-05	2626	tags=48%	list=17%	signal=40%	23189/3913/8874/10109/1793/201294/10519/8324/3611/3914/81/8516/3037/7010/558/79834/2316/3685/126147/4070/8322/8829/5829/10319/83706/3987/91663/10631/55679/4739/3339/133584/64098/55742/10979/3690/2335/2039/84168/2192/57091/23603/3912/1946/10630/2633
GO:0030193	GO:0030193	regulation of blood coagulation	62	-0.565946	-2.15169	4.14231e-06	3.55673e-05	1.93565e-05	1655	tags=45%	list=11%	signal=40%	5592/4846/84959/6915/948/4067/2207/10019/114897/302/857/5327/5341/2039/308/947/7099/7056/5156/710/5155/5328/2191/5270/10630/5054/2152/7057
GO:0032642	GO:0032642	regulation of chemokine production	67	-0.544412	-2.10865	4.1743e-06	3.57658e-05	1.94645e-05	1450	tags=45%	list=9%	signal=41%	384/9655/7124/84868/9314/3586/1969/7291/3553/4155/247/10631/9173/114899/3965/199/7097/64581/59341/1958/7098/7099/140885/972/51284/1436/4035/3566/54209/3569
GO:0032965	GO:0032965	regulation of collagen biosynthetic process	33	-0.681954	-2.28757	4.3023e-06	3.67842e-05	2.00188e-05	1217	tags=42%	list=8%	signal=39%	28984/5159/7431/2022/407000/4261/652/114757/7043/54206/90993/1490/11117/3569
GO:0007249	GO:0007249	I-kappaB kinase/NF-kappaB signaling	240	-0.382123	-1.77996	4.46998e-06	3.81369e-05	2.07549e-05	3227	tags=38%	list=21%	signal=30%	3661/65018/11214/3162/10333/8767/56957/7188/79155/55223/8837/9220/2280/197358/8878/148022/25/7052/5970/4615/24138/389/4215/3956/7316/602/80216/353376/7124/11043/8717/5187/387/3654/3315/7132/5581/153090/80833/6398/57449/695/10346/286343/114769/834/8743/3557/10475/64127/1902/6284/84807/825/2316/4792/10769/7128/9572/284/64170/3656/5587/57161/9020/948/81603/4055/11035/84433/3553/10783/920/23643/3965/…
GO:0046633	GO:0046633	alpha-beta T cell proliferation	29	-0.692843	-2.2602	4.5357e-06	3.86158e-05	2.10155e-05	3154	tags=72%	list=21%	signal=58%	8767/7292/3659/51043/5788/29126/384/975/916/8764/57630/2000/3606/1604/3965/3133/1794/64926/64115/7048/940
GO:0007143	GO:0007143	female meiotic nuclear division	27	0.688779	2.15189	4.60242e-06	3.91012e-05	2.12797e-05	1800	tags=37%	list=12%	signal=33%	7272/7153/23397/6790/5347/9319/26271/347688/84930/284071
GO:0002718	GO:0002718	regulation of cytokine production involved in immune response	71	-0.548659	-2.14062	4.63973e-06	3.93352e-05	2.1407e-05	2520	tags=51%	list=16%	signal=43%	567/3098/7124/975/91543/8764/3134/695/64127/54440/3586/3606/284/948/3553/2207/114548/10859/604/4092/3133/3718/8809/7133/7098/8013/11213/7099/684/8482/972/3554/7043/3077/9865/3569
GO:0034612	GO:0034612	response to tumor necrosis factor	252	-0.379405	-1.77587	4.93353e-06	4.1738e-05	2.27147e-05	2603	tags=28%	list=17%	signal=24%	2852/6422/3303/7185/7124/5696/81792/8717/8718/10519/7132/153090/406943/8764/9966/3611/81/7114/8996/8754/114769/4790/3037/834/8531/7442/259230/2635/1535/4792/678/7128/9572/10673/2621/9020/3987/4055/51330/5699/10631/29965/445/8877/677/6347/837/958/83483/8741/8744/55022/80149/3383/8792/7133/1896/6351/2634/11173/8742/6348/255743/929/6349/10365/1277/7538/5743/2633/7057
GO:0070507	GO:0070507	regulation of microtubule cytoskeleton organization	176	0.40562	1.82639	4.94807e-06	4.17733e-05	2.27339e-05	2604	tags=30%	list=17%	signal=25%	81930/221150/22974/6790/1111/3832/5347/6491/3925/10615/10733/4233/79929/25886/899/220134/64793/4751/79187/29899/55521/26586/7517/10460/8045/79866/401236/9475/50861/8851/8480/85459/137886/2258/4133/157922/2288/5902/2770/7514/4137/348654/27124/348235/672/79598/1027/55835/84722/4591/79959/126731
GO:0042107	GO:0042107	cytokine metabolic process	95	-0.499667	-2.05927	4.97956e-06	4.19512e-05	2.28307e-05	2884	tags=48%	list=19%	signal=40%	3659/148022/9111/5970/5788/602/7124/9261/916/3315/9966/28951/6774/79589/4790/9314/80381/3586/3606/5724/51738/64170/5606/84433/3553/920/941/1051/10859/942/3635/64581/7305/1958/7098/7099/1536/7096/972/51284/54206/940/3624/7538/7057/3569
GO:0050728	GO:0050728	negative regulation of inflammatory response	117	-0.47674	-2.02864	5.19979e-06	4.37151e-05	2.37907e-05	2965	tags=44%	list=19%	signal=35%	29/5176/197358/135/5465/89790/215/2852/5788/9655/56833/2113/3949/7132/2896/5467/2876/55198/113/4790/9314/10203/7010/3586/406913/51738/7128/9572/58189/11221/114548/3082/114899/131450/8530/9021/100500826/80149/7133/406890/2213/3559/79626/1003/140885/284207/7130/4907/407006/5740/3479
GO:0002532	GO:0002532	production of molecular mediator involved in inflammatory response	55	-0.572456	-2.15205	5.22083e-06	4.38006e-05	2.38372e-05	2879	tags=49%	list=19%	signal=40%	197358/240/148022/3620/10225/215/84818/4615/56833/5187/2896/695/55198/113/64127/948/11221/4067/2207/6542/64581/80149/7099/140885/3566/407006/5054
GO:0009595	GO:0009595	detection of biotic stimulus	22	-0.73988	-2.27239	5.27319e-06	4.41479e-05	2.40262e-05	1086	tags=73%	list=7%	signal=68%	11277/706/10333/912/721/64127/23643/114548/7097/64581/8406/7099/7096/2191/54209/284297
GO:0070527	GO:0070527	platelet aggregation	50	-0.610384	-2.25475	5.38014e-06	4.49498e-05	2.44626e-05	1690	tags=44%	list=11%	signal=39%	7414/5592/2316/84959/7094/10077/2621/83706/4067/4627/10019/114897/10398/3690/5341/375033/2039/5156/1465/1311/5270/10630
GO:0006414	GO:0006414	translational elongation	129	0.441985	1.89452	5.48006e-06	4.56899e-05	2.48654e-05	4794	tags=56%	list=31%	signal=39%	1917/54148/64968/92259/29093/51318/28998/64965/65008/54534/51258/57129/64983/3396/51373/23107/64960/28977/55168/56945/55173/64978/10884/60488/219927/740/10573/79590/6726/64951/65080/64979/51091/51116/51253/11222/54952/26589/6150/65005/51264/1802/51649/120526/54460/55037/51023/90480/122704/92715/9553/51642/28957/51714/84311/51069/51263/5018/85476/7284/51081/54948/65993/28973/64976/6183/9801/79631/…
GO:0090307	GO:0090307	mitotic spindle assembly	55	0.56486	2.04341	5.59112e-06	4.65195e-05	2.53169e-05	1138	tags=27%	list=7%	signal=25%	3833/991/332/9212/22974/4605/24137/29127/3832/5347/9493/4751/3796/54627/440145
GO:0043409	GO:0043409	negative regulation of MAPK cascade	158	-0.429573	-1.90453	5.73947e-06	4.76554e-05	2.59351e-05	2614	tags=33%	list=17%	signal=28%	284996/2852/5788/6422/1850/6609/574506/5187/1848/153090/1847/9314/5470/1849/5998/11314/161742/1845/5997/81848/26191/2122/200734/467/5027/55450/11221/4067/3553/10019/2308/857/7345/407000/4609/11213/2192/7099/1843/140885/10252/652/54206/7078/11117/407006/3480/2633/5999/1844/3976/6423
GO:0032945	GO:0032945	negative regulation of mononuclear cell proliferation	54	-0.581395	-2.17568	5.82178e-06	4.81122e-05	2.61837e-05	2825	tags=52%	list=18%	signal=42%	51043/3620/29126/384/8764/84868/695/11314/3586/10457/2615/4067/941/1051/10859/3965/7940/942/10288/3635/7305/2213/3559/80380/64115/652/4332/11326
GO:0050672	GO:0050672	negative regulation of lymphocyte proliferation	54	-0.581395	-2.17568	5.82178e-06	4.81122e-05	2.61837e-05	2825	tags=52%	list=18%	signal=42%	51043/3620/29126/384/8764/84868/695/11314/3586/10457/2615/4067/941/1051/10859/3965/7940/942/10288/3635/7305/2213/3559/80380/64115/652/4332/11326
GO:0035710	GO:0035710	CD4-positive	alpha-beta T cell activation	73	-0.539331	-2.11602	5.83034e-06	4.81122e-05	2.61837e-05	2563	tags=48%	list=17%	signal=40%	29126/384/602/9655/975/91543/10538/1880/60437/6774/64218/3071/9308/57630/84807/54440/3606/301/1604/941/114548/604/861/3965/942/10312/4092/3718/80149/8809/64115/7048/3566/64332/3569
GO:0035904	GO:0035904	aorta development	48	-0.60473	-2.19687	5.8969e-06	4.8562e-05	2.64285e-05	2991	tags=46%	list=20%	signal=37%	54567/1948/5138/23462/182/6092/5311/6722/56999/5159/6091/11174/6909/2022/23129/94/4638/4016/144165/4035/1281/4015
GO:0043407	GO:0043407	negative regulation of MAP kinase activity	70	-0.540393	-2.11363	6.02421e-06	4.94266e-05	2.6899e-05	2422	tags=41%	list=16%	signal=35%	6422/1850/6609/1848/153090/1847/1849/5998/11314/161742/1845/5997/81848/26191/200734/11221/4067/3553/10019/857/7345/407000/11213/1843/10252/652/5999/1844/6423
GO:0042035	GO:0042035	regulation of cytokine biosynthetic process	87	-0.514895	-2.09388	6.02644e-06	4.94266e-05	2.6899e-05	2884	tags=51%	list=19%	signal=41%	3659/148022/9111/5970/5788/602/7124/9261/916/3315/28951/6774/79589/4790/9314/80381/3586/5724/51738/64170/5606/84433/3553/920/941/1051/10859/942/3635/64581/7305/1958/7098/7099/1536/7096/972/51284/54206/940/3624/7538/7057/3569
GO:1903510	GO:1903510	mucopolysaccharide metabolic process	95	-0.496351	-2.04561	6.23314e-06	5.1018e-05	2.77651e-05	2606	tags=45%	list=17%	signal=38%	2588/55454/11046/3340/6484/8509/54480/113189/29940/56548/6482/4790/3037/7358/2683/9469/9435/3038/284/3425/51363/5292/3553/2247/22856/79586/3082/133584/176/64131/5549/960/1462/633/50515/5155/2331/1634/1464/4060/10090/57214/10894
GO:0048762	GO:0048762	mesenchymal cell differentiation	185	-0.400067	-1.80954	6.37413e-06	5.20662e-05	2.83355e-05	1660	tags=26%	list=11%	signal=24%	56920/26585/6405/6386/9037/8854/8829/5979/7291/1910/28984/3553/114990/3082/4487/10439/4092/80709/6275/152007/54437/596/90102/9839/10501/2487/2022/223117/2335/23603/8482/10252/147906/652/1601/359845/7048/6615/4017/7043/6943/10630/6608/1277/7046/407006/6934/3569/6423
GO:0009615	GO:0009615	response to virus	266	-0.363867	-1.7175	6.58255e-06	5.36598e-05	2.92028e-05	2884	tags=31%	list=19%	signal=26%	3659/55601/90865/148022/10577/10875/81622/5970/3588/5788/6773/24138/602/10625/9582/6397/7124/201294/79132/8729/91543/3315/406919/661/1191/4939/53840/6041/10346/115004/8519/10475/4940/3437/200316/3663/2635/151636/2316/83666/1130/2537/7128/64170/10077/81844/5371/9020/10561/6039/3434/54541/50506/3553/114548/10859/3433/3965/5359/27350/958/4938/596/55509/10964/80149/10410/3559/7098/11213/684/6351/3429…
GO:0006399	GO:0006399	tRNA metabolic process	163	0.415712	1.8493	6.72355e-06	5.46984e-05	2.97681e-05	7512	tags=75%	list=49%	signal=39%	10799/92935/7965/129450/51728/10056/92675/93587/51605/6741/51002/9836/9097/9521/54938/8270/55157/1478/64172/55278/79731/6894/10556/116461/283989/54931/51067/10775/25973/51010/123263/54802/84881/11062/134637/51091/55520/339487/23404/5464/54517/55644/55226/54859/126789/60528/80745/23438/79691/10898/26610/8518/2193/54888/55798/9692/339175/2926/79897/10785/57176/23587/124454/27068/1653/55699/23395/42…
GO:0032692	GO:0032692	negative regulation of interleukin-1 production	24	-0.726973	-2.26557	6.79388e-06	5.51592e-05	3.00188e-05	2076	tags=54%	list=14%	signal=47%	1992/114769/3586/51738/7128/5371/2621/114548/80149/945/54206/54209/3479
GO:0042089	GO:0042089	cytokine biosynthetic process	94	-0.497093	-2.05023	6.8536e-06	5.55321e-05	3.02217e-05	2884	tags=48%	list=19%	signal=39%	3659/148022/9111/5970/5788/602/7124/9261/916/3315/28951/6774/79589/4790/9314/80381/3586/3606/5724/51738/64170/5606/84433/3553/920/941/1051/10859/942/3635/64581/7305/1958/7098/7099/1536/7096/972/51284/54206/940/3624/7538/7057/3569
GO:0016072	GO:0016072	rRNA metabolic process	222	0.379435	1.7461	6.95319e-06	5.62259e-05	3.05993e-05	6840	tags=61%	list=45%	signal=34%	10799/23212/3669/84135/4839/64965/65008/79863/29960/55759/25926/705/27043/8886/11103/80135/4137/50628/55651/134430/25879/10556/2483/51602/153443/8568/54606/51154/10775/57418/51010/23517/27079/55011/84128/9875/29102/91893/11056/10595/260294/51729/79707/6839/51106/55720/84365/196074/23404/90459/10528/10199/85395/79066/55226/54881/4931/51018/88745/55636/8945/9277/10436/55127/55781/6201/23560/5036/22…
GO:1904645	GO:1904645	response to amyloid-beta	42	-0.625942	-2.20248	7.42137e-06	5.98915e-05	3.25942e-05	1643	tags=38%	list=11%	signal=34%	5641/4804/23621/948/4318/837/10268/10135/3383/2213/7099/4035/54209/3480/3479/4313
GO:0001953	GO:0001953	negative regulation of cell-matrix adhesion	34	-0.662861	-2.25388	7.4667e-06	6.01368e-05	3.27277e-05	1128	tags=38%	list=7%	signal=35%	10631/5295/604/90102/4323/1029/2039/23603/94/4035/10395/5054/7057
GO:0071459	GO:0071459	protein localization to chromosome	centromeric region	20	0.744547	2.15252	7.51628e-06	6.04153e-05	3.28793e-05	1132	tags=50%	list=7%	signal=46%	7272/9212/57082/1058/983/10403/54908/27085/81620/55166
GO:0072001	GO:0072001	renal system development	249	-0.376929	-1.76457	7.56237e-06	6.06647e-05	3.3015e-05	1841	tags=27%	list=12%	signal=24%	9863/2650/7010/6382/28999/26108/760/56603/9788/284/4070/11020/8854/8829/5979/2028/5420/64412/23210/5175/4318/2246/10272/1028/2247/5159/445/1512/84159/4774/2828/1282/4092/285/596/4854/2200/1958/4609/25959/947/3399/5228/1636/10252/4811/5156/23213/652/5155/1634/2737/9510/55959/59/255743/79633/84662/80310/6943/80000/6608/170690/7046/4038/9353/3976
GO:0007517	GO:0007517	muscle organ development	311	-0.353904	-1.68975	7.85091e-06	6.28541e-05	3.42065e-05	2731	tags=31%	list=18%	signal=26%	57190/51676/5465/406/1489/23414/9172/283149/4534/26508/1144/3679/3131/58529/1756/387/2817/2260/5463/8324/9734/4209/2876/64855/858/6840/6497/8531/8321/7832/55553/1293/825/5997/26585/2353/56603/9750/467/7291/5292/22808/7168/2247/2115/1901/10791/445/3908/84159/4487/4303/4092/4634/596/59269/2275/857/6909/1958/140706/6261/26471/2022/6525/64091/1960/3399/1839/9242/4638/463/23764/652/1959/7048/1634/2273…
GO:0050818	GO:0050818	regulation of coagulation	65	-0.549745	-2.11062	7.96614e-06	6.36501e-05	3.46397e-05	1655	tags=43%	list=11%	signal=39%	5592/4846/84959/6915/948/4067/2207/10019/114897/302/857/5327/5341/2039/308/947/7099/7056/5156/710/5155/5328/2191/5270/10630/5054/2152/7057
GO:1902751	GO:1902751	positive regulation of cell cycle G2/M phase transition	29	0.669736	2.10769	8.27564e-06	6.59921e-05	3.59143e-05	1725	tags=41%	list=11%	signal=37%	891/995/983/51514/993/26271/79915/7480/8317/595/219736/3306
GO:0070192	GO:0070192	chromosome organization involved in meiotic cell cycle	49	0.59975	2.1303	8.65086e-06	6.88479e-05	3.74685e-05	3517	tags=59%	list=23%	signal=46%	23397/701/9134/699/84072/9319/10592/83990/5888/55706/9918/256126/151246/898/10051/644186/23310/147872/284071/285498/150365/9985/2177/5889/23353/4361/10734/100130958/283847
GO:0071356	GO:0071356	cellular response to tumor necrosis factor	236	-0.371961	-1.72825	8.67012e-06	6.8865e-05	3.74778e-05	2603	tags=29%	list=17%	signal=24%	2852/6422/3303/7185/7124/5696/81792/8717/8718/10519/7132/153090/406943/8764/9966/3611/81/7114/8996/114769/4790/3037/834/8531/7442/259230/2635/1535/4792/678/7128/9572/10673/2621/9020/3987/4055/51330/5699/10631/29965/445/8877/677/6347/837/958/83483/8741/8744/55022/80149/3383/8792/7133/1896/6351/2634/11173/8742/6348/255743/6349/10365/1277/7538/2633/7057
GO:0010001	GO:0010001	glial cell differentiation	173	-0.406829	-1.82884	8.77878e-06	6.95908e-05	3.78728e-05	2423	tags=31%	list=16%	signal=26%	728/7124/387/2817/3949/2896/3611/9948/1191/6774/6497/55553/1902/28999/10397/25825/9572/10319/1840/26011/11221/4067/3553/22891/54413/6886/3908/6279/146433/23529/7431/7097/1956/10810/7133/23500/7099/2934/1959/2737/4035/4920/10100/712/5270/375387/3400/6608/54209/54587/5764/3976/3569
GO:0010959	GO:0010959	regulation of metal ion transport	312	-0.352934	-1.68784	8.85101e-06	7.00256e-05	3.81094e-05	2954	tags=32%	list=19%	signal=26%	538/57165/79026/2280/817/30818/29763/9368/135/25/967/57190/130497/2852/57520/7439/567/9454/2771/481/3755/23072/2859/7349/5187/1756/387/2902/51393/6324/5581/80024/5336/5142/81/23479/5311/1318/81831/3356/4846/825/2316/1535/84959/84766/3603/7871/3784/6781/5371/5027/6690/4067/9002/5159/57731/920/10859/2040/6347/10288/302/53827/596/10268/8832/857/1230/3383/945/187/2775/57338/6351/8614/7070/623/8291/46…
GO:0006911	GO:0006911	phagocytosis	engulfment	43	-0.617395	-2.18393	8.98928e-06	7.09801e-05	3.86289e-05	2142	tags=51%	list=14%	signal=44%	51411/55198/3071/11314/9886/4240/286046/3684/948/2207/4627/718/199/4481/2213/3689/11031/2934/51454/54209/2209/7057
GO:0061037	GO:0061037	negative regulation of cartilage development	25	-0.717069	-2.2601	9.07389e-06	7.15079e-05	3.89161e-05	1769	tags=60%	list=12%	signal=53%	5916/26585/150356/4054/579/5744/2487/11173/144347/1513/652/359845/7046/2202/8840
GO:0042136	GO:0042136	neurotransmitter biosynthetic process	78	-0.520917	-2.07464	9.11721e-06	7.15692e-05	3.89495e-05	1976	tags=36%	list=13%	signal=31%	1191/5311/9314/7442/80736/3586/4846/948/3553/445/3643/6542/199/857/64581/80149/3383/1545/947/7099/3689/140885/1806/26002/10365/5740/406994/5743
GO:0060840	GO:0060840	artery development	78	-0.521183	-2.0757	9.11721e-06	7.15692e-05	3.89495e-05	3096	tags=45%	list=20%	signal=36%	7798/57178/7422/54567/1948/5138/23462/182/6092/3949/5311/9464/6722/56999/8829/2702/5159/6091/4092/11174/4854/6909/2022/23129/94/4638/652/4016/144165/2737/4035/1311/1281/7046/4015
GO:0046640	GO:0046640	regulation of alpha-beta T cell proliferation	26	-0.69973	-2.22823	9.21351e-06	7.21844e-05	3.92843e-05	3154	tags=81%	list=21%	signal=64%	57045/729230/8767/7292/3659/51043/5788/29126/384/975/916/8764/57630/3606/1604/3965/3133/64926/64115/7048/940
GO:0072503	GO:0072503	cellular divalent inorganic cation homeostasis	348	-0.342609	-1.64696	9.27059e-06	7.24906e-05	3.94509e-05	3103	tags=34%	list=20%	signal=27%	22821/5310/2946/6263/6786/3777/90550/2280/488/817/133/2053/1234/2587/25/7052/11346/57190/1909/64072/2852/5788/8698/7922/23075/481/2859/728/1756/2902/5581/1903/80024/5336/9481/27202/23516/2829/286530/8996/10367/5311/2826/91252/1902/7442/57007/2905/3356/64116/825/1535/3685/84959/51738/9034/3709/6781/6915/5371/5027/948/1910/2359/4067/1604/2247/9002/1901/10161/53373/920/27/1240/8477/284612/2357/2828/…
GO:0010324	GO:0010324	membrane invagination	60	-0.553455	-2.10577	9.38341e-06	7.32306e-05	3.98536e-05	2142	tags=47%	list=14%	signal=40%	1793/387/51411/55198/3071/11314/23208/9886/4240/57154/286046/3684/948/2207/4627/257364/718/199/4481/112574/2213/3689/11031/2934/51454/54209/2209/7057
GO:0010971	GO:0010971	positive regulation of G2/M transition of mitotic cell cycle	26	0.690684	2.13432	1.00485e-05	7.82697e-05	4.25961e-05	2567	tags=50%	list=17%	signal=42%	891/995/983/51514/993/26271/7480/8317/595/219736/3306/5889/80174
GO:0007204	GO:0007204	positive regulation of cytosolic calcium ion concentration	220	-0.385363	-1.77319	1.01018e-05	7.8533e-05	4.27393e-05	2934	tags=40%	list=19%	signal=32%	2280/817/133/1234/2587/25/7052/11346/57190/1909/2852/5788/8698/23075/2859/728/1756/2902/5581/1903/80024/5336/27202/2829/286530/8996/5311/2826/1902/7442/57007/2905/3356/825/1535/3685/84959/51738/9034/3709/6915/5371/5027/948/1910/2359/4067/1604/2247/9002/1901/10161/53373/920/27/1240/8477/2357/2828/114897/2099/596/10268/857/59341/1230/5739/6261/187/5733/2769/719/57338/147/7070/623/5330/7226/5156/403…
GO:0010811	GO:0010811	positive regulation of cell-substrate adhesion	107	-0.471313	-1.97603	1.0475e-05	8.1277e-05	4.42327e-05	2583	tags=40%	list=17%	signal=34%	8874/6422/10109/1793/201294/916/10519/5581/59339/3611/25890/9647/3037/7010/64094/2316/8829/948/3987/91663/55679/4739/133584/79812/1435/4814/2335/2039/1012/57091/7070/4811/255743/10085/11117/3678/2199/1842/151887/3491/1295/1307/5764
GO:0000082	GO:0000082	G1/S transition of mitotic cell cycle	241	0.363026	1.6771	1.07467e-05	8.32249e-05	4.52928e-05	2566	tags=28%	list=17%	signal=24%	891/995/6241/1033/8318/55388/9134/1869/983/9928/6790/144455/2810/990/128239/51512/4173/7298/79733/4998/993/26271/51053/1719/4171/8317/27085/10926/7015/2146/5427/898/4174/81620/23026/84515/138151/23236/4172/5557/5111/6119/595/4176/126520/5426/23649/11200/815/245711/5591/5933/51339/55159/4678/79960/5471/5932/1876/5558/1027/57695/6502/4999/1017/1104/5000/57472
GO:0050710	GO:0050710	negative regulation of cytokine secretion	54	-0.572596	-2.14275	1.07952e-05	8.344e-05	4.54098e-05	2110	tags=54%	list=14%	signal=46%	384/7124/27202/9734/7114/1992/114769/23208/3586/51738/5552/7128/301/284/26191/5371/2615/2621/28984/114548/114899/10859/131450/80149/2335/2213/947/2633/284297
GO:0008625	GO:0008625	extrinsic apoptotic signaling pathway via death domain receptors	76	-0.514915	-2.04907	1.08894e-05	8.40071e-05	4.57184e-05	2570	tags=38%	list=17%	signal=32%	6422/8682/7124/8717/7132/153090/1612/2876/8743/6810/9531/4846/7128/6672/467/5295/6498/3082/147138/596/3383/23017/355/85450/7078/407006/5054/7057/6423
GO:1901222	GO:1901222	regulation of NIK/NF-kappaB signaling	97	-0.486588	-2.01948	1.10614e-05	8.51705e-05	4.63516e-05	2487	tags=39%	list=16%	signal=33%	10725/602/7124/8717/387/3654/9966/3611/81/84868/7114/8996/51564/64127/3606/4792/26191/3987/3553/114548/114899/56892/8877/3965/23328/7097/9770/1956/80149/8809/55075/7098/7099/1896/51284/929/54209/4306
GO:0046632	GO:0046632	alpha-beta T cell differentiation	81	-0.497638	-2.00962	1.13812e-05	8.7466e-05	4.76008e-05	3043	tags=47%	list=20%	signal=38%	7292/4860/538/3659/51043/25/602/9655/387/91543/10538/1880/6774/64218/3071/9308/57630/84807/54440/3606/3707/301/941/114548/604/861/3965/942/4092/596/3718/80149/8809/7048/2737/3566/64332/3569
GO:0002262	GO:0002262	myeloid cell homeostasis	130	-0.432532	-1.86279	1.14655e-05	8.79456e-05	4.78619e-05	2520	tags=31%	list=16%	signal=26%	567/3303/1777/2113/84456/8444/83700/5142/6774/51341/3071/55553/558/3707/6722/3059/301/5293/23210/4067/9935/2207/3216/6886/10320/6777/10019/677/604/6688/3635/3718/2039/2034/652/10365/3624/407006/7538/3569
GO:0010717	GO:0010717	regulation of epithelial to mesenchymal transition	78	-0.518744	-2.06598	1.15202e-05	8.81971e-05	4.79987e-05	1601	tags=32%	list=10%	signal=29%	26585/6386/7291/28984/3553/114990/10439/4092/152007/90102/2022/147906/652/1601/7048/6615/4017/7043/10630/1277/7046/407006/6934/3569/6423
GO:0090504	GO:0090504	epiboly	28	-0.679643	-2.18213	1.1775e-05	8.98357e-05	4.88905e-05	827	tags=36%	list=5%	signal=34%	2316/90102/960/94/1839/10630/1289/407006/3678/3491
GO:1905521	GO:1905521	regulation of macrophage migration	30	-0.677466	-2.22517	1.17788e-05	8.98357e-05	4.88905e-05	1402	tags=50%	list=9%	signal=46%	728/56833/975/79148/1240/131450/1435/59341/4323/719/6348/11117/54209/5919/7057
GO:0048017	GO:0048017	inositol lipid-mediated signaling	154	-0.414393	-1.8414	1.19889e-05	9.12653e-05	4.96685e-05	2605	tags=34%	list=17%	signal=29%	22876/2852/59338/5526/7124/387/2260/153090/5336/5467/57605/9314/7010/406913/3356/3606/2057/5724/3059/5293/284/5337/8660/7291/23533/4067/118788/5159/5295/10870/2321/3082/677/3643/113791/80243/1956/55615/375033/219699/5330/2934/5156/5155/1634/1436/80310/5270/940/3480/3479/5008/8870
GO:0043271	GO:0043271	negative regulation of ion transport	117	-0.467343	-1.98866	1.20587e-05	9.16236e-05	4.98635e-05	2276	tags=32%	list=15%	signal=27%	23072/2859/2917/5581/10550/54899/23479/5311/4129/3356/4846/5997/8660/6781/6690/7291/4318/10859/10288/596/857/3383/945/2775/8291/10008/5270/2669/2564/2824/5350/406994/22925/5743/6424/7057/5999
GO:0090049	GO:0090049	regulation of cell migration involved in sprouting angiogenesis	42	-0.616598	-2.1696	1.21767e-05	9.22293e-05	5.01931e-05	3173	tags=62%	list=21%	signal=49%	3162/406888/7422/54567/25/4215/574506/387/10519/9734/51564/9314/161742/406913/10769/301/57608/8829/6915/2247/79812/57381/27286/407006/5743/7057
GO:0051348	GO:0051348	negative regulation of transferase activity	254	-0.370508	-1.7408	1.21843e-05	9.22293e-05	5.01931e-05	2580	tags=28%	list=17%	signal=23%	5788/6422/90007/9655/1850/6609/868/1848/10519/3315/2776/153090/51422/10221/28951/3611/1026/9647/1847/1849/5998/11314/161742/1845/9535/151636/5997/84959/81848/3087/9532/7128/26191/200734/8660/26524/55450/54922/9467/11221/4067/3553/1028/10019/113791/4092/9021/857/7345/9052/1029/407000/389119/11213/1843/7070/23603/10252/652/54206/85450/57493/1030/64798/7538/3480/4616/5999/1844/6423
GO:0045124	GO:0045124	regulation of bone resorption	32	-0.653039	-2.16747	1.2392e-05	9.36259e-05	5.09532e-05	1646	tags=44%	list=11%	signal=39%	760/84959/7128/5027/4054/1901/6696/3635/1956/3690/8792/1436/338773/3569
GO:0045930	GO:0045930	negative regulation of mitotic cell cycle	306	0.346291	1.64701	1.24284e-05	9.37254e-05	5.10073e-05	905	tags=15%	list=6%	signal=15%	641/891/7272/991/7153/9232/995/9212/701/11130/1869/983/6790/699/144455/2810/63967/990/1111/51512/5347/10403/57795/79733/4998/84101/9319/8091/26271/90381/4085/146956/54908/1063/220042/4436/27085/2146/7483/81620/11073/8883/655/23026/55055/7517/138151
GO:0051607	GO:0051607	defense response to virus	195	-0.396969	-1.80395	1.25024e-05	9.41067e-05	5.12149e-05	2926	tags=34%	list=19%	signal=28%	10533/3659/55601/90865/148022/10875/81622/5970/3588/5788/6773/24138/9582/6397/201294/79132/91543/661/4939/53840/6041/10346/115004/8519/10475/4940/3437/200316/3663/2635/151636/2316/83666/1130/2537/7128/64170/10077/81844/5371/9020/6039/3434/54541/3553/114548/10859/3433/5359/27350/958/4938/596/10964/80149/10410/3559/7098/684/3429/84166/51284/3428/10581/2633/5654/3569
GO:0001704	GO:0001704	formation of primary germ layer	100	-0.477683	-1.98035	1.25705e-05	9.44428e-05	5.13978e-05	2223	tags=33%	list=15%	signal=28%	8324/3914/83595/8516/3688/9314/1284/3685/6722/1969/4318/55614/6886/3693/3690/4323/2335/1291/8013/84913/3689/3912/652/6615/3624/1289/3678/1290/1295/4313/1303/1301/6423
GO:0050911	GO:0050911	detection of chemical stimulus involved in sensory perception of smell	65	0.536382	2.02826	1.28078e-05	9.60464e-05	5.22705e-05	5430	tags=69%	list=35%	signal=45%	390538/441669/4995/729759/343171/391190/26531/391192/390323/390037/391112/282763/127062/341152/442191/4991/219982/285659/26533/391191/81099/219981/26246/127623/390199/120793/127064/119682/391211/390036/79549/390264/125963/8383/162998/219447/390882/26693/26664/390445/26245/26333/390093/26689/284433
GO:0032233	GO:0032233	positive regulation of actin filament bundle assembly	57	-0.568549	-2.14626	1.28748e-05	9.63699e-05	5.24466e-05	2789	tags=49%	list=18%	signal=40%	25/11346/6422/389/23075/51466/387/9647/1902/2316/50507/8829/5829/10174/22998/7984/28984/7168/171024/8477/29109/10411/5341/22899/55160/7043/1490/7046
GO:0014015	GO:0014015	positive regulation of gliogenesis	56	-0.564558	-2.13173	1.30905e-05	9.78022e-05	5.3226e-05	1307	tags=34%	list=9%	signal=31%	26011/2119/4067/3553/22891/5324/1435/146433/23529/7097/7133/4035/6348/5270/407006/54209/5764/3976/3569
GO:0031960	GO:0031960	response to corticosteroid	130	-0.430251	-1.85297	1.32999e-05	9.91829e-05	5.39775e-05	1846	tags=31%	list=12%	signal=27%	3557/4129/6382/3586/1535/5724/678/2353/301/6781/687/3176/54541/445/677/199/3490/596/2308/1956/3291/3383/2022/5069/1536/1843/6678/6586/54206/590/1490/8061/2354/1277/266743/7538/9353/387758/5743/3569
GO:0045582	GO:0045582	positive regulation of T cell differentiation	68	-0.535827	-2.09604	1.33677e-05	9.9504e-05	5.41522e-05	3162	tags=51%	list=21%	signal=41%	7040/8767/7292/57178/4860/51043/1540/5788/9655/387/3071/9308/84807/54440/3606/11006/3707/301/11221/941/114548/604/861/3965/942/10288/8744/3559/1960/972/64115/7048/2737/3566/64332
GO:1900024	GO:1900024	regulation of substrate adhesion-dependent cell spreading	47	-0.596962	-2.15619	1.34148e-05	9.96705e-05	5.42428e-05	2789	tags=51%	list=18%	signal=42%	25/23189/8874/10109/1793/201294/10519/81/3037/2316/4070/8829/3987/91663/10631/55679/4739/2039/2192/57091/23603/1946/10630/2633
GO:0032465	GO:0032465	regulation of cytokinesis	77	0.510906	1.99768	1.35094e-05	0.000100188	5.45246e-05	1523	tags=30%	list=10%	signal=27%	10112/9212/9928/6790/144455/990/29127/5347/9055/79733/9585/11113/1894/9493/3619/79187/54627/675/801/126520/201161/79848/9738
GO:0048608	GO:0048608	reproductive structure development	337	-0.34424	-1.64972	1.36528e-05	0.000101066	5.50021e-05	2026	tags=23%	list=13%	signal=21%	5333/22846/5311/113026/8531/8743/9289/5916/56729/6382/558/3586/5660/4846/10046/2057/2316/51738/10388/301/8322/6781/1508/10272/1028/22836/247/5159/10370/6696/5324/1051/9420/677/84159/3643/2099/596/9021/8728/1956/4323/3383/26471/3955/7098/8614/3371/8204/3726/51294/5156/23213/2034/652/6586/5155/1634/2737/9510/7421/4920/6615/6943/5270/3400/4327/80000/3624/8061/7046/5740/9353/3491/5743/5654/5764/3976/…
GO:2000377	GO:2000377	regulation of reactive oxygen species metabolic process	156	-0.421642	-1.8734	1.37941e-05	0.000101925	5.54696e-05	2519	tags=31%	list=16%	signal=27%	384/2771/7124/387/2902/1191/1026/6774/5311/9314/378/683/7442/3586/5873/1535/50507/3684/948/11035/3553/5159/445/3643/113277/199/596/55022/2308/857/1956/64581/80149/7305/3383/90527/1545/947/7099/3689/140885/7048/5155/10365/10516/5740/406994/5743/7057
GO:0042692	GO:0042692	muscle cell differentiation	295	-0.351475	-1.67308	1.44073e-05	0.000105949	5.76595e-05	2969	tags=32%	list=19%	signal=26%	8837/1948/928/488/8536/133/4772/25/9643/57190/5465/55897/9172/23462/9518/2852/10266/91653/975/58529/1756/57538/5738/824/8324/9948/8516/9734/80206/2876/64855/858/3688/6497/55553/6382/825/5997/26585/6722/56603/9750/50507/23345/29767/963/10611/1910/7168/8470/5159/4627/79652/284612/4487/6935/4303/596/4000/6909/7345/4323/6261/2022/84814/4629/64091/5239/8291/5156/652/8038/1465/5155/79365/10938/1311/255…
GO:0044319	GO:0044319	wound healing	spreading of cells	27	-0.683741	-2.16565	1.44177e-05	0.000105949	5.76595e-05	827	tags=37%	list=5%	signal=35%	2316/90102/960/94/1839/10630/1289/407006/3678/3491
GO:0090505	GO:0090505	epiboly involved in wound healing	27	-0.683741	-2.16565	1.44177e-05	0.000105949	5.76595e-05	827	tags=37%	list=5%	signal=35%	2316/90102/960/94/1839/10630/1289/407006/3678/3491
GO:0002763	GO:0002763	positive regulation of myeloid leukocyte differentiation	43	-0.612284	-2.16585	1.45435e-05	0.000106679	5.8057e-05	2434	tags=42%	list=16%	signal=35%	133522/7124/10221/760/3059/2353/920/677/861/1435/146433/1230/7305/972/4920/3725/54209/3976
GO:0050777	GO:0050777	negative regulation of immune response	114	-0.461055	-1.9556	1.49057e-05	0.000109137	5.93945e-05	3173	tags=49%	list=21%	signal=39%	3162/7040/60343/7292/29/197358/90865/51043/9111/10875/10225/5788/384/9655/56833/7124/79132/2896/8764/966/3134/84868/2876/11314/3586/7128/301/284/64092/11221/4067/1604/54625/9173/10859/604/3965/4092/3133/3635/8832/3718/80149/2213/3559/11213/684/84166/3428/710/7043/3077/3566/1281/1378/11326
GO:0071827	GO:0071827	plasma lipoprotein particle organization	33	0.636093	2.06732	1.53474e-05	0.000112167	6.10435e-05	1750	tags=45%	list=11%	signal=40%	213/336/344/4023/183/341/7941/9388/346/335/10347/2181/4018/55937/5326
GO:1901988	GO:1901988	negative regulation of cell cycle phase transition	237	0.366621	1.68864	1.55374e-05	0.00011335	6.16875e-05	905	tags=16%	list=6%	signal=15%	641/891/7272/991/995/9212/701/1869/983/6790/699/144455/2810/63967/990/1111/51512/51514/5347/10403/79733/4998/84101/9319/8091/26271/90381/100126316/4085/54908/1063/2146/81620/11073/8883/23026/7517/138151
GO:0007423	GO:0007423	sensory organ development	407	-0.324706	-1.58284	1.56612e-05	0.000114046	6.20663e-05	2116	tags=22%	list=14%	signal=20%	9481/8516/6774/85407/118427/284217/5797/9314/6497/26018/631/9464/5916/80736/5660/6722/7275/25794/56603/9750/11020/8322/8854/8829/1969/5979/10319/3784/24147/23210/7291/340273/25861/9935/1028/197021/5159/5205/6498/579/4487/26020/4094/1282/10312/6935/596/7431/57381/10848/9839/6909/1956/4814/2200/2487/22899/8013/1545/94235/7070/94/155051/713/6678/115908/1052/5156/652/7048/2737/4237/4920/79633/7043/12…
GO:0002009	GO:0002009	morphogenesis of an epithelium	458	-0.310419	-1.52774	1.64353e-05	0.000119467	6.50167e-05	1976	tags=20%	list=13%	signal=18%	5311/4478/284217/9314/6497/8321/9863/4855/9464/4300/5916/57154/7414/3586/128272/760/2316/6722/9788/4070/8322/8854/8829/1969/5979/5420/64412/9645/5371/54922/7291/2119/2246/388/2247/5699/2239/3082/9420/1512/1282/1522/2099/1435/596/90102/9021/57167/9839/6909/1956/4323/960/2487/2022/4609/5228/3371/23129/94/7424/1839/10252/115908/23213/652/1601/144165/7048/2737/1436/10395/7421/4920/6615/255743/79633/6…
GO:0071230	GO:0071230	cellular response to amino acid stimulus	63	-0.546336	-2.08287	1.66766e-05	0.000121003	6.58524e-05	1056	tags=24%	list=7%	signal=22%	445/1051/1282/6935/1956/1291/1536/5156/80310/1281/1277/1278/1290/1307/4313
GO:0000077	GO:0000077	DNA damage checkpoint	142	0.412326	1.79076	1.69786e-05	0.000122973	6.69245e-05	2689	tags=27%	list=18%	signal=22%	641/891/995/1869/983/6790/144455/2810/63967/1111/51512/51514/5347/79733/8091/146956/83990/4436/79968/5111/595/5810/11200/65975/25896/9984/5591/55159/54465/672/83695/5884/1027/1017/29980/57472/54962/3364
GO:1990868	GO:1990868	response to chemokine	57	-0.56434	-2.13037	1.71052e-05	0.000123445	6.71815e-05	2449	tags=47%	list=16%	signal=40%	2859/387/10519/2920/2829/2826/57007/9034/9750/81704/1240/10019/6091/6347/2921/1230/80149/23143/6351/1843/6586/6348/6349/54209/9353/6387/4015
GO:1990869	GO:1990869	cellular response to chemokine	57	-0.56434	-2.13037	1.71052e-05	0.000123445	6.71815e-05	2449	tags=47%	list=16%	signal=40%	2859/387/10519/2920/2829/2826/57007/9034/9750/81704/1240/10019/6091/6347/2921/1230/80149/23143/6351/1843/6586/6348/6349/54209/9353/6387/4015
GO:0034405	GO:0034405	response to fluid shear stress	33	-0.658293	-2.20821	1.73796e-05	0.000125201	6.81373e-05	2477	tags=67%	list=16%	signal=56%	19/7040/5310/6714/9655/2113/8754/5311/3037/9314/406913/760/4846/9788/5027/5159/10370/445/4092/7043/10365/5743
GO:2000027	GO:2000027	regulation of animal organ morphogenesis	216	-0.378934	-1.74289	1.75137e-05	0.000125942	6.85403e-05	1883	tags=22%	list=12%	signal=20%	8321/9863/9464/4300/57154/128272/26585/7128/4070/8322/7291/2119/5292/2246/5699/10370/2239/3082/55679/4487/6091/2099/1435/596/6909/2022/4609/54829/947/10252/115908/23213/652/1601/144165/7048/55959/7421/4920/6608/7046/7068/10082/860/5764/2252/3976/6423
GO:0034340	GO:0034340	response to type I interferon	79	-0.500686	-2.00536	1.80757e-05	0.000129752	7.06136e-05	3311	tags=49%	list=22%	signal=39%	11277/3661/55337/3716/117854/3659/11274/4615/6773/3394/5696/91543/3654/3134/4939/6041/8519/3106/4940/3430/3437/3663/3105/2537/3107/6672/81844/54739/3434/3433/3133/4938/10410/1958/684/2634/3429/84166/10581
GO:0001937	GO:0001937	negative regulation of endothelial cell proliferation	40	-0.624699	-2.18241	1.81524e-05	0.00013007	7.07871e-05	2418	tags=50%	list=16%	signal=42%	7124/574506/406943/22846/858/5797/406913/4804/51738/28984/2321/6347/857/7857/84913/94/6678/23213/7046/7057
GO:0060389	GO:0060389	pathway-restricted SMAD protein phosphorylation	46	-0.592508	-2.14251	1.83591e-05	0.000131318	7.14659e-05	909	tags=37%	list=6%	signal=35%	26585/6386/4092/11030/2022/406890/353500/94/83891/652/1601/7048/7043/3077/3624/11117/7046
GO:0061458	GO:0061458	reproductive system development	340	-0.341397	-1.63845	1.8518e-05	0.00013222	7.19569e-05	2026	tags=23%	list=13%	signal=21%	5333/22846/5311/113026/8531/8743/9289/5916/56729/6382/558/3586/5660/4846/10046/2057/2316/51738/10388/301/8322/6781/1508/10272/1028/22836/247/5159/10370/6696/5324/1051/9420/677/84159/3643/2099/596/9021/8728/1956/4323/3383/26471/3955/7098/8614/3371/8204/3726/51294/5156/23213/2034/652/6586/5155/1634/2737/9510/7421/4920/6615/6943/5270/3400/4327/80000/3624/8061/7046/5740/9353/3491/5743/5654/5764/3976/…
GO:0055074	GO:0055074	calcium ion homeostasis	332	-0.345138	-1.65743	1.86459e-05	0.000132897	7.23254e-05	3103	tags=34%	list=20%	signal=28%	22821/5310/29887/2946/6263/6786/3777/90550/2280/488/817/133/2053/1234/2587/25/7052/11346/57190/1909/64072/2852/5788/8698/23075/481/2859/728/1756/2902/5581/1903/80024/5336/9481/27202/2829/286530/8996/10367/5311/2826/1902/7442/57007/2905/3356/825/1535/3685/84959/51738/9034/3709/6781/6915/5371/5027/948/1910/2359/4067/1604/2247/9002/1901/10161/53373/920/27/1240/8477/284612/2357/2828/10312/114897/958/…
GO:0042133	GO:0042133	neurotransmitter metabolic process	120	-0.449565	-1.91623	1.87088e-05	0.00013311	7.24413e-05	2155	tags=31%	list=14%	signal=27%	1191/1757/5311/9314/4129/7442/80736/3586/4846/23446/948/3176/3553/5153/445/3643/113277/4128/6542/199/7097/857/64581/80149/3383/1545/947/7099/3689/140885/1806/26002/10365/590/5740/406994/5743
GO:0052547	GO:0052547	regulation of peptidase activity	331	-0.342547	-1.64467	1.88491e-05	0.000133842	7.28398e-05	2418	tags=27%	list=16%	signal=24%	7124/5696/8717/1611/387/2902/721/1612/406943/2896/9966/10550/83595/23151/2876/9647/1992/1471/6774/8996/5973/114769/834/9314/5271/8743/57630/1293/83874/720/5641/4804/2537/64170/8434/5371/2621/58189/6690/4318/4067/56925/4155/114548/3082/1512/3965/6091/718/837/6279/8530/3730/22861/7077/857/64581/64065/960/2335/89932/355/84168/4609/2192/684/51050/871/1475/5918/2934/64115/3428/710/1893/57333/10395/669…
GO:0001893	GO:0001893	maternal placenta development	32	-0.645465	-2.14233	1.88782e-05	0.000133842	7.28398e-05	1633	tags=38%	list=11%	signal=34%	2057/51738/6781/1508/6696/8614/3726/7421/5740/5743/5764/3976
GO:0072006	GO:0072006	nephron development	120	-0.448875	-1.91329	1.98341e-05	0.000140373	7.63937e-05	1841	tags=32%	list=12%	signal=28%	9863/7010/28999/9788/284/4070/5979/2028/5420/64412/5175/2246/2247/5159/2828/285/596/4854/1958/4609/947/5228/4811/5156/23213/652/5155/2737/55959/59/255743/79633/80310/6943/80000/6608/170690/3976
GO:0043547	GO:0043547	positive regulation of GTPase activity	358	-0.336639	-1.6276	2.01963e-05	0.000142685	7.76523e-05	2583	tags=27%	list=17%	signal=23%	8874/57569/57522/6422/57822/1793/54453/8301/6494/25780/116988/7813/2776/153090/129049/391/143872/134957/64407/117289/9732/858/23102/3688/3071/23216/7409/5998/374403/55357/9882/9411/30851/116985/83874/10435/55616/128272/51291/216/5997/10156/392/64411/397/8786/81704/8829/9912/1969/9922/64333/3987/7984/57636/257106/201176/1901/8477/57514/259173/4739/10411/6347/958/100271927/80243/23232/1794/55619/14…
GO:0010721	GO:0010721	negative regulation of cell development	278	-0.356453	-1.68747	2.06975e-05	0.00014597	7.94398e-05	2528	tags=30%	list=17%	signal=26%	182/567/3956/23258/7124/387/3949/10519/26052/10509/1903/5793/81/4882/1809/6774/64218/55198/6497/7025/9289/1902/7442/56920/5997/6405/23111/10769/4804/9037/9572/4070/8829/1840/1910/11221/3553/22891/147040/54413/10631/6696/10859/5744/89927/1522/54437/596/7431/4854/5376/59341/283659/2200/56963/10501/2487/223117/157285/2039/23500/2192/3399/11202/7070/23603/144347/55079/8482/359845/2737/4035/6695/1946/…
GO:0032722	GO:0032722	positive regulation of chemokine production	48	-0.589001	-2.13973	2.10901e-05	0.000148479	8.08053e-05	1323	tags=42%	list=9%	signal=38%	7291/3553/4155/247/10631/9173/3965/199/7097/64581/59341/1958/7098/7099/972/51284/1436/4035/3566/3569
GO:1903036	GO:1903036	positive regulation of response to wounding	57	-0.561456	-2.11948	2.11986e-05	0.000148982	8.10793e-05	2265	tags=49%	list=15%	signal=42%	5581/2896/53905/5467/64094/825/301/6915/948/50506/8613/8578/64581/5341/2039/7099/1839/7056/4638/7048/4035/10630/407006/8840/5054/2152/5764/7057
GO:0006301	GO:0006301	postreplication repair	50	0.567038	2.0229	2.12823e-05	0.00014931	8.12574e-05	3630	tags=52%	list=24%	signal=40%	51514/5983/4436/5984/5427/5985/5111/6119/9768/10459/5424/7336/5982/5425/7334/672/83932/5980/10714/55339/9636/9100/5429/11201/6117/6118
GO:0070838	GO:0070838	divalent metal ion transport	377	-0.33094	-1.60822	2.15221e-05	0.00015073	8.20302e-05	3103	tags=32%	list=20%	signal=26%	22821/5310/2946/100507537/80228/6263/6786/90550/57165/79026/2280/488/817/29763/1234/259232/135/5138/25/57190/93589/64072/3783/2852/10266/5788/7439/7922/9454/10267/2771/481/2859/7349/1756/387/2902/51393/5581/80024/5336/5142/23516/8996/10367/93129/5311/201266/79815/10203/91252/7442/2905/3356/64116/4846/825/1535/3685/84959/84766/3603/3709/8913/6781/5371/5027/2621/6690/4067/2247/9002/2701/53373/5159/…
GO:0046635	GO:0046635	positive regulation of alpha-beta T cell activation	51	-0.562587	-2.07632	2.2702e-05	0.000158717	8.63773e-05	3154	tags=59%	list=21%	signal=47%	8767/7292/10808/4860/51043/5788/9655/975/387/916/3071/9308/84807/54440/3606/3707/301/1604/941/114548/861/3965/942/3133/64926/7048/2737/3566/940/64332
GO:0010596	GO:0010596	negative regulation of endothelial cell migration	52	-0.571261	-2.11701	2.28748e-05	0.000159648	8.68839e-05	2407	tags=42%	list=16%	signal=36%	574506/387/153090/406943/22846/5797/9314/161742/56999/6672/6781/6915/28984/2247/79812/285/94/1634/407006/9353/406994/7057
GO:0006874	GO:0006874	cellular calcium ion homeostasis	325	-0.337246	-1.6112	2.32861e-05	0.000162237	8.8293e-05	3103	tags=34%	list=20%	signal=28%	22821/5310/2946/6263/6786/3777/90550/2280/488/817/133/2053/1234/2587/25/7052/11346/57190/1909/64072/2852/5788/8698/23075/481/2859/728/1756/2902/5581/1903/80024/5336/9481/27202/2829/286530/8996/10367/5311/2826/1902/7442/57007/2905/3356/825/1535/3685/84959/51738/9034/3709/6781/6915/5371/5027/948/1910/2359/4067/1604/2247/9002/1901/10161/53373/920/27/1240/8477/284612/2357/2828/10312/114897/958/302/20…
GO:0071901	GO:0071901	negative regulation of protein serine/threonine kinase activity	127	-0.435836	-1.87128	2.33552e-05	0.000162438	8.84022e-05	2422	tags=32%	list=16%	signal=27%	1850/6609/1848/10519/3315/153090/51422/1026/1847/1849/5998/11314/161742/1845/5997/81848/3087/7128/26191/200734/26524/54922/11221/4067/3553/1028/10019/857/7345/1029/407000/389119/11213/1843/10252/652/57493/1030/5999/1844/6423
GO:0048010	GO:0048010	vascular endothelial growth factor receptor signaling pathway	87	-0.496436	-2.01882	2.3732e-05	0.000164774	8.96733e-05	3143	tags=49%	list=21%	signal=39%	23191/2324/6714/8440/7422/3091/8817/7423/1793/387/9261/3315/8828/153090/4688/64855/3071/7409/10458/558/1535/3685/3087/8322/5587/8829/5829/3553/5295/79652/2321/9564/4689/79812/3690/1536/5228/7424/23213/6461/11117/26509/3678
GO:0032201	GO:0032201	telomere maintenance via semi-conservative replication	27	0.66296	2.07123	2.39421e-05	0.000165666	9.0159e-05	3630	tags=74%	list=24%	signal=57%	2237/5983/5984/5427/5985/5557/5111/6119/5426/23649/5424/5982/5425/1763/5558/10714/5422/54107/6117/6118
GO:0032330	GO:0032330	regulation of chondrocyte differentiation	45	-0.598555	-2.1588	2.39428e-05	0.000165666	9.0159e-05	1812	tags=49%	list=12%	signal=43%	55553/5916/26585/91461/150356/4054/579/5744/4094/302/11173/94/144347/652/359845/2737/4017/1490/7046/2202/8840/860
GO:0006364	GO:0006364	rRNA processing	212	0.376298	1.71866	2.47377e-05	0.000170873	9.29925e-05	6840	tags=61%	list=45%	signal=34%	10799/23212/3669/84135/4839/64965/65008/79863/29960/55759/25926/705/27043/8886/11103/80135/50628/55651/134430/25879/10556/2483/51602/153443/8568/54606/51154/10775/57418/51010/23517/27079/55011/84128/9875/91893/11056/260294/51729/79707/6839/51106/55720/196074/23404/90459/10528/10199/85395/79066/55226/54881/4931/51018/88745/55636/8945/9277/10436/55127/55781/6201/23560/5036/22803/23246/10885/117246/…
GO:0002673	GO:0002673	regulation of acute inflammatory response	33	-0.650483	-2.18201	2.50695e-05	0.000172868	9.40784e-05	1299	tags=39%	list=8%	signal=36%	1910/3553/2207/114548/718/3133/8792/5733/2213/9180/5008/5743/3569
GO:0006816	GO:0006816	calcium ion transport	341	-0.3376	-1.62149	2.53626e-05	0.00017459	9.50155e-05	3103	tags=33%	list=20%	signal=27%	22821/5310/2946/100507537/80228/6263/6786/90550/57165/79026/2280/488/817/29763/1234/259232/135/5138/25/57190/93589/64072/3783/2852/10266/5788/7439/9454/10267/2771/481/2859/7349/1756/387/2902/51393/5581/80024/5336/5142/8996/10367/93129/5311/10203/7442/2905/3356/4846/825/1535/3685/84959/84766/3603/3709/8913/6781/5371/5027/2621/6690/4067/2247/9002/2701/53373/5159/140738/920/10859/6347/10288/302/596/…
GO:0048015	GO:0048015	phosphatidylinositol-mediated signaling	151	-0.41489	-1.83905	2.60773e-05	0.000179204	9.75264e-05	2605	tags=34%	list=17%	signal=29%	22876/2852/59338/5526/7124/387/2260/153090/5336/5467/57605/9314/7010/406913/3356/3606/2057/5724/3059/5293/284/8660/7291/23533/4067/118788/5159/5295/10870/2321/3082/677/3643/113791/80243/1956/55615/375033/219699/5330/2934/5156/5155/1634/1436/80310/5270/940/3480/3479/5008/8870
GO:0072511	GO:0072511	divalent inorganic cation transport	382	-0.331896	-1.61604	2.62169e-05	0.000179856	9.78815e-05	3103	tags=32%	list=20%	signal=26%	22821/5310/2946/100507537/80228/6263/6786/90550/538/57165/79026/2280/488/817/29763/1234/259232/135/5138/25/57190/93589/64072/3783/2852/10266/5788/7439/7922/9454/10267/2771/481/2859/7349/1756/387/2902/51393/5581/80024/5336/5142/23516/8996/10367/93129/5311/30061/201266/79815/10203/91252/7442/2905/3356/64116/4846/825/1535/3685/84959/84766/3603/3709/8913/6781/5371/5027/2621/6690/4067/2247/9002/2701/5…
GO:0022612	GO:0022612	gland morphogenesis	101	-0.466567	-1.93827	2.68909e-05	0.000184099	0.000100191	1536	tags=33%	list=10%	signal=30%	4478/284217/5916/7128/8829/1969/5371/2119/3082/5324/55679/1051/9420/2099/1435/596/857/6909/1956/1896/3371/23129/23213/652/7048/2737/1436/55959/7421/7043/3400/5764/2252
GO:0048143	GO:0048143	astrocyte activation	20	-0.736207	-2.20837	2.69269e-05	0.000184099	0.000100191	2423	tags=70%	list=16%	signal=59%	135/728/7124/3949/2896/25825/9572/3553/1956/4035/712/6608/54209/3569
GO:0045639	GO:0045639	positive regulation of myeloid cell differentiation	73	-0.520296	-2.04134	2.6978e-05	0.000184136	0.000100211	2528	tags=40%	list=17%	signal=33%	182/3303/133522/7124/2113/10221/6774/3071/760/3059/2353/920/6886/6777/677/861/1435/146433/3635/1230/7305/338382/972/4920/3725/3624/407006/54209/3976
GO:0042533	GO:0042533	tumor necrosis factor biosynthetic process	24	-0.702925	-2.19062	2.71273e-05	0.00018453	0.000100425	2479	tags=58%	list=16%	signal=49%	602/9261/3315/3586/51738/64170/10859/64581/7305/7099/1536/7096/54206/7057
GO:0042534	GO:0042534	regulation of tumor necrosis factor biosynthetic process	24	-0.702925	-2.19062	2.71273e-05	0.00018453	0.000100425	2479	tags=58%	list=16%	signal=49%	602/9261/3315/3586/51738/64170/10859/64581/7305/7099/1536/7096/54206/7057
GO:0070482	GO:0070482	response to oxygen levels	349	-0.333017	-1.60267	2.74036e-05	0.000186095	0.000101277	3004	tags=29%	list=20%	signal=24%	210/7422/3777/8837/538/3091/10533/9114/360/51378/64506/133/5698/4929/571/5465/1909/10266/7423/6422/7316/481/5696/387/2113/3654/5581/824/81/5467/1026/863/8996/114769/126374/1902/7010/10397/406913/1535/6722/50507/3709/6513/5351/6781/5371/7291/1803/54541/28984/5699/114990/10631/5159/10370/677/285/596/10135/7097/4000/2308/857/3291/3751/1958/4323/3383/5327/3778/6261/355/84701/4609/947/1536/5228/29923/…
GO:0006026	GO:0006026	aminoglycan catabolic process	51	-0.559127	-2.06354	2.78137e-05	0.000187943	0.000102283	1423	tags=35%	list=9%	signal=32%	6382/3425/2247/2239/3339/176/5549/960/1462/633/6383/2331/1634/1464/4060/10082/57214/10894
GO:0006406	GO:0006406	mRNA export from nucleus	107	0.451207	1.88113	2.78158e-05	0.000187943	0.000102283	6529	tags=67%	list=43%	signal=39%	55706/9688/84321/10212/51692/9631/26993/129401/8480/9984/10189/55110/57122/23225/5433/10762/29118/4927/4686/348995/55339/6428/7307/9939/22916/4116/9887/10921/55677/6426/6427/8106/10250/23511/3181/10898/56943/7175/55746/81929/55795/79023/23381/23279/23636/22794/2733/51362/26097/3267/6431/79902/10569/160419/84324/23049/53981/57187/23165/65109/26019/8086/53371/11097/4928/9972/7884/9295/199746/6430/8…
GO:0071427	GO:0071427	mRNA-containing ribonucleoprotein complex export from nucleus	107	0.451207	1.88113	2.78158e-05	0.000187943	0.000102283	6529	tags=67%	list=43%	signal=39%	55706/9688/84321/10212/51692/9631/26993/129401/8480/9984/10189/55110/57122/23225/5433/10762/29118/4927/4686/348995/55339/6428/7307/9939/22916/4116/9887/10921/55677/6426/6427/8106/10250/23511/3181/10898/56943/7175/55746/81929/55795/79023/23381/23279/23636/22794/2733/51362/26097/3267/6431/79902/10569/160419/84324/23049/53981/57187/23165/65109/26019/8086/53371/11097/4928/9972/7884/9295/199746/6430/8…
GO:0032623	GO:0032623	interleukin-2 production	54	-0.556483	-2.08245	2.83729e-05	0.000191386	0.000104157	2580	tags=61%	list=17%	signal=51%	6711/8767/5074/4860/25/5788/9454/916/89795/5142/84868/919/51564/9308/54440/3606/7128/301/64170/84433/3553/2207/920/941/861/942/64581/6556/947/940/7538/11326/2633
GO:0099024	GO:0099024	plasma membrane invagination	52	-0.567767	-2.10406	2.90731e-05	0.000195782	0.000106549	2482	tags=50%	list=16%	signal=42%	1793/387/51411/55198/3071/11314/9886/4240/286046/3684/948/2207/4627/257364/718/199/4481/112574/2213/3689/11031/2934/51454/54209/2209/7057
GO:0051235	GO:0051235	maintenance of location	268	-0.352959	-1.6728	2.98404e-05	0.000200613	0.000109178	2603	tags=28%	list=17%	signal=24%	2852/5788/1407/602/3098/7124/79068/23568/1756/32/5581/80024/2548/5336/5467/11344/7114/11015/8996/5311/4790/7442/3586/3356/825/2316/1535/3685/84959/4792/5552/2512/3709/6672/5371/5027/23345/948/4067/3553/2247/9002/53373/920/718/6279/4481/857/3690/80149/2200/6261/187/308/57338/29923/7070/623/5330/8204/8291/2934/7226/10938/6348/375387/6280/4681/7220/22873/287/5350/57214/57158/5167/3569
GO:0042742	GO:0042742	defense response to bacterium	123	-0.441779	-1.88213	3.04003e-05	0.000204037	0.000111041	2640	tags=38%	list=17%	signal=32%	3140/4615/3394/384/602/728/56833/7124/1113/7132/2896/8764/114132/84868/64127/23208/6464/5650/3586/1535/1130/64170/1969/5027/948/6039/2207/920/114548/1051/6279/22861/3133/7097/6556/219972/7098/11096/7099/2634/6280/54209/23166/5919/5054/284297/3569
GO:0010950	GO:0010950	positive regulation of endopeptidase activity	147	-0.415257	-1.83504	3.06406e-05	0.000205307	0.000111733	2459	tags=29%	list=16%	signal=25%	8301/7124/8717/1611/387/2902/1612/9966/10550/83595/23151/9647/6774/834/8743/83874/5641/4804/64170/5371/4067/4155/114548/1512/3965/6091/837/6279/22861/64581/64065/355/4609/2934/64115/3428/10395/1490/6280/1378/3491/2152/6423
GO:0002819	GO:0002819	regulation of adaptive immune response	131	-0.436283	-1.8835	3.08533e-05	0.000206389	0.000112321	2580	tags=42%	list=17%	signal=35%	5788/29126/567/9655/7124/975/200558/91543/8764/3134/84868/695/113/7454/3106/84807/54440/3586/3105/3606/7128/301/3107/10673/64092/5027/11221/11035/3553/2207/9173/920/941/114548/10859/604/718/4092/958/8741/3133/23529/3718/6556/80149/8809/7133/2213/3554/3077/3566/940/1378/64332/3569
GO:0014065	GO:0014065	phosphatidylinositol 3-kinase signaling	124	-0.433097	-1.84922	3.10755e-05	0.000207531	0.000112943	1740	tags=29%	list=11%	signal=26%	7010/406913/3356/3606/2057/3059/5293/284/8660/7291/23533/4067/118788/5159/5295/10870/2321/3082/677/3643/113791/80243/1956/55615/375033/219699/5156/5155/1634/80310/5270/940/3480/3479/5008/8870
GO:0050851	GO:0050851	antigen receptor-mediated signaling pathway	212	-0.377582	-1.73394	3.12714e-05	0.000208493	0.000113467	2823	tags=32%	list=18%	signal=26%	5698/1540/25/10603/5970/3783/123920/5788/59338/5583/5696/975/11119/916/5336/1997/974/5142/933/695/7462/3117/919/9473/4790/3071/7454/4340/11314/10384/1845/5063/84807/80381/11118/11006/9402/5293/26191/3120/55824/84433/4067/5699/5295/920/9564/861/2533/3115/3937/596/3635/23180/80149/3113/2213/3127/3119/3122/7070/3123/4332/940/64332/4773/2633
GO:1901224	GO:1901224	positive regulation of NIK/NF-kappaB signaling	69	-0.514119	-2.01134	3.1395e-05	0.000208972	0.000113727	2487	tags=39%	list=16%	signal=33%	10725/7124/8717/387/3654/9966/3611/81/84868/64127/3606/3987/3553/56892/8877/3965/23328/7097/1956/8809/7098/7099/1896/51284/929/54209/4306
GO:1903053	GO:1903053	regulation of extracellular matrix organization	36	-0.630861	-2.17427	3.19828e-05	0.000212533	0.000115665	2353	tags=56%	list=15%	signal=47%	2113/7132/1471/3037/23187/79709/6624/150356/1803/28984/90102/7133/84168/4035/165/2191/4921/10630/11117/3569
GO:1903672	GO:1903672	positive regulation of sprouting angiogenesis	38	-0.60873	-2.09837	3.2419e-05	0.000215076	0.000117049	3173	tags=66%	list=21%	signal=52%	3162/3716/406888/7422/25/4215/574506/10519/9734/51564/9314/3586/406913/10769/51738/301/57608/8829/2246/2247/57381/187/27286/3678/5743
GO:0045638	GO:0045638	negative regulation of myeloid cell differentiation	62	-0.532523	-2.02462	3.30469e-05	0.000218882	0.00011912	1630	tags=42%	list=11%	signal=38%	10519/10221/140685/11025/11006/3707/84959/4792/4067/10272/9935/5295/6886/10859/677/10234/3635/2200/7098/4609/7099/714/6348/3624/7538/4212
GO:0072678	GO:0072678	T cell migration	51	-0.555165	-2.04892	3.47502e-05	0.000229785	0.000125054	2362	tags=39%	list=15%	signal=33%	83692/387/8764/1880/4267/4478/5293/9750/81704/11035/1901/64005/6347/131450/199/3383/23143/1893/6348/6387
GO:1904646	GO:1904646	cellular response to amyloid-beta	36	-0.628282	-2.16538	3.50878e-05	0.000231637	0.000126062	1643	tags=36%	list=11%	signal=32%	5641/4804/23621/948/837/10135/3383/2213/7099/4035/54209/3480/3479
GO:0042036	GO:0042036	negative regulation of cytokine biosynthetic process	27	-0.665427	-2.10764	3.51669e-05	0.000231779	0.000126139	2790	tags=59%	list=18%	signal=49%	9111/5788/602/28951/79589/4790/9314/3586/51738/10859/3635/7305/54206/3624/7538/3569
GO:1904035	GO:1904035	regulation of epithelial cell apoptotic process	64	-0.534713	-2.04614	3.55546e-05	0.000233743	0.000127208	1740	tags=33%	list=11%	signal=29%	7010/406913/9037/7128/284/2621/28984/641700/677/6347/958/7857/3383/26471/2934/7538/5054/6934/6424/7057/3569
GO:0001837	GO:0001837	epithelial to mesenchymal transition	122	-0.431777	-1.84516	3.55809e-05	0.000233743	0.000127208	1323	tags=25%	list=9%	signal=23%	26585/6386/7291/28984/3553/114990/3082/4487/10439/4092/80709/6275/152007/90102/2022/10252/147906/652/1601/359845/7048/6615/4017/7043/10630/1277/7046/407006/6934/3569/6423
GO:0048872	GO:0048872	homeostasis of number of cells	213	-0.375222	-1.72189	3.58782e-05	0.000235312	0.000128062	2520	tags=29%	list=16%	signal=25%	567/3303/1777/2113/84456/8444/83700/1880/5142/6774/51341/30061/3071/55553/558/54440/202309/4846/3988/3707/6722/3059/7128/301/5293/10673/23210/5027/11035/84433/4067/9935/2207/3216/6886/6498/10320/6777/10019/677/604/3965/10312/6688/1435/596/3635/3718/9770/55619/139818/2039/3559/972/2034/652/10365/3624/6608/407006/7538/3569
GO:0030003	GO:0030003	cellular cation homeostasis	482	-0.305073	-1.50794	3.61269e-05	0.000236558	0.00012874	3103	tags=31%	list=20%	signal=25%	22821/5310/57282/2946/23627/6263/6786/9997/3777/90550/538/151176/3091/2280/488/9114/817/133/2053/1234/2587/113235/25/54734/7052/11346/57190/1909/64072/2852/5788/8698/7922/23075/481/2859/728/56833/1756/2902/535/84286/5581/1903/80024/2896/5336/55647/9481/27202/6553/23516/2829/286530/8996/10367/23479/5311/30061/2826/1318/91252/1902/7442/57007/2905/3356/64116/760/825/1535/3685/84959/51738/9034/2512/3…
GO:0006403	GO:0006403	RNA localization	222	0.363204	1.67141	3.774e-05	0.000246719	0.00013427	6568	tags=62%	list=43%	signal=36%	23237/55916/55706/9688/55135/23212/84321/10212/51692/54715/9631/26993/9793/129401/22948/8480/908/9984/10189/6741/8607/7263/55110/57122/7514/23225/55651/5433/57510/10762/5901/10694/7203/29118/1070/4927/4686/51602/348995/54439/55339/51010/55011/10856/10644/6421/167227/6428/6950/7307/9939/22916/23404/4116/65110/9887/64901/10921/55677/6426/2332/6427/54847/8106/10250/1660/51808/23511/10128/3181/10898/…
GO:0033138	GO:0033138	positive regulation of peptidyl-serine phosphorylation	79	-0.49134	-1.96793	3.81929e-05	0.000249275	0.000135661	1793	tags=29%	list=12%	signal=26%	7124/7349/1389/85456/57600/3589/3059/284/5587/5979/2621/10411/596/10268/857/1956/960/10044/5008/5743/3976/3569/6423
GO:0006027	GO:0006027	glycosaminoglycan catabolic process	48	-0.58023	-2.10786	3.87291e-05	0.000252366	0.000137343	1423	tags=38%	list=9%	signal=34%	6382/3425/2247/2239/3339/176/5549/960/1462/633/6383/2331/1634/1464/4060/10082/57214/10894
GO:0045667	GO:0045667	regulation of osteoblast differentiation	103	-0.458564	-1.91434	3.94918e-05	0.00025692	0.000139821	2579	tags=34%	list=17%	signal=28%	100126315/6422/182/25819/7124/3611/10140/8519/51564/6497/9464/9260/26585/5587/7291/3727/23051/3082/1051/10312/9770/3399/115908/1052/652/2737/255743/4921/338773/8840/3479/3491/860/3569/6423
GO:0003416	GO:0003416	endochondral bone growth	34	-0.636299	-2.16357	3.96975e-05	0.000257841	0.000140323	1769	tags=53%	list=12%	signal=47%	5916/1293/6781/302/51435/1291/64856/1292/85301/7048/1893/1311/2121/4921/7373/54796/4148/1303
GO:0043367	GO:0043367	CD4-positive	alpha-beta T cell differentiation	61	-0.540426	-2.05226	3.98558e-05	0.000258453	0.000140656	2479	tags=44%	list=16%	signal=37%	602/9655/91543/10538/1880/6774/64218/3071/9308/57630/84807/54440/3606/301/941/114548/604/861/3965/942/4092/3718/80149/8809/3566/64332/3569
GO:0034142	GO:0034142	toll-like receptor 4 signaling pathway	29	-0.655921	-2.13976	4.10173e-05	0.000265557	0.000144522	2427	tags=62%	list=16%	signal=52%	353376/3654/5581/153090/55198/4792/7128/9572/26191/3684/4067/118788/23643/338382/7099/3689/929/9865
GO:0072202	GO:0072202	cell differentiation involved in metanephros development	20	-0.72912	-2.18711	4.13104e-05	0.000267026	0.000145321	584	tags=35%	list=4%	signal=34%	947/652/5155/79633/6943/6608/3976
GO:0055001	GO:0055001	muscle cell development	133	-0.425753	-1.84407	4.23773e-05	0.000273483	0.000148835	2375	tags=35%	list=16%	signal=29%	58529/1756/57538/9948/9734/80206/2876/64855/858/3688/6497/6382/825/5997/6722/9750/29767/10611/7168/8470/5159/284612/596/4000/7345/6261/2022/4629/5239/8291/5156/652/1465/1311/115701/4621/6608/6444/26509/287/3479/4773/25802/4015/5999/2318
GO:0032611	GO:0032611	interleukin-1 beta production	72	-0.499149	-1.95987	4.27747e-05	0.000275606	0.000149991	2640	tags=46%	list=17%	signal=38%	3140/384/3098/3315/1903/1992/114769/834/64127/51738/7128/5371/5027/948/3553/114548/8877/3965/113277/22861/64581/80149/7305/1958/945/7099/140885/3428/4332/6348/54206/54209/3479
GO:0051893	GO:0051893	regulation of focal adhesion assembly	59	-0.536913	-2.03926	4.46099e-05	0.000286058	0.000155679	2362	tags=51%	list=15%	signal=43%	5747/6548/5728/6714/7422/8861/25/6422/387/23499/9647/1845/7010/79834/8829/3987/22998/90102/4323/2039/7070/23603/94/29984/4035/10395/1946/2824/1307/7057
GO:0090109	GO:0090109	regulation of cell-substrate junction assembly	59	-0.536913	-2.03926	4.46099e-05	0.000286058	0.000155679	2362	tags=51%	list=15%	signal=43%	5747/6548/5728/6714/7422/8861/25/6422/387/23499/9647/1845/7010/79834/8829/3987/22998/90102/4323/2039/7070/23603/94/29984/4035/10395/1946/2824/1307/7057
GO:0150116	GO:0150116	regulation of cell-substrate junction organization	59	-0.536913	-2.03926	4.46099e-05	0.000286058	0.000155679	2362	tags=51%	list=15%	signal=43%	5747/6548/5728/6714/7422/8861/25/6422/387/23499/9647/1845/7010/79834/8829/3987/22998/90102/4323/2039/7070/23603/94/29984/4035/10395/1946/2824/1307/7057
GO:0046636	GO:0046636	negative regulation of alpha-beta T cell activation	29	-0.654037	-2.13361	4.58075e-05	0.00029327	0.000159604	3043	tags=69%	list=20%	signal=55%	7292/51043/135/29126/384/9655/8764/11314/301/10859/604/861/3965/4092/3718/80149/64115/2737/3077/3566
GO:0071825	GO:0071825	protein-lipid complex subunit organization	36	0.61583	2.06049	4.63507e-05	0.000296277	0.00016124	1750	tags=42%	list=11%	signal=37%	213/336/344/4023/183/341/7941/9388/346/335/10347/2181/4018/55937/5326
GO:0035265	GO:0035265	organ growth	152	-0.40712	-1.80645	4.68772e-05	0.000299167	0.000162813	1892	tags=28%	list=12%	signal=25%	80014/8531/84944/5916/1293/54440/5660/5997/26524/6781/10611/26011/5292/2247/1901/8470/5159/5324/302/2099/596/51435/6909/140706/1291/64856/1292/85301/7048/1893/1311/57493/2121/4921/6608/7373/7046/54796/3479/5999/2252/4148/1303
GO:0031123	GO:0031123	RNA 3'-end processing	137	0.404708	1.75074	4.71579e-05	0.000299984	0.000163258	6713	tags=65%	list=44%	signal=37%	891/580/84321/10212/51692/51728/25896/9984/6626/10189/1479/6741/55110/114034/55197/5433/55149/1477/1478/26173/4686/9646/54931/55339/51010/79869/6428/25888/7307/55520/9939/22916/23404/4116/90459/10921/6426/57508/6427/8106/10250/23283/60528/10898/7936/11044/56254/56915/64852/10914/87178/2926/123169/54512/22794/1736/23318/51362/904/26097/6431/10569/55656/84324/5393/81556/53981/3028/22828/57187/65109…
GO:1901991	GO:1901991	negative regulation of mitotic cell cycle phase transition	223	0.362726	1.67055	4.71579e-05	0.000299984	0.000163258	905	tags=16%	list=6%	signal=15%	641/891/7272/991/995/9212/701/1869/983/6790/699/144455/2810/63967/990/51512/5347/10403/79733/4998/84101/9319/8091/26271/90381/4085/54908/1063/2146/81620/11073/8883/23026/7517/138151
GO:0002286	GO:0002286	T cell activation involved in immune response	77	-0.495575	-1.97409	4.72287e-05	0.000299984	0.000163258	2479	tags=42%	list=16%	signal=35%	602/9655/975/3683/10538/1880/84868/6774/64218/84807/3606/5873/301/2207/941/114548/10859/604/3965/942/4092/54518/3718/3109/6556/80149/3383/8809/2213/3566/64332/3569
GO:0060337	GO:0060337	type I interferon signaling pathway	75	-0.505429	-2.00201	4.80957e-05	0.00030453	0.000165732	2704	tags=49%	list=18%	signal=41%	11277/3661/3716/117854/3659/11274/4615/6773/3394/5696/91543/3654/3134/4939/6041/8519/3106/4940/3430/3437/3663/3105/2537/3107/6672/54739/3434/3433/3133/4938/10410/1958/684/2634/3429/84166/10581
GO:0071357	GO:0071357	cellular response to type I interferon	75	-0.505429	-2.00201	4.80957e-05	0.00030453	0.000165732	2704	tags=49%	list=18%	signal=41%	11277/3661/3716/117854/3659/11274/4615/6773/3394/5696/91543/3654/3134/4939/6041/8519/3106/4940/3430/3437/3663/3105/2537/3107/6672/54739/3434/3433/3133/4938/10410/1958/684/2634/3429/84166/10581
GO:0002822	GO:0002822	regulation of adaptive immune response based on somatic recombination of immune receptors built from immunoglobulin superfamily domains	117	-0.450745	-1.91803	4.98934e-05	0.000315417	0.000171657	2580	tags=44%	list=17%	signal=37%	5788/29126/567/9655/7124/975/200558/91543/3134/84868/695/7454/3106/84807/54440/3586/3105/3606/7128/301/3107/10673/5027/11035/3553/2207/9173/920/941/114548/10859/604/718/4092/958/8741/3133/23529/3718/6556/80149/8809/7133/2213/3554/3077/3566/940/1378/64332/3569
GO:0002675	GO:0002675	positive regulation of acute inflammatory response	20	-0.725031	-2.17485	5.02769e-05	0.000317343	0.000172705	1210	tags=50%	list=8%	signal=46%	3553/2207/718/3133/8792/5733/9180/5008/5743/3569
GO:0045453	GO:0045453	bone resorption	50	-0.573025	-2.11674	5.16758e-05	0.000325663	0.000177233	1646	tags=36%	list=11%	signal=32%	760/84959/7128/50507/5027/4054/1901/6696/10312/1200/3635/1956/3690/8792/1513/1436/338773/3569
GO:0042113	GO:0042113	B cell activation	194	-0.380308	-1.72937	5.188e-05	0.000325956	0.000177392	2815	tags=39%	list=18%	signal=32%	148022/1540/25/54537/29760/56262/2067/5788/6422/23075/3956/602/56833/975/200558/10538/5336/1880/974/9452/933/9734/1026/695/7462/51341/196/3688/3071/11314/5452/64127/286410/683/4242/54440/3586/202309/3589/3087/678/7128/5293/1316/10673/8660/64092/112616/84433/4067/5295/677/604/10312/958/8741/596/23529/3635/3718/55619/7305/4323/3955/139818/2213/4066/7099/684/972/4332/940/3624/4773/3569
GO:0043122	GO:0043122	regulation of I-kappaB kinase/NF-kappaB signaling	211	-0.375564	-1.72455	5.18842e-05	0.000325956	0.000177392	3227	tags=37%	list=21%	signal=30%	3661/65018/11214/3162/10333/8767/56957/7188/79155/55223/8837/2280/197358/8878/148022/25/7052/5970/4615/24138/389/4215/3956/80216/353376/7124/11043/8717/5187/387/3654/3315/7132/5581/153090/80833/6398/57449/10346/286343/114769/834/8743/3557/10475/64127/1902/6284/84807/825/2316/10769/7128/9572/284/64170/5587/57161/9020/948/81603/4055/84433/3553/10783/920/3965/113277/6275/958/2099/80149/7098/7099/684…
GO:0044057	GO:0044057	regulation of system process	455	-0.312654	-1.53512	5.29221e-05	0.000331959	0.000180659	2484	tags=27%	list=16%	signal=23%	2771/481/5090/2859/1113/60598/7349/79068/1756/387/2260/2902/7132/6324/85358/10699/3269/2548/143872/5142/4882/8864/8996/9732/3762/9314/57555/11343/10203/9464/10458/56729/7442/4660/3586/3356/5592/4846/2316/1535/5997/5724/6722/51738/50944/3709/8913/3784/6781/6915/9294/2621/26011/1910/23467/3274/3553/7168/2702/54413/1890/57731/3082/114899/8877/10391/114897/4092/199/8530/4634/10398/4000/2308/857/6909/…
GO:0098868	GO:0098868	bone growth	36	-0.617571	-2.12847	5.43391e-05	0.000340317	0.000185208	885	tags=50%	list=6%	signal=47%	5916/1293/6781/302/51435/1291/64856/1292/85301/7048/1893/1311/2121/4921/7373/54796/4148/1303
GO:0014066	GO:0014066	regulation of phosphatidylinositol 3-kinase signaling	106	-0.452175	-1.88557	5.54672e-05	0.000346842	0.000188759	1740	tags=30%	list=11%	signal=27%	7010/406913/3606/2057/3059/5293/284/8660/7291/23533/4067/118788/5159/5295/10870/2321/3082/3643/113791/1956/55615/219699/5156/5155/1634/80310/5270/940/3480/3479/5008/8870
GO:0051492	GO:0051492	regulation of stress fiber assembly	75	-0.502534	-1.99054	5.66731e-05	0.000353834	0.000192564	2570	tags=43%	list=17%	signal=36%	6422/389/51466/387/9647/7454/1902/116985/55616/4070/50507/8829/5829/10174/22998/7984/28984/7168/1901/5295/8477/29109/10411/10391/90102/22899/79822/55160/10395/7043/1490/7046
GO:0045143	GO:0045143	homologous chromosome segregation	41	0.578228	1.98865	5.68148e-05	0.000354169	0.000192746	3517	tags=54%	list=23%	signal=41%	9232/9134/9700/84072/5347/9319/83990/55706/256126/898/644186/147872/284071/285498/150365/9985/2177/23353/4361/10734/100130958/283847
GO:0006979	GO:0006979	response to oxidative stress	396	-0.320317	-1.56172	5.84119e-05	0.000363001	0.000197553	2434	tags=24%	list=16%	signal=21%	133522/7124/22921/7349/2113/116988/3315/1612/824/4688/10550/53905/2876/695/8996/8754/84557/5311/55074/9314/8321/5831/6382/558/3586/5660/6810/4846/1535/7128/2353/301/8309/50507/5587/5829/5371/2878/948/79661/2119/4318/11035/9962/4170/4482/50506/7168/388/253827/5159/3082/8877/5742/4689/199/10628/221/11030/596/51435/2308/1956/55364/80149/4323/8013/1545/2775/493869/7099/1536/1843/140885/8614/9124/761/…
GO:0048754	GO:0048754	branching morphogenesis of an epithelial tube	122	-0.425613	-1.81882	5.84119e-05	0.000363001	0.000197553	1581	tags=29%	list=10%	signal=26%	6722/4070/8829/1969/64412/5371/54922/2119/2246/2247/1512/1282/1522/2099/1435/596/4323/2022/4609/5228/3371/23129/10252/652/7048/2737/7421/255743/79633/6943/80000/6608/170690/9353/6423
GO:0046697	GO:0046697	decidualization	23	-0.681052	-2.11296	5.95004e-05	0.000369196	0.000200924	1633	tags=52%	list=11%	signal=47%	2057/51738/6781/1508/6696/8614/3726/7421/5740/5743/5764/3976
GO:0071900	GO:0071900	regulation of protein serine/threonine kinase activity	448	-0.306063	-1.50063	6.01095e-05	0.000372402	0.000202669	2522	tags=26%	list=16%	signal=23%	4215/7316/8682/9500/2914/728/1850/7124/6609/975/387/2260/3654/1848/9261/10519/3315/153090/51422/10221/28951/3611/1026/9064/8754/5311/1847/23043/197259/5470/1849/5998/11314/64127/1902/161742/1845/5063/6464/3356/5997/29950/81848/3087/51738/7128/26191/3656/8322/50507/5606/5979/200734/26524/5027/9294/54922/9020/29969/11221/23533/221472/4067/2246/7984/28984/3553/1028/2247/2180/5159/22924/2321/3082/568…
GO:1902041	GO:1902041	regulation of extrinsic apoptotic signaling pathway via death domain receptors	49	-0.555785	-2.04507	6.14248e-05	0.000379966	0.000206786	2570	tags=45%	list=17%	signal=37%	6422/8682/8717/2876/8743/6810/4846/7128/6672/467/6498/3082/147138/3383/23017/355/85450/7078/407006/5054/7057/6423
GO:0042092	GO:0042092	type 2 immune response	28	-0.650368	-2.08814	6.3156e-05	0.000390076	0.000212288	3043	tags=71%	list=20%	signal=57%	7292/90865/3620/384/602/9655/975/91543/10538/64127/3586/3606/301/114548/604/942/972/1893/3566/3569
GO:0046850	GO:0046850	regulation of bone remodeling	39	-0.599974	-2.08453	6.35974e-05	0.0003922	0.000213444	1694	tags=41%	list=11%	signal=37%	9066/760/26585/84959/7128/5027/4054/1901/6696/3635/1956/3690/8792/1436/338773/3569
GO:0032677	GO:0032677	regulation of interleukin-8 production	58	-0.53693	-2.03058	6.37062e-05	0.000392271	0.000213482	2621	tags=45%	list=17%	signal=37%	4615/5788/3303/602/7124/27202/7114/9314/64127/3586/301/26191/3553/3965/7097/64581/945/7098/7099/84632/7096/972/51284/929/5054/284297
GO:0002793	GO:0002793	positive regulation of peptide secretion	217	-0.372219	-1.70876	6.4055e-05	0.000393816	0.000214323	3162	tags=36%	list=21%	signal=29%	7040/8767/6453/382/6714/117854/7292/90550/3091/90865/135/79792/25/2746/84818/3783/2852/29126/3098/7124/7349/5581/8764/5467/84868/8754/9501/834/399687/57555/64127/192683/3586/6810/51738/91608/26191/8660/5027/7291/55107/28984/3553/4155/247/10631/9173/23601/114548/114899/3965/199/8447/6279/22861/3133/7097/1956/59341/945/947/7099/7424/7096/1436/4035/6348/7043/929/3077/3566/6343/8862/54209/6934/3479/5…
GO:0051653	GO:0051653	spindle localization	45	0.561477	1.96173	6.52838e-05	0.000400759	0.000218102	1831	tags=31%	list=12%	signal=27%	51203/259266/1058/9700/5347/10403/4085/54908/89958/29899/3993/5080/147872/137886
GO:1990266	GO:1990266	neutrophil migration	75	-0.499558	-1.97876	6.71128e-05	0.00041136	0.000223871	2423	tags=47%	list=16%	signal=39%	728/56833/8729/83700/2920/9948/5142/27202/4267/3071/7409/3557/683/5293/9750/5175/3553/120425/4354/2207/6347/6279/1441/2921/719/3689/6351/3680/8291/972/3554/6348/6349/6280/9353
GO:0051091	GO:0051091	positive regulation of DNA-binding transcription factor activity	221	-0.370602	-1.70382	6.82379e-05	0.00041762	0.000227278	2555	tags=31%	list=17%	signal=26%	5970/4615/5583/5526/3303/7316/7185/133522/7124/11043/8717/3654/10519/107/1191/53840/695/10346/6774/9830/51341/114769/4790/8321/10475/64127/3586/3606/825/266977/6722/3059/92565/3656/8322/5587/948/81603/11035/84433/7984/28984/3553/9208/8613/114548/8877/84159/3965/6279/958/2099/7097/857/3383/8792/338382/8809/7098/11213/7099/1896/3689/4921/6608/8061/6280/3569
GO:0043200	GO:0043200	response to amino acid	100	-0.458611	-1.90128	6.86177e-05	0.000419307	0.000228196	1246	tags=20%	list=8%	signal=18%	4067/2743/445/1051/1282/6935/1956/3383/1291/1536/5156/80310/1281/1490/1277/1278/1290/1307/5764/4313
GO:0032331	GO:0032331	negative regulation of chondrocyte differentiation	20	-0.718357	-2.15483	6.88692e-05	0.000420207	0.000228685	1769	tags=65%	list=12%	signal=58%	5916/26585/150356/4054/579/5744/11173/144347/652/359845/7046/2202/8840
GO:0042476	GO:0042476	odontogenesis	103	-0.451166	-1.88345	7.02372e-05	0.000427905	0.000232875	997	tags=26%	list=7%	signal=25%	4487/10312/1441/1435/2308/64065/54829/2775/947/11096/3399/1896/3371/3912/5156/652/2737/54757/7043/3624/6608/1277/1278/4038/5054/860/5654
GO:0032649	GO:0032649	regulation of interferon-gamma production	73	-0.503497	-1.97543	7.09242e-05	0.000431437	0.000234797	2866	tags=52%	list=19%	signal=43%	90865/25/10225/29126/3394/602/7124/916/5142/84868/3595/558/80381/54440/3586/3606/26191/2621/11035/3553/9173/10859/3965/3115/64581/6556/80149/8809/3113/7098/7099/140885/80380/51284/64115/3554/929/3624
GO:0032637	GO:0032637	interleukin-8 production	62	-0.520719	-1.97974	7.2298e-05	0.000439131	0.000238985	2621	tags=42%	list=17%	signal=35%	4615/5788/3303/602/7124/27202/7114/9314/64127/3586/301/26191/3553/3965/7097/64581/945/7098/7099/84632/7096/972/51284/929/5054/284297
GO:1900047	GO:1900047	negative regulation of hemostasis	39	-0.599147	-2.08166	7.24126e-05	0.000439165	0.000239003	1655	tags=49%	list=11%	signal=44%	5592/4846/84959/10019/114897/302/5327/308/947/7056/5156/710/5155/5328/1311/2191/5270/5054/7057
GO:0035987	GO:0035987	endodermal cell differentiation	41	-0.584927	-2.05259	7.32306e-05	0.000443458	0.000241339	1664	tags=41%	list=11%	signal=37%	1284/3685/4318/3693/4323/2335/1291/3689/3912/3624/1289/3678/1290/1295/4313/1303/1301
GO:0030512	GO:0030512	negative regulation of transforming growth factor beta receptor signaling pathway	67	-0.504024	-1.95222	7.39398e-05	0.000446866	0.000243194	2608	tags=39%	list=17%	signal=32%	283149/3303/7316/2734/7041/51341/858/6497/57154/65997/94031/114990/6498/4092/857/2200/406890/54829/50515/83891/7048/7043/375387/11117/7046/5654
GO:0007283	GO:0007283	spermatogenesis	349	0.321812	1.56467	7.40153e-05	0.000446866	0.000243194	2902	tags=25%	list=19%	signal=20%	891/3833/9232/995/1515/259266/402381/57082/55723/1869/84072/57650/29127/121355/9319/10942/4603/83449/83990/5050/25886/53340/91646/55706/26609/120892/3148/23742/2735/79820/202051/65010/25911/51314/7704/2583/6732/2189/6753/9633/51361/644186/675/3815/51668/116832/6662/136332/100125288/222698/147872/8879/4089/3306/135138/124626/284071/140894/644150/8607/55779/150365/10461/347732/55329/56111/9702/9468…
GO:0033108	GO:0033108	mitochondrial respiratory chain complex assembly	96	0.452052	1.84737	7.5791e-05	0.000456902	0.000248656	6203	tags=62%	list=41%	signal=37%	4541/25813/4701/55572/29078/4729/79072/100303755/4726/29090/4704/55744/57001/90639/7019/4695/4700/4706/116228/4712/4709/4710/617/4707/790955/135154/90871/51241/137682/84300/4728/55967/29796/4715/4718/5018/4724/90624/51287/55471/91942/4696/55101/4711/84275/4725/6341/4702/4716/55863/4722/51079/4720/4698/4719/54949/100131801/6834/28958/493753
GO:1901136	GO:1901136	carbohydrate derivative catabolic process	163	-0.403149	-1.80028	7.70616e-05	0.000463867	0.000252446	2856	tags=34%	list=19%	signal=28%	26270/23417/5138/283927/215/2588/4758/51816/9582/81792/115290/55276/2817/252969/9695/55577/313/9583/5142/1471/5141/5973/79873/4126/200316/6382/5660/56999/3425/79661/2247/1890/7378/2239/170685/3339/176/5143/27350/5136/5549/960/1462/633/6383/80896/1806/4907/2331/1634/1464/4060/10082/57214/10894
GO:0060324	GO:0060324	face development	44	-0.579218	-2.06257	7.77933e-05	0.000467573	0.000254463	1919	tags=34%	list=13%	signal=30%	6497/5916/6722/8854/84159/4487/7122/5156/64651/7043/4621/1277/220/83716/4313
GO:0002285	GO:0002285	lymphocyte activation involved in immune response	139	-0.408779	-1.7817	7.81533e-05	0.000469036	0.00025526	2825	tags=40%	list=18%	signal=33%	51043/25/54537/10875/2067/5788/23075/3956/602/9655/975/201294/200558/3683/10538/5336/1880/3134/9452/84868/6774/64218/84807/4242/3586/3606/202309/5873/301/2207/941/114548/10859/604/3965/942/4092/54518/958/8741/23529/3718/3109/6556/80149/55619/3383/3955/139818/8809/2213/7099/3566/940/64332/3569
GO:0071887	GO:0071887	leukocyte apoptotic process	89	-0.476657	-1.944	7.85973e-05	0.000470999	0.000256328	1821	tags=33%	list=12%	signal=29%	64127/558/84807/3586/3707/3059/1514/301/5293/81704/8660/5027/2621/11035/4067/2207/155038/10859/604/3965/3718/1029/3559/8013/972/652/2737/6387/3569
GO:0046578	GO:0046578	regulation of Ras protein signal transduction	220	-0.361527	-1.66351	7.8843e-05	0.000471769	0.000256747	2256	tags=37%	list=15%	signal=32%	26084/11214/57221/6453/5516/22821/382/10160/64857/56882/29/23550/8878/25/10603/4650/23189/8874/2859/8729/153090/143872/57449/115727/89846/286530/3688/7409/83892/9289/1902/23362/6464/128272/389337/2057/3707/81848/10156/2245/397/9750/8829/9912/9922/8660/54922/9828/221472/4067/7984/9002/10161/5159/27/8477/604/2828/6091/2059/5662/152273/115557/1435/100271927/80243/7077/27128/64926/9459/22899/157285/2…
GO:0045598	GO:0045598	regulation of fat cell differentiation	112	-0.435229	-1.8336	7.97282e-05	0.000476358	0.000259244	2713	tags=35%	list=18%	signal=29%	406/23414/2852/6422/182/25819/252995/7124/79068/1389/28951/7041/5467/3356/678/9572/11221/168455/11007/1240/1051/677/4320/2308/59341/80149/122953/2487/284207/3400/10974/7538/8840/5919/84935/5743/5167/3569/6423
GO:0055002	GO:0055002	striated muscle cell development	122	-0.420409	-1.79658	8.13393e-05	0.000485264	0.000264091	2375	tags=35%	list=16%	signal=30%	58529/1756/57538/9948/9734/80206/2876/64855/858/3688/6497/6382/825/5997/6722/9750/29767/10611/7168/8470/5159/596/4000/7345/6261/4629/5239/8291/5156/652/1465/1311/115701/4621/6608/6444/26509/3479/4773/25802/4015/5999/2318
GO:0051048	GO:0051048	negative regulation of secretion	180	-0.37857	-1.70361	8.17554e-05	0.000487025	0.000265049	2570	tags=32%	list=17%	signal=27%	6422/90007/1407/384/2771/7124/1113/7349/64285/91543/2917/7132/3134/933/27202/9734/7114/1992/114769/11314/23208/4129/3586/3589/51738/5552/7128/114088/301/284/26191/5371/2615/2621/28984/3553/114548/114899/10859/3965/131450/8832/80149/7133/5733/2335/2213/308/947/353500/972/6343/3624/5008/22925/2633/284297/3976
GO:0060393	GO:0060393	regulation of pathway-restricted SMAD protein phosphorylation	43	-0.58257	-2.06074	8.24787e-05	0.000489983	0.000266659	1601	tags=37%	list=10%	signal=33%	26585/6386/4092/11030/2022/406890/353500/94/83891/652/1601/7043/3077/3624/11117/7046
GO:0006873	GO:0006873	cellular ion homeostasis	491	-0.304646	-1.50872	8.24953e-05	0.000489983	0.000266659	3103	tags=31%	list=20%	signal=25%	22821/5310/57282/2946/23627/6263/6786/9997/3777/90550/538/151176/3091/2280/488/9114/817/133/2053/1234/9368/2587/113235/25/54734/7052/11346/57190/1909/64072/2852/5788/8698/7922/23075/481/2859/728/56833/1756/2902/535/84286/5581/1903/80024/2896/5336/55647/9481/27202/6553/23516/2829/286530/8996/10367/23479/5311/30061/2826/1318/91252/1902/7442/57007/2905/3356/64116/760/825/1535/3685/84959/51738/9034/2…
GO:0046637	GO:0046637	regulation of alpha-beta T cell differentiation	51	-0.535905	-1.97784	8.32047e-05	0.000493469	0.000268556	1927	tags=41%	list=13%	signal=36%	3071/9308/57630/84807/54440/3606/3707/301/941/114548/604/861/3965/942/4092/3718/80149/7048/2737/3566/64332
GO:0150063	GO:0150063	visual system development	278	-0.345537	-1.63579	9.05288e-05	0.000536117	0.000291766	2054	tags=23%	list=13%	signal=20%	6774/85407/118427/284217/5797/9314/6497/631/5916/6722/7275/25794/8322/8854/8829/1969/5979/3684/10319/24147/23210/7291/340273/1028/197021/5159/6498/4094/1282/10312/718/6935/596/7431/57381/10848/9839/6909/1956/4814/2200/22899/1545/7070/94/155051/5156/652/7048/2737/4237/1296/712/3725/3624/1289/7046/2202/4212/7068/1290/1295/220/5764
GO:0019882	GO:0019882	antigen processing and presentation	203	-0.371727	-1.69985	9.09951e-05	0.000538087	0.000292838	2823	tags=32%	list=18%	signal=26%	5698/6891/162/10484/10875/64167/10437/55080/3140/567/6396/5696/832/83547/4688/3134/83871/3117/22872/7454/3106/64127/968/3105/5873/5641/1535/3685/1514/3107/8722/3120/1520/948/9871/5699/2207/1512/3115/4689/10288/3133/3693/3108/3109/3111/23180/6556/3383/3113/2213/3127/3119/3122/1536/30835/1636/972/3123/10981/3077/54209/2210/2209/7057
GO:1903428	GO:1903428	positive regulation of reactive oxygen species biosynthetic process	44	-0.574896	-2.04718	9.17073e-05	0.000541503	0.000294698	2418	tags=45%	list=16%	signal=38%	7124/2902/1191/5311/9314/7442/5873/1535/948/3553/445/3643/199/64581/3383/90527/7099/3689/10365/5743
GO:0003205	GO:0003205	cardiac chamber development	146	-0.409182	-1.80686	9.30893e-05	0.000548859	0.000298701	1199	tags=24%	list=8%	signal=22%	8321/9464/7010/4846/6722/8829/7168/2702/10370/6091/4092/11174/4634/55742/10848/57167/6909/140706/2022/23129/652/6586/7048/9510/57493/80000/6608/1363/9249/7046/287/9353/3491/1301/6423
GO:0034599	GO:0034599	cellular response to oxidative stress	265	-0.3456	-1.63445	9.39633e-05	0.000553196	0.000301061	3186	tags=34%	list=21%	signal=28%	65018/3162/10333/5074/6648/6714/132864/10645/8837/538/3091/10533/488/2983/2882/4929/25/140809/406/5970/215/59338/3303/133522/7124/22921/2113/116988/3315/1612/4688/10550/2876/695/8996/84557/5311/55074/9314/8321/5831/558/3586/5660/4846/1535/7128/2353/301/50507/5587/5829/5371/2878/948/2119/4318/11035/4170/4482/7168/388/253827/3082/8877/4689/199/221/596/2308/1956/55364/80149/8013/1545/493869/7099/153…
GO:0008217	GO:0008217	regulation of blood pressure	130	-0.406179	-1.7493	9.41531e-05	0.000553196	0.000301061	2930	tags=39%	list=19%	signal=32%	2982/1889/133/2053/5465/64167/1909/10266/84909/1113/7349/387/89797/10699/143872/4882/5973/1359/7442/4846/1535/5724/91608/2028/6915/6518/2621/1910/66002/7168/2702/10631/5742/10391/1522/10135/3291/6446/947/55328/147/623/94/7424/1636/5155/59/170690/1278/8862/5743
GO:0006029	GO:0006029	proteoglycan metabolic process	79	-0.47825	-1.9155	9.42371e-05	0.000553196	0.000301061	2447	tags=42%	list=16%	signal=35%	3340/81792/2817/8509/5467/54480/113189/29940/56548/9957/7358/9469/79690/3425/51363/22856/79586/133584/176/64131/1462/633/9955/50515/23213/1634/55959/1464/2134/10090/6934/3479/1301
GO:0031145	GO:0031145	anaphase-promoting complex-dependent catabolic process	78	0.479614	1.88985	9.58286e-05	0.00056172	0.0003057	621	tags=15%	list=4%	signal=15%	891/11065/991/9232/9212/701/983/6790/5347/26271/4085/27338
GO:1903670	GO:1903670	regulation of sprouting angiogenesis	71	-0.504492	-1.9683	9.59822e-05	0.000561803	0.000305745	2522	tags=51%	list=16%	signal=43%	3162/3716/406888/7422/54567/25/4215/574506/387/10519/9734/51564/9314/161742/3586/406913/10769/4804/51738/301/56999/57608/8829/6915/2246/2247/79812/57381/187/27286/90993/10365/407006/3678/5743/7057
GO:0043406	GO:0043406	positive regulation of MAP kinase activity	223	-0.356437	-1.64111	9.68002e-05	0.000565768	0.000307903	2677	tags=32%	list=17%	signal=27%	8817/200958/9518/5788/4215/7316/8682/9500/2914/728/7124/975/2260/3654/1848/9261/153090/3611/9064/8754/1847/23043/197259/1849/64127/1902/5063/6464/3356/51738/3656/8322/50507/5606/5979/5027/9294/9020/29969/23533/221472/2246/7984/3553/2247/5159/2321/3082/2357/3643/6091/23328/958/9839/7039/1956/8792/7099/972/8325/652/5155/1326/1464/4920/7043/80310/7046/3479/4616/7057
GO:0046718	GO:0046718	viral entry into host cell	106	-0.443384	-1.84891	9.71745e-05	0.000567133	0.000308646	2516	tags=38%	list=16%	signal=32%	3956/3303/11043/975/3949/8764/8519/858/3688/4340/10475/558/3356/3685/1969/6404/1508/2621/81603/1803/1604/23601/920/941/6510/3965/942/3693/857/1956/3690/10410/3383/30835/2934/972/10581/3678/1378/4360
GO:0048871	GO:0048871	multicellular organismal homeostasis	372	-0.320619	-1.55507	9.83527e-05	0.000572612	0.000311628	2092	tags=23%	list=14%	signal=21%	8864/2876/79705/6774/55198/113/30061/3037/64127/7442/54440/3356/3606/760/4846/3988/216/84959/196883/6722/7275/7030/5334/51738/7128/56603/9572/50507/5027/948/4858/1910/4054/66002/25861/3910/3553/4155/58476/1901/2180/6696/1240/1051/1512/10312/1200/1435/596/8029/10848/3635/2308/64641/857/50486/1956/3690/59341/6556/1958/8792/8809/5733/8013/947/9079/11096/7099/353500/284207/7226/1513/115/2034/57333/14…
GO:0007276	GO:0007276	gamete generation	476	0.291723	1.4632	9.83977e-05	0.000572612	0.000311628	2587	tags=22%	list=17%	signal=19%	891/7272/3833/7153/9232/995/81930/1515/259266/23397/402381/57082/55723/1869/3248/6790/84072/57650/54852/29127/5347/121355/658/64180/1525/9319/26271/10942/4603/140690/83449/83990/5050/63979/25886/4880/53340/91646/55706/4436/26609/2175/120892/3148/23742/2735/79820/268/202051/65010/25911/51314/7704/2583/6732/84515/2189/6753/347688/9633/51361/644186/675/2176/3815/51668/116832/6662/84930/136332/100125…
GO:0035924	GO:0035924	cellular response to vascular endothelial growth factor stimulus	53	-0.540555	-2.02025	0.000100927	0.000586486	0.000319178	3101	tags=57%	list=20%	signal=45%	2324/7422/54567/967/5970/10266/7423/81792/9261/3315/8828/153090/64094/301/57608/5587/5606/8829/5159/2321/8877/6091/3164/1960/25960/5228/7424/5156/1634/2619
GO:0060135	GO:0060135	maternal process involved in female pregnancy	52	-0.546421	-2.02495	0.000101944	0.00059004	0.000321112	2128	tags=37%	list=14%	signal=32%	5467/84868/113/2057/5997/51738/6781/1508/6696/3965/285/2099/8614/3726/7421/5740/5743/5764/3976
GO:0045860	GO:0045860	positive regulation of protein kinase activity	457	-0.300217	-1.47586	0.000102041	0.00059004	0.000321112	2522	tags=25%	list=16%	signal=22%	4215/7316/8682/9500/2914/728/7124/975/7349/387/2260/3654/1848/9261/10519/646643/153090/51422/107/9966/3611/1191/1026/9064/113/8754/5311/1847/23043/3071/197259/1849/11314/64127/1902/5063/6464/3356/3606/6793/26585/196883/51738/284/3656/8322/50507/5606/5979/5027/9294/2621/9020/29969/11035/23533/221472/2246/7984/28984/3553/2247/2180/5159/920/22924/6886/2321/3082/56892/4739/2357/3643/6091/23328/958/39…
GO:0014068	GO:0014068	positive regulation of phosphatidylinositol 3-kinase signaling	73	-0.498005	-1.95389	0.000102061	0.00059004	0.000321112	1740	tags=37%	list=11%	signal=33%	7010/406913/3606/2057/3059/5293/284/8660/23533/4067/118788/5159/5295/10870/2321/3082/3643/55615/219699/5156/5155/1634/80310/940/3480/3479/5008
GO:0002703	GO:0002703	regulation of leukocyte mediated immunity	158	-0.398684	-1.76759	0.000102125	0.00059004	0.000321112	2418	tags=34%	list=16%	signal=29%	7124/975/201294/200558/91543/3134/84868/695/7454/7409/11314/3106/64127/54440/3586/6810/3105/3606/5724/3107/3684/5027/11035/30817/4067/3553/2207/114548/10859/604/3965/718/4092/958/8741/3133/23529/8832/3718/7305/3383/8809/7133/2213/7098/7099/684/3689/3554/3077/3566/940/1378/3569
GO:0051591	GO:0051591	response to cAMP	83	-0.474064	-1.92687	0.000103619	0.000597814	0.000325343	1984	tags=36%	list=13%	signal=32%	133522/5187/53905/196/5311/7299/7010/6382/5724/2353/50507/3709/3784/6781/50506/3727/445/677/10411/2039/5322/1843/3726/7056/6678/3725/4327/8061/2354/1277
GO:0071496	GO:0071496	cellular response to external stimulus	303	-0.335374	-1.59758	0.000104272	0.000600723	0.000326926	1755	tags=19%	list=11%	signal=18%	10458/7442/968/558/9531/1535/6722/2353/9750/5587/6513/467/5027/2621/9020/4055/5292/4067/3553/1265/10631/22927/7378/79567/55062/199/958/9780/596/10135/2308/1956/55364/80149/3383/2022/220441/7098/355/25959/7099/1536/23710/3371/29103/51284/3428/3759/7421/63895/3725/3077/8061/1277/1030/5743/5764/2350/6423
GO:0032609	GO:0032609	interferon-gamma production	82	-0.476802	-1.92792	0.000105068	0.000604443	0.000328951	2563	tags=50%	list=17%	signal=42%	90865/25/10225/29126/3394/602/7124/11119/916/5142/84868/3595/558/80381/11118/54440/3586/3606/26191/2621/11035/3553/9173/10859/3965/10312/3115/64581/6556/80149/8809/3113/7098/7099/140885/80380/51284/64115/3554/929/3624
GO:0048662	GO:0048662	negative regulation of smooth muscle cell proliferation	46	-0.560263	-2.02591	0.000106035	0.000608968	0.000331413	3330	tags=52%	list=22%	signal=41%	27250/5728/3162/6648/1312/2852/100126315/574506/10221/3611/5467/1026/9314/3586/5592/7128/7168/3486/199/693223/5739/7043/8862/1264
GO:0046605	GO:0046605	regulation of centrosome cycle	55	0.522197	1.88908	0.000106157	0.000608968	0.000331413	2536	tags=36%	list=17%	signal=30%	6790/1111/3832/6491/10733/25886/899/64793/4751/7517/9475/85459/137886/5902/7514/348654/672/55835/4591/79959
GO:0051480	GO:0051480	regulation of cytosolic calcium ion concentration	246	-0.354405	-1.65263	0.000106674	0.000611061	0.000332552	2934	tags=36%	list=19%	signal=30%	2280/817/133/1234/2587/25/7052/11346/57190/1909/64072/2852/5788/8698/23075/2859/728/1756/2902/5581/1903/80024/5336/27202/2829/286530/8996/5311/2826/1902/7442/57007/2905/3356/825/1535/3685/84959/51738/9034/3709/6915/5371/5027/948/1910/2359/4067/1604/2247/9002/1901/10161/53373/920/27/1240/8477/2357/2828/114897/302/2099/596/10268/857/59341/1230/5739/6261/187/5733/2769/719/57338/147/7070/623/5330/722…
GO:0051496	GO:0051496	positive regulation of stress fiber assembly	49	-0.54684	-2.01215	0.000107054	0.000612365	0.000333262	2570	tags=47%	list=17%	signal=39%	25/6422/389/51466/387/9647/1902/50507/8829/5829/10174/22998/7984/28984/7168/8477/29109/10411/22899/55160/7043/1490/7046
GO:1905476	GO:1905476	negative regulation of protein localization to membrane	26	-0.654164	-2.08313	0.000109067	0.000622996	0.000339048	1570	tags=27%	list=10%	signal=24%	91461/23433/55022/2039/1601/2633/131578
GO:0097711	GO:0097711	ciliary basal body-plasma membrane docking	95	0.444916	1.81743	0.000109544	0.000624833	0.000340047	5276	tags=54%	list=34%	signal=35%	983/5347/347240/10733/4751/22995/10383/55722/84131/121441/9793/27077/9738/55142/7283/54801/9702/93323/79598/115106/55835/7531/79959/11116/79441/261734/55125/203068/80776/54903/22981/9662/80321/26005/1781/55755/23354/22994/51134/80184/117177/11190/5116/10382/10806/1639/132320/5048/8766/9814/84902
GO:0040001	GO:0040001	establishment of mitotic spindle localization	31	0.617523	1.98678	0.000109717	0.00062494	0.000340105	694	tags=29%	list=5%	signal=28%	51203/1058/9700/5347/10403/4085/54908/89958/29899
GO:1905517	GO:1905517	macrophage migration	41	-0.57633	-2.02242	0.000114746	0.000652661	0.000355192	1402	tags=37%	list=9%	signal=33%	79148/1910/1240/6347/131450/1435/59341/4323/719/4920/6348/11117/54209/5919/7057
GO:0061138	GO:0061138	morphogenesis of a branching epithelium	150	-0.396974	-1.75942	0.000115206	0.000654352	0.000356112	1671	tags=27%	list=11%	signal=24%	3586/6722/4070/8829/1969/64412/5371/54922/2119/2246/2247/3082/1512/1282/1522/2099/1435/596/9021/4323/2022/4609/5228/3371/23129/10252/23213/652/7048/2737/7421/255743/79633/6943/80000/6608/170690/9353/2252/6423
GO:0030195	GO:0030195	negative regulation of blood coagulation	38	-0.585921	-2.01974	0.000117053	0.000663904	0.000361311	1655	tags=47%	list=11%	signal=42%	5592/4846/84959/10019/114897/302/5327/308/947/7056/5156/710/5155/5328/2191/5270/5054/7057
GO:0051928	GO:0051928	positive regulation of calcium ion transport	95	-0.454635	-1.87368	0.000117636	0.000666276	0.000362601	1637	tags=26%	list=11%	signal=24%	825/84766/6781/5027/9002/5159/920/6347/302/10268/857/1230/187/6351/7070/623/4638/5155/10008/6348/7220/287/57214/57158/6387
GO:0090100	GO:0090100	positive regulation of transmembrane receptor protein serine/threonine kinase signaling pathway	78	-0.486656	-1.93819	0.000118793	0.000671879	0.000365651	1201	tags=24%	list=8%	signal=23%	1028/10370/4487/11030/2022/1003/353500/94/23213/652/1601/255743/7043/3077/3624/1030/7046/3491/7057
GO:1904705	GO:1904705	regulation of vascular smooth muscle cell proliferation	59	-0.519457	-1.97296	0.000120951	0.000681609	0.000370946	2723	tags=42%	list=18%	signal=35%	26119/2852/100126315/2771/7124/574506/406919/4209/1026/3586/5592/4318/7168/2247/693223/8013/5155/9510/7043/3725/407006/8862/3479/1264/4313
GO:1990874	GO:1990874	vascular smooth muscle cell proliferation	59	-0.519457	-1.97296	0.000120951	0.000681609	0.000370946	2723	tags=42%	list=18%	signal=35%	26119/2852/100126315/2771/7124/574506/406919/4209/1026/3586/5592/4318/7168/2247/693223/8013/5155/9510/7043/3725/407006/8862/3479/1264/4313
GO:0030510	GO:0030510	regulation of BMP signaling pathway	71	-0.500004	-1.95079	0.000121021	0.000681609	0.000370946	2173	tags=35%	list=14%	signal=30%	3611/10140/64388/6497/8321/57154/26585/23111/94031/10272/6498/4487/11167/4092/2200/2022/1003/94/23213/652/4681/3491/5654/6424/6423
GO:0002440	GO:0002440	production of molecular mediator of immune response	167	-0.387979	-1.73372	0.000121604	0.000683939	0.000372214	2815	tags=41%	list=18%	signal=34%	148022/54537/10875/10225/3140/2067/5788/23075/567/3098/7124/1113/975/200558/91543/10538/8764/3134/9452/933/695/115004/5452/64127/54440/5650/3586/6810/3606/202309/284/10673/2621/948/84433/1604/3553/2207/114548/10859/604/10312/4092/958/8741/3133/23529/7097/3718/6556/8809/7133/2213/7098/8013/3119/11213/7099/684/8482/972/3554/7043/3077/3566/940/9865/3569
GO:0090303	GO:0090303	positive regulation of wound healing	48	-0.56012	-2.03481	0.000124422	0.00069881	0.000380307	1649	tags=50%	list=11%	signal=45%	5581/53905/5467/64094/825/301/6915/948/50506/8613/64581/5341/2039/7099/1839/7056/4638/7048/10630/407006/8840/5054/2152/7057
GO:0042226	GO:0042226	interleukin-6 biosynthetic process	23	-0.667525	-2.07099	0.00012476	0.000699567	0.000380719	2418	tags=52%	list=16%	signal=44%	7124/6774/5724/51738/64170/3553/1051/3635/64581/7305/7096/972
GO:2001252	GO:2001252	positive regulation of chromosome organization	165	0.376372	1.67835	0.000124904	0.000699567	0.000380719	4402	tags=42%	list=29%	signal=30%	891/9787/9212/9700/5588/5570/3670/2237/4674/4751/120892/81620/10891/1789/84250/1663/4842/2625/26147/26993/3720/22948/908/4089/2966/7334/5885/9252/672/10694/10155/7203/9646/94104/548593/6871/55011/10856/1786/6421/55183/79008/4361/84464/6950/4602/8726/22976/23028/4683/80312/2332/3981/3181/7157/7013/7936/9869/51535/56254/8452/225689/10576/10574/10575/57343/7520/25836/7175
GO:0010718	GO:0010718	positive regulation of epithelial to mesenchymal transition	45	-0.568904	-2.05186	0.000125224	0.000700386	0.000381165	1323	tags=42%	list=9%	signal=39%	6386/7291/28984/3553/10439/152007/2022/652/1601/7048/6615/4017/7043/10630/1277/7046/407006/6934/3569
GO:0085029	GO:0085029	extracellular matrix assembly	37	-0.598152	-2.05814	0.000126689	0.000707597	0.000385089	2172	tags=57%	list=14%	signal=49%	10266/3913/3914/5768/8985/3037/23187/3038/30008/2621/28984/90102/4629/84168/3912/11117/1278/10516/2824/4015/4239
GO:0036293	GO:0036293	response to decreased oxygen levels	328	-0.327121	-1.56556	0.000126936	0.000707993	0.000385305	1740	tags=18%	list=11%	signal=17%	7010/10397/406913/1535/6722/50507/3709/6513/5351/6781/5371/7291/1803/54541/28984/5699/114990/10631/10370/677/285/596/10135/7097/4000/857/3291/3751/1958/4323/3383/5327/3778/6261/84701/4609/947/1536/5228/29923/8614/94/9124/7424/2034/5352/7048/114757/5328/6649/4017/7043/1263/1490/5740/5743/6387/5764/7057/4313
GO:1904407	GO:1904407	positive regulation of nitric oxide metabolic process	35	-0.604417	-2.08315	0.000130657	0.00072774	0.000396052	2418	tags=49%	list=16%	signal=41%	7124/1191/5311/9314/7442/948/3553/445/3643/113277/199/64581/3383/7099/3689/10365/5743
GO:0006112	GO:0006112	energy reserve metabolic process	70	-0.493401	-1.92983	0.000131341	0.000729874	0.000397213	2382	tags=33%	list=16%	signal=28%	55276/51422/8987/2548/8864/2632/648791/9572/8660/5509/5836/3643/79660/8908/55022/4609/8445/80183/51294/10580/9945/3479/5167
GO:0051047	GO:0051047	positive regulation of secretion	329	-0.323482	-1.54853	0.000131403	0.000729874	0.000397213	2192	tags=24%	list=14%	signal=21%	8764/134957/3134/5467/84868/8618/8754/9501/834/399687/57555/64127/56729/7442/6382/192683/9066/3586/6810/5873/1535/5724/6386/51738/91608/26191/3684/8913/8660/5027/7291/1910/55107/28984/6529/3553/4155/247/2207/10631/9173/23601/6696/114548/114899/3965/114897/199/8447/6279/22861/3133/7097/1956/59341/8792/945/947/7099/3689/7424/7096/1436/4035/6348/7043/929/3077/3566/6343/54843/3624/8862/54209/6934/347…
GO:0071260	GO:0071260	cellular response to mechanical stimulus	72	-0.48028	-1.88579	0.0001355	0.000751597	0.000409035	2274	tags=35%	list=15%	signal=30%	7132/441027/4790/834/9531/1535/9750/6513/9020/4055/3553/1265/22927/958/9780/1956/2022/7098/355/7099/51284/3759/63895/1277/5743
GO:0060325	GO:0060325	face morphogenesis	29	-0.629265	-2.0528	0.000136667	0.000757028	0.000411991	1003	tags=34%	list=7%	signal=32%	84159/4487/7122/5156/64651/7043/4621/1277/83716/4313
GO:0002825	GO:0002825	regulation of T-helper 1 type immune response	21	-0.683342	-2.05911	0.000140394	0.000776603	0.000422644	3154	tags=71%	list=21%	signal=57%	8767/7292/90865/9655/84868/3606/301/3553/9173/941/3718/6556/8809/3554/3566
GO:0051146	GO:0051146	striated muscle cell differentiation	219	-0.358431	-1.64608	0.00014077	0.000777612	0.000423193	2406	tags=28%	list=16%	signal=24%	975/58529/1756/57538/5738/824/8324/9948/9734/80206/2876/64855/858/3688/6497/55553/6382/825/5997/26585/6722/56603/9750/50507/29767/963/10611/7168/8470/5159/4627/4487/596/4000/7345/4323/6261/84814/4629/64091/5239/8291/5156/652/8038/1465/79365/10938/1311/115701/3566/4621/6608/6444/26509/338773/3479/4773/25802/4015/5999/2318
GO:0090101	GO:0090101	negative regulation of transmembrane receptor protein serine/threonine kinase signaling pathway	103	-0.4391	-1.83308	0.000141168	0.000778731	0.000423802	2608	tags=36%	list=17%	signal=30%	283149/6422/3303/7316/2734/7041/10140/51341/858/64388/6497/8321/9863/57154/26585/23111/65997/94031/10272/114990/6498/4092/857/2200/406890/54829/50515/83891/7048/7043/375387/4681/11117/7046/8483/5654/6423
GO:0007009	GO:0007009	plasma membrane organization	91	-0.453583	-1.85105	0.000141359	0.000778731	0.000423802	3329	tags=45%	list=22%	signal=35%	745/5728/55909/9885/196527/6711/57047/30846/488/29763/23207/215/57048/5788/727910/1191/51411/858/23208/10458/9066/10397/5660/286046/9788/5027/93099/4627/257364/284612/5359/857/23136/8291/57088/2934/8436/79633/1289/26509/287
GO:0022617	GO:0022617	extracellular matrix disassembly	65	-0.505269	-1.93986	0.00014192	0.000780756	0.000424904	1716	tags=37%	list=11%	signal=33%	6624/5650/1514/1520/7177/4318/1803/4320/649/7077/4323/960/11096/1513/9507/4035/2191/4312/4327/4921/10630/5654/4313/3569
GO:0034109	GO:0034109	homotypic cell-cell adhesion	68	-0.497305	-1.94535	0.000142762	0.000784315	0.000426841	1690	tags=43%	list=11%	signal=38%	83692/3956/3315/3611/4267/7414/5592/2316/84959/7094/10077/2621/83706/4067/8613/4627/10019/114897/10398/3690/5341/140706/375033/2039/5156/1465/1311/5270/10630
GO:0002456	GO:0002456	T cell mediated immunity	80	-0.472519	-1.89944	0.00014531	0.000797225	0.000433867	2580	tags=42%	list=17%	signal=36%	5788/182/567/975/91543/3134/7454/3106/10384/11118/54440/3105/3606/5873/3107/5027/11035/1604/3553/64005/114548/10859/1512/4092/3133/23180/6556/3383/8809/7133/2213/3554/3077/3569
GO:0019985	GO:0019985	translesion synthesis	40	0.56594	1.93338	0.000145927	0.000798497	0.000434559	3630	tags=52%	list=24%	signal=40%	51514/5983/5984/5427/5985/5111/6119/9768/10459/5424/5982/5425/83932/5980/10714/9636/9100/5429/11201/6117/6118
GO:0097696	GO:0097696	receptor signaling pathway via STAT	102	-0.43526	-1.81356	0.000145938	0.000798497	0.000434559	2790	tags=40%	list=18%	signal=33%	9111/6775/1489/3588/22876/5788/6773/602/9655/7124/23568/7132/6774/5311/11314/4249/3586/3606/83666/3059/3587/5979/5175/4067/54625/6777/10019/6347/958/23529/9021/3718/857/6776/1545/1436/407006/3479/5008/3976/3569
GO:0002699	GO:0002699	positive regulation of immune effector process	167	-0.385626	-1.7232	0.000146606	0.000801063	0.000435956	2580	tags=35%	list=17%	signal=29%	5788/567/9655/3098/7124/975/201294/79132/91543/8764/3134/695/55198/399687/7409/11314/3106/64127/84807/54440/5650/6810/3105/3606/5724/301/3107/3684/5027/948/30817/4067/3553/2207/941/114548/10859/3965/942/718/958/8741/3133/23529/8832/3109/7305/8809/8013/7099/3689/8482/972/3554/3566/940/64332/3569
GO:0032663	GO:0032663	regulation of interleukin-2 production	46	-0.552935	-1.99941	0.000149059	0.000813361	0.000442649	2580	tags=52%	list=17%	signal=44%	5788/9454/916/89795/5142/84868/51564/9308/54440/7128/301/64170/84433/3553/920/941/861/942/64581/947/940/7538/11326/2633
GO:0051052	GO:0051052	regulation of DNA metabolic process	314	0.319389	1.5327	0.000150748	0.000821465	0.000447059	4280	tags=39%	list=28%	signal=29%	641/9212/10635/79000/5588/2305/1111/5570/3838/8091/7037/2264/10721/90381/5983/79915/80119/57103/79075/63979/54069/4880/5888/112441434/116028/4751/4436/285051/8914/5984/81620/55135/10891/63922/2956/5985/5582/84250/2187/5111/55010/1663/2625/8313/10459/219736/7398/22948/7468/908/7644/1054/9984/10715/7336/10189/5982/5591/7334/1161/10419/306/672/10694/23347/10155/7203/317/84083/142/1017/548593/64110/5…
GO:0097581	GO:0097581	lamellipodium organization	73	-0.491511	-1.92841	0.00015182	0.000826188	0.000449629	3272	tags=42%	list=21%	signal=34%	55909/2017/23191/6714/8440/538/146206/23189/8874/10109/832/11344/3688/7454/6624/7414/3983/1969/5365/1901/5168/10810/9459/960/2039/1012/23603/29984/50649/10630/9353
GO:0045123	GO:0045123	cellular extravasation	53	-0.532451	-1.98996	0.000154974	0.000842215	0.000458351	2080	tags=40%	list=14%	signal=34%	4267/3688/2650/683/5724/5293/9750/6404/5175/6402/11035/120425/6347/83483/3383/3689/140885/7070/3554/80310/6387
GO:0060976	GO:0060976	coronary vasculature development	45	-0.566306	-2.04249	0.000158616	0.000860847	0.000468491	1799	tags=36%	list=12%	signal=31%	55897/2852/7423/9464/161742/6722/8829/5159/11174/187/23129/652/144165/6444/7046/8862
GO:0060537	GO:0060537	muscle tissue development	309	-0.331654	-1.57991	0.000163106	0.000884021	0.000481103	2731	tags=30%	list=18%	signal=26%	57190/130497/51676/5465/406/55897/23414/9172/283149/4534/26508/1144/3131/58529/387/2817/2260/57538/8324/8516/9734/4209/80206/2876/64855/858/5311/6840/3688/6497/8531/7832/55553/5997/26585/6722/2353/56603/56999/9750/50507/8854/467/7291/10611/26011/5292/7168/2702/2247/1901/8470/5159/10791/4092/4634/596/59269/10848/4000/857/6909/1958/140706/6261/26471/2022/4629/10052/64091/5239/9242/4638/23764/5156/6…
GO:0042108	GO:0042108	positive regulation of cytokine biosynthetic process	55	-0.512399	-1.92628	0.000163841	0.000886382	0.000482388	2884	tags=53%	list=19%	signal=43%	3659/148022/5970/5788/602/7124/9261/916/3315/6774/80381/5724/84433/3553/920/941/942/64581/7305/1958/7098/7099/1536/7096/972/51284/940/7057/3569
GO:0006949	GO:0006949	syncytium formation	44	-0.561627	-1.99993	0.000163982	0.000886382	0.000482388	3138	tags=55%	list=21%	signal=43%	30846/2323/8837/928/8536/9518/2067/22904/975/5738/824/8754/9750/963/4627/10411/9644/7305/8038/10938/3566/26509/54209/4773
GO:0032612	GO:0032612	interleukin-1 production	82	-0.471631	-1.90701	0.00016479	0.000889556	0.000484115	2519	tags=45%	list=16%	signal=38%	384/3098/3315/1903/84868/1992/114769/834/64127/6284/3586/51738/7128/301/5371/5027/2621/948/3553/114548/8877/3965/113277/22861/64581/80149/7305/1958/945/7099/140885/3428/4332/6348/54206/54209/3479
GO:0051092	GO:0051092	positive regulation of NF-kappaB transcription factor activity	137	-0.40338	-1.74931	0.000165413	0.000891722	0.000485294	3169	tags=41%	list=21%	signal=33%	10333/7040/8767/7188/55223/8837/79092/148022/5970/4615/5583/3303/7316/7185/7124/11043/8717/3654/10519/1191/695/10346/6774/9830/51341/114769/4790/10475/64127/3606/825/3656/5587/948/81603/11035/84433/3553/9208/114548/8877/3965/6279/958/7097/857/3383/8792/338382/8809/7098/11213/7099/1896/3689/6280
GO:0010171	GO:0010171	body morphogenesis	44	-0.56072	-1.9967	0.000169066	0.000910201	0.000495351	1936	tags=34%	list=13%	signal=30%	64388/6497/23187/23528/84159/4487/7122/90102/5156/64651/7043/4621/1277/83716/4313
GO:0001666	GO:0001666	response to hypoxia	317	-0.323388	-1.5469	0.000169925	0.0009136	0.000497201	1740	tags=28%	list=11%	signal=26%	210/7422/3777/8837/538/3091/360/51378/64506/133/5698/4929/571/5465/1909/10266/7423/6422/7316/481/5696/387/2113/3654/5581/824/81/5467/863/8996/114769/126374/7010/10397/406913/1535/6722/50507/3709/6513/5351/6781/5371/7291/1803/54541/28984/5699/114990/10631/10370/677/285/596/7097/4000/857/3291/3751/1958/4323/3383/5327/3778/6261/84701/4609/947/1536/5228/29923/8614/94/9124/7424/2034/5352/7048/114757/5…
GO:0007259	GO:0007259	receptor signaling pathway via JAK-STAT	98	-0.451003	-1.87485	0.000171188	0.000919163	0.000500228	2790	tags=41%	list=18%	signal=34%	9111/6775/1489/3588/22876/5788/6773/602/9655/7124/23568/7132/6774/5311/11314/3586/3606/83666/3059/3587/5979/5175/4067/54625/6777/10019/6347/958/23529/9021/3718/857/6776/1545/1436/407006/3479/5008/3976/3569
GO:0009880	GO:0009880	embryonic pattern specification	45	0.545891	1.90727	0.000175358	0.0009403	0.000511731	4287	tags=58%	list=28%	signal=42%	5727/6493/6491/2066/7855/80319/57669/655/84976/7704/3234/23314/10409/4089/53820/6926/28514/10371/4435/26005/4087/4040/6911/201164/441478/23242
GO:0045408	GO:0045408	regulation of interleukin-6 biosynthetic process	22	-0.6704	-2.059	0.000177788	0.000952062	0.000518132	2418	tags=55%	list=16%	signal=46%	7124/6774/5724/51738/64170/3553/1051/3635/64581/7305/7096/972
GO:0050864	GO:0050864	regulation of B cell activation	99	-0.433197	-1.80027	0.000180111	0.000962455	0.000523789	2815	tags=44%	list=18%	signal=37%	148022/1540/54537/5788/6422/56833/975/200558/1880/933/1026/695/196/3071/11314/64127/286410/683/54440/3586/678/7128/10673/8660/64092/84433/4067/677/604/958/8741/596/23529/3635/7305/4323/2213/7099/972/4332/940/3624/4773/3569
GO:0061082	GO:0061082	myeloid leukocyte cytokine production	29	-0.622616	-2.03111	0.000180206	0.000962455	0.000523789	1354	tags=38%	list=9%	signal=35%	2621/948/2207/10859/604/8013/11213/7099/8482/972/7043
GO:1904037	GO:1904037	positive regulation of epithelial cell apoptotic process	27	-0.631836	-2.00125	0.0001807	0.000963814	0.000524528	1217	tags=30%	list=8%	signal=27%	28984/641700/6347/958/2934/6424/7057/3569
GO:0046638	GO:0046638	positive regulation of alpha-beta T cell differentiation	39	-0.579309	-2.01273	0.000180975	0.000964005	0.000524632	3154	tags=56%	list=21%	signal=45%	8767/7292/4860/51043/9655/387/3071/9308/84807/54440/3606/3707/301/941/114548/861/3965/942/7048/2737/3566/64332
GO:0051984	GO:0051984	positive regulation of chromosome segregation	27	0.625442	1.95402	0.000181357	0.00096476	0.000525043	1083	tags=30%	list=7%	signal=28%	891/9787/9700/990/2237/81620/84250/1663
GO:0010543	GO:0010543	regulation of platelet activation	27	-0.6311	-1.99891	0.000182973	0.000972075	0.000529024	1655	tags=56%	list=11%	signal=50%	5592/4846/84959/4067/2207/10019/114897/5341/2039/7099/7056/5156/5155/5270/10630
GO:0007566	GO:0007566	embryo implantation	38	-0.575169	-1.98268	0.00018427	0.000977673	0.00053207	1507	tags=42%	list=10%	signal=38%	81671/397/8434/6781/4318/3553/6696/3490/2192/8614/85360/7048/5740/5743/4313/3976
GO:0071826	GO:0071826	ribonucleoprotein complex subunit organization	190	0.360136	1.62727	0.000186402	0.000987685	0.000537519	7619	tags=68%	list=50%	signal=35%	90381/135295/25804/23212/8665/6732/6636/6632/6606/55299/10907/6635/4839/6637/60680/11168/6631/23405/1983/8607/58155/10419/50628/5433/6880/6895/8662/4686/11218/6634/83640/24144/51154/8175/6628/55011/10856/79869/6936/56853/55015/79084/27161/6426/8161/10713/6123/25929/11189/1660/10772/79752/23246/6433/26121/9326/51081/3799/22868/8487/1653/102724159/11171/55692/6633/27341/5822/192669/51747/23020/6431…
GO:0045931	GO:0045931	positive regulation of mitotic cell cycle	136	0.389672	1.69011	0.000189814	0.00100444	0.00054664	1201	tags=21%	list=8%	signal=20%	891/11065/9787/51203/995/8318/983/6790/9700/113130/990/51514/10403/9585/993/26271/4085/7480/8317/1906/27085/7015/898/81620/7517/23236/84250/675/595
GO:0000079	GO:0000079	regulation of cyclin-dependent protein serine/threonine kinase activity	89	0.432915	1.75163	0.000191026	0.00100925	0.000549253	701	tags=19%	list=5%	signal=18%	641/891/9088/995/1033/9133/9134/2810/990/1164/5347/890/993/9077/1163/899/898
GO:0007063	GO:0007063	regulation of sister chromatid cohesion	21	0.666485	1.94963	0.000191223	0.00100925	0.000549253	1856	tags=38%	list=12%	signal=34%	9700/699/113130/2237/84250/1663/8313/5885
GO:2001233	GO:2001233	regulation of apoptotic signaling pathway	361	-0.313622	-1.51617	0.000194641	0.00102594	0.000558338	1713	tags=16%	list=11%	signal=15%	57007/259230/6810/4846/3685/2537/7128/8829/5979/6672/467/5371/4055/4318/11035/4170/51330/3553/6498/3082/147138/1512/4487/3965/6279/596/5414/4000/857/7857/50486/8406/3383/960/26471/23017/219699/355/2934/972/8742/652/2070/6615/90993/85450/7078/3624/6280/7046/407006/64798/5054/6934/3479/5743/6387/7057/6423
GO:0048880	GO:0048880	sensory system development	281	-0.341861	-1.61813	0.000201813	0.00106235	0.000578156	2054	tags=23%	list=13%	signal=20%	6774/85407/118427/284217/5797/9314/6497/631/5916/80736/6722/7275/25794/8322/8854/8829/1969/5979/3684/10319/24147/23210/7291/340273/1028/197021/5159/6498/4094/1282/10312/718/6935/596/7431/57381/10848/9839/6909/1956/4814/2200/22899/1545/7070/94/155051/5156/652/7048/2737/4237/1296/712/3725/3624/1289/7046/2202/4212/7068/1290/1295/220/5764
GO:0032651	GO:0032651	regulation of interleukin-1 beta production	64	-0.507418	-1.9417	0.000202975	0.00106708	0.000580725	2519	tags=45%	list=16%	signal=38%	384/3098/3315/1903/1992/114769/834/64127/51738/7128/5371/5027/114548/8877/3965/22861/64581/80149/7305/1958/945/7099/140885/3428/4332/6348/54206/54209/3479
GO:0048525	GO:0048525	negative regulation of viral process	86	-0.4692	-1.91618	0.000206123	0.00108198	0.000588838	2553	tags=31%	list=17%	signal=26%	24138/7124/11043/91543/6041/9830/8519/4940/200316/5371/84875/81603/3434/5359/27350/4938/80149/10410/684/6351/2934/3428/10581/6348/3725/407006/7538
GO:0044818	GO:0044818	mitotic G2/M transition checkpoint	29	0.611229	1.92356	0.000206348	0.00108198	0.000588838	794	tags=31%	list=5%	signal=29%	641/983/63967/990/4998/8091/90381/11073/8883
GO:0050830	GO:0050830	defense response to Gram-positive bacterium	40	-0.580976	-2.02966	0.000207291	0.00108551	0.000590759	2799	tags=50%	list=18%	signal=41%	79792/4615/728/7124/1113/8764/84868/64170/1969/5027/948/6039/114548/3133/7097/219972/2634/5919/284297/3569
GO:1901889	GO:1901889	negative regulation of cell junction assembly	29	-0.618681	-2.01827	0.000209233	0.00109375	0.000595241	827	tags=34%	list=5%	signal=33%	90102/7097/4323/2039/23603/94/1636/4035/10395/7057
GO:0022618	GO:0022618	ribonucleoprotein complex assembly	183	0.364956	1.6541	0.000209406	0.00109375	0.000595241	7619	tags=68%	list=50%	signal=35%	90381/135295/25804/23212/8665/6732/6636/6632/6606/55299/10907/6635/4839/6637/60680/11168/6631/23405/1983/8607/58155/10419/50628/5433/6880/6895/8662/4686/11218/6634/83640/51154/8175/6628/55011/10856/79869/6936/56853/55015/79084/27161/6426/8161/10713/6123/25929/11189/1660/10772/23246/6433/26121/9326/51081/22868/8487/1653/102724159/11171/55692/6633/27341/5822/192669/51747/23020/6431/10569/9129/96764…
GO:0010035	GO:0010035	response to inorganic substance	460	-0.29676	-1.46052	0.000211337	0.0011024	0.00059995	2033	tags=21%	list=13%	signal=18%	113/8754/22872/84557/5311/30061/9314/84329/91252/23208/5831/4129/6284/6382/558/9066/10397/3586/5660/760/5641/4846/825/3707/10156/23621/7128/2353/301/140606/8913/5027/948/4318/11035/10272/6529/144402/3727/388/5159/3082/445/8877/311/10312/10628/6279/596/100271927/241/2308/857/1956/55364/80149/3383/3778/6261/2039/79901/8013/1545/308/2775/1536/1843/140885/3726/2934/7226/6678/6414/6649/4017/80310/1740…
GO:0070168	GO:0070168	negative regulation of biomineral tissue development	24	-0.666073	-2.07578	0.000212521	0.00110572	0.000601754	1642	tags=50%	list=11%	signal=45%	4846/26585/5552/2621/4054/1230/54829/144347/359845/1893/6348/5167
GO:0110150	GO:0110150	negative regulation of biomineralization	24	-0.666073	-2.07578	0.000212521	0.00110572	0.000601754	1642	tags=50%	list=11%	signal=45%	4846/26585/5552/2621/4054/1230/54829/144347/359845/1893/6348/5167
GO:0007269	GO:0007269	neurotransmitter secretion	142	0.380048	1.65057	0.000219458	0.00113809	0.000619375	2684	tags=29%	list=18%	signal=24%	90019/10814/9515/6855/6857/136/1137/5028/9378/140730/127833/8499/8825/8448/120892/8224/27445/776/5582/22871/112476/3749/815/9699/55607/5799/143425/6809/8541/320/23513/10497/28964/6853/51760/23025/9379/8867/8938/10059/8497
GO:0099643	GO:0099643	signal release from synapse	142	0.380048	1.65057	0.000219458	0.00113809	0.000619375	2684	tags=29%	list=18%	signal=24%	90019/10814/9515/6855/6857/136/1137/5028/9378/140730/127833/8499/8825/8448/120892/8224/27445/776/5582/22871/112476/3749/815/9699/55607/5799/143425/6809/8541/320/23513/10497/28964/6853/51760/23025/9379/8867/8938/10059/8497
GO:0060350	GO:0060350	endochondral bone morphogenesis	60	-0.503003	-1.91381	0.000219593	0.00113809	0.000619375	885	tags=37%	list=6%	signal=35%	5916/1293/7010/6781/302/51435/59341/4323/1291/871/64856/1292/85301/652/7048/1311/1277/7373/338773/860/4148/1303
GO:0008033	GO:0008033	tRNA processing	125	0.398222	1.7093	0.000220519	0.00114142	0.000621187	7508	tags=74%	list=49%	signal=38%	10799/129450/51728/93587/51605/6741/51002/9836/9097/8270/1478/64172/6894/10556/116461/283989/54931/10775/123263/54802/84881/11062/134637/55520/339487/54517/55644/55226/54859/126789/60528/80745/79691/10898/26610/8518/54888/55798/9692/339175/2926/79897/10785/23587/1653/4234/51654/51493/22929/25821/54482/81627/84267/283742/8846/83480/131965/79979/10248/60487/79828/22928/3028/55623/79074/113179/51637…
GO:0001659	GO:0001659	temperature homeostasis	142	-0.39132	-1.71473	0.000221331	0.00114416	0.000622675	2434	tags=30%	list=16%	signal=25%	133522/7124/79068/115209/51393/8864/2876/6774/55198/7442/3356/3606/216/7030/5334/51738/9572/948/4858/1910/3910/3553/2180/1240/1051/2308/64641/857/50486/1958/8792/8809/5733/11096/7099/7226/2034/4237/3566/8862/3480/5743
GO:0017144	GO:0017144	drug metabolic process	472	-0.298116	-1.47174	0.000222493	0.00114869	0.000625141	2161	tags=21%	list=14%	signal=19%	56994/53905/1191/47/84532/2876/7114/54498/6774/113189/29940/6482/23475/5973/5311/9314/10157/1593/5831/4129/2329/7442/56898/80736/3586/4846/216/1535/113612/8854/3684/5832/3425/58472/79611/2878/948/66002/50506/3553/2180/5153/6817/3048/217/2687/445/1512/3643/113277/4128/5321/6542/199/221/8029/7097/55022/857/1956/219/64581/80149/1958/3383/160428/90527/5322/1545/10873/947/7099/27122/3689/1536/10560/14…
GO:0002294	GO:0002294	CD4-positive	alpha-beta T cell differentiation involved in immune response	51	-0.517625	-1.91037	0.000223381	0.0011518	0.000626833	2479	tags=57%	list=16%	signal=48%	4063/6097/5914/5734/8767/7292/538/51043/602/9655/10538/1880/6774/64218/84807/3606/301/941/114548/604/3965/942/4092/3718/80149/8809/3566/64332/3569
GO:0016485	GO:0016485	protein processing	177	-0.364884	-1.64043	0.000229182	0.0011802	0.000642288	2032	tags=23%	list=13%	signal=20%	8996/114769/834/1359/83874/25825/5641/9532/10418/5552/7123/1520/2028/5027/431705/4627/1512/1522/302/8530/715/85409/64065/4323/5327/1636/2934/9509/64115/3428/2737/5328/1311/165/5270/1363/5054/2152/2619/7057/8532
GO:0051656	GO:0051656	establishment of organelle localization	375	0.296928	1.44854	0.000229509	0.00118038	0.000642385	2171	tags=17%	list=14%	signal=15%	891/83540/9787/3833/51203/81930/1058/9928/11004/9700/113130/55143/10814/1062/5347/10403/10615/81610/92558/5265/4085/136/54908/89958/1063/9493/3835/2294/8825/10053/120892/25893/29899/81620/23212/1294/80128/2890/3993/55166/22871/547/3798/3815/5590/64149/1075/5080/147872/7430/254263/8697/284021/55686/284071/137886/4139/4133/79003/150365/7514/4137/23513/357/5880
GO:0034329	GO:0034329	cell junction assembly	356	-0.314131	-1.51469	0.00023155	0.00118754	0.000646286	2418	tags=28%	list=16%	signal=24%	10266/8874/6422/5583/389/7408/7124/79414/64405/387/6092/2902/26052/85358/23499/139065/3611/3914/9948/81/9647/60437/64218/51564/57555/8321/9863/81671/1845/7010/64284/6624/79834/5339/7414/2316/266977/6722/51738/50944/7094/8829/1969/10611/3987/5175/90952/11187/22998/2702/64101/54413/2701/2239/55679/861/10391/27253/7122/4092/596/90102/7097/347902/857/10979/59341/4323/7145/2335/2039/10052/1012/1003/70…
GO:0070266	GO:0070266	necroptotic process	35	-0.594264	-2.04817	0.000231558	0.00118754	0.000646286	2969	tags=49%	list=19%	signal=39%	8837/148022/1540/353376/7124/197259/8531/11035/5836/23643/857/253430/7098/355/7099/929/407006
GO:0030218	GO:0030218	erythrocyte differentiation	101	-0.433701	-1.80174	0.000231787	0.00118754	0.000646286	2520	tags=31%	list=16%	signal=26%	567/3303/1777/2113/84456/8444/6774/51341/3071/55553/6722/3059/23210/4067/9935/6886/10320/6777/10019/677/604/6688/3635/3718/2039/2034/652/10365/3624/407006/7538
GO:0061045	GO:0061045	negative regulation of wound healing	58	-0.516961	-1.95506	0.000232461	0.00118948	0.000647341	1655	tags=38%	list=11%	signal=34%	5592/4846/84959/58189/11221/2247/10019/114897/302/90102/5327/308/947/7056/5156/710/5155/5328/2191/5270/5054/7057
GO:1902042	GO:1902042	negative regulation of extrinsic apoptotic signaling pathway via death domain receptors	32	-0.595993	-1.97813	0.000233129	0.00119139	0.000648377	2495	tags=44%	list=16%	signal=37%	8682/8717/2876/8743/4846/7128/3082/3383/23017/355/85450/407006/5054/6423
GO:0045600	GO:0045600	positive regulation of fat cell differentiation	55	-0.502325	-1.88841	0.00023529	0.0012009	0.000653557	1287	tags=35%	list=8%	signal=32%	6422/25819/252995/1389/5467/3356/168455/1240/1051/677/80149/2487/284207/10974/7538/5919/84935/5743/6423
GO:0030574	GO:0030574	collagen catabolic process	36	-0.587507	-2.02485	0.000237069	0.00120845	0.000657665	2072	tags=53%	list=14%	signal=46%	1471/9902/3688/1514/1520/79148/1508/4318/4320/4323/9509/1513/64115/1306/8510/2191/4312/4327/4313
GO:0006775	GO:0006775	fat-soluble vitamin metabolic process	27	-0.624902	-1.97928	0.000239841	0.0012199	0.000663894	2418	tags=59%	list=16%	signal=50%	120227/5947/7124/2260/5467/4790/1593/5641/56603/8854/66002/3553/8029/5360/7421/6615
GO:0014013	GO:0014013	regulation of gliogenesis	90	-0.440063	-1.79579	0.00023992	0.0012199	0.000663894	1307	tags=26%	list=9%	signal=24%	26011/2119/11221/4067/3553/22891/5324/89927/1435/146433/23529/7097/7133/23500/4035/6348/5270/3400/407006/54209/5764/3976/3569
GO:1903035	GO:1903035	negative regulation of response to wounding	71	-0.489558	-1.91003	0.00024084	0.00122303	0.0006656	1655	tags=35%	list=11%	signal=32%	5592/4846/84959/58189/11221/2247/6696/10019/114897/302/90102/56963/5327/308/947/11202/7056/5156/710/5155/5328/2191/5270/5054/7057
GO:0002700	GO:0002700	regulation of production of molecular mediator of immune response	115	-0.426243	-1.80517	0.000241996	0.00122735	0.00066795	2580	tags=42%	list=17%	signal=35%	5788/567/3098/7124/975/200558/91543/8764/3134/933/695/115004/64127/54440/5650/3586/6810/3606/284/948/3553/2207/114548/10859/604/4092/958/8741/3133/23529/3718/8809/7133/2213/7098/8013/11213/7099/684/8482/972/3554/7043/3077/3566/940/9865/3569
GO:0030593	GO:0030593	neutrophil chemotaxis	63	-0.504853	-1.92472	0.000248053	0.00125649	0.000683809	2423	tags=48%	list=16%	signal=40%	728/8729/83700/2920/5142/27202/3071/7409/3557/683/5293/9750/3553/120425/4354/2207/6347/6279/1441/2921/719/3689/6351/3680/8291/972/6348/6349/6280/9353
GO:0097028	GO:0097028	dendritic cell differentiation	32	-0.595089	-1.97513	0.000251161	0.00127064	0.000691507	1895	tags=56%	list=12%	signal=49%	10538/140685/558/2621/4055/4067/55365/1051/10859/3965/10288/6688/55509/28959/2213/7226/7048/54209
GO:0031032	GO:0031032	actomyosin structure organization	168	-0.381266	-1.70457	0.000253027	0.00127847	0.000695769	1937	tags=32%	list=13%	signal=28%	9948/80206/9647/3688/399687/7454/2036/1902/116985/55616/825/6722/4070/50507/8829/5829/221692/29767/10174/85462/7791/22998/7984/28984/1265/7168/1901/5159/4627/5295/8477/29109/10411/10391/3693/90102/1266/22899/79822/4629/55160/5239/23136/5156/1465/10395/7043/10580/2006/4621/1490/7046/25802/1264
GO:0002755	GO:0002755	MyD88-dependent toll-like receptor signaling pathway	33	-0.601423	-2.01744	0.00025851	0.00130453	0.000709955	2884	tags=52%	list=19%	signal=42%	10333/3659/4615/7316/3654/695/11314/3656/948/146722/23643/7097/11213/7099/7096/51284/929
GO:0034368	GO:0034368	protein-lipid complex remodeling	20	0.676857	1.95683	0.000260088	0.00130922	0.000712505	1734	tags=55%	list=11%	signal=49%	213/336/344/4023/183/341/7941/9388/335/4018/55937
GO:0034369	GO:0034369	plasma lipoprotein particle remodeling	20	0.676857	1.95683	0.000260088	0.00130922	0.000712505	1734	tags=55%	list=11%	signal=49%	213/336/344/4023/183/341/7941/9388/335/4018/55937
GO:0043123	GO:0043123	positive regulation of I-kappaB kinase/NF-kappaB signaling	165	-0.384926	-1.71956	0.000269563	0.00135522	0.000737539	3227	tags=39%	list=21%	signal=31%	3661/65018/11214/3162/10333/8767/7188/79155/55223/8837/2280/148022/25/7052/5970/4615/24138/389/4215/3956/80216/353376/7124/11043/8717/387/3654/7132/5581/80833/6398/57449/10346/286343/114769/834/8743/3557/10475/64127/1902/6284/2316/10769/64170/5587/57161/9020/948/81603/4055/84433/3553/10783/920/3965/113277/6275/958/7098/7099/684/1896/972/1893
GO:0034101	GO:0034101	erythrocyte homeostasis	109	-0.431392	-1.81312	0.000270928	0.00135802	0.000739063	2520	tags=30%	list=16%	signal=25%	567/3303/1777/2113/84456/8444/6774/51341/3071/55553/558/6722/3059/23210/4067/9935/3216/6886/10320/6777/10019/677/604/6688/3635/3718/2039/2034/652/10365/3624/407006/7538
GO:0071774	GO:0071774	response to fibroblast growth factor	125	-0.408084	-1.73693	0.000270928	0.00135802	0.000739063	1781	tags=23%	list=12%	signal=21%	161742/64094/81848/678/200734/2246/2247/10631/55614/677/3164/6347/9592/3730/960/1960/3371/10252/23213/55959/79633/90993/1490/1277/8862/7538/860/7057/2252
GO:0072676	GO:0072676	lymphocyte migration	78	-0.471786	-1.87897	0.00027121	0.00135802	0.000739063	2362	tags=35%	list=15%	signal=29%	387/80024/8764/1880/4267/4478/6793/5293/9750/81704/5979/2621/11035/1901/64005/9420/6347/131450/199/3383/23143/6351/1893/6348/6349/9547/6387
GO:0044773	GO:0044773	mitotic DNA damage checkpoint	95	0.430696	1.75934	0.000271469	0.00135802	0.000739063	2689	tags=27%	list=18%	signal=23%	641/891/995/1869/983/6790/144455/2810/63967/51512/79733/8091/146956/4436/5111/595/11200/65975/5591/55159/1027/1017/29980/57472/54962/3364
GO:0072331	GO:0072331	signal transduction by p53 class mediator	255	0.32871	1.52802	0.00027341	0.00136603	0.000743424	4318	tags=41%	list=28%	signal=30%	641/891/9156/995/9212/22974/1869/983/6790/144455/2810/2305/1111/51512/5366/1870/79733/5983/79915/83990/27330/116028/4436/5984/580/4101/266740/11073/7159/23212/5985/5111/3066/6119/675/80010/55170/29108/1107/5810/8851/11200/4839/151126/26155/5982/3094/9521/5932/10419/7156/1763/79813/672/6880/83695/5884/6879/1027/83596/1017/57472/11198/3364/6874/5928/133383/80196/10614/6875/9100/117584/4361/6873/327…
GO:0060323	GO:0060323	head morphogenesis	32	-0.593549	-1.97002	0.000276997	0.00138148	0.000751832	1003	tags=31%	list=7%	signal=29%	84159/4487/7122/5156/64651/7043/4621/1277/83716/4313
GO:0034367	GO:0034367	protein-containing complex remodeling	21	0.657934	1.92462	0.000277188	0.00138148	0.000751832	1734	tags=52%	list=11%	signal=47%	213/336/344/4023/183/341/7941/9388/335/4018/55937
GO:0034121	GO:0034121	regulation of toll-like receptor signaling pathway	57	-0.515236	-1.945	0.000279129	0.00138943	0.000756159	2427	tags=42%	list=16%	signal=36%	353376/91543/153090/23151/23098/55198/11314/1535/7128/9572/26191/948/4067/146722/23643/2099/7097/857/338382/7098/11213/7099/7096/929
GO:0000768	GO:0000768	syncytium formation by plasma membrane fusion	43	-0.558172	-1.97444	0.000280448	0.00139256	0.00075786	3138	tags=53%	list=21%	signal=43%	30846/2323/8837/928/8536/9518/22904/975/5738/824/8754/9750/963/4627/10411/9644/7305/8038/10938/3566/26509/54209/4773
GO:0140253	GO:0140253	cell-cell fusion	43	-0.558172	-1.97444	0.000280448	0.00139256	0.00075786	3138	tags=53%	list=21%	signal=43%	30846/2323/8837/928/8536/9518/22904/975/5738/824/8754/9750/963/4627/10411/9644/7305/8038/10938/3566/26509/54209/4773
GO:0051403	GO:0051403	stress-activated MAPK cascade	245	-0.340447	-1.58837	0.000282974	0.00140337	0.000763745	2418	tags=26%	list=16%	signal=22%	7124/5187/3654/9261/153090/8324/10221/10550/9064/4790/23043/197259/5470/3557/57630/64127/9464/1845/6386/64170/26191/3656/8322/5606/2122/29969/11221/4055/221472/7984/3553/3082/8877/148170/677/3965/23328/9839/768211/2308/9770/1956/59341/80149/8792/9459/10044/344558/2213/7098/355/4609/7099/1843/140885/8325/1326/4920/1490/7538/3480/4616/6423
GO:0042130	GO:0042130	negative regulation of T cell proliferation	42	-0.563858	-1.98402	0.000285942	0.00141634	0.000770804	3162	tags=52%	list=21%	signal=42%	7040/5074/51043/3620/29126/384/8764/84868/3586/10457/2615/941/1051/10859/3965/942/10288/3559/80380/64115/652/11326
GO:0003151	GO:0003151	outflow tract morphogenesis	68	-0.484725	-1.89614	0.000286934	0.00141951	0.000772529	2678	tags=37%	list=18%	signal=30%	23414/26508/182/6092/8828/3611/8321/9464/8829/7291/2702/10370/6091/7122/55742/6909/6261/2022/23129/652/7048/3725/2006/9249/6423
GO:0045824	GO:0045824	negative regulation of innate immune response	46	-0.540002	-1.95265	0.000289687	0.00143137	0.000778983	2879	tags=54%	list=19%	signal=44%	10062/10906/79671/11277/60343/197358/9111/10225/56833/79132/2896/3134/84868/7128/11221/54625/10859/3965/3133/11213/84166/3428/710/1378/11326
GO:1903845	GO:1903845	negative regulation of cellular response to transforming growth factor beta stimulus	69	-0.476131	-1.86272	0.000294796	0.00145483	0.00079175	2608	tags=38%	list=17%	signal=31%	283149/3303/7316/2734/7041/51341/858/6497/57154/65997/94031/114990/6498/4092/857/2200/406890/54829/50515/83891/7048/7043/375387/11117/7046/5654
GO:0010633	GO:0010633	negative regulation of epithelial cell migration	68	-0.483324	-1.89066	0.000300706	0.00148218	0.000806637	2496	tags=40%	list=16%	signal=33%	51466/574506/387/153090/406943/5793/22846/5797/9314/161742/56999/4070/6672/6781/6915/11221/28984/2247/79812/285/23603/94/1634/407006/9353/406994/7057
GO:0090050	GO:0090050	positive regulation of cell migration involved in sprouting angiogenesis	21	-0.665639	-2.00576	0.000302884	0.00149109	0.000811485	3173	tags=81%	list=21%	signal=64%	3162/406888/7422/25/4215/10519/9734/51564/406913/10769/301/57608/8829/2247/57381/27286/5743
GO:0005976	GO:0005976	polysaccharide metabolic process	93	-0.429407	-1.7684	0.000306301	0.00150608	0.000819638	2447	tags=33%	list=16%	signal=28%	3340/55276/8509/51422/8987/2548/313/8864/56548/4790/3037/4126/2632/648791/3038/9572/8660/5509/5836/3643/79660/8908/8445/80183/84752/51294/5155/2134/10580/3479/5167
GO:0000271	GO:0000271	polysaccharide biosynthetic process	64	-0.496496	-1.8999	0.000312528	0.00153482	0.00083528	2593	tags=36%	list=17%	signal=30%	55454/3340/55276/8509/8864/4790/3037/2632/648791/3038/9572/8660/5509/3643/79660/8908/8445/84752/5155/2134/10580/3479/5167
GO:0002698	GO:0002698	negative regulation of immune effector process	101	-0.429544	-1.78447	0.000317299	0.00155635	0.000846998	2866	tags=45%	list=19%	signal=36%	3162/7040/7292/29/90865/51043/10875/10225/5788/9655/56833/6397/7124/79132/2896/966/3134/933/84868/11314/10475/3586/301/284/11221/1604/10859/604/3965/4092/3133/8832/3718/80149/2213/3559/11213/684/710/7043/3077/3566/1378/11326/5654
GO:0044344	GO:0044344	cellular response to fibroblast growth factor stimulus	120	-0.405575	-1.72872	0.00031907	0.00156313	0.00085069	1781	tags=22%	list=12%	signal=20%	161742/64094/81848/678/200734/2246/2247/10631/55614/677/3164/6347/3730/960/1960/10252/23213/55959/79633/90993/1490/1277/8862/7538/860/7057/2252
GO:0010524	GO:0010524	positive regulation of calcium ion transport into cytosol	37	-0.57734	-1.98653	0.000320176	0.00156664	0.000852601	2789	tags=43%	list=18%	signal=35%	25/2852/2902/5311/825/5027/9002/920/10268/857/187/7070/623/7220/57214/57158
GO:0008064	GO:0008064	regulation of actin polymerization or depolymerization	157	-0.372613	-1.65435	0.000321393	0.00157069	0.000854805	3258	tags=36%	list=21%	signal=29%	6712/50853/23406/6711/2017/11078/23191/11034/382/64857/8440/146206/653857/23189/10109/23075/7408/51466/387/5581/832/9948/11344/80206/7114/10095/3071/7454/55243/10458/5063/51332/9886/9535/10435/3059/9037/29767/91663/57731/148170/3055/2059/10602/51474/3383/5341/2039/79822/11135/2934/163782/93663/2006/9353/6387/25802
GO:0033674	GO:0033674	positive regulation of kinase activity	493	-0.286768	-1.4194	0.000323029	0.00157677	0.000858113	2522	tags=24%	list=16%	signal=21%	4215/7316/8682/9500/2914/728/7124/975/7349/387/2260/3654/1848/9261/10519/646643/153090/51422/107/9966/3611/1191/1026/9064/113/8754/5311/1847/23043/3071/197259/1849/11314/64127/1902/5063/7010/6464/3356/3606/6793/26585/196883/51738/284/3656/8322/50507/5587/5606/5979/5027/9294/2621/9020/29969/11035/23533/221472/4067/2246/7984/28984/3553/2247/2180/5159/920/22924/6886/2321/3082/56892/4739/2357/3643/60…
GO:0000726	GO:0000726	non-recombinational repair	77	0.464571	1.8165	0.000325217	0.00158378	0.000861927	4827	tags=55%	list=32%	signal=38%	79000/8091/10721/112441434/580/55135/10459/9937/7468/7518/7336/5591/7334/5932/64858/672/23347/10213/548593/5422/24144/5893/7515/55183/79008/4361/84464/5423/51720/22976/7341/4683/3981/79840/51149/79184/7520/55693/64421/2072/27343/10111
GO:0003158	GO:0003158	endothelium development	111	-0.418983	-1.76192	0.000325251	0.00158378	0.000861927	3014	tags=40%	list=20%	signal=32%	57826/7422/54567/5908/5138/55897/23462/3687/182/7124/81792/387/7132/1903/8985/2876/4478/30061/4855/8829/6781/9294/5175/91663/2246/3553/2702/388/1901/2701/10411/6935/7122/302/3383/2022/84913/947/1003/94/652/57493/10630/5764
GO:0060402	GO:0060402	calcium ion transport into cytosol	120	-0.404993	-1.72624	0.000328252	0.00159646	0.000868828	2365	tags=41%	list=15%	signal=35%	7040/22821/2946/6263/2280/817/1234/25/57190/2852/5788/1756/2902/5581/80024/5336/8996/5311/7442/2905/3356/825/1535/84959/3709/5371/5027/4067/2247/9002/53373/920/596/10268/857/6261/187/57338/7070/623/5330/7226/6348/2906/7220/287/5350/57214/57158
GO:0007606	GO:0007606	sensory perception of chemical stimulus	121	0.402885	1.71127	0.000331207	0.00160889	0.000875592	5491	tags=56%	list=36%	signal=36%	1469/390538/341359/441669/4995/729759/7480/343171/50839/5284/51176/391190/26531/4975/5024/391192/390323/390037/391112/282763/259296/50838/50840/127062/341152/259295/259293/8195/259290/442191/4991/219982/3710/285659/4025/26533/391191/81099/219981/26246/127623/390199/120793/127064/119682/391211/390036/79549/259292/390264/259294/125963/8383/162998/219447/6339/390882/26693/51308/26664/390445/26245/26…
GO:0046579	GO:0046579	positive regulation of Ras protein signal transduction	53	-0.519733	-1.94243	0.000331738	0.00160953	0.000875939	2144	tags=42%	list=14%	signal=36%	115727/286530/7409/9289/1902/6464/2057/3707/8660/4067/9002/10161/5159/8477/2828/6091/1435/157285/221002/9162/1281/3479
GO:0003231	GO:0003231	cardiac ventricle development	110	-0.418048	-1.76223	0.000333091	0.00161415	0.000878453	1199	tags=19%	list=8%	signal=18%	7168/2702/10370/6091/4092/4634/10848/57167/140706/2022/652/6586/7048/57493/80000/1363/7046/9353/3491/1301/6423
GO:0002792	GO:0002792	negative regulation of peptide secretion	114	-0.414958	-1.76007	0.000339565	0.00164355	0.000894452	2570	tags=35%	list=17%	signal=29%	6422/90007/384/7124/1113/7349/64285/91543/933/27202/9734/7114/1992/114769/23208/3586/51738/5552/7128/301/284/26191/5371/2615/2621/28984/3553/114548/114899/10859/131450/80149/2335/2213/308/947/353500/972/2633/284297
GO:0008154	GO:0008154	actin polymerization or depolymerization	186	-0.357422	-1.61726	0.000340907	0.00164806	0.000896909	3258	tags=35%	list=21%	signal=28%	6712/50853/23406/6711/2017/11078/23191/11034/382/64857/8440/146206/51734/7456/653857/23189/10109/23075/7408/51466/22921/387/8522/5581/832/9948/11344/80206/7114/10095/3071/7454/55243/10458/5063/51332/9886/9535/10435/3059/51738/9037/9645/29767/91663/57731/9051/148170/3055/2059/199/10602/51474/3383/5341/10810/2039/79822/11135/2934/163782/93663/2006/9353/6387/25802
GO:0032653	GO:0032653	regulation of interleukin-10 production	41	-0.555361	-1.94883	0.000342408	0.00165216	0.000899143	1828	tags=51%	list=12%	signal=45%	29126/602/28951/9308/64127/54440/2207/3082/10859/3965/7097/3718/64581/7305/2213/947/7099/80380/64115/940/54209
GO:2001234	GO:2001234	negative regulation of apoptotic signaling pathway	201	-0.355649	-1.62504	0.000342577	0.00165216	0.000899143	2502	tags=23%	list=16%	signal=19%	3303/8682/2771/10625/7124/8717/3315/1191/2876/8996/8531/8743/57630/57007/4846/3685/2537/7128/8829/4318/4170/3553/3082/596/4000/7857/3383/960/23017/219699/355/972/652/2070/6615/90993/85450/7046/407006/5054/6934/3479/5743/6387/7057/6423
GO:0030183	GO:0030183	B cell differentiation	100	-0.436582	-1.80996	0.000347066	0.00167181	0.000909836	2813	tags=43%	list=18%	signal=35%	1540/25/29760/56262/5788/6422/3956/602/56833/5336/1880/974/9452/9734/695/51341/3688/3071/5452/286410/4242/3586/3589/3087/678/1316/112616/84433/5295/677/604/10312/596/23529/3635/3718/55619/4323/3955/139818/2213/4066/3624
GO:0033273	GO:0033273	response to vitamin	77	-0.462835	-1.84367	0.000347991	0.00167427	0.000911171	1514	tags=27%	list=10%	signal=25%	7299/56603/8854/6781/2621/5292/10631/920/6696/1956/25959/8614/3371/2934/6678/7421/590/1277/5743/5764/2350
GO:0051298	GO:0051298	centrosome duplication	62	0.493251	1.84515	0.0003523	0.00169123	0.000920402	4019	tags=50%	list=26%	signal=37%	6491/10733/25886/899/284403/22995/163786/7517/55722/675/9475/9793/9738/85459/29901/7514/348654/672/25914/55835/1017/4591/79959/26973/55125/116840/9662/26005/55755/22994/9525
GO:0007492	GO:0007492	endoderm development	65	-0.482455	-1.85228	0.000352357	0.00169123	0.000920402	1664	tags=31%	list=11%	signal=28%	1284/3685/4318/55614/677/3693/4323/2335/1291/3689/3912/652/3624/1289/3678/1290/1295/4313/1303/1301
GO:0006959	GO:0006959	humoral immune response	129	-0.408167	-1.75691	0.00036279	0.00173923	0.000946528	2479	tags=41%	list=16%	signal=35%	602/728/7124/1113/3075/975/1675/3426/721/629/2920/1880/1191/966/27202/5452/9308/683/720/5650/7030/717/6039/28984/1604/3553/5699/718/6347/716/6279/3133/596/715/2921/51435/6556/2213/3119/719/714/713/54210/710/730/712/940/6280/54209/1378/11326/5919/3569
GO:2000401	GO:2000401	regulation of lymphocyte migration	50	-0.538925	-1.99078	0.00036393	0.00174262	0.000948371	2362	tags=36%	list=15%	signal=31%	83692/387/80024/8764/4478/6793/9750/81704/11035/6347/131450/199/23143/6351/1893/6348/9547/6387
GO:0090066	GO:0090066	regulation of anatomical structure size	417	-0.294832	-1.44199	0.000366806	0.00175431	0.000954731	3258	tags=34%	list=21%	signal=27%	6712/50853/23406/196527/6711/59342/2017/27185/11078/3162/6648/23191/11034/382/64857/80005/8440/7422/538/146206/2982/1889/133/2053/10242/9368/135/25/56262/653857/1909/23189/3783/2852/10109/23075/7408/51466/8301/1113/7349/387/51393/10509/5581/85358/3269/832/23499/83547/143872/3611/9948/5467/11344/8985/80206/8864/2876/7114/64218/9732/4478/5797/10095/3071/7454/7409/55243/23645/5916/10458/5063/51332/9…
GO:0050848	GO:0050848	regulation of calcium-mediated signaling	86	-0.458711	-1.87335	0.000367471	0.00175541	0.000955329	2504	tags=31%	list=16%	signal=26%	9454/10725/7124/58529/1756/916/10519/933/5311/2274/683/920/1240/10231/5341/1012/57338/8445/6351/6348/54209/29995/5350/3479/57158/1827/2633
GO:0072401	GO:0072401	signal transduction involved in DNA integrity checkpoint	71	0.467514	1.80627	0.000368566	0.00175647	0.000955906	259	tags=17%	list=2%	signal=17%	891/995/1869/983/6790/144455/2810/1111/51512/51514/5347/79733
GO:0072422	GO:0072422	signal transduction involved in DNA damage checkpoint	71	0.467514	1.80627	0.000368566	0.00175647	0.000955906	259	tags=17%	list=2%	signal=17%	891/995/1869/983/6790/144455/2810/1111/51512/51514/5347/79733
GO:1901654	GO:1901654	response to ketone	153	-0.384539	-1.71035	0.000369445	0.00175858	0.000957055	1984	tags=24%	list=13%	signal=21%	196/11057/4478/9314/4129/1535/5724/2353/6915/687/54541/6696/445/10628/3490/7097/2308/857/1956/3383/1536/1843/3371/6586/7043/54206/1946/10365/8061/2354/266743/5350/9353/387758/5764/7057
GO:0071407	GO:0071407	cellular response to organic cyclic compound	492	-0.29388	-1.45514	0.000374352	0.00177983	0.00096862	2155	tags=20%	list=14%	signal=18%	1191/5142/7041/5467/6774/115004/51341/858/196/5311/11057/4478/9612/4790/9314/2274/7025/8611/64127/5916/5063/7442/3586/3356/3606/2316/1535/5724/678/9572/301/50507/3709/1408/3784/6781/5027/2494/687/5292/3274/3434/54541/53829/3553/6696/445/1051/9420/677/10411/861/81035/3164/6347/199/2099/10268/2308/857/1956/333/55364/80149/1958/3383/6261/2039/2769/7098/8013/1545/2775/25959/3399/3371/8204/7226/652/16…
GO:0071622	GO:0071622	regulation of granulocyte chemotaxis	32	-0.582514	-1.93339	0.000375368	0.00178255	0.000970104	2423	tags=50%	list=16%	signal=42%	728/83700/27202/3071/683/9750/4354/1240/1435/59341/719/8291/972/5919/9353/7057
GO:0002720	GO:0002720	positive regulation of cytokine production involved in immune response	47	-0.535567	-1.93443	0.000376777	0.00178714	0.0009726	2520	tags=47%	list=16%	signal=39%	567/3098/975/91543/8764/3134/64127/54440/3606/948/3553/2207/114548/10859/3133/8809/8013/7099/8482/972/3554/3569
GO:0060401	GO:0060401	cytosolic calcium ion transport	138	-0.390907	-1.70179	0.00038412	0.00181983	0.000990388	3103	tags=38%	list=20%	signal=30%	22821/2946/6263/90550/2280/488/817/1234/25/57190/2852/5788/1756/2902/5581/80024/5336/8996/10367/5311/7442/2905/3356/825/1535/84959/3709/5371/5027/4067/2247/9002/53373/920/596/10268/857/6261/187/57338/7070/623/5330/7226/6348/2906/1490/7220/287/5350/57214/57158
GO:0002828	GO:0002828	regulation of type 2 immune response	24	-0.653818	-2.03759	0.0003909	0.00184977	0.00100668	3043	tags=71%	list=20%	signal=57%	7292/90865/3620/384/9655/975/91543/64127/3606/301/114548/604/942/972/1893/3566/3569
GO:0003206	GO:0003206	cardiac chamber morphogenesis	109	-0.425447	-1.78814	0.000391836	0.00185188	0.00100783	1883	tags=28%	list=12%	signal=24%	8321/9464/7010/4846/6722/8829/7168/2702/10370/6091/4092/4634/55742/10848/6909/140706/2022/652/6586/7048/9510/57493/6608/1363/9249/7046/9353/3491/1301/6423
GO:0045429	GO:0045429	positive regulation of nitric oxide biosynthetic process	34	-0.593202	-2.01702	0.000392265	0.00185188	0.00100783	2418	tags=47%	list=16%	signal=40%	7124/1191/5311/9314/7442/948/3553/445/3643/199/64581/3383/7099/3689/10365/5743
GO:0003179	GO:0003179	heart valve morphogenesis	49	-0.520033	-1.91352	0.000394644	0.00186093	0.00101276	1642	tags=41%	list=11%	signal=37%	54567/4772/23462/26508/182/6092/4846/56999/7291/2702/6091/10439/652/6586/7048/6615/2006/11117/9353/3491
GO:2000514	GO:2000514	regulation of CD4-positive	alpha-beta T cell activation	47	-0.53332	-1.92632	0.000405947	0.00191199	0.00104054	2563	tags=53%	list=17%	signal=44%	29126/384/9655/975/3071/9308/57630/84807/54440/3606/301/1604/941/114548/604/861/3965/942/4092/3718/80149/64115/7048/3566/64332
GO:1903792	GO:1903792	negative regulation of anion transport	21	-0.65662	-1.97858	0.00041161	0.00193639	0.00105383	2276	tags=43%	list=15%	signal=37%	2917/10550/5997/8660/2564/22925/6424/7057/5999
GO:0010714	GO:0010714	positive regulation of collagen metabolic process	22	-0.649782	-1.99567	0.00041567	0.00195321	0.00106298	1217	tags=41%	list=8%	signal=38%	28984/5159/7431/2022/64115/652/7043/90993/1490
GO:0032755	GO:0032755	positive regulation of interleukin-6 production	73	-0.475718	-1.86644	0.000416944	0.00195692	0.001065	2866	tags=49%	list=19%	signal=40%	10333/8767/7292/90865/148022/84818/4615/7124/7349/26137/6774/3557/64127/1535/5724/64170/5027/948/7291/3553/4155/2207/3965/199/10288/7097/64581/59341/7305/338382/7098/7099/7096/972/51284/3569
GO:0006303	GO:0006303	double-strand break repair via nonhomologous end joining	69	0.462324	1.76629	0.000420813	0.00197278	0.00107363	5529	tags=61%	list=36%	signal=39%	79000/8091/10721/112441434/580/55135/10459/9937/7468/7518/7336/5591/7334/64858/672/23347/10213/5422/24144/7515/55183/4361/5423/51720/22976/7341/4683/3981/79840/51149/79184/7520/55693/64421/2072/27343/10111/84309/78996/2547/6419/8924
GO:0007064	GO:0007064	mitotic sister chromatid cohesion	21	0.646592	1.89144	0.000421603	0.00197418	0.00107439	1010	tags=24%	list=7%	signal=22%	991/113130/151648/79075/84250
GO:0071295	GO:0071295	cellular response to vitamin	27	-0.611966	-1.93831	0.000422573	0.00197642	0.00107561	1354	tags=33%	list=9%	signal=30%	2621/5292/10631/25959/3371/7421/1277/5764/2350
GO:0050764	GO:0050764	regulation of phagocytosis	84	-0.45261	-1.84692	0.00042466	0.00198388	0.00107967	2039	tags=39%	list=13%	signal=34%	55198/3071/399687/11314/23208/3601/720/4240/9066/5873/1535/3685/7275/717/2621/948/3553/146722/2207/8877/3055/718/6347/7097/64581/1794/6556/2213/140885/11031/8291/4035/54209
GO:0014912	GO:0014912	negative regulation of smooth muscle cell migration	25	-0.643173	-2.02719	0.000428258	0.00199837	0.00108756	2579	tags=56%	list=17%	signal=47%	100126315/574506/10221/3611/5467/5592/7168/3486/199/693223/407000/4035/9353/5054
GO:0002431	GO:0002431	Fc receptor mediated stimulatory signaling pathway	83	-0.451248	-1.83413	0.000433097	0.00201663	0.00109749	2851	tags=31%	list=19%	signal=26%	7456/25/5788/10109/1793/5581/5336/55198/919/10095/3071/7454/7409/10458/4067/64005/2207/5295/3055/5359/2213/8013/196051/2212/2214/2209
GO:0031098	GO:0031098	stress-activated protein kinase signaling cascade	273	-0.328365	-1.55448	0.000433172	0.00201663	0.00109749	2418	tags=25%	list=16%	signal=22%	7124/5187/387/3654/9261/646643/153090/8324/10221/10550/9064/4790/23043/197259/5470/3557/57630/64127/9464/1845/5063/6793/6386/64170/26191/3656/8322/5606/2122/9020/29969/11221/4055/221472/4067/7984/3553/3082/8877/148170/677/3965/23328/9839/768211/2308/9770/1956/59341/80149/8792/9459/10044/344558/2213/7098/355/4609/7099/1843/140885/8325/1326/4920/1490/7538/3480/4616/6423
GO:0010833	GO:0010833	telomere maintenance via telomere lengthening	80	0.432939	1.71658	0.000437135	0.00203273	0.00110626	4827	tags=46%	list=32%	signal=32%	9212/5588/5570/80119/5888/4751/7015/55135/22948/908/64858/55651/10694/7203/142/548593/167227/79008/4361/84464/6950/9887/6117/55226/3183/3181/7013/225689/10576/10574/10575/7520/23381/2072/3104/1736/10111
GO:0090257	GO:0090257	regulation of muscle system process	194	-0.353485	-1.60739	0.0004385	0.00203672	0.00110843	2414	tags=27%	list=16%	signal=23%	1113/7349/1756/387/7132/143872/5142/8996/9732/9314/10203/9464/4660/5592/4846/2316/5997/5724/6722/51738/3784/6781/6915/7168/2702/8877/4092/199/4634/10398/4000/2308/857/4608/80149/3778/7133/8013/147/3759/10008/255743/54206/1490/287/29995/5350/3479/5743/1264/126393/5999
GO:1904892	GO:1904892	regulation of receptor signaling pathway via STAT	82	-0.450539	-1.82173	0.000439155	0.00203741	0.0011088	2696	tags=40%	list=18%	signal=33%	1489/3588/22876/5788/602/7124/23568/7132/6774/11314/4249/3586/3606/83666/3059/3587/5979/5175/4067/54625/10019/958/23529/9021/3718/857/1545/1436/407006/3479/5008/3976/3569
GO:0043277	GO:0043277	apoptotic cell clearance	41	-0.550261	-1.93094	0.000440237	0.00204009	0.00111026	1738	tags=51%	list=11%	signal=46%	721/81567/720/9886/558/4240/3685/717/286046/23210/2621/948/146722/718/6347/3690/7305/375033/4035/54209/7057
GO:0003279	GO:0003279	cardiac septum development	102	-0.419986	-1.74992	0.000441094	0.00204171	0.00111114	1198	tags=20%	list=8%	signal=18%	2702/10370/6091/4092/11174/55742/57167/6909/2022/23129/652/6586/7048/57493/6608/9249/7046/287/9353/3491
GO:0052548	GO:0052548	regulation of endopeptidase activity	310	-0.317748	-1.51525	0.000443215	0.00204917	0.0011152	2418	tags=26%	list=16%	signal=23%	7124/5696/8717/1611/387/2902/721/1612/406943/9966/10550/83595/23151/2876/9647/1992/1471/6774/8996/5973/114769/834/9314/5271/8743/57630/1293/83874/720/5641/4804/2537/64170/8434/5371/2621/58189/6690/4318/4067/56925/4155/114548/3082/1512/3965/6091/718/837/6279/8530/3730/22861/7077/64581/64065/960/89932/355/4609/684/871/1475/5918/2934/64115/3428/710/10395/6695/5270/1800/7078/1490/6280/1378/5054/3491/…
GO:0050819	GO:0050819	negative regulation of coagulation	40	-0.563047	-1.96702	0.00045516	0.00210199	0.00114395	1655	tags=45%	list=11%	signal=40%	5592/4846/84959/10019/114897/302/5327/308/947/7056/5156/710/5155/5328/2191/5270/5054/7057
GO:1903531	GO:1903531	negative regulation of secretion by cell	167	-0.371079	-1.6582	0.000463688	0.00213891	0.00116404	2570	tags=32%	list=17%	signal=27%	6422/90007/1407/384/2771/7124/1113/7349/64285/91543/2917/7132/3134/933/27202/9734/7114/1992/114769/11314/23208/4129/3586/3589/51738/5552/7128/114088/301/284/26191/5371/2615/2621/28984/3553/114548/114899/10859/3965/131450/8832/80149/7133/2335/2213/308/947/353500/3624/5008/2633/284297/3976
GO:0030509	GO:0030509	BMP signaling pathway	119	-0.408133	-1.74139	0.000467768	0.00215396	0.00117223	2031	tags=27%	list=13%	signal=24%	10140/64388/6497/8321/57154/26585/23111/4093/94031/10272/6498/4487/11167/4092/2200/1958/56963/2022/1003/353500/94/23213/652/1311/4920/3077/4681/3491/860/5654/6424/6423
GO:0006289	GO:0006289	nucleotide-excision repair	107	0.411849	1.71705	0.000468019	0.00215396	0.00117223	4817	tags=48%	list=31%	signal=33%	55247/5983/83990/5984/3978/5985/5111/6119/675/2176/5426/5424/2966/5982/5425/728340/1161/5932/5433/8533/5437/142/10714/3364/5893/7515/9716/9978/5438/84464/7874/5434/1022/6117/6118/3981/7157/8451/10987/85015/4913/5431/9557/2967/10450/64708/2873/2072/27343/3150/22909
GO:0043434	GO:0043434	response to peptide hormone	358	-0.310805	-1.5027	0.000470534	0.00216059	0.00117584	2973	tags=28%	list=19%	signal=23%	64900/8837/7076/1979/9114/64506/5908/133/51043/4929/10603/6775/23175/5465/5970/9518/8615/23189/2852/6773/4149/494328/1407/2771/2170/535/107/9734/6774/55198/113/858/4790/9882/8743/2650/1154/7832/10458/56729/7010/7442/6464/28999/3586/760/1535/196883/3087/51738/301/5829/6513/8660/23433/1910/4067/3553/3727/9340/5295/445/6777/677/9564/3643/10312/3164/4303/5791/9021/7097/55022/2308/3718/857/3291/59341/…
GO:0050852	GO:0050852	T cell receptor signaling pathway	175	-0.359228	-1.61308	0.000470534	0.00216059	0.00117584	2823	tags=30%	list=18%	signal=25%	5698/1540/25/5970/3783/5788/5696/975/11119/916/5336/1997/5142/695/3117/919/9473/4790/7454/4340/11314/10384/1845/5063/84807/80381/11118/11006/9402/5293/26191/3120/55824/84433/5699/5295/920/9564/2533/3115/3937/3635/23180/80149/3113/3127/3119/3122/7070/3123/940/64332/2633
GO:0090279	GO:0090279	regulation of calcium ion import	31	-0.59453	-1.971	0.000473547	0.00217195	0.00118202	2388	tags=42%	list=16%	signal=35%	7349/51393/5311/6781/6690/5159/6347/10268/8291/5155/6348/5350/6387
GO:0001654	GO:0001654	eye development	275	-0.333481	-1.57978	0.00048221	0.00220666	0.00120091	2054	tags=22%	list=13%	signal=20%	6774/85407/118427/284217/5797/9314/6497/631/5916/6722/7275/25794/8322/8854/8829/1969/5979/10319/24147/23210/7291/340273/1028/197021/5159/6498/4094/1282/10312/6935/596/7431/57381/10848/9839/6909/1956/4814/2200/22899/1545/7070/94/155051/5156/652/7048/2737/4237/1296/3725/3624/1289/7046/2202/4212/7068/1290/1295/220/5764
GO:0043370	GO:0043370	regulation of CD4-positive	alpha-beta T cell differentiation	38	-0.55683	-1.91946	0.00048221	0.00220666	0.00120091	1927	tags=47%	list=13%	signal=42%	3071/9308/57630/84807/54440/3606/301/941/114548/604/861/3965/942/4092/3718/80149/3566/64332
GO:0032885	GO:0032885	regulation of polysaccharide biosynthetic process	33	-0.585265	-1.96324	0.000484387	0.0022141	0.00120496	1947	tags=36%	list=13%	signal=32%	4790/3037/648791/8660/5509/3643/79660/8445/5155/10580/3479/5167
GO:0044409	GO:0044409	entry into host	118	-0.401787	-1.71306	0.00049053	0.00223964	0.00121886	2516	tags=34%	list=16%	signal=29%	3956/3303/11043/975/3949/8764/8519/858/3688/4340/10475/558/3356/3685/1969/6404/1508/2621/81603/1803/1604/23601/920/941/6510/3965/942/3693/857/1956/3690/10410/3383/30835/2934/972/10581/3678/1378/4360
GO:0000578	GO:0000578	embryonic axis specification	26	0.608032	1.87892	0.000497943	0.00227091	0.00123588	4287	tags=62%	list=28%	signal=44%	5727/6491/7855/80319/57669/3234/10409/4089/6926/4435/26005/4087/6911/201164/441478/23242
GO:0002709	GO:0002709	regulation of T cell mediated immunity	52	-0.517447	-1.91758	0.000498556	0.00227114	0.001236	2580	tags=46%	list=17%	signal=39%	5788/567/975/91543/3134/7454/3106/54440/3105/3606/3107/5027/11035/3553/114548/10859/4092/3133/8809/7133/2213/3554/3077/3569
GO:0060759	GO:0060759	regulation of response to cytokine stimulus	161	-0.370284	-1.64405	0.00049928	0.00227187	0.0012364	2580	tags=27%	list=17%	signal=23%	5788/3303/7185/353376/7124/8717/3654/7132/406943/1997/6041/8996/114769/834/9314/3557/558/83666/7128/284/3656/2621/146722/54625/8877/10019/3977/861/6091/837/1435/9021/7097/857/11213/7099/972/84166/3554/6586/1893/54209/9353/3569
GO:1901653	GO:1901653	cellular response to peptide	316	-0.312698	-1.49283	0.000500845	0.00227641	0.00123887	3282	tags=31%	list=21%	signal=25%	5728/114882/5566/94056/2642/3676/10333/7040/8767/23191/406888/6714/132864/64900/8837/1979/9114/64506/5908/23641/51043/4929/10603/23175/5970/9518/8615/51274/23189/2852/4149/2771/535/107/9734/6774/55198/113/858/4790/9314/9882/1154/64127/10458/6464/28999/760/5641/1535/196883/4804/51738/23621/26191/5829/8660/23433/948/4067/3553/9340/5295/445/6777/677/9564/3643/10312/3164/4303/837/5791/10135/9021/7431…
GO:0016079	GO:0016079	synaptic vesicle exocytosis	103	0.412313	1.70299	0.000502047	0.0022793	0.00124044	2636	tags=31%	list=17%	signal=26%	90019/10814/9515/6855/6857/136/1137/5028/140730/127833/8499/8448/120892/27445/776/5582/22871/112476/815/9699/143425/6809/8541/320/23513/10497/28964/6853/51760/23025/8867/10059
GO:0051384	GO:0051384	response to glucocorticoid	117	-0.414301	-1.76295	0.000505856	0.00229401	0.00124845	1846	tags=36%	list=12%	signal=32%	3485/133522/7124/7349/387/1026/8754/3557/4129/6382/3586/5724/678/2353/301/6781/687/3176/54541/445/677/199/3490/596/2308/1956/3291/3383/5069/1843/6678/6586/54206/590/8061/2354/266743/7538/9353/387758/5743/3569
GO:0033692	GO:0033692	cellular polysaccharide biosynthetic process	58	-0.50177	-1.89761	0.000507194	0.00229749	0.00125034	2593	tags=36%	list=17%	signal=30%	55454/3340/55276/8509/8864/3037/2632/648791/3038/9572/8660/5509/3643/79660/8908/8445/84752/2134/10580/3479/5167
GO:0051293	GO:0051293	establishment of spindle localization	40	0.540333	1.8459	0.000509709	0.00230629	0.00125513	1831	tags=30%	list=12%	signal=26%	51203/1058/9700/5347/10403/4085/54908/89958/29899/3993/5080/137886
GO:0046425	GO:0046425	regulation of receptor signaling pathway via JAK-STAT	79	-0.451968	-1.81023	0.000511774	0.00231289	0.00125872	2696	tags=41%	list=18%	signal=34%	1489/3588/22876/5788/602/7124/23568/7132/6774/11314/3586/3606/83666/3059/3587/5979/5175/4067/54625/10019/958/23529/9021/3718/857/1545/1436/407006/3479/5008/3976/3569
GO:0050680	GO:0050680	negative regulation of epithelial cell proliferation	119	-0.407755	-1.73978	0.000512316	0.00231289	0.00125872	2570	tags=32%	list=17%	signal=27%	6422/567/9500/7124/574506/153090/406943/5467/22846/858/5797/406913/4804/51738/9788/58189/11221/687/28984/1028/2321/55679/6091/6347/857/7857/26471/84913/94/6678/23213/652/7421/1030/7046/5764/7057/6423
GO:0001706	GO:0001706	endoderm formation	45	-0.54608	-1.96954	0.000515491	0.00232462	0.00126511	842	tags=38%	list=6%	signal=36%	1284/3685/4318/3693/4323/2335/1291/3689/3912/3624/1289/3678/1290/1295/4313/1303/1301
GO:0006298	GO:0006298	mismatch repair	31	0.583367	1.87689	0.000516216	0.00232528	0.00126547	3630	tags=58%	list=24%	signal=44%	9156/4436/10535/2956/3978/5582/5111/6119/8313/5424/5425/4439/5395/10714/3146/4437/6117/6118
GO:0071470	GO:0071470	cellular response to osmotic stress	38	-0.556152	-1.91713	0.000519662	0.00233819	0.00127249	2006	tags=32%	list=13%	signal=28%	10367/5311/8531/825/92241/6513/677/59341/8291/4638/54206/5743
GO:0090025	GO:0090025	regulation of monocyte chemotaxis	21	-0.651337	-1.96267	0.000520335	0.00233861	0.00127272	1643	tags=48%	list=11%	signal=43%	5641/26585/4067/199/1230/1843/4681/9353/5054/6387
GO:0003417	GO:0003417	growth plate cartilage development	28	-0.600218	-1.92712	0.000522179	0.00234427	0.0012758	1769	tags=50%	list=12%	signal=44%	5916/1293/6781/302/51435/1291/64856/1292/85301/7048/1311/7373/4148/1303
GO:0070206	GO:0070206	protein trimerization	47	-0.526316	-1.90102	0.000522769	0.00234431	0.00127582	2134	tags=38%	list=14%	signal=33%	53840/10346/919/6497/197259/114904/114899/6510/114897/241/1291/972/1292/79689/114902/1277/11117/1278
GO:0060351	GO:0060351	cartilage development involved in endochondral bone morphogenesis	36	-0.56658	-1.95272	0.000532042	0.00238324	0.00129701	1769	tags=47%	list=12%	signal=42%	5916/1293/6781/302/51435/59341/1291/871/64856/1292/85301/7048/1311/1277/7373/4148/1303
GO:0006282	GO:0006282	regulation of DNA repair	118	0.397766	1.67976	0.000534489	0.00239154	0.00130153	4440	tags=48%	list=29%	signal=35%	10635/79000/2305/1111/8091/10721/57103/63979/5888/112441434/116028/8914/55135/5582/84250/2187/5111/55010/1663/8313/10459/7398/7468/1054/7336/5591/7334/1161/672/23347/10155/142/64110/55611/55137/24144/5893/7515/55183/3146/51366/51720/5429/23028/80311/6118/57332/1660/56897/7913/8451/51149/79184/84501/9400/8505/55693
GO:2000300	GO:2000300	regulation of synaptic vesicle exocytosis	66	0.468907	1.78149	0.000537278	0.00239833	0.00130522	3223	tags=36%	list=21%	signal=29%	10814/9515/6855/6857/136/1137/5028/140730/8499/120892/776/5582/22871/815/9699/143425/320/10497/28964/6853/10059/5413/148/2901
GO:1904029	GO:1904029	regulation of cyclin-dependent protein kinase activity	92	0.425272	1.72989	0.000538229	0.00239833	0.00130522	1411	tags=23%	list=9%	signal=21%	641/891/9088/995/1033/9133/9134/2810/990/1164/5347/890/993/9077/1163/899/898/5629/595/8851/219736
GO:0032652	GO:0032652	regulation of interleukin-1 production	73	-0.471546	-1.85008	0.000538388	0.00239833	0.00130522	2519	tags=45%	list=16%	signal=38%	384/3098/3315/1903/84868/1992/114769/834/64127/3586/51738/7128/301/5371/5027/2621/114548/8877/3965/22861/64581/80149/7305/1958/945/7099/140885/3428/4332/6348/54206/54209/3479
GO:0033628	GO:0033628	regulation of cell adhesion mediated by integrin	41	-0.545222	-1.91326	0.000538388	0.00239833	0.00130522	2521	tags=39%	list=16%	signal=33%	23075/916/10519/8754/3071/1969/5979/5420/83706/1803/4067/9780/1545/5328/5054/6423
GO:0050714	GO:0050714	positive regulation of protein secretion	203	-0.352949	-1.61398	0.000541788	0.00241081	0.00131201	2192	tags=35%	list=14%	signal=30%	7040/8767/382/6714/117854/7292/90550/3091/90865/135/79792/25/2746/84818/3783/2852/29126/3098/7124/5581/8764/5467/84868/8754/9501/834/399687/57555/64127/192683/3586/6810/51738/26191/8660/5027/7291/55107/28984/3553/4155/247/10631/9173/23601/114548/114899/3965/199/8447/22861/3133/7097/1956/59341/945/947/7099/7424/7096/1436/4035/6348/7043/929/3566/54209/6934/3479/5008/3569
GO:0051028	GO:0051028	mRNA transport	145	0.368235	1.60437	0.000545619	0.00242518	0.00131983	6529	tags=60%	list=43%	signal=35%	23237/55916/55706/9688/84321/10212/51692/9631/26993/129401/8480/9984/10189/55110/57122/7514/23225/5433/10762/29118/1070/4927/4686/348995/55339/10644/6428/7307/9939/22916/4116/65110/9887/64901/10921/55677/6426/2332/6427/8106/10250/1660/23511/10128/3181/10898/56943/25909/7175/55746/81929/55795/79023/23381/23279/23636/22794/2733/51362/26097/3267/6431/79902/10569/160419/84324/220988/23049/53981/57187…
GO:1903077	GO:1903077	negative regulation of protein localization to plasma membrane	20	-0.671881	-2.01541	0.000548705	0.0024362	0.00132583	1570	tags=35%	list=10%	signal=31%	8301/91461/23433/55022/1601/2633/131578
GO:0032881	GO:0032881	regulation of polysaccharide metabolic process	38	-0.555007	-1.91318	0.000557114	0.00247081	0.00134467	1947	tags=34%	list=13%	signal=30%	4790/3037/648791/8660/5509/3643/79660/8445/80183/5155/10580/3479/5167
GO:0006890	GO:0006890	retrograde vesicle-mediated transport	Golgi to endoplasmic reticulum	81	0.434931	1.73025	0.000564686	0.00250164	0.00136145	1300	tags=15%	list=8%	signal=14%	81930/11004/1062/24137/29127/3832/56992/9493/3835/3796/26153/3798
GO:1903532	GO:1903532	positive regulation of secretion by cell	312	-0.313056	-1.49713	0.00056591	0.00250431	0.0013629	2192	tags=23%	list=14%	signal=20%	8764/134957/3134/5467/84868/8618/8754/9501/834/399687/57555/64127/56729/6382/192683/9066/3586/6810/5873/5724/6386/51738/91608/26191/3684/8913/8660/5027/7291/55107/28984/3553/4155/247/2207/10631/9173/23601/6696/114548/114899/3965/114897/199/8447/22861/3133/7097/1956/59341/8792/945/947/7099/3689/7424/7096/1436/4035/6348/7043/929/3077/3566/6343/3624/8862/54209/6934/3479/5008/6387/3569
GO:0051057	GO:0051057	positive regulation of small GTPase mediated signal transduction	58	-0.498753	-1.8862	0.000567453	0.00250684	0.00136427	2144	tags=38%	list=14%	signal=33%	115727/286530/7409/9289/1902/6464/2057/3707/8660/4067/9002/10161/5159/8477/2828/6091/1435/157285/221002/9162/1281/3479
GO:0045066	GO:0045066	regulatory T cell differentiation	25	-0.637724	-2.01002	0.000568972	0.00250684	0.00136427	1627	tags=44%	list=11%	signal=39%	11006/11221/604/861/3965/10288/3559/64115/940/1378/4773
GO:0045589	GO:0045589	regulation of regulatory T cell differentiation	25	-0.637724	-2.01002	0.000568972	0.00250684	0.00136427	1627	tags=44%	list=11%	signal=39%	11006/11221/604/861/3965/10288/3559/64115/940/1378/4773
GO:0045992	GO:0045992	negative regulation of embryonic development	25	-0.637184	-2.00831	0.000568972	0.00250684	0.00136427	774	tags=32%	list=5%	signal=30%	6909/3955/23213/652/6615/1289/1290/6423
GO:1902904	GO:1902904	negative regulation of supramolecular fiber organization	118	-0.399682	-1.70409	0.000571533	0.00251537	0.00136892	2314	tags=29%	list=15%	signal=25%	3949/10519/89795/85358/832/1191/11344/80206/7114/7454/116985/51332/9535/50944/4070/150356/29767/91663/1901/57731/89927/10391/2059/90102/51474/2039/79822/1003/2934/163782/10395/11117/9353/25802
GO:0040036	GO:0040036	regulation of fibroblast growth factor receptor signaling pathway	27	-0.606116	-1.91978	0.000573868	0.00252289	0.00137301	463	tags=41%	list=3%	signal=40%	574506/2817/64094/81848/10252/23213/55959/90993/8862/860/7057
GO:0001556	GO:0001556	oocyte maturation	23	0.646934	1.94614	0.00058017	0.00254781	0.00138657	1128	tags=30%	list=7%	signal=28%	891/6790/9319/26271/4880/347688/675
GO:0014706	GO:0014706	striated muscle tissue development	293	-0.324272	-1.54069	0.000592503	0.00259661	0.00141313	2731	tags=30%	list=18%	signal=25%	57190/51676/5465/406/55897/23414/9172/283149/4534/26508/1144/3131/58529/387/2817/2260/57538/8324/9734/4209/80206/2876/64855/858/6840/3688/6497/8531/7832/55553/5997/26585/6722/2353/56603/56999/9750/50507/8854/467/7291/10611/26011/5292/7168/2702/2247/1901/8470/5159/10791/4092/4634/596/59269/10848/4000/857/6909/1958/140706/6261/26471/2022/4629/10052/64091/5239/9242/23764/5156/652/1959/7048/1634/1157…
GO:0002526	GO:0002526	acute inflammatory response	76	-0.445883	-1.77436	0.000592572	0.00259661	0.00141313	2087	tags=39%	list=14%	signal=34%	2157/695/6774/9332/2683/7442/1910/3553/2207/114548/445/1051/5359/718/6279/3133/3383/8792/26471/5733/2335/2213/54210/9180/3077/9536/5008/5743/2152/3569
GO:0046683	GO:0046683	response to organophosphorus	113	-0.403553	-1.70556	0.000601389	0.00263239	0.0014326	1984	tags=28%	list=13%	signal=25%	196/5311/1902/7299/7010/7442/6382/5724/2353/50507/3709/3784/6781/5027/50506/3553/3727/445/677/10411/2039/5322/1843/3726/7056/6678/3725/4327/8061/2354/1277/5743
GO:0000731	GO:0000731	DNA synthesis involved in DNA repair	49	0.521763	1.8533	0.000607353	0.0026556	0.00144524	3832	tags=51%	list=25%	signal=38%	51514/5983/5984/5427/5985/5111/6119/9768/10459/5426/5424/5982/5425/83932/5980/10714/5422/1032/9636/9100/5429/11201/6117/6118/56897
GO:0070098	GO:0070098	chemokine-mediated signaling pathway	49	-0.511833	-1.88334	0.000612703	0.00267445	0.00145549	2449	tags=41%	list=16%	signal=34%	2859/10519/2920/2829/2826/57007/9034/1240/10019/6091/6347/2921/1230/6351/6586/6348/6349/54209/9353/6387
GO:0070302	GO:0070302	regulation of stress-activated protein kinase signaling cascade	199	-0.347149	-1.58514	0.000613428	0.00267445	0.00145549	1930	tags=23%	list=13%	signal=20%	23043/197259/5470/3557/57630/64127/9464/1845/6386/64170/26191/8322/2122/29969/11221/4055/221472/4067/7984/3553/3082/8877/23328/9839/768211/2308/9770/1956/59341/80149/8792/344558/2213/7098/355/4609/7099/1843/140885/8325/4920/1490/3480/4616/6423
GO:0043433	GO:0043433	negative regulation of DNA-binding transcription factor activity	140	-0.377522	-1.64137	0.000613655	0.00267445	0.00145549	2383	tags=28%	list=16%	signal=24%	1611/3654/153090/10221/84868/7114/5311/9314/9464/84807/3586/2316/4792/7128/3656/6672/84875/2621/7291/5292/1240/114548/2307/4092/2099/80149/1029/26471/1545/11213/3399/84166/8553/84662/57413/56849/5740/6934/6424
GO:0007219	GO:0007219	Notch signaling pathway	164	-0.36701	-1.63408	0.000616534	0.00267869	0.0014578	2740	tags=29%	list=18%	signal=24%	113878/55897/23462/26508/182/1675/6092/63917/1903/6774/51341/64855/4855/64127/4242/406913/151636/4846/23555/4792/1840/84441/221336/8470/10631/81544/56892/604/10098/6091/51162/4854/6909/1956/64065/4323/3955/375033/157285/3559/4609/23129/7048/6615/79633/5350/406994/1272
GO:0005979	GO:0005979	regulation of glycogen biosynthetic process	26	-0.614592	-1.95712	0.000616625	0.00267869	0.0014578	1640	tags=35%	list=11%	signal=31%	648791/8660/5509/3643/79660/8445/10580/3479/5167
GO:0010962	GO:0010962	regulation of glucan biosynthetic process	26	-0.614592	-1.95712	0.000616625	0.00267869	0.0014578	1640	tags=35%	list=11%	signal=31%	648791/8660/5509/3643/79660/8445/10580/3479/5167
GO:0050766	GO:0050766	positive regulation of phagocytosis	57	-0.500619	-1.88983	0.000618553	0.00268417	0.00146078	2580	tags=49%	list=17%	signal=41%	5788/7124/721/55198/3071/399687/3601/720/4240/5873/1535/7275/717/2621/948/3553/146722/2207/718/6347/64581/1794/6556/2213/140885/11031/4035/54209
GO:0001776	GO:0001776	leukocyte homeostasis	71	-0.466286	-1.81924	0.000624402	0.00270664	0.00147301	2189	tags=38%	list=14%	signal=33%	83700/1880/5142/30061/3071/558/202309/3707/7128/301/5293/10673/5027/11035/4067/2207/6498/10019/3965/10312/596/3718/55619/139818/3559/972/3569
GO:0033619	GO:0033619	membrane protein proteolysis	54	-0.497769	-1.86273	0.000631997	0.00273661	0.00148932	2029	tags=39%	list=13%	signal=34%	7076/29763/5970/7124/8754/4790/25825/3586/4804/23621/5979/5027/3553/4627/257364/1512/8728/7077/7133/152503/7078
GO:0005978	GO:0005978	glycogen biosynthetic process	40	-0.553662	-1.93424	0.000634082	0.00273975	0.00149103	1645	tags=35%	list=11%	signal=31%	55276/8864/2632/648791/9572/8660/5509/3643/79660/8908/8445/10580/3479/5167
GO:0009250	GO:0009250	glucan biosynthetic process	40	-0.553662	-1.93424	0.000634082	0.00273975	0.00149103	1645	tags=35%	list=11%	signal=31%	55276/8864/2632/648791/9572/8660/5509/3643/79660/8908/8445/10580/3479/5167
GO:0000729	GO:0000729	DNA double-strand break processing	23	0.644337	1.93833	0.000634988	0.00274073	0.00149156	3558	tags=65%	list=23%	signal=50%	641/83990/580/7336/7334/5932/1763/672/548593/5893/79008/55218/4361/84464/4683
GO:0097300	GO:0097300	programmed necrotic cell death	40	-0.551824	-1.92782	0.000653443	0.00281736	0.00153327	2969	tags=42%	list=19%	signal=34%	8837/148022/1540/353376/7124/197259/8531/11035/5836/23643/857/253430/7098/355/7099/929/407006
GO:0006898	GO:0006898	receptor-mediated endocytosis	207	-0.343263	-1.57031	0.000655573	0.00282352	0.00153662	2605	tags=30%	list=17%	signal=25%	22876/10266/8542/4037/567/10267/8301/975/88455/3949/26052/1759/10188/5336/1191/9332/858/3688/9863/10203/23208/57007/9260/26585/6386/284/3684/948/201176/6616/54413/2207/8578/10859/3339/3643/81035/718/302/10268/8029/4481/857/3690/2213/3689/11031/6678/1601/7048/4035/929/3077/8862/23166/2210/4360/5054/22925/2209/6424/2350
GO:0070555	GO:0070555	response to interleukin-1	169	-0.36546	-1.63229	0.000657319	0.00282802	0.00153907	2669	tags=26%	list=17%	signal=22%	5970/4615/6422/4215/7316/5696/81792/2113/3654/153090/4790/3037/3557/64127/2635/1535/4792/9572/301/3656/57161/3176/3553/5699/1051/3965/6347/80149/1958/3383/8792/11213/6351/2634/140885/11173/3554/1326/6348/6349/10365/5740/2633/3569
GO:0001763	GO:0001763	morphogenesis of a branching structure	162	-0.365122	-1.62347	0.000662397	0.00284465	0.00154812	1671	tags=25%	list=11%	signal=22%	3586/6722/4070/8829/1969/64412/5371/54922/2119/2246/2247/3082/1512/1282/1522/2099/1435/596/9021/4323/2022/4609/5228/3371/23129/10252/23213/652/7048/2737/7421/255743/79633/6943/80000/6608/170690/9353/2252/6423
GO:0014911	GO:0014911	positive regulation of smooth muscle cell migration	40	-0.551687	-1.92734	0.000663124	0.00284465	0.00154812	2022	tags=45%	list=13%	signal=39%	9732/3037/1902/50507/8829/10631/5159/4303/199/596/8013/5155/9510/4035/80310/407006/8840/3479
GO:0051493	GO:0051493	regulation of cytoskeleton organization	480	-0.285095	-1.40796	0.000663305	0.00284465	0.00154812	2313	tags=24%	list=15%	signal=21%	10519/89795/5581/85358/832/824/391/83700/3611/9948/10763/11344/80206/7114/9647/10095/3071/7454/23187/55243/4130/1902/116985/10458/5063/683/51332/60312/7010/9886/9535/6624/10435/55616/128272/2316/10769/3059/9037/100653515/50944/397/4070/50507/8829/9912/5829/5027/23433/29767/10174/22998/91663/7984/28984/7168/388/22836/1901/171024/5159/57731/390/5295/27/22924/8477/58480/148170/89927/29109/10411/1039…
GO:0048568	GO:0048568	embryonic organ development	340	-0.30969	-1.48628	0.00067226	0.00287926	0.00156695	1581	tags=20%	list=10%	signal=18%	5333/22846/5311/113026/26018/9464/5916/80736/3586/6722/91461/9750/8854/1969/9645/7291/25861/3203/9935/1028/2702/10370/3216/6886/1051/579/10019/677/4487/6935/9021/10848/6909/1956/2200/4323/2487/2022/8013/3399/3726/115908/50515/51294/5156/2034/652/7048/5155/2737/4237/4920/6615/7043/6943/6343/6608/3200/7046/2202/5919/3491/860/1290/220/1301/3976
GO:0007260	GO:0007260	tyrosine phosphorylation of STAT protein	52	-0.510764	-1.89282	0.000672804	0.00287926	0.00156695	1656	tags=46%	list=11%	signal=41%	1489/22876/7124/23568/7132/6774/3606/83666/3059/5175/4067/54625/10019/958/23529/9021/3718/857/1436/407006/3479/5008/3976/3569
GO:0007608	GO:0007608	sensory perception of smell	84	0.43868	1.74456	0.000675547	0.00288793	0.00157167	5491	tags=60%	list=36%	signal=38%	390538/341359/441669/4995/729759/343171/391190/26531/4975/391192/390323/390037/391112/282763/127062/341152/8195/442191/4991/219982/285659/26533/391191/81099/219981/26246/127623/390199/120793/127064/119682/391211/390036/79549/390264/125963/8383/162998/219447/390882/26693/26664/390445/26245/26333/390093/26689/284433/130507/1258
GO:0097242	GO:0097242	amyloid-beta clearance	30	-0.596597	-1.95955	0.000689582	0.0029448	0.00160262	2459	tags=53%	list=16%	signal=45%	8301/728/7124/3949/1191/6722/3684/948/3643/718/4481/3689/4035/4038/54209/3480
GO:0043414	GO:0043414	macromolecule methylation	272	0.316805	1.48265	0.000690804	0.0029469	0.00160376	5979	tags=49%	list=39%	signal=30%	140690/54069/91646/285051/2146/1789/113802/57673/79823/79723/635/2625/64863/79447/26147/55170/3720/5110/200424/7468/54880/4839/4089/93587/51605/29960/9836/10419/64783/79624/79813/672/23512/10155/4552/6894/142/6634/83640/9646/94104/54931/79609/11105/51603/84661/6628/54093/55011/1786/91893/55183/110599564/11022/260294/3276/4602/6839/51106/196074/10919/9739/8726/56950/22976/23028/55677/80312/79066/2…
GO:0016064	GO:0016064	immunoglobulin mediated immune response	91	-0.427329	-1.74391	0.000708079	0.00301469	0.00164066	2609	tags=46%	list=17%	signal=39%	54537/10875/2067/5788/23075/602/7124/975/200558/3426/721/10538/1191/695/5452/720/3586/202309/717/1604/2207/604/10312/718/716/958/8741/3133/715/23529/3635/2213/3119/714/713/972/710/730/712/3566/940/1378
GO:0050953	GO:0050953	sensory perception of light stimulus	127	-0.390689	-1.67744	0.000708193	0.00301469	0.00164066	2048	tags=28%	list=13%	signal=24%	93589/6101/3299/64072/3913/7439/3801/285440/6314/5470/7299/3983/25794/4070/10319/768206/25861/197021/2743/54437/10052/1545/155051/7045/4942/2034/2070/4060/7078/83872/1277/9249/2202/6004/1301
GO:0060536	GO:0060536	cartilage morphogenesis	21	-0.643032	-1.93764	0.000712819	0.00303117	0.00164963	1799	tags=57%	list=12%	signal=50%	9464/1293/6781/4487/51435/1291/64856/1292/6615/7373/4148/1303
GO:1904894	GO:1904894	positive regulation of receptor signaling pathway via STAT	56	-0.493706	-1.8642	0.000714995	0.0030345	0.00165144	2418	tags=46%	list=16%	signal=39%	1489/3588/7124/23568/7132/6774/11314/4249/3586/3606/83666/3059/3587/5175/4067/54625/958/23529/9021/1545/1436/407006/3479/5008/3976/3569
GO:2000106	GO:2000106	regulation of leukocyte apoptotic process	70	-0.461156	-1.80371	0.000715108	0.0030345	0.00165144	1821	tags=36%	list=12%	signal=32%	64127/558/84807/3586/3707/3059/301/5293/81704/8660/5027/2621/11035/4067/2207/155038/10859/604/3965/3718/1029/8013/972/652/6387
GO:0061005	GO:0061005	cell differentiation involved in kidney development	45	-0.539991	-1.94758	0.000717828	0.00304284	0.00165598	1841	tags=36%	list=12%	signal=31%	9863/28999/9788/5420/4318/2828/947/652/5155/2737/59/79633/84662/6943/6608/3976
GO:0001959	GO:0001959	regulation of cytokine-mediated signaling pathway	150	-0.372283	-1.64998	0.000722453	0.00305922	0.00166489	2580	tags=27%	list=17%	signal=23%	5788/3303/7185/353376/7124/8717/3654/7132/406943/1997/6041/8996/114769/834/3557/558/83666/7128/284/3656/2621/146722/54625/8877/10019/3977/861/6091/837/1435/9021/857/11213/972/84166/3554/6586/1893/54209/9353/3569
GO:0051236	GO:0051236	establishment of RNA localization	189	0.347184	1.56831	0.000729957	0.00308775	0.00168042	6529	tags=60%	list=43%	signal=35%	23237/55916/55706/9688/23212/84321/10212/51692/54715/9631/26993/9793/129401/8480/9984/10189/6741/7263/55110/57122/7514/23225/5433/57510/10762/5901/29118/1070/4927/4686/348995/54439/55339/10644/6421/6428/7307/9939/22916/4116/65110/9887/64901/10921/55677/6426/2332/6427/54847/8106/10250/1660/51808/23511/10128/3181/10898/7013/56943/55781/25909/64062/84946/7175/87178/55746/81929/55795/79023/23381/2327…
GO:0034637	GO:0034637	cellular carbohydrate biosynthetic process	70	-0.460675	-1.80183	0.000733562	0.00309974	0.00168694	2593	tags=33%	list=17%	signal=27%	55454/3340/55276/8509/8864/3037/2683/2632/648791/3038/9572/6513/8660/5509/3643/79660/8908/8445/84752/2134/10580/3479/5167
GO:0060143	GO:0060143	positive regulation of syncytium formation by plasma membrane fusion	20	-0.664575	-1.9935	0.000768181	0.00324263	0.00176471	3138	tags=70%	list=21%	signal=56%	30846/2323/8536/9518/824/8754/9750/963/10411/7305/10938/3566/54209/4773
GO:0046427	GO:0046427	positive regulation of receptor signaling pathway via JAK-STAT	54	-0.492665	-1.84363	0.000771332	0.00325252	0.00177009	2696	tags=46%	list=18%	signal=38%	1489/3588/7124/23568/7132/6774/11314/3586/3606/83666/3059/3587/5175/4067/54625/958/23529/9021/1545/1436/407006/3479/5008/3976/3569
GO:0016572	GO:0016572	histone phosphorylation	33	0.565541	1.83802	0.000776206	0.00326965	0.00177941	2707	tags=36%	list=18%	signal=30%	891/9212/983/6790/1111/890/8091/7443/26993/9252/1017/6795
GO:0030856	GO:0030856	regulation of epithelial cell differentiation	113	-0.398247	-1.68313	0.000778019	0.00327386	0.0017817	1370	tags=25%	list=9%	signal=23%	9294/4318/5920/3553/1028/247/1051/677/861/6935/7122/9839/857/2487/84913/1003/94/23764/1513/652/7421/79633/54206/6608/7538/5054/6424/3976
GO:0030308	GO:0030308	negative regulation of cell growth	160	-0.366369	-1.62917	0.000783574	0.00329379	0.00179255	1660	tags=21%	list=11%	signal=19%	56920/5997/6405/23111/323/9037/8829/5371/58189/123879/11007/6696/604/4487/54437/596/10501/1029/2487/223117/684/623/94/8482/147906/85004/6586/2273/5270/3624/9353/5167/5999/6423
GO:0051592	GO:0051592	response to calcium ion	126	-0.391239	-1.67221	0.000785614	0.00329892	0.00179534	2222	tags=30%	list=15%	signal=26%	107/221184/8754/22872/5311/23208/6382/9066/5641/825/3707/10156/2353/5027/6529/144402/3727/311/10628/100271927/241/857/1956/3778/6261/2039/308/1843/3726/7226/6678/3725/1800/140576/7220/2354/9536/7057
GO:0050657	GO:0050657	nucleic acid transport	186	0.34552	1.56119	0.000790352	0.00331191	0.00180241	6529	tags=60%	list=43%	signal=35%	23237/55916/55706/9688/23212/84321/10212/51692/54715/9631/26993/9793/129401/8480/9984/10189/6741/7263/55110/57122/7514/23225/5433/57510/10762/5901/29118/1070/4927/4686/348995/54439/55339/10644/6421/6428/7307/9939/22916/4116/65110/9887/64901/10921/55677/6426/2332/6427/54847/8106/10250/1660/51808/23511/10128/3181/10898/56943/55781/25909/64062/84946/7175/87178/55746/81929/55795/79023/23381/23279/236…
GO:0050658	GO:0050658	RNA transport	186	0.34552	1.56119	0.000790352	0.00331191	0.00180241	6529	tags=60%	list=43%	signal=35%	23237/55916/55706/9688/23212/84321/10212/51692/54715/9631/26993/9793/129401/8480/9984/10189/6741/7263/55110/57122/7514/23225/5433/57510/10762/5901/29118/1070/4927/4686/348995/54439/55339/10644/6421/6428/7307/9939/22916/4116/65110/9887/64901/10921/55677/6426/2332/6427/54847/8106/10250/1660/51808/23511/10128/3181/10898/56943/55781/25909/64062/84946/7175/87178/55746/81929/55795/79023/23381/23279/236…
GO:0050709	GO:0050709	negative regulation of protein secretion	110	-0.405646	-1.70996	0.000791191	0.00331198	0.00180245	2570	tags=35%	list=17%	signal=29%	6422/90007/384/7124/1113/64285/91543/933/27202/9734/7114/1992/114769/23208/3586/51738/5552/7128/301/284/26191/5371/2615/2621/28984/3553/114548/114899/10859/131450/80149/2335/2213/308/947/353500/2633/284297
GO:0007272	GO:0007272	ensheathment of neurons	113	-0.39784	-1.68141	0.000794841	0.00332036	0.00180701	2189	tags=27%	list=14%	signal=23%	83700/3611/1191/5467/6497/7038/1902/5916/10397/5660/26011/4155/1890/83742/7851/3082/8530/7097/5376/10810/7133/11202/23136/84668/23114/1959/10100/3400/287/5764
GO:0008366	GO:0008366	axon ensheathment	113	-0.39784	-1.68141	0.000794841	0.00332036	0.00180701	2189	tags=27%	list=14%	signal=23%	83700/3611/1191/5467/6497/7038/1902/5916/10397/5660/26011/4155/1890/83742/7851/3082/8530/7097/5376/10810/7133/11202/23136/84668/23114/1959/10100/3400/287/5764
GO:0030206	GO:0030206	chondroitin sulfate biosynthetic process	23	-0.629925	-1.95434	0.000803004	0.00334921	0.00182271	2739	tags=70%	list=18%	signal=57%	337876/55454/54480/29940/56548/7358/9469/51363/22856/79586/64131/1462/633/50515/1634/1464
GO:0032872	GO:0032872	regulation of stress-activated MAPK cascade	197	-0.34323	-1.56439	0.00080341	0.00334921	0.00182271	1930	tags=22%	list=13%	signal=20%	23043/197259/5470/3557/57630/64127/9464/1845/6386/64170/26191/8322/2122/29969/11221/4055/221472/7984/3553/3082/8877/23328/9839/768211/2308/9770/1956/59341/80149/8792/344558/2213/7098/355/4609/7099/1843/140885/8325/4920/1490/3480/4616/6423
GO:0043010	GO:0043010	camera-type eye development	239	-0.325951	-1.51532	0.000805542	0.00335462	0.00182565	1960	tags=21%	list=13%	signal=19%	284217/5797/9314/6497/631/5916/6722/7275/8322/8854/8829/1969/5979/10319/24147/23210/7291/1028/197021/5159/6498/4094/1282/10312/6935/7431/57381/10848/9839/6909/1956/4814/2200/22899/1545/7070/94/155051/5156/652/7048/2737/1296/3725/3624/7046/2202/7068/1295/220/5764
GO:0048706	GO:0048706	embryonic skeletal system development	94	-0.423277	-1.74578	0.000829506	0.00345085	0.00187802	1323	tags=21%	list=9%	signal=20%	7291/3203/3216/579/6935/64131/4323/50515/5156/23213/652/7048/2737/55959/7043/1277/3200/7046/860/1301
GO:0010257	GO:0010257	NADH dehydrogenase complex assembly	64	0.470086	1.77486	0.000835059	0.00346425	0.00188532	5907	tags=61%	list=39%	signal=38%	4541/4701/55572/29078/4729/4726/29090/4704/55744/4695/4700/4706/4712/4709/4710/617/4707/90871/137682/4728/55967/4715/4718/5018/4724/55471/91942/4696/55101/4711/4725/4702/4716/55863/4722/51079/4720/4698/4719
GO:0032981	GO:0032981	mitochondrial respiratory chain complex I assembly	64	0.470086	1.77486	0.000835059	0.00346425	0.00188532	5907	tags=61%	list=39%	signal=38%	4541/4701/55572/29078/4729/4726/29090/4704/55744/4695/4700/4706/4712/4709/4710/617/4707/90871/137682/4728/55967/4715/4718/5018/4724/55471/91942/4696/55101/4711/4725/4702/4716/55863/4722/51079/4720/4698/4719
GO:0046328	GO:0046328	regulation of JNK cascade	159	-0.363203	-1.61288	0.000835308	0.00346425	0.00188532	1930	tags=22%	list=13%	signal=19%	23043/197259/5470/3557/57630/64127/1845/6386/64170/26191/8322/2122/29969/11221/4055/221472/7984/3553/23328/9839/9770/1956/59341/8792/344558/2213/7098/7099/140885/8325/4920/1490/3480/4616/6423
GO:0060428	GO:0060428	lung epithelium development	26	-0.604477	-1.9249	0.000839163	0.00347666	0.00189207	384	tags=23%	list=3%	signal=23%	652/57333/54206/10365/7068/2252
GO:0072395	GO:0072395	signal transduction involved in cell cycle checkpoint	72	0.457962	1.76735	0.000840682	0.00347937	0.00189355	259	tags=17%	list=2%	signal=16%	891/995/1869/983/6790/144455/2810/1111/51512/51514/5347/79733
GO:0035023	GO:0035023	regulation of Rho protein signal transduction	127	-0.389206	-1.67107	0.000843085	0.00348573	0.00189701	2196	tags=31%	list=14%	signal=27%	143872/57449/89846/286530/3688/7409/83892/9289/1902/128272/389337/2245/397/9750/8829/54922/9828/221472/7984/9002/10161/5159/27/8477/604/2828/6091/2059/152273/115557/80243/9459/22899/157285/25959/55160/10395/50649/57493/1281
GO:0030511	GO:0030511	positive regulation of transforming growth factor beta receptor signaling pathway	26	-0.604023	-1.92346	0.000848435	0.00350067	0.00190514	2135	tags=35%	list=14%	signal=30%	7041/8516/6386/1028/10370/1601/255743/1030/7057
GO:1903846	GO:1903846	positive regulation of cellular response to transforming growth factor beta stimulus	26	-0.604023	-1.92346	0.000848435	0.00350067	0.00190514	2135	tags=35%	list=14%	signal=30%	7041/8516/6386/1028/10370/1601/255743/1030/7057
GO:1903522	GO:1903522	regulation of blood circulation	227	-0.332778	-1.53275	0.000850181	0.00350428	0.0019071	2414	tags=27%	list=16%	signal=23%	1113/60598/7349/1756/387/6324/10699/3269/2548/143872/5142/4882/8864/9732/3762/7442/3356/4846/2316/5997/5724/51738/3709/8913/3784/6781/6915/3274/7168/2702/57731/4092/4634/857/6909/1956/3751/80149/3383/6261/10052/2775/64091/55328/147/1839/1636/2034/3759/10008/1490/57413/7220/287/8862/7068/5350/27129/5743/5348/5999
GO:0002335	GO:0002335	mature B cell differentiation	22	-0.630338	-1.93595	0.000854988	0.0035181	0.00191462	2516	tags=59%	list=16%	signal=49%	3956/602/56833/5336/1880/9452/5452/4242/112616/55619/3955/139818/2213
GO:0034762	GO:0034762	regulation of transmembrane transport	429	-0.288585	-1.41293	0.000855282	0.0035181	0.00191462	3282	tags=33%	list=21%	signal=27%	5728/6236/114882/400916/54800/196527/5566/3750/4205/65018/65266/7040/2745/3764/2946/100507537/6786/114898/6332/610/538/57165/79026/2280/817/30818/259232/9368/25/25932/967/56479/57190/130497/93589/1909/2852/57520/8682/481/3755/23072/2859/7124/60598/1756/1389/2902/6324/5581/85358/51422/1612/5336/10550/9948/5142/81/6041/9481/8864/7114/6253/55198/23479/5311/3762/84329/57555/1318/81831/3790/54102/2899…
GO:0034377	GO:0034377	plasma lipoprotein particle assembly	20	0.652883	1.88752	0.000859113	0.00353025	0.00192124	1750	tags=45%	list=11%	signal=40%	336/344/341/346/335/10347/2181/55937/5326
GO:0030832	GO:0030832	regulation of actin filament length	158	-0.3671	-1.62755	0.000872126	0.00358007	0.00194835	3258	tags=36%	list=21%	signal=29%	6712/50853/23406/6711/2017/11078/23191/11034/382/64857/8440/146206/653857/23189/10109/23075/7408/51466/387/5581/832/9948/11344/80206/7114/10095/3071/7454/55243/10458/5063/51332/9886/9535/10435/3059/9037/29767/91663/57731/148170/3055/2059/10602/51474/3383/5341/2039/79822/11135/2934/163782/93663/2006/9353/6387/25802
GO:0071347	GO:0071347	cellular response to interleukin-1	148	-0.36991	-1.63653	0.000881761	0.00361328	0.00196643	2669	tags=26%	list=17%	signal=21%	5970/4615/6422/4215/7316/5696/81792/3654/153090/4790/3037/3557/64127/2635/4792/9572/3656/57161/3553/5699/1051/6347/80149/1958/3383/11213/6351/2634/140885/11173/3554/1326/6348/6349/10365/5740/2633/3569
GO:0052126	GO:0052126	movement in host environment	141	-0.3717	-1.62564	0.000882011	0.00361328	0.00196643	2516	tags=29%	list=16%	signal=25%	3956/3303/11043/975/3949/8764/8519/858/3688/4340/10475/558/3356/3685/1969/6404/5371/1508/2621/81603/1803/1604/23601/920/941/6510/3965/942/3693/857/1956/3690/10410/3383/30835/2934/972/10581/3678/1378/4360
GO:1903557	GO:1903557	positive regulation of tumor necrosis factor superfamily cytokine production	74	-0.453566	-1.79391	0.000915814	0.00374795	0.00203972	2318	tags=38%	list=15%	signal=32%	9261/3315/26137/1191/84868/64127/54440/1535/5724/64170/948/7291/2207/5295/23643/3965/942/3133/7097/64581/7305/7098/7099/1536/7096/6348/929/7057
GO:0060632	GO:0060632	regulation of microtubule-based movement	23	0.634356	1.90831	0.000918217	0.00375397	0.00204299	3030	tags=48%	list=20%	signal=38%	56683/25893/80128/92749/55036/55130/254263/4133/255758/126731/8195
GO:0002474	GO:0002474	antigen processing and presentation of peptide antigen via MHC class I	91	-0.422902	-1.72584	0.000927353	0.00378748	0.00206122	2823	tags=33%	list=18%	signal=27%	5698/6891/10484/64167/10437/55080/3140/567/6396/5696/4688/3134/22872/3106/3105/1535/3685/3107/948/9871/5699/2207/4689/3133/3693/1536/1636/3077/2210/2209
GO:0046928	GO:0046928	regulation of neurotransmitter secretion	89	0.405029	1.63879	0.000930587	0.00379343	0.00206447	2636	tags=28%	list=17%	signal=23%	10814/9515/6855/6857/136/1137/5028/140730/8499/120892/776/5582/22871/3749/815/9699/55607/143425/320/10497/28964/6853/23025/8938/10059
GO:0043537	GO:0043537	negative regulation of blood vessel endothelial cell migration	38	-0.541342	-1.86607	0.000931638	0.00379343	0.00206447	2407	tags=39%	list=16%	signal=33%	574506/387/406943/22846/9314/161742/6915/28984/2247/79812/285/94/407006/406994/7057
GO:0097064	GO:0097064	ncRNA export from nucleus	38	0.530666	1.79666	0.000931638	0.00379343	0.00206447	6151	tags=79%	list=40%	signal=47%	55706/9688/9631/129401/8480/6741/57122/23225/10762/5901/4927/348995/22916/51808/23511/7175/55746/81929/79023/23279/23636/79902/7248/4869/23165/8086/53371/11097/4928/9972
GO:0001914	GO:0001914	regulation of T cell mediated cytotoxicity	22	-0.628515	-1.93035	0.000942928	0.00383553	0.00208738	3226	tags=59%	list=21%	signal=47%	8417/912/5788/567/3134/3106/3105/3107/5027/11035/10859/3133/2213
GO:0090305	GO:0090305	nucleic acid phosphodiester bond hydrolysis	269	0.314614	1.46971	0.000950409	0.00386206	0.00210181	4923	tags=46%	list=32%	signal=32%	9156/84072/146956/2237/5983/79915/79605/5984/3148/10799/10535/23212/5985/5111/81691/6119/92667/51692/64789/3669/57697/5810/5426/51728/9937/196513/28960/5896/5424/129563/1479/2966/5982/5425/23405/5932/56941/114034/64858/5395/55775/1763/55651/348654/112479/1478/317/84083/10556/116461/283989/142/4686/57472/79703/5980/57455/10714/548593/55728/1776/246243/10775/51010/1775/79869/65080/29102/10595/16722…
GO:0032760	GO:0032760	positive regulation of tumor necrosis factor production	72	-0.446814	-1.75438	0.000959138	0.0038936	0.00211898	2318	tags=38%	list=15%	signal=32%	9261/3315/26137/1191/84868/64127/54440/1535/5724/64170/948/7291/2207/5295/23643/3965/3133/7097/64581/7305/7098/7099/1536/7096/6348/929/7057
GO:0038061	GO:0038061	NIK/NF-kappaB signaling	154	-0.360139	-1.60031	0.000964079	0.00390971	0.00212775	2487	tags=28%	list=16%	signal=24%	10725/602/7124/5696/8717/387/3654/406919/9966/3611/81/84868/7114/8996/51564/64127/3606/4792/26191/9020/3987/11035/3553/5699/114548/114899/56892/8877/3965/23328/7097/9770/1956/80149/8809/55075/7098/7099/1896/51284/929/54209/4306
GO:0071772	GO:0071772	response to BMP	127	-0.387818	-1.66511	0.000968342	0.00391857	0.00213257	2031	tags=26%	list=13%	signal=23%	10140/64388/6497/8321/57154/26585/23111/4093/94031/10272/6498/4487/11167/4092/2200/1958/56963/2022/1003/353500/11173/94/23213/652/1311/4920/3077/4681/3491/860/5654/6424/6423
GO:0071773	GO:0071773	cellular response to BMP stimulus	127	-0.387818	-1.66511	0.000968342	0.00391857	0.00213257	2031	tags=26%	list=13%	signal=23%	10140/64388/6497/8321/57154/26585/23111/4093/94031/10272/6498/4487/11167/4092/2200/1958/56963/2022/1003/353500/11173/94/23213/652/1311/4920/3077/4681/3491/860/5654/6424/6423
GO:0051145	GO:0051145	smooth muscle cell differentiation	58	-0.487905	-1.84518	0.000969182	0.00391857	0.00213257	3162	tags=38%	list=21%	signal=30%	7040/6648/7422/133/4772/55897/23462/2852/10266/8516/6722/1910/79652/6935/4303/2022/652/5155/1311/255743/407006/4773
GO:0002369	GO:0002369	T cell cytokine production	29	-0.581022	-1.89542	0.000982013	0.00396025	0.00215525	2520	tags=55%	list=16%	signal=46%	567/975/91543/3134/54440/3606/1604/3553/114548/4092/6556/8809/7133/3554/3077/3569
GO:0070873	GO:0070873	regulation of glycogen metabolic process	31	-0.576844	-1.91237	0.000982308	0.00396025	0.00215525	1640	tags=32%	list=11%	signal=29%	648791/8660/5509/3643/79660/8445/80183/10580/3479/5167
GO:1901976	GO:1901976	regulation of cell cycle checkpoint	31	0.570866	1.83667	0.000982441	0.00396025	0.00215525	2213	tags=42%	list=14%	signal=36%	891/10403/84101/4085/79968/81620/7517/5629/11200/9984/55159/348654/54465
GO:0070265	GO:0070265	necrotic cell death	48	-0.515609	-1.87311	0.000990288	0.00398789	0.00217029	3304	tags=44%	list=22%	signal=34%	706/3661/8837/148022/1540/353376/7124/7349/8996/197259/8531/11035/5836/23643/857/253430/7098/355/7099/929/407006
GO:0099504	GO:0099504	synaptic vesicle cycle	163	0.349854	1.55633	0.0010008	0.00402621	0.00219115	2636	tags=26%	list=17%	signal=22%	90019/10814/9515/6855/6857/136/1137/5028/29993/9378/140730/127833/8499/8448/120892/8224/27445/7054/9829/776/9024/5582/22871/112476/8851/815/1000/9699/143425/6809/8541/320/23513/10497/57706/28964/6853/51760/23025/8867/1056/10059
GO:0003014	GO:0003014	renal system process	91	-0.421773	-1.72124	0.00101917	0.00409209	0.002227	2940	tags=40%	list=19%	signal=32%	1312/360/133/9368/135/2771/387/10699/107/10916/113/3037/7442/5660/5641/1535/196883/3784/6781/2621/1910/66002/2702/4162/10391/596/3291/3778/6446/947/2934/115/23213/652/5155/55959
GO:0009636	GO:0009636	response to toxic substance	433	-0.283903	-1.39201	0.00101921	0.00409209	0.002227	2106	tags=21%	list=14%	signal=18%	9734/2876/1026/6774/113/8754/196/84557/4790/9314/80854/5831/4129/6382/558/3586/5660/4846/5997/6722/7128/2353/301/3709/6915/2878/948/11035/4067/9429/50506/6529/388/4155/5159/5153/3048/3082/445/8877/5742/4487/2059/10628/6279/6688/596/7097/241/2308/55364/80149/1958/3383/3778/26471/6001/8013/1545/2775/493869/6351/1536/1843/140885/3371/2934/761/7226/6678/11185/125336/1145/5155/114757/6649/6348/80310/9…
GO:0044264	GO:0044264	cellular polysaccharide metabolic process	84	-0.435402	-1.7767	0.00102928	0.00412841	0.00224677	2447	tags=35%	list=16%	signal=29%	55454/3340/55276/8509/51422/8987/2548/313/8864/3037/4126/2632/648791/3038/9572/8660/5509/5836/3643/79660/8908/8445/80183/84752/51294/2134/10580/3479/5167
GO:0051281	GO:0051281	positive regulation of release of sequestered calcium ion into cytosol	28	-0.583967	-1.87495	0.0010306	0.0041296	0.00224741	1976	tags=43%	list=13%	signal=37%	2946/25/2852/5311/825/9002/187/7070/623/7220/57214/57158
GO:0042276	GO:0042276	error-prone translesion synthesis	20	0.648069	1.8736	0.00103238	0.0041326	0.00224905	3630	tags=65%	list=24%	signal=50%	5983/5984/5427/5985/5111/6119/10459/5982/5980/5429/11201/6117/6118
GO:0038066	GO:0038066	p38MAPK cascade	41	-0.525934	-1.84557	0.00104446	0.00417679	0.0022731	2522	tags=46%	list=16%	signal=39%	4215/5187/9261/153090/9464/26191/5606/11221/3553/3082/8877/677/3965/23328/768211/80149/1843/7538/4616
GO:0019724	GO:0019724	B cell mediated immunity	92	-0.425951	-1.74253	0.00105963	0.00423327	0.00230383	2609	tags=46%	list=17%	signal=38%	54537/10875/2067/5788/23075/602/7124/975/200558/3426/721/10538/1191/695/5452/720/3586/202309/717/1604/2207/604/10312/718/716/958/8741/3133/715/23529/3635/2213/3119/714/713/972/710/730/712/3566/940/1378
GO:0010038	GO:0010038	response to metal ion	296	-0.313837	-1.4919	0.00106227	0.00423961	0.00230728	2033	tags=22%	list=13%	signal=20%	113/8754/22872/84557/5311/30061/84329/91252/23208/4129/6284/6382/9066/10397/760/5641/825/3707/10156/23621/2353/8913/5027/4318/10272/6529/144402/3727/445/311/10312/10628/6279/596/100271927/241/857/1956/3383/3778/6261/2039/79901/308/1536/1843/3726/2934/7226/6678/6649/4017/1740/929/712/3725/3077/1800/140576/7220/2354/9536/5350/387758/5743/7057
GO:0032613	GO:0032613	interleukin-10 production	44	-0.521235	-1.85609	0.00108369	0.00432082	0.00235148	1828	tags=48%	list=12%	signal=42%	29126/602/28951/9308/64127/54440/2207/3082/10859/3965/7097/3718/64581/7305/2213/947/7099/80380/64115/940/54209
GO:0070570	GO:0070570	regulation of neuron projection regeneration	28	-0.579909	-1.86192	0.00108733	0.00433105	0.00235705	1099	tags=43%	list=7%	signal=40%	22876/2896/9314/6696/3082/8578/56963/11202/7070/4035/407006/5764
GO:0031124	GO:0031124	mRNA 3'-end processing	96	0.405552	1.65734	0.00111399	0.00443284	0.00241244	6661	tags=64%	list=44%	signal=36%	891/580/84321/10212/51692/9984/6626/10189/1479/55110/55197/5433/55149/1477/1478/4686/9646/55339/79869/6428/25888/7307/9939/22916/4116/10921/6426/6427/8106/10250/23283/10898/7936/56254/64852/10914/87178/2926/123169/22794/51362/904/26097/6431/10569/84324/53981/22828/57187/65109/7884/9295/64895/199746/79882/80336/6430/84271/23248/7919/351
GO:0032620	GO:0032620	interleukin-17 production	26	-0.596133	-1.89833	0.00112752	0.00448226	0.00243934	3162	tags=62%	list=21%	signal=49%	7040/406888/7292/51043/3140/4615/384/3071/64127/3606/8877/23180/7099/64115/5008/3569
GO:1900117	GO:1900117	regulation of execution phase of apoptosis	27	-0.591485	-1.87344	0.00113495	0.00450734	0.00245299	730	tags=19%	list=5%	signal=18%	80149/10395/2191/5740/3569
GO:0048704	GO:0048704	embryonic skeletal system morphogenesis	69	-0.451542	-1.76652	0.00113714	0.00451157	0.00245529	1323	tags=22%	list=9%	signal=20%	7291/3203/3216/6935/4323/50515/5156/652/7048/2737/7043/3200/7046/860/1301
GO:0090596	GO:0090596	sensory organ morphogenesis	182	-0.339624	-1.52733	0.00114324	0.00453133	0.00246604	2114	tags=23%	list=14%	signal=20%	8516/6774/85407/118427/5797/6497/26018/5916/80736/25794/56603/9750/1969/24147/7291/25861/9935/197021/579/4487/6935/596/6909/2200/2487/8013/7070/115908/652/2737/4237/4920/1296/1289/2202/7068/1290/1295/220/5764/1301
GO:0032506	GO:0032506	cytokinetic process	39	0.518877	1.76753	0.00115176	0.00456062	0.00248199	448	tags=21%	list=3%	signal=20%	54443/10112/9212/29127/9585/1894/9493/55165
GO:0006939	GO:0006939	smooth muscle contraction	81	-0.42778	-1.72751	0.00115769	0.00457958	0.0024923	1820	tags=31%	list=12%	signal=27%	10203/7442/3356/5592/5997/5724/6722/51738/6915/1910/8877/857/3778/5733/6525/4629/147/4638/23213/55959/1311/59/255743/5743/1264
GO:0006977	GO:0006977	DNA damage response	signal transduction by p53 class mediator resulting in cell cycle arrest	55	0.473967	1.71461	0.00117049	0.00462568	0.00251739	259	tags=16%	list=2%	signal=16%	891/995/1869/983/6790/144455/2810/51512/79733
GO:0030833	GO:0030833	regulation of actin filament polymerization	140	-0.368151	-1.60063	0.00117856	0.00465298	0.00253225	3258	tags=36%	list=21%	signal=28%	6712/50853/23406/6711/2017/11078/23191/382/64857/8440/146206/653857/23189/10109/7408/51466/387/5581/832/11344/80206/7114/10095/3071/7454/55243/10458/5063/51332/9886/9535/10435/3059/29767/91663/57731/148170/3055/2059/10602/3383/2039/79822/11135/2934/163782/93663/2006/9353/25802
GO:0003170	GO:0003170	heart valve development	58	-0.480696	-1.81791	0.00118088	0.0046576	0.00253477	2832	tags=38%	list=19%	signal=31%	4772/5138/23462/26508/182/6092/7132/4846/56999/7291/2702/6091/10439/7133/652/6586/7048/6615/2006/11117/9353/3491
GO:0034103	GO:0034103	regulation of tissue remodeling	61	-0.477948	-1.81501	0.001191	0.0046929	0.00255397	1799	tags=33%	list=12%	signal=29%	9464/9066/3606/760/26585/84959/7128/10457/5027/4054/1901/6696/3635/1956/3690/8792/1436/7421/338773/3569
GO:0002832	GO:0002832	negative regulation of response to biotic stimulus	79	-0.435936	-1.74603	0.00121191	0.00477064	0.00259629	2879	tags=37%	list=19%	signal=30%	197358/9111/10875/10225/384/56833/6397/79132/10221/2896/114132/3134/84868/114769/10475/7128/11221/54625/10859/3965/3133/3559/11213/84166/3428/710/1378/11326/5654
GO:0032088	GO:0032088	negative regulation of NF-kappaB transcription factor activity	70	-0.447265	-1.74938	0.00121473	0.00477709	0.00259979	2383	tags=31%	list=16%	signal=27%	1611/3654/153090/84868/7114/9314/84807/3586/4792/7128/3656/84875/1240/114548/80149/1029/1545/11213/84166/57413/56849/5740
GO:0032922	GO:0032922	circadian regulation of gene expression	56	-0.481879	-1.81954	0.00121902	0.00478832	0.00260591	2808	tags=38%	list=18%	signal=31%	8863/4862/5465/406/1407/9500/25819/5187/8864/196/4804/9572/1408/5371/10135/1958/8204/463/8553/112464/79365
GO:0046461	GO:0046461	neutral lipid catabolic process	31	0.566638	1.82307	0.00122116	0.00478832	0.00260591	3359	tags=48%	list=22%	signal=38%	336/344/4023/80339/2166/9388/51099/1373/335/440503/6653/2822/26090/7920/2171
GO:0046464	GO:0046464	acylglycerol catabolic process	31	0.566638	1.82307	0.00122116	0.00478832	0.00260591	3359	tags=48%	list=22%	signal=38%	336/344/4023/80339/2166/9388/51099/1373/335/440503/6653/2822/26090/7920/2171
GO:1902743	GO:1902743	regulation of lamellipodium organization	37	-0.540615	-1.86016	0.00123228	0.00482723	0.00262708	3272	tags=51%	list=21%	signal=40%	55909/6714/538/146206/23189/8874/10109/832/11344/7454/6624/1969/5365/5168/960/2039/23603/10630/9353
GO:2001056	GO:2001056	positive regulation of cysteine-type endopeptidase activity	128	-0.38478	-1.65119	0.00125798	0.0049231	0.00267926	2418	tags=28%	list=16%	signal=24%	7124/8717/1611/387/2902/1612/9966/10550/83595/23151/9647/834/8743/83874/5641/4804/64170/5371/114548/1512/3965/6091/837/6279/22861/64581/64065/355/4609/2934/3428/10395/1490/6280/3491/2152
GO:0000302	GO:0000302	response to reactive oxygen species	200	-0.34274	-1.56777	0.00125943	0.00492402	0.00267975	2089	tags=24%	list=14%	signal=21%	2876/695/8754/84557/5311/9314/5831/6382/558/3586/5660/4846/7128/2353/301/5829/948/4318/11035/7168/388/5159/3082/8877/10628/596/2308/1956/55364/8013/1545/2775/1843/140885/7226/5156/6649/1263/80310/3725/1800/10365/8061/1277/10516/4313/3569
GO:0055123	GO:0055123	digestive system development	105	-0.398476	-1.66053	0.00126085	0.00492476	0.00268016	1570	tags=24%	list=10%	signal=22%	91461/8854/5979/1910/3274/1028/445/579/3643/596/6909/1956/5156/652/7048/2737/79633/7043/6943/6343/1281/6608/5919/79827/6423
GO:0010470	GO:0010470	regulation of gastrulation	33	-0.560695	-1.88082	0.00126732	0.00494525	0.00269131	2730	tags=48%	list=18%	signal=40%	130497/55897/2260/8324/9314/23187/3557/3586/26011/91663/4155/90102/1289/407006/1290/6423
GO:0015749	GO:0015749	monosaccharide transmembrane transport	87	-0.429136	-1.74513	0.00128181	0.00499695	0.00271944	2495	tags=33%	list=16%	signal=28%	8682/144195/7124/1389/51422/6515/50651/5467/6041/9481/6253/55198/28999/6513/8660/6518/23433/9962/3553/5295/56606/3643/718/55022/81031/8013/10580/3479/5167
GO:0031668	GO:0031668	cellular response to extracellular stimulus	239	-0.319261	-1.48422	0.00129343	0.00503736	0.00274144	1755	tags=18%	list=11%	signal=16%	10458/7442/968/558/1535/6722/2353/5587/6513/467/5027/2621/5292/4067/10631/7378/79567/55062/199/596/10135/2308/55364/80149/3383/220441/355/25959/1536/23710/3371/29103/3428/7421/3725/3077/8061/1277/1030/5743/5764/2350/6423
GO:0007601	GO:0007601	visual perception	126	-0.384865	-1.64496	0.00129534	0.00503994	0.00274284	2693	tags=27%	list=18%	signal=22%	93589/6101/3299/64072/3913/7439/3801/285440/6314/5470/7299/3983/25794/4070/10319/768206/197021/2743/54437/10052/1545/155051/7045/4942/2034/2070/4060/7078/83872/1277/9249/2202/6004/1301
GO:0031952	GO:0031952	regulation of protein autophosphorylation	47	-0.501876	-1.81274	0.001306	0.00507623	0.00276259	3091	tags=49%	list=20%	signal=39%	6714/57826/7422/7016/5911/5912/5788/5526/2675/85456/26585/10457/857/9770/55364/2022/7424/1636/5155/54206/80310/3725/5167
GO:0003018	GO:0003018	vascular process in circulatory system	127	-0.382519	-1.64236	0.00130719	0.00507623	0.00276259	3223	tags=43%	list=21%	signal=34%	59342/3162/7040/6648/6714/80005/7422/29/2982/1889/133/2053/10242/135/5138/1909/2852/10266/1113/7349/387/3269/143872/5467/8985/8864/2876/9732/5797/7010/3356/5592/4846/5997/5724/284/6915/1910/3274/2702/857/1956/59341/3383/3778/147/1003/1636/1311/59/8862/9353/5743/3569
GO:0046677	GO:0046677	response to antibiotic	273	-0.314889	-1.49068	0.00131015	0.00507829	0.00276371	2362	tags=24%	list=15%	signal=21%	387/2113/2902/5581/824/107/1191/2876/6774/113/8754/196/84557/9314/80854/5831/4129/6382/558/3586/5660/5997/7128/301/3709/6915/11035/388/5159/3082/8877/2059/5321/10628/6279/6688/596/2308/55364/80149/1958/3383/8013/1545/2775/3399/1536/1843/140885/3371/2934/761/7226/6678/4261/5155/80310/1946/929/3725/10365/8061/1277/8639/5999/3569
GO:0097756	GO:0097756	negative regulation of blood vessel diameter	55	-0.466322	-1.75306	0.00131024	0.00507829	0.00276371	3031	tags=47%	list=20%	signal=38%	80005/1889/133/10242/1909/1113/387/3269/143872/8864/9732/3356/5724/6915/1910/3274/2702/857/1956/3383/147/1636/1311/59/8862/5743
[truncated: 607 more rows]

## Sheet: RecurrentvPrimary DSRCT KEGG
	ID	Description	setSize	enrichmentScore	NES	pvalue	p.adjust	qvalues	rank	leading_edge	core_enrichment
[truncated: 112 more rows]

## Sheet: DSRCT v. SARC Normal GO-BP
ID	Description	setSize	enrichmentScore	NES	pvalue	p.adjust	qvalue	rank	leading_edge	core_enrichment
[truncated: 328 more rows]

[truncated: 1 more sheets: DSRCT v. LIHC Normal GO-BP]
